# Supplementary material for: Metatranscriptomic Assessment of the Microbial Community Associated With the Flavescence dorée Phytoplasma Insect Vector Scaphoideus titanus
Source: Front Microbiol. 2022 Apr 19;13:866523. doi: 10.3389/fmicb.2022.866523 (PMC9063733; doi:10.3389/fmicb.2022.866523)
Supplement: Supplementary file 4 [file Data_Sheet_3.xlsx]

## Sheet: StIT1_chordata
transcript_ID	transcript_length	mapped_reads	best_hit_accession_number	best_hit_description	Conserved_domains	E_value	species	phylum
TRINITY_DN279_c0_g1_i8	1748	9072	XP_029634122.1	XP_029634122.1 polyubiquitin-C [Octopus sinensis]	Ubl_ubiquitin	0	Octopus sinensis	Mollusca
TRINITY_DN279_c0_g1_i8	1748	9072	KAF6278671.1	KAF6278671.1 ubiquitin C [Rhinolophus ferrumequinum]	Ubl_ubiquitin	0	Rhinolophus ferrumequinum	Chordata
TRINITY_DN279_c0_g1_i8	1748	9072	XP_037673209.1	XP_037673209.1 LOW QUALITY PROTEIN: polyubiquitin-C [Choloepus didactylus]	Ubl_ubiquitin	0	Choloepus didactylus	Chordata
TRINITY_DN279_c0_g1_i8	1748	9072	XP_032953835.1	XP_032953835.1 polyubiquitin-C [Rhinolophus ferrumequinum]	Ubl_ubiquitin	0	Rhinolophus ferrumequinum	Chordata
TRINITY_DN279_c0_g1_i8	1748	9072	NP_001193236.1	NP_001193236.1 polyubiquitin-C [Bos taurus]	Ubl_ubiquitin	0	Bos taurus;Bos indicus	Chordata
TRINITY_DN279_c0_g1_i8	1748	9072	XP_005691399.2	XP_005691399.2 PREDICTED: polyubiquitin-C [Capra hircus]	Ubl_ubiquitin	0	Capra hircus	Chordata
TRINITY_DN279_c0_g1_i8	1748	9072	XP_027422837.1	XP_027422837.1 polyubiquitin-C [Bos indicus x Bos taurus]	Ubl_ubiquitin	0	Bos indicus x Bos taurus	Chordata
TRINITY_DN279_c0_g1_i8	1748	9072	XP_006050061.2	XP_006050061.2 polyubiquitin-C [Bubalus bubalis]	Ubl_ubiquitin	0	Bos mutus;Bubalus bubalis	Chordata
TRINITY_DN279_c0_g1_i8	1748	9072	KAG5198635.1	KAG5198635.1 hypothetical protein JEQ12_007231 [Ovis aries]	Ubl_ubiquitin	0	Ovis aries	Chordata
TRINITY_DN279_c0_g1_i8	1748	9072	XP_032431943.1	XP_032431943.1 polyubiquitin-B isoform X4 [Xiphophorus hellerii]	Ubl_ubiquitin	0	Xiphophorus hellerii	Chordata
TRINITY_DN279_c0_g1_i8	1748	9072	XP_027886666.1	XP_027886666.1 polyubiquitin-B isoform X3 [Xiphophorus couchianus]	Ubl_ubiquitin	0	Xiphophorus couchianus	Chordata
TRINITY_DN279_c0_g1_i8	1748	9072	XP_030216678.1	XP_030216678.1 LOW QUALITY PROTEIN: polyubiquitin-B [Gadus morhua]	Ubl_ubiquitin	0	Gadus morhua	Chordata
TRINITY_DN279_c0_g1_i8	1748	9072	XP_035681336.1	XP_035681336.1 polyubiquitin-C [Branchiostoma floridae]	Ubl_ubiquitin	0	Branchiostoma floridae	Chordata
TRINITY_DN279_c0_g1_i8	1748	9072	XP_023197753.1	XP_023197753.1 polyubiquitin-B isoform X3 [Xiphophorus maculatus]	Ubl_ubiquitin	0	Xiphophorus maculatus	Chordata
TRINITY_DN279_c0_g1_i8	1748	9072	BAF84228.1	BAF84228.1 unnamed protein product [Homo sapiens]	Ubl_ubiquitin	0	Homo sapiens	Chordata
TRINITY_DN279_c0_g1_i8	1748	9072	XP_040175114.1	XP_040175114.1 polyubiquitin-C-like [Anopheles arabiensis]	Ubl_ubiquitin	0	Anopheles arabiensis	Arthropoda
TRINITY_DN279_c0_g1_i8	1748	9072	XP_033634917.1	XP_033634917.1 polyubiquitin-C [Asterias rubens]	Ubl_ubiquitin	0	Asterias rubens	Echinodermata
TRINITY_DN279_c0_g1_i8	1748	9072	NP_066289.3	NP_066289.3 polyubiquitin-C [Homo sapiens]	Ubl_ubiquitin	0	Gorilla gorilla gorilla;Pan troglodytes;Homo sapiens;Bos mutus;Ochotona curzoniae	Chordata
TRINITY_DN279_c0_g1_i8	1748	9072	XP_038615040.1	XP_038615040.1 polyubiquitin-C isoform X1 [Tachyglossus aculeatus]	Ubl_ubiquitin	0	Tachyglossus aculeatus	Chordata
TRINITY_DN279_c0_g1_i8	1748	9072	XP_021479246.2	XP_021479246.2 polyubiquitin-B isoform X1 [Oncorhynchus mykiss]	Ubl_ubiquitin	0	Oncorhynchus mykiss	Chordata
TRINITY_DN35_c0_g1_i2	2200	3586	EMP26515.1	EMP26515.1 Polyubiquitin-C, partial [Chelonia mydas]	Ubl_ubiquitin	1.55e-85	Chelonia mydas	Chordata
TRINITY_DN35_c0_g1_i2	2200	3586	NXD50809.1	NXD50809.1 UBIQP protein [Corvus moneduloides]	Ubl_ubiquitin	1.66e-85	Corvus moneduloides	Chordata
TRINITY_DN35_c0_g1_i2	2200	3586	NWH99288.1	NWH99288.1 UBIQP protein [Tichodroma muraria]	Ubl_ubiquitin	1.66e-85	Ptilonorhynchus violaceus;Cisticola juncidis;Loxia leucoptera;Cardinalis cardinalis;Vidua macroura;Tichodroma muraria;Melanocharis versteri;Pheucticus melanocephalus;Erpornis zantholeuca;Chloropsis cyanopogon;Leptocoma aspasia	Chordata
TRINITY_DN35_c0_g1_i2	2200	3586	NWS24299.1	NWS24299.1 UBIQP protein [Polioptila caerulea]	Ubl_ubiquitin	1.72e-85	Polioptila caerulea;Anthoscopus minutus;Sclerurus mexicanus;Ploceus nigricollis	Chordata
TRINITY_DN35_c0_g1_i2	2200	3586	KAF1480860.1	KAF1480860.1 hypothetical protein FQV08_0000988, partial [Pygoscelis antarcticus]	Ubl_ubiquitin	1.84e-85	Pygoscelis antarcticus	Chordata
TRINITY_DN35_c0_g1_i2	2200	3586	NWS15745.1	NWS15745.1 UBIQP protein [Pachyramphus minor]	Ubl_ubiquitin	1.9e-85	Pachyramphus minor	Chordata
TRINITY_DN35_c0_g1_i2	2200	3586	NWX85561.1	NWX85561.1 UBIQP protein [Nothoprocta pentlandii]	Ubl_ubiquitin	1.9e-85	Nothoprocta pentlandii	Chordata
TRINITY_DN35_c0_g1_i2	2200	3586	NXC37402.1	NXC37402.1 UBIQP protein [Campylorhamphus procurvoides]	Ubl_ubiquitin	1.9e-85	Campylorhamphus procurvoides	Chordata
TRINITY_DN35_c0_g1_i2	2200	3586	NXI97782.1	NXI97782.1 UBIQP protein [Psophia crepitans]	Ubl_ubiquitin	1.9e-85	Psophia crepitans	Chordata
TRINITY_DN35_c0_g1_i2	2200	3586	NXG33198.1	NXG33198.1 UBIQP protein [Dromaius novaehollandiae]	Ubl_ubiquitin	1.9e-85	Dromaius novaehollandiae	Chordata
TRINITY_DN35_c0_g1_i2	2200	3586	NXA37315.1	NXA37315.1 UBIQP protein [Eudromia elegans]	Ubl_ubiquitin	1.9e-85	Eudromia elegans	Chordata
TRINITY_DN35_c0_g1_i2	2200	3586	NXQ80997.1	NXQ80997.1 UBIQP protein [Nyctibius grandis]	Ubl_ubiquitin	2.04e-85	Nyctibius grandis	Chordata
TRINITY_DN35_c0_g1_i2	2200	3586	BAC56573.1	BAC56573.1 similar to polyubiquitin, partial [Bos taurus]	Ubl_ubiquitin	2.77e-85	Bos taurus	Chordata
TRINITY_DN35_c0_g1_i2	2200	3586	NWW18108.1	NWW18108.1 UBB protein [Falcunculus frontatus]	Ubl_ubiquitin	3.65e-85	Falcunculus frontatus	Chordata
TRINITY_DN35_c0_g1_i2	2200	3586	XP_032697184.1	XP_032697184.1 polyubiquitin-B isoform X1 [Lontra canadensis]	Ubl_ubiquitin	3.78e-85	Lontra canadensis	Chordata
TRINITY_DN35_c0_g1_i2	2200	3586	NWU92880.1	NWU92880.1 UBIQP protein [Upupa epops]	Ubl_ubiquitin	4.02e-85	Upupa epops	Chordata
TRINITY_DN35_c0_g1_i2	2200	3586	AAV35212.1	AAV35212.1 polyubiquitin-like protein, partial [Schistosoma japonicum]	Ubl_ubiquitin	4.61e-85	Schistosoma japonicum	Platyhelminthes
TRINITY_DN35_c0_g1_i2	2200	3586	KAG7471281.1	KAG7471281.1 hypothetical protein MATL_G00122750 [Megalops atlanticus]	Ubl_ubiquitin	4.64e-85	Megalops atlanticus	Chordata
TRINITY_DN35_c0_g1_i2	2200	3586	NXB30990.1	NXB30990.1 UBIQP protein [Eulacestoma nigropectus]	Ubl_ubiquitin	4.77e-85	Eulacestoma nigropectus	Chordata
TRINITY_DN35_c0_g1_i2	2200	3586	CAA64326.1	CAA64326.1 ubiquitin, partial [Carabus alpestris]	Ubl_ubiquitin	5.09e-85	Carabus alpestris	Arthropoda
TRINITY_DN7307_c0_g1_i12	7543	2850	XP_033978450.1	XP_033978450.1 uncharacterized protein LOC117476190 [Trematomus bernacchii]	DUF4371 superfamily	2.16e-242	Trematomus bernacchii	Chordata
TRINITY_DN7307_c0_g1_i12	7543	2850	XP_042073318.1	XP_042073318.1 uncharacterized protein LOC121813551 [Haplochromis burtoni]	DUF4371 superfamily	1.78e-228	Haplochromis burtoni	Chordata
TRINITY_DN7307_c0_g1_i12	7543	2850	XP_019206715.2	XP_019206715.2 uncharacterized protein LOC109196779 [Oreochromis niloticus]	DUF4371 superfamily	3.08e-228	Oreochromis niloticus	Chordata
TRINITY_DN7307_c0_g1_i12	7543	2850	XP_039462400.1	XP_039462400.1 uncharacterized protein LOC120436086 [Oreochromis aureus]	DUF4371 superfamily	3.08e-228	Oreochromis aureus	Chordata
TRINITY_DN7307_c0_g1_i12	7543	2850	XP_034060925.1	XP_034060925.1 uncharacterized protein LOC117539032 [Gymnodraco acuticeps]	DUF4371 superfamily	1.65e-227	Gymnodraco acuticeps	Chordata
TRINITY_DN7307_c0_g1_i12	7543	2850	XP_030264273.1	XP_030264273.1 zinc finger MYM-type protein 1-like [Sparus aurata]	DUF4371 superfamily	1.29e-225	Sparus aurata	Chordata
TRINITY_DN7307_c0_g1_i12	7543	2850	XP_026133409.1	XP_026133409.1 zinc finger MYM-type protein 1-like [Carassius auratus]	DUF4371 superfamily	1.51e-223	Carassius auratus	Chordata
TRINITY_DN7307_c0_g1_i12	7543	2850	XP_034073708.1	XP_034073708.1 uncharacterized protein LOC117547230 [Gymnodraco acuticeps]	DUF4371 superfamily	1.74e-223	Gymnodraco acuticeps	Chordata
TRINITY_DN7307_c0_g1_i12	7543	2850	XP_026108666.1	XP_026108666.1 zinc finger MYM-type protein 1-like [Carassius auratus]	DUF4371 superfamily	2.53e-223	Carassius auratus	Chordata
TRINITY_DN7307_c0_g1_i12	7543	2850	XP_034091820.1	XP_034091820.1 uncharacterized protein LOC117559253 [Gymnodraco acuticeps]	DUF4371 superfamily	4.63e-222	Gymnodraco acuticeps	Chordata
TRINITY_DN7307_c0_g1_i12	7543	2850	XP_026132853.1	XP_026132853.1 zinc finger MYM-type protein 1-like [Carassius auratus]	DUF4371 superfamily	1.66e-215	Carassius auratus	Chordata
TRINITY_DN7307_c0_g1_i12	7543	2850	XP_035808652.1	XP_035808652.1 uncharacterized protein LOC111575149 isoform X2 [Amphiprion ocellaris]	DUF4371 superfamily	4.21e-212	Amphiprion ocellaris	Chordata
TRINITY_DN7307_c0_g1_i12	7543	2850	XP_035808650.1	XP_035808650.1 uncharacterized protein LOC111575149 isoform X1 [Amphiprion ocellaris]	DUF4371 superfamily	4.72e-211	Amphiprion ocellaris	Chordata
TRINITY_DN7307_c0_g1_i12	7543	2850	KAF0768179.1	KAF0768179.1 Uncharacterized protein FWK35_00015196 [Aphis craccivora]	DUF4371 superfamily	2.07e-206	Aphis craccivora	Arthropoda
TRINITY_DN7307_c0_g1_i12	7543	2850	XP_034074376.1	XP_034074376.1 uncharacterized protein LOC117547705 [Gymnodraco acuticeps]	DUF4371 superfamily	6.3e-206	Gymnodraco acuticeps	Chordata
TRINITY_DN7307_c0_g1_i12	7543	2850	XP_025208534.1	XP_025208534.1 uncharacterized protein LOC112603919 [Melanaphis sacchari]	DUF4371 superfamily	2.86e-197	Melanaphis sacchari	Arthropoda
TRINITY_DN7307_c0_g1_i12	7543	2850	XP_034073709.1	XP_034073709.1 uncharacterized protein LOC117547231 [Gymnodraco acuticeps]	DUF4371 superfamily	1.1e-191	Gymnodraco acuticeps	Chordata
TRINITY_DN7307_c0_g1_i12	7543	2850	KAF0714044.1	KAF0714044.1 Zinc finger MYM-type protein 1, partial [Aphis craccivora]	DUF4371 superfamily	8.06e-189	Aphis craccivora	Arthropoda
TRINITY_DN7307_c0_g1_i12	7543	2850	XP_034051779.1	XP_034051779.1 uncharacterized protein LOC117532559 [Gymnodraco acuticeps]	DUF4371 superfamily	1.79e-181	Gymnodraco acuticeps	Chordata
TRINITY_DN7307_c0_g1_i12	7543	2850	KAF0746597.1	KAF0746597.1 Uncharacterized protein FWK35_00030574 [Aphis craccivora]	DUF4371 superfamily	2.64e-181	Aphis craccivora	Arthropoda
TRINITY_DN3003_c0_g1_i1	4833	2432	XP_007885558.1	XP_007885558.1 cohesin subunit SA-1a [Callorhinchus milii]	#N/A	4.25e-12	Callorhinchus milii	Chordata
TRINITY_DN3003_c0_g1_i1	4833	2432	XP_041066801.1	XP_041066801.1 cohesin subunit SA-1 isoform X2 [Carcharodon carcharias]	#N/A	7.3e-12	Carcharodon carcharias	Chordata
TRINITY_DN3003_c0_g1_i1	4833	2432	GCC32335.1	GCC32335.1 hypothetical protein [Chiloscyllium punctatum]	#N/A	7.61e-12	Chiloscyllium punctatum	Chordata
TRINITY_DN3003_c0_g1_i1	4833	2432	XP_016128761.1	XP_016128761.1 PREDICTED: cohesin subunit SA-1, partial [Sinocyclocheilus grahami]	#N/A	9.57e-12	Sinocyclocheilus grahami	Chordata
TRINITY_DN3003_c0_g1_i1	4833	2432	KAA0719203.1	KAA0719203.1 Cohesin subunit SA-1 SCC3 -like protein 1 [Triplophysa tibetana]	#N/A	1.25e-11	Triplophysa tibetana	Chordata
TRINITY_DN3003_c0_g1_i1	4833	2432	XP_016341654.1	XP_016341654.1 PREDICTED: cohesin subunit SA-1 [Sinocyclocheilus anshuiensis]	#N/A	1.64e-11	Sinocyclocheilus anshuiensis	Chordata
TRINITY_DN3003_c0_g1_i1	4833	2432	XP_041419895.1	XP_041419895.1 cohesin subunit SA-1 isoform X2 [Xenopus laevis]	#N/A	2.13e-11	Xenopus laevis	Chordata
TRINITY_DN3003_c0_g1_i1	4833	2432	ROL44681.1	ROL44681.1 Cohesin subunit SA-1 [Anabarilius grahami]	#N/A	2.15e-11	Anabarilius grahami	Chordata
TRINITY_DN3003_c0_g1_i1	4833	2432	NP_001083864.1	NP_001083864.1 cohesin subunit SA-1 [Xenopus laevis]	#N/A	2.16e-11	Xenopus laevis	Chordata
TRINITY_DN3003_c0_g1_i1	4833	2432	XP_041419892.1	XP_041419892.1 cohesin subunit SA-1 isoform X1 [Xenopus laevis]	#N/A	2.16e-11	Xenopus laevis	Chordata
TRINITY_DN3003_c0_g1_i1	4833	2432	KAE8604908.1	KAE8604908.1 hypothetical protein XENTR_v10014887 [Xenopus tropicalis]	#N/A	2.76e-11	Xenopus tropicalis	Chordata
TRINITY_DN3003_c0_g1_i1	4833	2432	KAE8604907.1	KAE8604907.1 hypothetical protein XENTR_v10014887 [Xenopus tropicalis]	#N/A	2.82e-11	Xenopus tropicalis	Chordata
TRINITY_DN3003_c0_g1_i1	4833	2432	XP_020472312.1	XP_020472312.1 cohesin subunit SA-1 isoform X2 [Monopterus albus]	#N/A	2.82e-11	Monopterus albus	Chordata
TRINITY_DN3003_c0_g1_i1	4833	2432	GCB73958.1	GCB73958.1 hypothetical protein [Scyliorhinus torazame]	#N/A	2.83e-11	Scyliorhinus torazame	Chordata
TRINITY_DN3003_c0_g1_i1	4833	2432	XP_038671893.1	XP_038671893.1 cohesin subunit SA-1a [Scyliorhinus canicula]	#N/A	2.83e-11	Scyliorhinus canicula	Chordata
TRINITY_DN3003_c0_g1_i1	4833	2432	XP_020472309.1	XP_020472309.1 cohesin subunit SA-1 isoform X1 [Monopterus albus]	#N/A	2.83e-11	Monopterus albus	Chordata
TRINITY_DN3003_c0_g1_i1	4833	2432	XP_012825569.1	XP_012825569.1 cohesin subunit SA-1 isoform X1 [Xenopus tropicalis]	#N/A	2.83e-11	Xenopus tropicalis	Chordata
TRINITY_DN3003_c0_g1_i1	4833	2432	NP_001121432.1	NP_001121432.1 cohesin subunit SA-1 [Xenopus tropicalis]	#N/A	2.83e-11	Xenopus tropicalis	Chordata
TRINITY_DN3003_c0_g1_i1	4833	2432	XP_020388717.1	XP_020388717.1 cohesin subunit SA-1 isoform X2 [Rhincodon typus]	#N/A	3.29e-11	Rhincodon typus	Chordata
TRINITY_DN3003_c0_g1_i1	4833	2432	XP_030623320.1	XP_030623320.1 cohesin subunit SA-1-like isoform X1 [Chanos chanos]	#N/A	3.7e-11	Chanos chanos	Chordata
TRINITY_DN4488_c0_g1_i10	8149	2184	XP_042308880.1	XP_042308880.1 zinc finger MYM-type protein 1-like isoform X1 [Sceloporus undulatus]	DUF4371 superfamily	0	Sceloporus undulatus	Chordata
TRINITY_DN4488_c0_g1_i10	8149	2184	XP_042308882.1	XP_042308882.1 zinc finger MYM-type protein 1-like isoform X2 [Sceloporus undulatus]	DUF4371 superfamily	0	Sceloporus undulatus	Chordata
TRINITY_DN4488_c0_g1_i10	8149	2184	XP_015927061.1	XP_015927061.1 zinc finger MYM-type protein 1-like [Parasteatoda tepidariorum]	DUF4371 superfamily	2.91e-301	Parasteatoda tepidariorum	Arthropoda
TRINITY_DN4488_c0_g1_i10	8149	2184	XP_002124374.1	XP_002124374.1 zinc finger MYM-type protein 1-like, partial [Ciona intestinalis]	DUF4371 superfamily	1.41e-255	Ciona intestinalis	Chordata
TRINITY_DN4488_c0_g1_i10	8149	2184	XP_040270037.1	XP_040270037.1 zinc finger MYM-type protein 1-like [Bufo bufo]	DUF4371 superfamily	5.23e-228	Bufo bufo	Chordata
TRINITY_DN4488_c0_g1_i10	8149	2184	OCT96206.1	OCT96206.1 hypothetical protein XELAEV_18013881mg [Xenopus laevis]	DUF4371 superfamily	1.89e-225	Xenopus laevis	Chordata
TRINITY_DN4488_c0_g1_i10	8149	2184	XP_038210847.1	XP_038210847.1 zinc finger MYM-type protein 1-like [Zerene cesonia]	DUF4371 superfamily	2.74e-222	Zerene cesonia	Arthropoda
TRINITY_DN4488_c0_g1_i10	8149	2184	KAE9533683.1	KAE9533683.1 hypothetical protein AGLY_009032 [Aphis glycines]	DUF4371 superfamily	1.72e-218	Aphis glycines	Arthropoda
TRINITY_DN4488_c0_g1_i10	8149	2184	XP_026481391.1	XP_026481391.1 zinc finger MYM-type protein 1-like [Ctenocephalides felis]	DUF4371 superfamily	9.02e-209	Ctenocephalides felis	Arthropoda
TRINITY_DN4488_c0_g1_i10	8149	2184	XP_034069746.1	XP_034069746.1 zinc finger MYM-type protein 1-like [Gymnodraco acuticeps]	DUF4371 superfamily	2.61e-207	Gymnodraco acuticeps	Chordata
TRINITY_DN4488_c0_g1_i10	8149	2184	KAE9534354.1	KAE9534354.1 hypothetical protein AGLY_008444 [Aphis glycines]	DUF4371 superfamily	3.42e-203	Aphis glycines	Arthropoda
TRINITY_DN4488_c0_g1_i10	8149	2184	XP_037297251.1	XP_037297251.1 zinc finger MYM-type protein 1-like [Manduca sexta]	DUF4371 superfamily	1.07e-200	Manduca sexta	Arthropoda
TRINITY_DN4488_c0_g1_i10	8149	2184	XP_015369428.1	XP_015369428.1 PREDICTED: zinc finger MYM-type protein 1-like [Diuraphis noxia]	DUF4371 superfamily	7.7e-194	Diuraphis noxia	Arthropoda
TRINITY_DN4488_c0_g1_i10	8149	2184	KAF0749919.1	KAF0749919.1 zinc finger MYM-type protein 1-like, partial [Aphis craccivora]	DUF4371 superfamily	3.1e-193	Aphis craccivora	Arthropoda
TRINITY_DN4488_c0_g1_i10	8149	2184	XP_022180192.1	XP_022180192.1 zinc finger MYM-type protein 1-like [Myzus persicae]	DUF4371 superfamily	1.97e-188	Myzus persicae	Arthropoda
TRINITY_DN4488_c0_g1_i10	8149	2184	XP_035433159.1	XP_035433159.1 zinc finger MYM-type protein 1-like [Spodoptera frugiperda]	DUF4371 superfamily	1.11e-184	Spodoptera frugiperda	Arthropoda
TRINITY_DN4488_c0_g1_i10	8149	2184	XP_013188693.1	XP_013188693.1 PREDICTED: zinc finger MYM-type protein 1-like [Amyelois transitella]	DUF4371 superfamily	2.86e-184	Amyelois transitella	Arthropoda
TRINITY_DN4488_c0_g1_i10	8149	2184	KAE9535292.1	KAE9535292.1 hypothetical protein AGLY_008025 [Aphis glycines]	DUF4371 superfamily	1.78e-181	Aphis glycines	Arthropoda
TRINITY_DN4488_c0_g1_i10	8149	2184	XP_034061602.1	XP_034061602.1 zinc finger MYM-type protein 1-like [Gymnodraco acuticeps]	DUF4371 superfamily	5.91e-181	Gymnodraco acuticeps	Chordata
TRINITY_DN4488_c0_g1_i10	8149	2184	KAG8540294.1	KAG8540294.1 hypothetical protein GDO81_019541 [Engystomops pustulosus]	DUF4371 superfamily	1.65e-179	Engystomops pustulosus	Chordata
TRINITY_DN1196_c0_g1_i5	1785	2114	XP_015919270.1	XP_015919270.1 macrophage mannose receptor 1 [Parasteatoda tepidariorum]	CLECT	7.67e-13	Parasteatoda tepidariorum	Arthropoda
TRINITY_DN1196_c0_g1_i5	1785	2114	XP_041665579.1	XP_041665579.1 ladderlectin-like [Cheilinus undulatus]	CLECT	1.02e-11	Cheilinus undulatus	Chordata
TRINITY_DN1196_c0_g1_i5	1785	2114	XP_022054011.1	XP_022054011.1 lactose-binding lectin l-2-like [Acanthochromis polyacanthus]	CLECT	1.39e-11	Acanthochromis polyacanthus	Chordata
TRINITY_DN1196_c0_g1_i5	1785	2114	AXL95266.1	AXL95266.1 C-type lectin 2, partial [Spilotes sulphureus]	CLECT	3.68e-11	Spilotes sulphureus	Chordata
TRINITY_DN1196_c0_g1_i5	1785	2114	KAF5892351.1	KAF5892351.1 putative C-type lectin domain family 20 member A isoform X1, partial [Clarias magur]	CLECT	4.62e-11	Clarias magur	Chordata
TRINITY_DN1196_c0_g1_i5	1785	2114	XP_027143947.1	XP_027143947.1 galactose-specific lectin nattectin-like isoform X22 [Larimichthys crocea]	CLECT	8.06e-11	Larimichthys crocea	Chordata
TRINITY_DN1196_c0_g1_i5	1785	2114	XP_033472485.1	XP_033472485.1 lactose-binding lectin l-2-like [Epinephelus lanceolatus]	CLECT	1.05e-10	Epinephelus lanceolatus	Chordata
TRINITY_DN1196_c0_g1_i5	1785	2114	XP_027893478.1	XP_027893478.1 type-2 ice-structuring protein-like [Xiphophorus couchianus]	CLECT	1.1e-10	Xiphophorus couchianus	Chordata
TRINITY_DN1196_c0_g1_i5	1785	2114	XP_033472484.1	XP_033472484.1 lactose-binding lectin l-2-like [Epinephelus lanceolatus]	CLECT	1.21e-10	Epinephelus lanceolatus	Chordata
TRINITY_DN1196_c0_g1_i5	1785	2114	XP_023150246.1	XP_023150246.1 CD209 antigen-like protein A [Amphiprion ocellaris]	CLECT	2.06e-10	Amphiprion ocellaris	Chordata
TRINITY_DN1196_c0_g1_i5	1785	2114	XP_015268454.1	XP_015268454.1 PREDICTED: regenerating islet-derived protein 4-like [Gekko japonicus]	CLECT	2.18e-10	Gekko japonicus	Chordata
TRINITY_DN1196_c0_g1_i5	1785	2114	XP_033492500.1	XP_033492500.1 lactose-binding lectin l-2-like [Epinephelus lanceolatus]	CLECT	2.23e-10	Epinephelus lanceolatus	Chordata
TRINITY_DN1196_c0_g1_i5	1785	2114	XP_027143949.1	XP_027143949.1 galactose-specific lectin nattectin-like isoform X24 [Larimichthys crocea]	CLECT	2.29e-10	Larimichthys crocea	Chordata
TRINITY_DN1196_c0_g1_i5	1785	2114	ACS37721.1	ACS37721.1 C-type lectin-1 [Heligmosomoides polygyrus]	CLECT	2.64e-10	Heligmosomoides polygyrus	Nematoda
TRINITY_DN1196_c0_g1_i5	1785	2114	XP_042362729.1	XP_042362729.1 lactose-binding lectin l-2-like [Plectropomus leopardus]	CLECT	3.04e-10	Plectropomus leopardus	Chordata
TRINITY_DN1196_c0_g1_i5	1785	2114	XP_027143945.1	XP_027143945.1 galactose-specific lectin nattectin-like isoform X20 [Larimichthys crocea]	CLECT	3.13e-10	Larimichthys crocea	Chordata
TRINITY_DN1196_c0_g1_i5	1785	2114	EAT41960.1	EAT41960.1 AAEL006456-PA [Aedes aegypti]	CLECT	3.21e-10	Aedes aegypti	Arthropoda
TRINITY_DN1196_c0_g1_i5	1785	2114	XP_027143936.1	XP_027143936.1 type-2 ice-structuring protein-like isoform X11 [Larimichthys crocea]	CLECT	4.11e-10	Larimichthys crocea	Chordata
TRINITY_DN1196_c0_g1_i5	1785	2114	XP_027143931.1	XP_027143931.1 type-2 ice-structuring protein-like isoform X6 [Larimichthys crocea]	CLECT	4.66e-10	Larimichthys crocea	Chordata
TRINITY_DN1196_c0_g1_i5	1785	2114	XP_027143929.1	XP_027143929.1 type-2 ice-structuring protein-like isoform X4 [Larimichthys crocea]	CLECT	4.66e-10	Larimichthys crocea	Chordata
TRINITY_DN2640_c0_g3_i1	7266	1638	GFO00947.1	GFO00947.1 hypothetical protein PoB_002745200 [Plakobranchus ocellatus]	#N/A	1.69e-45	Plakobranchus ocellatus	Mollusca
TRINITY_DN2640_c0_g3_i1	7266	1638	XP_028977882.2	XP_028977882.2 uncharacterized protein LOC106023908 isoform X3 [Esox lucius]	#N/A	1.51e-40	Esox lucius	Chordata
TRINITY_DN2640_c0_g3_i1	7266	1638	XP_034149923.1	XP_034149923.1 uncharacterized protein LOC106023908 isoform X2 [Esox lucius]	#N/A	1.67e-40	Esox lucius	Chordata
TRINITY_DN2640_c0_g3_i1	7266	1638	XP_028977877.2	XP_028977877.2 uncharacterized protein LOC106023908 isoform X1 [Esox lucius]	#N/A	1.71e-40	Esox lucius	Chordata
TRINITY_DN2640_c0_g3_i1	7266	1638	KAF4113119.1	KAF4113119.1 hypothetical protein G5714_005664 [Onychostoma macrolepis]	#N/A	8.14e-32	Onychostoma macrolepis	Chordata
TRINITY_DN2640_c0_g3_i1	7266	1638	XP_028977884.2	XP_028977884.2 uncharacterized protein LOC106023908 isoform X5 [Esox lucius]	#N/A	3e-29	Esox lucius	Chordata
TRINITY_DN2640_c0_g3_i1	7266	1638	XP_028977883.2	XP_028977883.2 uncharacterized protein LOC106023908 isoform X4 [Esox lucius]	#N/A	3.15e-29	Esox lucius	Chordata
TRINITY_DN2640_c0_g3_i1	7266	1638	KAF4527376.1	KAF4527376.1 hypothetical protein B566_EDAN017689 [Ephemera danica]	#N/A	3.69e-29	Ephemera danica	Arthropoda
TRINITY_DN2640_c0_g3_i1	7266	1638	XP_013765697.1	XP_013765697.1 PREDICTED: uncharacterized protein LOC102206749 isoform X3 [Pundamilia nyererei]	#N/A	1.08e-28	Pundamilia nyererei	Chordata
TRINITY_DN2640_c0_g3_i1	7266	1638	XP_013765696.1	XP_013765696.1 PREDICTED: uncharacterized protein LOC102206749 isoform X2 [Pundamilia nyererei]	#N/A	5.5e-28	Pundamilia nyererei	Chordata
TRINITY_DN2640_c0_g3_i1	7266	1638	XP_005730686.1	XP_005730686.1 PREDICTED: uncharacterized protein LOC102206749 isoform X1 [Pundamilia nyererei]	#N/A	5.51e-28	Pundamilia nyererei	Chordata
TRINITY_DN2640_c0_g3_i1	7266	1638	XP_037073445.1	XP_037073445.1 uncharacterized protein LOC119094489 [Pollicipes pollicipes]	#N/A	6.61e-28	Pollicipes pollicipes	Arthropoda
TRINITY_DN2640_c0_g3_i1	7266	1638	XP_042072640.1	XP_042072640.1 uncharacterized protein LOC102302645 isoform X3 [Haplochromis burtoni]	#N/A	1.37e-27	Haplochromis burtoni	Chordata
TRINITY_DN2640_c0_g3_i1	7266	1638	XP_037073053.1	XP_037073053.1 uncharacterized protein LOC119094078 [Pollicipes pollicipes]	#N/A	1.52e-27	Pollicipes pollicipes	Arthropoda
TRINITY_DN2640_c0_g3_i1	7266	1638	XP_039906311.1	XP_039906311.1 uncharacterized protein LOC120745477 isoform X3 [Simochromis diagramma]	#N/A	3.08e-27	Simochromis diagramma	Chordata
TRINITY_DN2640_c0_g3_i1	7266	1638	XP_039463806.1	XP_039463806.1 uncharacterized protein LOC116330566 [Oreochromis aureus]	#N/A	6.6e-27	Oreochromis aureus	Chordata
TRINITY_DN2640_c0_g3_i1	7266	1638	XP_005952078.1	XP_005952078.1 uncharacterized protein LOC102302645 isoform X1 [Haplochromis burtoni]	#N/A	6.95e-27	Haplochromis burtoni	Chordata
TRINITY_DN2640_c0_g3_i1	7266	1638	XP_037069748.1	XP_037069748.1 uncharacterized protein LOC119091201 [Pollicipes pollicipes]	#N/A	8.09e-27	Pollicipes pollicipes	Arthropoda
TRINITY_DN2640_c0_g3_i1	7266	1638	XP_026042776.1	XP_026042776.1 uncharacterized protein LOC113033311 isoform X2 [Astatotilapia calliptera]	#N/A	9.07e-27	Astatotilapia calliptera	Chordata
TRINITY_DN2640_c0_g3_i1	7266	1638	XP_004566706.1	XP_004566706.1 uncharacterized protein LOC101474547 isoform X3 [Maylandia zebra]	#N/A	1.19e-26	Maylandia zebra	Chordata
TRINITY_DN279_c0_g1_i20	625	1608	NXA65828.1	NXA65828.1 UBB protein [Mohoua ochrocephala]	Ubl_ubiquitin	1.09e-101	Mohoua ochrocephala	Chordata
TRINITY_DN279_c0_g1_i20	625	1608	NXV06335.1	NXV06335.1 UBB protein [Cettia cetti]	Ubl_ubiquitin	1.89e-101	Cettia cetti	Chordata
TRINITY_DN279_c0_g1_i20	625	1608	CAF4252922.1	CAF4252922.1 unnamed protein product, partial [Rotaria sordida]	Ubl_ubiquitin	2.84e-101	Rotaria sordida	Rotifera
TRINITY_DN279_c0_g1_i20	625	1608	NWI69319.1	NWI69319.1 UBB protein [Todus mexicanus]	Ubl_ubiquitin	3.18e-101	Todus mexicanus	Chordata
TRINITY_DN279_c0_g1_i20	625	1608	NXV54428.1	NXV54428.1 UBB protein [Molothrus ater]	Ubl_ubiquitin	4.05e-101	Molothrus ater	Chordata
TRINITY_DN279_c0_g1_i20	625	1608	NXF25325.1	NXF25325.1 UBB protein [Rhodinocichla rosea]	Ubl_ubiquitin	4.05e-101	Rhodinocichla rosea	Chordata
TRINITY_DN279_c0_g1_i20	625	1608	NWU02814.1	NWU02814.1 UBB protein [Urocynchramus pylzowi]	Ubl_ubiquitin	4.19e-101	Urocynchramus pylzowi	Chordata
TRINITY_DN279_c0_g1_i20	625	1608	NXA99188.1	NXA99188.1 UBB protein [Cnemophilus loriae]	Ubl_ubiquitin	4.34e-101	Cnemophilus loriae	Chordata
TRINITY_DN279_c0_g1_i20	625	1608	PNI17311.1	PNI17311.1 UBB isoform 7, partial [Pan troglodytes]	Ubl_ubiquitin	4.34e-101	Pan troglodytes	Chordata
TRINITY_DN279_c0_g1_i20	625	1608	CAF4377274.1	CAF4377274.1 unnamed protein product, partial [Rotaria socialis]	Ubl_ubiquitin	4.49e-101	Rotaria socialis	Rotifera
TRINITY_DN279_c0_g1_i20	625	1608	CAF4926538.1	CAF4926538.1 unnamed protein product [Rotaria sp. Silwood1]	Ubl_ubiquitin	4.65e-101	Rotaria sp. Silwood1	Rotifera
TRINITY_DN279_c0_g1_i20	625	1608	ABO84843.1	ABO84843.1 ubiquitin B [Sus scrofa]	Ubl_ubiquitin	4.81e-101	Sus scrofa	Chordata
TRINITY_DN279_c0_g1_i20	625	1608	XP_022813164.1	XP_022813164.1 polyubiquitin, putative [Plasmodium yoelii]	Ubl_ubiquitin	5.13e-101	Plasmodium yoelii	Apicomplexa
TRINITY_DN279_c0_g1_i20	625	1608	WP_214096090.1	WP_214096090.1 hypothetical protein, partial [Escherichia coli]	Ubl_ubiquitin	5.53e-101	Escherichia coli	Proteobacteria
TRINITY_DN279_c0_g1_i20	625	1608	XP_026212341.1	XP_026212341.1 polyubiquitin-B [Anabas testudineus]	Ubl_ubiquitin	5.53e-101	Anabas testudineus	Chordata
TRINITY_DN279_c0_g1_i20	625	1608	NXL18042.1	NXL18042.1 UBB protein [Setophaga kirtlandii]	Ubl_ubiquitin	5.72e-101	Setophaga kirtlandii	Chordata
TRINITY_DN279_c0_g1_i20	625	1608	NXU92316.1	NXU92316.1 UBB protein [Xiphorhynchus elegans]	Ubl_ubiquitin	6.34e-101	Xiphorhynchus elegans	Chordata
TRINITY_DN279_c0_g1_i20	625	1608	NXQ71690.1	NXQ71690.1 UBB protein [Quiscalus mexicanus]	Ubl_ubiquitin	6.56e-101	Quiscalus mexicanus	Chordata
TRINITY_DN279_c0_g1_i20	625	1608	XP_033296577.1	XP_033296577.1 polyubiquitin-C [Orcinus orca]	Ubl_ubiquitin	6.75e-101	Orcinus orca	Chordata
TRINITY_DN279_c0_g1_i20	625	1608	QHA25239.1	QHA25239.1 polyubiquitin B, partial [Sicarius dolichocephalus]	Ubl_ubiquitin	6.79e-101	Sicarius dolichocephalus	Arthropoda
TRINITY_DN5358_c0_g1_i11	6282	1592	XP_034965595.1	XP_034965595.1 uncharacterized protein LOC118082347 [Zootoca vivipara]	DEAD-like_helicase_N superfamily	0	Zootoca vivipara	Chordata
TRINITY_DN5358_c0_g1_i11	6282	1592	OXA64910.1	OXA64910.1 ATP-dependent DNA helicase PIF1 [Folsomia candida]	DEAD-like_helicase_N superfamily	0	Folsomia candida	Arthropoda
TRINITY_DN5358_c0_g1_i11	6282	1592	XP_041441500.1	XP_041441500.1 uncharacterized protein LOC108706566 [Xenopus laevis]	DEAD-like_helicase_N superfamily	0	Xenopus laevis	Chordata
TRINITY_DN5358_c0_g1_i11	6282	1592	XP_030056983.1	XP_030056983.1 uncharacterized protein LOC115468943 [Microcaecilia unicolor]	DEAD-like_helicase_N superfamily	0	Microcaecilia unicolor	Chordata
TRINITY_DN5358_c0_g1_i11	6282	1592	GCF39998.1	GCF39998.1 hypothetical protein parPi_0000513 [Paroedura picta]	DEAD-like_helicase_N superfamily	0	Paroedura picta	Chordata
TRINITY_DN5358_c0_g1_i11	6282	1592	XP_021961437.1	XP_021961437.1 uncharacterized protein LOC110857104 [Folsomia candida]	DEAD-like_helicase_N superfamily	0	Folsomia candida	Arthropoda
TRINITY_DN5358_c0_g1_i11	6282	1592	XP_021945048.1	XP_021945048.1 uncharacterized protein LOC110843393 [Folsomia candida]	DEAD-like_helicase_N superfamily	0	Folsomia candida	Arthropoda
TRINITY_DN5358_c0_g1_i11	6282	1592	XP_021944904.1	XP_021944904.1 uncharacterized protein LOC110843250 [Folsomia candida]	DEAD-like_helicase_N superfamily	0	Folsomia candida	Arthropoda
TRINITY_DN5358_c0_g1_i11	6282	1592	XP_021964940.1	XP_021964940.1 uncharacterized protein LOC110860193 [Folsomia candida]	DEAD-like_helicase_N superfamily	0	Folsomia candida	Arthropoda
TRINITY_DN5358_c0_g1_i11	6282	1592	OXA41096.1	OXA41096.1 ATP-dependent DNA helicase PIF1 [Folsomia candida]	DEAD-like_helicase_N superfamily	0	Folsomia candida	Arthropoda
TRINITY_DN5358_c0_g1_i11	6282	1592	GCF53806.1	GCF53806.1 hypothetical protein parPi_0015747 [Paroedura picta]	DEAD-like_helicase_N superfamily	0	Paroedura picta	Chordata
TRINITY_DN5358_c0_g1_i11	6282	1592	XP_030050862.1	XP_030050862.1 uncharacterized protein LOC115464640 [Microcaecilia unicolor]	DEAD-like_helicase_N superfamily	0	Microcaecilia unicolor	Chordata
TRINITY_DN5358_c0_g1_i11	6282	1592	XP_030060875.1	XP_030060875.1 uncharacterized protein LOC115471313 [Microcaecilia unicolor]	DEAD-like_helicase_N superfamily	0	Microcaecilia unicolor	Chordata
TRINITY_DN5358_c0_g1_i11	6282	1592	XP_021967368.1	XP_021967368.1 uncharacterized protein LOC110862486 [Folsomia candida]	DEAD-like_helicase_N superfamily	0	Folsomia candida	Arthropoda
TRINITY_DN5358_c0_g1_i11	6282	1592	XP_021959549.1	XP_021959549.1 uncharacterized protein LOC110855449 [Folsomia candida]	DEAD-like_helicase_N superfamily	0	Folsomia candida	Arthropoda
TRINITY_DN5358_c0_g1_i11	6282	1592	XP_021958962.1	XP_021958962.1 uncharacterized protein LOC110854839 [Folsomia candida]	DEAD-like_helicase_N superfamily	0	Folsomia candida	Arthropoda
TRINITY_DN5358_c0_g1_i11	6282	1592	XP_021953552.1	XP_021953552.1 uncharacterized protein LOC110850428 [Folsomia candida]	DEAD-like_helicase_N superfamily	0	Folsomia candida	Arthropoda
TRINITY_DN5358_c0_g1_i11	6282	1592	XP_035713810.1	XP_035713810.1 uncharacterized protein LOC118438127 [Folsomia candida]	DEAD-like_helicase_N superfamily	0	Folsomia candida	Arthropoda
TRINITY_DN5358_c0_g1_i11	6282	1592	XP_021953640.1	XP_021953640.1 uncharacterized protein LOC110850511 [Folsomia candida]	DEAD-like_helicase_N superfamily	0	Folsomia candida	Arthropoda
TRINITY_DN5358_c0_g1_i11	6282	1592	XP_021963627.1	XP_021963627.1 uncharacterized protein LOC110859072 [Folsomia candida]	DEAD-like_helicase_N superfamily	0	Folsomia candida	Arthropoda
TRINITY_DN19360_c0_g2_i6	6185	1456	XP_040185825.1	XP_040185825.1 zinc finger MYM-type protein 1-like [Rana temporaria]	DUF4371 superfamily	6.21e-195	Rana temporaria	Chordata
TRINITY_DN19360_c0_g2_i6	6185	1456	XP_040264864.1	XP_040264864.1 zinc finger MYM-type protein 1-like [Bufo bufo]	DUF4371 superfamily	3.33e-194	Bufo bufo	Chordata
TRINITY_DN19360_c0_g2_i6	6185	1456	XP_040286084.1	XP_040286084.1 zinc finger MYM-type protein 1-like [Bufo bufo]	DUF4371 superfamily	8.96e-194	Bufo bufo	Chordata
TRINITY_DN19360_c0_g2_i6	6185	1456	XP_040275700.1	XP_040275700.1 zinc finger MYM-type protein 1-like [Bufo bufo]	DUF4371 superfamily	8.96e-194	Bufo bufo	Chordata
TRINITY_DN19360_c0_g2_i6	6185	1456	XP_040285838.1	XP_040285838.1 zinc finger MYM-type protein 1-like [Bufo bufo]	DUF4371 superfamily	1.25e-193	Bufo bufo	Chordata
TRINITY_DN19360_c0_g2_i6	6185	1456	XP_041439825.1	XP_041439825.1 zinc finger MYM-type protein 1-like [Xenopus laevis]	DUF4371 superfamily	1.34e-193	Xenopus laevis	Chordata
TRINITY_DN19360_c0_g2_i6	6185	1456	XP_040271600.1	XP_040271600.1 zinc finger MYM-type protein 1-like [Bufo bufo]	DUF4371 superfamily	1.68e-193	Bufo bufo	Chordata
TRINITY_DN19360_c0_g2_i6	6185	1456	XP_041437174.1	XP_041437174.1 zinc finger MYM-type protein 1-like [Xenopus laevis]	DUF4371 superfamily	3.72e-193	Xenopus laevis	Chordata
TRINITY_DN19360_c0_g2_i6	6185	1456	XP_040275816.1	XP_040275816.1 zinc finger MYM-type protein 1-like [Bufo bufo]	DUF4371 superfamily	2.42e-192	Bufo bufo	Chordata
TRINITY_DN19360_c0_g2_i6	6185	1456	XP_041434247.1	XP_041434247.1 zinc finger MYM-type protein 1-like [Xenopus laevis]	DUF4371 superfamily	3.74e-192	Xenopus laevis	Chordata
TRINITY_DN19360_c0_g2_i6	6185	1456	KAG8582256.1	KAG8582256.1 hypothetical protein GDO81_007971 [Engystomops pustulosus]	DUF4371 superfamily	1.51e-191	Engystomops pustulosus	Chordata
TRINITY_DN19360_c0_g2_i6	6185	1456	XP_040289897.1	XP_040289897.1 zinc finger MYM-type protein 1-like [Bufo bufo]	DUF4371 superfamily	3.37e-191	Bufo bufo	Chordata
TRINITY_DN19360_c0_g2_i6	6185	1456	XP_017948164.1	XP_017948164.1 zinc finger MYM-type protein 1 [Xenopus tropicalis]	DUF4371 superfamily	3.12e-190	Xenopus tropicalis	Chordata
TRINITY_DN19360_c0_g2_i6	6185	1456	XP_040271831.1	XP_040271831.1 zinc finger MYM-type protein 1-like [Bufo bufo]	DUF4371 superfamily	2.96e-189	Bufo bufo	Chordata
TRINITY_DN19360_c0_g2_i6	6185	1456	XP_029435922.1	XP_029435922.1 zinc finger MYM-type protein 1-like [Rhinatrema bivittatum]	DUF4371 superfamily	8.06e-189	Rhinatrema bivittatum	Chordata
TRINITY_DN19360_c0_g2_i6	6185	1456	XP_029466585.1	XP_029466585.1 zinc finger MYM-type protein 1-like [Rhinatrema bivittatum]	DUF4371 superfamily	1.15e-187	Rhinatrema bivittatum	Chordata
TRINITY_DN19360_c0_g2_i6	6185	1456	XP_029435762.1	XP_029435762.1 zinc finger MYM-type protein 1-like [Rhinatrema bivittatum]	DUF4371 superfamily	3.07e-186	Rhinatrema bivittatum	Chordata
TRINITY_DN19360_c0_g2_i6	6185	1456	KAG8444242.1	KAG8444242.1 hypothetical protein GDO86_009431 [Hymenochirus boettgeri]	DUF4371 superfamily	1.4e-184	Hymenochirus boettgeri	Chordata
TRINITY_DN19360_c0_g2_i6	6185	1456	XP_029434034.1	XP_029434034.1 zinc finger MYM-type protein 1-like [Rhinatrema bivittatum]	DUF4371 superfamily	3.17e-171	Rhinatrema bivittatum	Chordata
TRINITY_DN19360_c0_g2_i6	6185	1456	XP_025408958.1	XP_025408958.1 zinc finger MYM-type protein 1-like [Sipha flava]	DUF4371 superfamily	7.5e-167	Sipha flava	Arthropoda
TRINITY_DN933_c2_g1_i8	2395	1352	XP_008103963.1	XP_008103963.1 PREDICTED: jerky protein homolog-like isoform X2 [Anolis carolinensis]	rve superfamily	6.09e-249	Anolis carolinensis	Chordata
TRINITY_DN933_c2_g1_i8	2395	1352	XP_016847311.1	XP_016847311.1 PREDICTED: jerky protein homolog-like isoform X1 [Anolis carolinensis]	rve superfamily	8.94e-249	Anolis carolinensis	Chordata
TRINITY_DN933_c2_g1_i8	2395	1352	XP_008119844.1	XP_008119844.1 PREDICTED: jerky protein homolog-like [Anolis carolinensis]	rve superfamily	4.79e-240	Anolis carolinensis	Chordata
TRINITY_DN933_c2_g1_i8	2395	1352	XP_016846335.1	XP_016846335.1 PREDICTED: uncharacterized protein LOC103277513 [Anolis carolinensis]	rve superfamily	1.54e-233	Anolis carolinensis	Chordata
TRINITY_DN933_c2_g1_i8	2395	1352	XP_008119843.1	XP_008119843.1 PREDICTED: zinc finger protein with KRAB and SCAN domains 7 [Anolis carolinensis]	rve superfamily	2.46e-230	Anolis carolinensis	Chordata
TRINITY_DN933_c2_g1_i8	2395	1352	XP_028660410.1	XP_028660410.1 jerky protein homolog-like [Erpetoichthys calabaricus]	rve superfamily	1.03e-203	Erpetoichthys calabaricus	Chordata
TRINITY_DN933_c2_g1_i8	2395	1352	XP_028659020.1	XP_028659020.1 jerky protein homolog-like [Erpetoichthys calabaricus]	rve superfamily	6.8e-199	Erpetoichthys calabaricus	Chordata
TRINITY_DN933_c2_g1_i8	2395	1352	XP_042315488.1	XP_042315488.1 jerky protein homolog-like [Sceloporus undulatus]	rve superfamily	1.1e-196	Sceloporus undulatus	Chordata
TRINITY_DN933_c2_g1_i8	2395	1352	XP_023231971.1	XP_023231971.1 jerky protein homolog-like [Centruroides sculpturatus]	rve superfamily	6.97e-183	Centruroides sculpturatus	Arthropoda
TRINITY_DN933_c2_g1_i8	2395	1352	KAF7249719.1	KAF7249719.1 Plexin-D1 [Varanus komodoensis]	rve superfamily	3.72e-172	Varanus komodoensis	Chordata
TRINITY_DN933_c2_g1_i8	2395	1352	GFU88659.1	GFU88659.1 jerky protein homolog-like [Trichonephila clavipes]	rve superfamily	3.86e-164	Trichonephila clavipes	Arthropoda
TRINITY_DN933_c2_g1_i8	2395	1352	XP_011861520.1	XP_011861520.1 PREDICTED: jerky protein homolog-like isoform X1 [Vollenhovia emeryi]	rve superfamily	6.78e-163	Vollenhovia emeryi	Arthropoda
TRINITY_DN933_c2_g1_i8	2395	1352	XP_029173702.1	XP_029173702.1 jerky protein homolog-like [Nylanderia fulva]	rve superfamily	1.08e-161	Nylanderia fulva	Arthropoda
TRINITY_DN933_c2_g1_i8	2395	1352	GFR09827.1	GFR09827.1 jerky protein homolog-like [Trichonephila clavata]	rve superfamily	1.38e-161	Trichonephila clavata	Arthropoda
TRINITY_DN933_c2_g1_i8	2395	1352	XP_042295721.1	XP_042295721.1 jerky protein homolog-like [Sceloporus undulatus]	rve superfamily	1.27e-160	Sceloporus undulatus	Chordata
TRINITY_DN933_c2_g1_i8	2395	1352	XP_015928749.1	XP_015928749.1 jerky protein homolog-like [Parasteatoda tepidariorum]	rve superfamily	1.78e-156	Parasteatoda tepidariorum	Arthropoda
TRINITY_DN933_c2_g1_i8	2395	1352	GFS84640.1	GFS84640.1 jerky protein homolog-like [Trichonephila clavipes]	rve superfamily	6.32e-151	Trichonephila clavipes	Arthropoda
TRINITY_DN933_c2_g1_i8	2395	1352	GFW28295.1	GFW28295.1 jerky protein homolog-like [Trichonephila clavipes]	rve superfamily	8.35e-151	Trichonephila clavipes	Arthropoda
TRINITY_DN933_c2_g1_i8	2395	1352	GFT00658.1	GFT00658.1 jerky protein homolog-like [Trichonephila clavipes]	rve superfamily	4.69e-150	Trichonephila clavipes	Arthropoda
TRINITY_DN933_c2_g1_i8	2395	1352	XP_029176761.1	XP_029176761.1 jerky protein homolog-like [Nylanderia fulva]	rve superfamily	7.43e-148	Nylanderia fulva	Arthropoda
TRINITY_DN35_c0_g1_i25	453	1212	AAA49129.1	AAA49129.1 ubiquitin polyprotein (heat shock related), partial [Gallus gallus]	Ubl_ubiquitin	4e-101	Gallus gallus	Chordata
TRINITY_DN35_c0_g1_i25	453	1212	BAC56534.1	BAC56534.1 similar to polyubiquitin, partial [Bos taurus]	Ubl_ubiquitin	4e-101	Bos taurus	Chordata
TRINITY_DN35_c0_g1_i25	453	1212	NXO72888.1	NXO72888.1 UBIQP protein [Phainopepla nitens]	Ubl_ubiquitin	4.59e-101	Phainopepla nitens	Chordata
TRINITY_DN35_c0_g1_i25	453	1212	NXQ40174.1	NXQ40174.1 UBIQP protein [Catharus fuscescens]	Ubl_ubiquitin	4.59e-101	Catharus fuscescens	Chordata
TRINITY_DN35_c0_g1_i25	453	1212	NWV46720.1	NWV46720.1 UBIQP protein [Daphoenositta chrysoptera]	Ubl_ubiquitin	5.09e-101	Daphoenositta chrysoptera	Chordata
TRINITY_DN35_c0_g1_i25	453	1212	AAA30720.1	AAA30720.1 polyubiquitin, partial [Bos taurus]	Ubl_ubiquitin	5.09e-101	Bos taurus	Chordata
TRINITY_DN35_c0_g1_i25	453	1212	XP_026715764.1	XP_026715764.1 polyubiquitin, partial [Athene cunicularia]	Ubl_ubiquitin	5.27e-101	Athene cunicularia	Chordata
TRINITY_DN35_c0_g1_i25	453	1212	NXO98119.1	NXO98119.1 UBIQP protein [Certhia brachydactyla]	Ubl_ubiquitin	5.45e-101	Certhia brachydactyla	Chordata
TRINITY_DN35_c0_g1_i25	453	1212	CAF5094079.1	CAF5094079.1 unnamed protein product, partial [Rotaria sp. Silwood1]	Ubl_ubiquitin	5.45e-101	Rotaria sp. Silwood1	Rotifera
TRINITY_DN35_c0_g1_i25	453	1212	P62972.2	P62972.2 RecName: Full=Polyubiquitin; Contains: RecName: Full=Ubiquitin; Flags: Precursor [Xenopus laevis]	Ubl_ubiquitin	5.64e-101	Xenopus laevis	Chordata
TRINITY_DN35_c0_g1_i25	453	1212	NWW61695.1	NWW61695.1 UBIQP protein [Ifrita kowaldi]	Ubl_ubiquitin	6.05e-101	Ifrita kowaldi	Chordata
TRINITY_DN35_c0_g1_i25	453	1212	NXT92712.1	NXT92712.1 UBB protein [Anhinga rufa]	Ubl_ubiquitin	6.71e-101	Anhinga rufa	Chordata
TRINITY_DN35_c0_g1_i25	453	1212	WP_219963587.1	WP_219963587.1 ubiquitin family protein, partial [Streptomyces sp. SMS_SU21]	Ubl_ubiquitin	7.19e-101	Streptomyces sp. SMS_SU21	Actinobacteria
TRINITY_DN35_c0_g1_i25	453	1212	NXI49552.1	NXI49552.1 UBB protein [Chloroceryle aenea]	Ubl_ubiquitin	7.7e-101	Chloroceryle aenea	Chordata
TRINITY_DN35_c0_g1_i25	453	1212	XP_009983603.1	XP_009983603.1 PREDICTED: polyubiquitin isoform X14 [Tauraco erythrolophus]	Ubl_ubiquitin	8.25e-101	Tauraco erythrolophus	Chordata
TRINITY_DN35_c0_g1_i25	453	1212	NXN81308.1	NXN81308.1 UBB protein [Bombycilla garrulus]	Ubl_ubiquitin	9.81e-101	Bombycilla garrulus	Chordata
TRINITY_DN35_c0_g1_i25	453	1212	KFP50091.1	KFP50091.1 Polyubiquitin-B, partial [Cathartes aura]	Ubl_ubiquitin	9.81e-101	Cathartes aura	Chordata
TRINITY_DN35_c0_g1_i25	453	1212	KFP74355.1	KFP74355.1 Polyubiquitin, partial [Apaloderma vittatum]	Ubl_ubiquitin	1.13e-100	Apaloderma vittatum	Chordata
TRINITY_DN35_c0_g1_i25	453	1212	NXQ29558.1	NXQ29558.1 UBB protein [Alaudala cheleensis]	Ubl_ubiquitin	1.29e-100	Alaudala cheleensis	Chordata
TRINITY_DN35_c0_g1_i25	453	1212	AAV84266.1	AAV84266.1 ubiquitin, partial [Culicoides sonorensis]	Ubl_ubiquitin	1.29e-100	Culicoides sonorensis	Arthropoda
TRINITY_DN41539_c0_g2_i1	1810	1180	KAG8278943.1	KAG8278943.1 Tubulin alpha-4A chain [Homalodisca vitripennis]	alpha_tubulin	2.9e-245	Homalodisca vitripennis	Arthropoda
TRINITY_DN41539_c0_g2_i1	1810	1180	NXT32144.1	NXT32144.1 TBA1C protein [Pelecanoides urinatrix]	alpha_tubulin	2.07e-220	Pelecanoides urinatrix	Chordata
TRINITY_DN41539_c0_g2_i1	1810	1180	NWH20675.1	NWH20675.1 TBA1C protein [Grus americana]	alpha_tubulin	4.15e-220	Grus americana	Chordata
TRINITY_DN41539_c0_g2_i1	1810	1180	NXE76512.1	NXE76512.1 TBA protein [Cochlearius cochlearius]	alpha_tubulin	8.36e-220	Cochlearius cochlearius	Chordata
TRINITY_DN41539_c0_g2_i1	1810	1180	XP_006035366.1	XP_006035366.1 tubulin alpha-3 chain-like isoform X1 [Alligator sinensis]	alpha_tubulin	9.32e-220	Alligator sinensis	Chordata
TRINITY_DN41539_c0_g2_i1	1810	1180	NXL48461.1	NXL48461.1 TBA1C protein [Podilymbus podiceps]	alpha_tubulin	1.19e-219	Podilymbus podiceps	Chordata
TRINITY_DN41539_c0_g2_i1	1810	1180	NXX58924.1	NXX58924.1 TBA1C protein [Scopus umbretta]	alpha_tubulin	2.39e-219	Scopus umbretta	Chordata
TRINITY_DN41539_c0_g2_i1	1810	1180	NXU28806.1	NXU28806.1 TBA1C protein [Thalassarche chlororhynchos]	alpha_tubulin	4.15e-219	Thalassarche chlororhynchos	Chordata
TRINITY_DN41539_c0_g2_i1	1810	1180	NXO48722.1	NXO48722.1 TBA1C protein [Aramus guarauna]	alpha_tubulin	4.15e-219	Aramus guarauna	Chordata
TRINITY_DN41539_c0_g2_i1	1810	1180	XP_019633785.1	XP_019633785.1 PREDICTED: tubulin alpha-8 chain-like [Branchiostoma belcheri]	alpha_tubulin	6.19e-219	Branchiostoma belcheri	Chordata
TRINITY_DN41539_c0_g2_i1	1810	1180	XP_035676508.1	XP_035676508.1 tubulin alpha-8 chain-like isoform X2 [Branchiostoma floridae]	alpha_tubulin	6.19e-219	Branchiostoma floridae	Chordata
TRINITY_DN41539_c0_g2_i1	1810	1180	NXX50816.1	NXX50816.1 TBA1C protein [Tricholaema leucomelas]	alpha_tubulin	6.81e-219	Tricholaema leucomelas	Chordata
TRINITY_DN41539_c0_g2_i1	1810	1180	XP_035676507.1	XP_035676507.1 tubulin alpha-8 chain-like isoform X1 [Branchiostoma floridae]	alpha_tubulin	6.99e-219	Branchiostoma floridae	Chordata
TRINITY_DN41539_c0_g2_i1	1810	1180	NWU54518.1	NWU54518.1 TBA4A protein [Dromas ardeola]	alpha_tubulin	7.42e-219	Dromas ardeola	Chordata
TRINITY_DN41539_c0_g2_i1	1810	1180	KFP42342.1	KFP42342.1 Tubulin alpha chain, partial [Chlamydotis macqueenii]	alpha_tubulin	8.35e-219	Chlamydotis macqueenii	Chordata
TRINITY_DN41539_c0_g2_i1	1810	1180	NWH48966.1	NWH48966.1 TBA1C protein [Fregata magnificens]	alpha_tubulin	8.35e-219	Fregata magnificens	Chordata
TRINITY_DN41539_c0_g2_i1	1810	1180	NXH67730.1	NXH67730.1 TBA1C protein [Oceanodroma tethys]	alpha_tubulin	8.35e-219	Oceanodroma tethys	Chordata
TRINITY_DN41539_c0_g2_i1	1810	1180	NWQ88368.1	NWQ88368.1 TBA1C protein [Burhinus bistriatus]	alpha_tubulin	9.65e-219	Burhinus bistriatus	Chordata
TRINITY_DN41539_c0_g2_i1	1810	1180	NWI10170.1	NWI10170.1 TBA1C protein [Crypturellus soui]	alpha_tubulin	1.05e-218	Crypturellus soui	Chordata
TRINITY_DN41539_c0_g2_i1	1810	1180	NXC68573.1	NXC68573.1 TBA protein [Anhinga anhinga]	alpha_tubulin	1.37e-218	Anhinga anhinga	Chordata
TRINITY_DN11085_c0_g1_i1	793	1142	XP_036253347.1	XP_036253347.1 layilin isoform X1 [Molothrus ater]	CLECT	2.07e-11	Molothrus ater	Chordata
TRINITY_DN11085_c0_g1_i1	793	1142	NXI12433.1	NXI12433.1 LAYN protein [Irena cyanogastra]	CLECT	3.32e-11	Irena cyanogastra	Chordata
TRINITY_DN11085_c0_g1_i1	793	1142	XP_029139925.1	XP_029139925.1 hepatic lectin-like [Protobothrops mucrosquamatus]	CLECT	5.21e-11	Protobothrops mucrosquamatus	Chordata
TRINITY_DN11085_c0_g1_i1	793	1142	NXG17265.1	NXG17265.1 LAYN protein [Grallaria varia]	CLECT	1.11e-10	Grallaria varia	Chordata
TRINITY_DN11085_c0_g1_i1	793	1142	NWW12832.1	NWW12832.1 LAYN protein [Oreocharis arfaki]	CLECT	1.14e-10	Oreocharis arfaki	Chordata
TRINITY_DN11085_c0_g1_i1	793	1142	KAF2977005.1	KAF2977005.1 hypothetical protein EK904_013660 [Melospiza melodia maxima]	CLECT	1.17e-10	Melospiza melodia maxima	Chordata
TRINITY_DN11085_c0_g1_i1	793	1142	XP_036253348.1	XP_036253348.1 layilin isoform X2 [Molothrus ater]	CLECT	1.25e-10	Molothrus ater	Chordata
TRINITY_DN11085_c0_g1_i1	793	1142	NWU36554.1	NWU36554.1 LAYN protein [Hylia prasina]	CLECT	1.55e-10	Hylia prasina	Chordata
TRINITY_DN11085_c0_g1_i1	793	1142	XP_014129356.1	XP_014129356.1 layilin [Zonotrichia albicollis]	CLECT	1.71e-10	Zonotrichia albicollis	Chordata
TRINITY_DN11085_c0_g1_i1	793	1142	NXF26669.1	NXF26669.1 LAYN protein [Rhodinocichla rosea]	CLECT	2.14e-10	Rhodinocichla rosea	Chordata
TRINITY_DN11085_c0_g1_i1	793	1142	XP_019144000.1	XP_019144000.1 layilin isoform X3 [Corvus cornix cornix]	CLECT	2.22e-10	Corvus kubaryi;Corvus cornix cornix	Chordata
TRINITY_DN11085_c0_g1_i1	793	1142	XP_031989850.1	XP_031989850.1 layilin isoform X4 [Corvus moneduloides]	CLECT	2.22e-10	Corvus moneduloides	Chordata
TRINITY_DN11085_c0_g1_i1	793	1142	XP_031989849.1	XP_031989849.1 layilin isoform X3 [Corvus moneduloides]	CLECT	2.43e-10	Corvus moneduloides	Chordata
TRINITY_DN11085_c0_g1_i1	793	1142	XP_010402145.1	XP_010402145.1 layilin isoform X1 [Corvus cornix cornix]	CLECT	3.27e-10	Corvus cornix cornix	Chordata
TRINITY_DN11085_c0_g1_i1	793	1142	XP_031989847.1	XP_031989847.1 layilin isoform X1 [Corvus moneduloides]	CLECT	3.27e-10	Corvus moneduloides	Chordata
TRINITY_DN11085_c0_g1_i1	793	1142	XP_041890164.1	XP_041890164.1 layilin isoform X1 [Corvus kubaryi]	CLECT	3.27e-10	Corvus kubaryi	Chordata
TRINITY_DN11085_c0_g1_i1	793	1142	NWZ09547.1	NWZ09547.1 LAYN protein [Agelaius phoeniceus]	CLECT	5.28e-10	Agelaius phoeniceus	Chordata
TRINITY_DN11085_c0_g1_i1	793	1142	NXQ55505.1	NXQ55505.1 LAYN protein [Anthoscopus minutus]	CLECT	5.28e-10	Anthoscopus minutus	Chordata
TRINITY_DN11085_c0_g1_i1	793	1142	NWY14986.1	NWY14986.1 LAYN protein [Aphelocoma coerulescens]	CLECT	5.33e-10	Aphelocoma coerulescens	Chordata
TRINITY_DN11085_c0_g1_i1	793	1142	NXI77814.1	NXI77814.1 LAYN protein [Rhipidura dahli]	CLECT	7.01e-10	Rhipidura dahli	Chordata
TRINITY_DN933_c2_g1_i2	894	1090	XP_008119844.1	XP_008119844.1 PREDICTED: jerky protein homolog-like [Anolis carolinensis]	#N/A	8.48e-33	Anolis carolinensis	Chordata
TRINITY_DN933_c2_g1_i2	894	1090	XP_028142599.1	XP_028142599.1 uncharacterized protein LOC114336436 [Diabrotica virgifera virgifera]	#N/A	1.62e-32	Diabrotica virgifera virgifera	Arthropoda
TRINITY_DN933_c2_g1_i2	894	1090	XP_008119843.1	XP_008119843.1 PREDICTED: zinc finger protein with KRAB and SCAN domains 7 [Anolis carolinensis]	#N/A	1.66e-32	Anolis carolinensis	Chordata
TRINITY_DN933_c2_g1_i2	894	1090	XP_008103963.1	XP_008103963.1 PREDICTED: jerky protein homolog-like isoform X2 [Anolis carolinensis]	#N/A	2.61e-32	Anolis carolinensis	Chordata
TRINITY_DN933_c2_g1_i2	894	1090	XP_016847311.1	XP_016847311.1 PREDICTED: jerky protein homolog-like isoform X1 [Anolis carolinensis]	#N/A	2.72e-32	Anolis carolinensis	Chordata
TRINITY_DN933_c2_g1_i2	894	1090	XP_016846335.1	XP_016846335.1 PREDICTED: uncharacterized protein LOC103277513 [Anolis carolinensis]	#N/A	1.11e-31	Anolis carolinensis	Chordata
TRINITY_DN933_c2_g1_i2	894	1090	XP_028660410.1	XP_028660410.1 jerky protein homolog-like [Erpetoichthys calabaricus]	#N/A	2.12e-24	Erpetoichthys calabaricus	Chordata
TRINITY_DN933_c2_g1_i2	894	1090	XP_042315488.1	XP_042315488.1 jerky protein homolog-like [Sceloporus undulatus]	#N/A	7.54e-23	Sceloporus undulatus	Chordata
TRINITY_DN933_c2_g1_i2	894	1090	XP_012221253.1	XP_012221253.1 PREDICTED: jerky protein homolog-like [Linepithema humile]	#N/A	3.65e-20	Linepithema humile	Arthropoda
TRINITY_DN933_c2_g1_i2	894	1090	XP_011861520.1	XP_011861520.1 PREDICTED: jerky protein homolog-like isoform X1 [Vollenhovia emeryi]	#N/A	3.32e-19	Vollenhovia emeryi	Arthropoda
TRINITY_DN933_c2_g1_i2	894	1090	XP_029176761.1	XP_029176761.1 jerky protein homolog-like [Nylanderia fulva]	#N/A	1.72e-18	Nylanderia fulva	Arthropoda
TRINITY_DN933_c2_g1_i2	894	1090	XP_029173702.1	XP_029173702.1 jerky protein homolog-like [Nylanderia fulva]	#N/A	6.62e-16	Nylanderia fulva	Arthropoda
TRINITY_DN933_c2_g1_i2	894	1090	XP_042295721.1	XP_042295721.1 jerky protein homolog-like [Sceloporus undulatus]	#N/A	1.4e-15	Sceloporus undulatus	Chordata
TRINITY_DN933_c2_g1_i2	894	1090	PSN50338.1	PSN50338.1 Jerky-like protein [Blattella germanica]	#N/A	5.93e-15	Blattella germanica	Arthropoda
TRINITY_DN933_c2_g1_i2	894	1090	XP_006130857.1	XP_006130857.1 jerky protein homolog-like [Pelodiscus sinensis]	#N/A	6.54e-15	Pelodiscus sinensis	Chordata
TRINITY_DN933_c2_g1_i2	894	1090	PSN30710.1	PSN30710.1 Jerky-like protein [Blattella germanica]	#N/A	8.12e-15	Blattella germanica	Arthropoda
TRINITY_DN933_c2_g1_i2	894	1090	XP_028149043.1	XP_028149043.1 jerky protein homolog-like [Diabrotica virgifera virgifera]	#N/A	8.83e-15	Diabrotica virgifera virgifera	Arthropoda
TRINITY_DN933_c2_g1_i2	894	1090	KAF7249719.1	KAF7249719.1 Plexin-D1 [Varanus komodoensis]	#N/A	1.67e-14	Varanus komodoensis	Chordata
TRINITY_DN933_c2_g1_i2	894	1090	KAG8182523.1	KAG8182523.1 hypothetical protein JTE90_002061 [Oedothorax gibbosus]	#N/A	2.79e-14	Oedothorax gibbosus	Arthropoda
TRINITY_DN933_c2_g1_i2	894	1090	GBM49349.1	GBM49349.1 Jerky -like [Araneus ventricosus]	#N/A	3.67e-14	Araneus ventricosus	Arthropoda
TRINITY_DN3289_c0_g1_i3	2488	1032	XP_028664086.1	XP_028664086.1 jerky protein homolog-like [Erpetoichthys calabaricus]	rve superfamily	1.9e-240	Erpetoichthys calabaricus	Chordata
TRINITY_DN3289_c0_g1_i3	2488	1032	XP_028681081.1	XP_028681081.1 jerky protein homolog-like [Erpetoichthys calabaricus]	rve superfamily	1.76e-238	Erpetoichthys calabaricus	Chordata
TRINITY_DN3289_c0_g1_i3	2488	1032	XP_028674359.1	XP_028674359.1 jerky protein homolog-like [Erpetoichthys calabaricus]	rve superfamily	5.2e-238	Erpetoichthys calabaricus	Chordata
TRINITY_DN3289_c0_g1_i3	2488	1032	XP_039618076.1	XP_039618076.1 jerky protein homolog-like [Polypterus senegalus]	rve superfamily	7.11e-238	Polypterus senegalus	Chordata
TRINITY_DN3289_c0_g1_i3	2488	1032	XP_028674343.1	XP_028674343.1 jerky protein homolog-like [Erpetoichthys calabaricus]	rve superfamily	1.43e-237	Erpetoichthys calabaricus	Chordata
TRINITY_DN3289_c0_g1_i3	2488	1032	XP_028660442.1	XP_028660442.1 jerky protein homolog-like [Erpetoichthys calabaricus]	rve superfamily	5.75e-237	Erpetoichthys calabaricus	Chordata
TRINITY_DN3289_c0_g1_i3	2488	1032	XP_028648386.1	XP_028648386.1 jerky protein homolog-like [Erpetoichthys calabaricus]	rve superfamily	2.24e-236	Erpetoichthys calabaricus	Chordata
TRINITY_DN3289_c0_g1_i3	2488	1032	XP_028649035.1	XP_028649035.1 jerky protein homolog-like [Erpetoichthys calabaricus]	rve superfamily	8.69e-236	Erpetoichthys calabaricus	Chordata
TRINITY_DN3289_c0_g1_i3	2488	1032	XP_028672775.1	XP_028672775.1 jerky protein homolog-like [Erpetoichthys calabaricus]	rve superfamily	2.66e-235	Erpetoichthys calabaricus	Chordata
TRINITY_DN3289_c0_g1_i3	2488	1032	XP_028654628.1	XP_028654628.1 jerky protein homolog-like [Erpetoichthys calabaricus]	rve superfamily	4.31e-234	Erpetoichthys calabaricus	Chordata
TRINITY_DN3289_c0_g1_i3	2488	1032	XP_028674275.1	XP_028674275.1 jerky protein homolog-like [Erpetoichthys calabaricus]	rve superfamily	6.11e-234	Erpetoichthys calabaricus	Chordata
TRINITY_DN3289_c0_g1_i3	2488	1032	XP_028665335.1	XP_028665335.1 jerky protein homolog-like [Erpetoichthys calabaricus]	rve superfamily	2.82e-232	Erpetoichthys calabaricus	Chordata
TRINITY_DN3289_c0_g1_i3	2488	1032	XP_028669261.1	XP_028669261.1 jerky protein homolog-like [Erpetoichthys calabaricus]	rve superfamily	8.21e-228	Erpetoichthys calabaricus	Chordata
TRINITY_DN3289_c0_g1_i3	2488	1032	XP_039613929.1	XP_039613929.1 jerky protein homolog-like [Polypterus senegalus]	rve superfamily	1.63e-215	Polypterus senegalus	Chordata
TRINITY_DN3289_c0_g1_i3	2488	1032	XP_039608836.1	XP_039608836.1 jerky protein homolog-like [Polypterus senegalus]	rve superfamily	8.48e-208	Polypterus senegalus	Chordata
TRINITY_DN3289_c0_g1_i3	2488	1032	GFS84640.1	GFS84640.1 jerky protein homolog-like [Trichonephila clavipes]	rve superfamily	1.24e-206	Trichonephila clavipes	Arthropoda
TRINITY_DN3289_c0_g1_i3	2488	1032	GFW28295.1	GFW28295.1 jerky protein homolog-like [Trichonephila clavipes]	rve superfamily	4.25e-204	Trichonephila clavipes	Arthropoda
TRINITY_DN3289_c0_g1_i3	2488	1032	XP_028666359.1	XP_028666359.1 jerky protein homolog-like [Erpetoichthys calabaricus]	rve superfamily	1.4e-203	Erpetoichthys calabaricus	Chordata
TRINITY_DN3289_c0_g1_i3	2488	1032	KAG2469150.1	KAG2469150.1 JERKL protein, partial [Polypterus senegalus]	rve superfamily	4.67e-202	Polypterus senegalus	Chordata
TRINITY_DN3289_c0_g1_i3	2488	1032	XP_028676127.1	XP_028676127.1 jerky protein homolog-like [Erpetoichthys calabaricus]	rve superfamily	2.4e-199	Erpetoichthys calabaricus	Chordata
TRINITY_DN15971_c0_g4_i1	4269	878	XP_008120491.1	XP_008120491.1 PREDICTED: zinc finger MYM-type protein 1 [Anolis carolinensis]	DUF4371 superfamily	0	Anolis carolinensis	Chordata
TRINITY_DN15971_c0_g4_i1	4269	878	XP_016850957.1	XP_016850957.1 PREDICTED: zinc finger MYM-type protein 1-like [Anolis carolinensis]	DUF4371 superfamily	0	Anolis carolinensis	Chordata
TRINITY_DN15971_c0_g4_i1	4269	878	XP_016854909.1	XP_016854909.1 PREDICTED: zinc finger MYM-type protein 1-like [Anolis carolinensis]	DUF4371 superfamily	0	Anolis carolinensis	Chordata
TRINITY_DN15971_c0_g4_i1	4269	878	XP_008122104.2	XP_008122104.2 PREDICTED: zinc finger MYM-type protein 1 isoform X1 [Anolis carolinensis]	DUF4371 superfamily	0	Anolis carolinensis	Chordata
TRINITY_DN15971_c0_g4_i1	4269	878	XP_008122105.2	XP_008122105.2 PREDICTED: zinc finger MYM-type protein 1 isoform X2 [Anolis carolinensis]	DUF4371 superfamily	0	Anolis carolinensis	Chordata
TRINITY_DN15971_c0_g4_i1	4269	878	XP_008113471.1	XP_008113471.1 PREDICTED: zinc finger MYM-type protein 1-like [Anolis carolinensis]	DUF4371 superfamily	0	Anolis carolinensis	Chordata
TRINITY_DN15971_c0_g4_i1	4269	878	XP_003216573.1	XP_003216573.1 PREDICTED: zinc finger MYM-type protein 1-like [Anolis carolinensis]	DUF4371 superfamily	0	Anolis carolinensis	Chordata
TRINITY_DN15971_c0_g4_i1	4269	878	XP_008123338.1	XP_008123338.1 PREDICTED: zinc finger MYM-type protein 1-like [Anolis carolinensis]	DUF4371 superfamily	0	Anolis carolinensis	Chordata
TRINITY_DN15971_c0_g4_i1	4269	878	XP_008106930.1	XP_008106930.1 PREDICTED: zinc finger MYM-type protein 1-like [Anolis carolinensis]	DUF4371 superfamily	1.28e-283	Anolis carolinensis	Chordata
TRINITY_DN15971_c0_g4_i1	4269	878	XP_016846904.1	XP_016846904.1 PREDICTED: zinc finger MYM-type protein 1-like [Anolis carolinensis]	DUF4371 superfamily	1.85e-240	Anolis carolinensis	Chordata
TRINITY_DN15971_c0_g4_i1	4269	878	KAG6438818.1	KAG6438818.1 hypothetical protein O3G_MSEX000250 [Manduca sexta]	DUF4371 superfamily	1.27e-238	Manduca sexta	Arthropoda
TRINITY_DN15971_c0_g4_i1	4269	878	XP_025997681.2	XP_025997681.2 zinc finger MYM-type protein 1 [Solenopsis invicta]	DUF4371 superfamily	4.01e-236	Solenopsis invicta	Arthropoda
TRINITY_DN15971_c0_g4_i1	4269	878	XP_016852373.1	XP_016852373.1 PREDICTED: zinc finger MYM-type protein 1-like [Anolis carolinensis]	DUF4371 superfamily	1.29e-234	Anolis carolinensis	Chordata
TRINITY_DN15971_c0_g4_i1	4269	878	XP_008116309.2	XP_008116309.2 PREDICTED: uncharacterized protein LOC103280141 [Anolis carolinensis]	DUF4371 superfamily	1.28e-232	Anolis carolinensis	Chordata
TRINITY_DN15971_c0_g4_i1	4269	878	XP_040271776.1	XP_040271776.1 zinc finger MYM-type protein 1-like [Bufo bufo]	DUF4371 superfamily	1.17e-225	Bufo bufo	Chordata
TRINITY_DN15971_c0_g4_i1	4269	878	XP_040294291.1	XP_040294291.1 zinc finger MYM-type protein 1-like [Bufo bufo]	DUF4371 superfamily	3.28e-225	Bufo bufo	Chordata
TRINITY_DN15971_c0_g4_i1	4269	878	XP_012269674.2	XP_012269674.2 zinc finger MYM-type protein 1-like [Athalia rosae]	DUF4371 superfamily	4.17e-223	Athalia rosae	Arthropoda
TRINITY_DN15971_c0_g4_i1	4269	878	XP_032997453.1	XP_032997453.1 zinc finger MYM-type protein 1-like [Lacerta agilis]	DUF4371 superfamily	1.03e-222	Lacerta agilis	Chordata
TRINITY_DN15971_c0_g4_i1	4269	878	XP_022166116.1	XP_022166116.1 zinc finger MYM-type protein 1-like [Myzus persicae]	DUF4371 superfamily	2.45e-217	Myzus persicae	Arthropoda
TRINITY_DN15971_c0_g4_i1	4269	878	XP_002163005.2	XP_002163005.2 PREDICTED: zinc finger MYM-type protein 1-like [Hydra vulgaris]	DUF4371 superfamily	4.84e-213	Hydra vulgaris	Cnidaria
TRINITY_DN20494_c0_g2_i1	3569	820	XP_030052859.1	XP_030052859.1 glutaryl-CoA dehydrogenase, mitochondrial [Microcaecilia unicolor]	GCD	1.63e-200	Microcaecilia unicolor	Chordata
TRINITY_DN20494_c0_g2_i1	3569	820	NP_001086623.1	NP_001086623.1 glutaryl-CoA dehydrogenase L homeolog [Xenopus laevis]	GCD	2.61e-199	Xenopus laevis	Chordata
TRINITY_DN20494_c0_g2_i1	3569	820	XP_041099407.1	XP_041099407.1 glutaryl-CoA dehydrogenase a [Polyodon spathula]	GCD	1.88e-198	Polyodon spathula	Chordata
TRINITY_DN20494_c0_g2_i1	3569	820	XP_040202422.1	XP_040202422.1 glutaryl-CoA dehydrogenase, mitochondrial isoform X2 [Rana temporaria]	GCD	1.88e-198	Rana temporaria	Chordata
TRINITY_DN20494_c0_g2_i1	3569	820	XP_040202421.1	XP_040202421.1 glutaryl-CoA dehydrogenase, mitochondrial isoform X1 [Rana temporaria]	GCD	2.91e-198	Rana temporaria	Chordata
TRINITY_DN20494_c0_g2_i1	3569	820	KPP70418.1	KPP70418.1 glutaryl-CoA dehydrogenase-like [Scleropages formosus]	GCD	1.35e-197	Scleropages formosus	Chordata
TRINITY_DN20494_c0_g2_i1	3569	820	MBN3289315.1	MBN3289315.1 GCDH protein [Polypterus senegalus]	GCD	1.38e-197	Polypterus senegalus	Chordata
TRINITY_DN20494_c0_g2_i1	3569	820	CAB3360641.1	CAB3360641.1 Hypothetical predicted protein [Cloeon dipterum]	GCD	1.49e-197	Cloeon dipterum	Arthropoda
TRINITY_DN20494_c0_g2_i1	3569	820	XP_018593902.1	XP_018593902.1 glutaryl-CoA dehydrogenase, mitochondrial [Scleropages formosus]	GCD	2.46e-197	Scleropages formosus	Chordata
TRINITY_DN20494_c0_g2_i1	3569	820	RZF42405.1	RZF42405.1 hypothetical protein LSTR_LSTR004213 [Laodelphax striatellus]	GCD	3.55e-197	Laodelphax striatellus	Arthropoda
TRINITY_DN20494_c0_g2_i1	3569	820	XP_041943130.1	XP_041943130.1 glutaryl-CoA dehydrogenase b [Alosa sapidissima]	GCD	4.73e-197	Alosa sapidissima	Chordata
TRINITY_DN20494_c0_g2_i1	3569	820	XP_023703361.1	XP_023703361.1 glutaryl-CoA dehydrogenase, mitochondrial isoform X1 [Cryptotermes secundus]	GCD	5.89e-197	Cryptotermes secundus	Arthropoda
TRINITY_DN20494_c0_g2_i1	3569	820	XP_006005230.2	XP_006005230.2 PREDICTED: glutaryl-CoA dehydrogenase, mitochondrial [Latimeria chalumnae]	GCD	6.68e-197	Latimeria chalumnae	Chordata
TRINITY_DN20494_c0_g2_i1	3569	820	XP_042238009.1	XP_042238009.1 glutaryl-CoA dehydrogenase, mitochondrial-like [Homarus americanus]	GCD	8.45e-197	Homarus americanus	Arthropoda
TRINITY_DN20494_c0_g2_i1	3569	820	NP_001016289.1	NP_001016289.1 glutaryl-CoA dehydrogenase, mitochondrial [Xenopus tropicalis]	GCD	9.08e-197	Xenopus tropicalis	Chordata
TRINITY_DN20494_c0_g2_i1	3569	820	XP_026070112.1	XP_026070112.1 glutaryl-CoA dehydrogenase, mitochondrial-like isoform X2 [Carassius auratus]	GCD	1.15e-196	Carassius auratus	Chordata
TRINITY_DN20494_c0_g2_i1	3569	820	XP_026070110.1	XP_026070110.1 glutaryl-CoA dehydrogenase, mitochondrial-like isoform X1 [Carassius auratus]	GCD	1.24e-196	Carassius auratus	Chordata
TRINITY_DN20494_c0_g2_i1	3569	820	AAI35459.1	AAI35459.1 glutaryl-Coenzyme A dehydrogenase [Xenopus tropicalis]	GCD	1.28e-196	Xenopus tropicalis	Chordata
TRINITY_DN20494_c0_g2_i1	3569	820	XP_029996113.1	XP_029996113.1 glutaryl-CoA dehydrogenase, mitochondrial [Sphaeramia orbicularis]	GCD	2.01e-196	Sphaeramia orbicularis	Chordata
TRINITY_DN20494_c0_g2_i1	3569	820	XP_026113391.1	XP_026113391.1 glutaryl-CoA dehydrogenase, mitochondrial-like [Carassius auratus]	GCD	2.46e-196	Carassius auratus	Chordata
TRINITY_DN6309_c0_g1_i2	1055	766	XP_006988483.1	XP_006988483.1 S-formylglutathione hydrolase isoform X2 [Peromyscus maniculatus bairdii]	Abhydrolase superfamily	4.24e-149	Peromyscus maniculatus bairdii	Chordata
TRINITY_DN6309_c0_g1_i2	1055	766	XP_042141081.1	XP_042141081.1 S-formylglutathione hydrolase isoform X1 [Peromyscus maniculatus bairdii]	Abhydrolase superfamily	8.36e-149	Peromyscus maniculatus bairdii	Chordata
TRINITY_DN6309_c0_g1_i2	1055	766	XP_032773608.1	XP_032773608.1 S-formylglutathione hydrolase [Rattus rattus]	Abhydrolase superfamily	1.72e-148	Rattus rattus	Chordata
TRINITY_DN6309_c0_g1_i2	1055	766	XP_028733490.1	XP_028733490.1 S-formylglutathione hydrolase [Peromyscus leucopus]	Abhydrolase superfamily	3.47e-148	Peromyscus leucopus	Chordata
TRINITY_DN6309_c0_g1_i2	1055	766	NP_001099521.1	NP_001099521.1 S-formylglutathione hydrolase isoform a [Rattus norvegicus]	Abhydrolase superfamily	9.91e-148	Rattus norvegicus;Ranitomeya imitator	Chordata
TRINITY_DN6309_c0_g1_i2	1055	766	KAF6207383.1	KAF6207383.1 hypothetical protein [Apolygus lucorum]	Abhydrolase superfamily	1.36e-147	Apolygus lucorum	Arthropoda
TRINITY_DN6309_c0_g1_i2	1055	766	XP_021037300.1	XP_021037300.1 S-formylglutathione hydrolase [Mus caroli]	Abhydrolase superfamily	1.41e-147	Mus caroli	Chordata
TRINITY_DN6309_c0_g1_i2	1055	766	XP_021059074.1	XP_021059074.1 S-formylglutathione hydrolase [Mus pahari]	Abhydrolase superfamily	2.83e-147	Mus pahari	Chordata
TRINITY_DN6309_c0_g1_i2	1055	766	XP_031217721.1	XP_031217721.1 S-formylglutathione hydrolase [Mastomys coucha]	Abhydrolase superfamily	2.83e-147	Mastomys coucha	Chordata
TRINITY_DN6309_c0_g1_i2	1055	766	XP_036055350.1	XP_036055350.1 S-formylglutathione hydrolase isoform X1 [Onychomys torridus]	Abhydrolase superfamily	5.71e-147	Onychomys torridus	Chordata
TRINITY_DN6309_c0_g1_i2	1055	766	XP_006007704.1	XP_006007704.1 PREDICTED: S-formylglutathione hydrolase [Latimeria chalumnae]	Abhydrolase superfamily	5.71e-147	Latimeria chalumnae	Chordata
TRINITY_DN6309_c0_g1_i2	1055	766	XP_034354733.1	XP_034354733.1 S-formylglutathione hydrolase [Arvicanthis niloticus]	Abhydrolase superfamily	1.15e-146	Arvicanthis niloticus	Chordata
TRINITY_DN6309_c0_g1_i2	1055	766	XP_013785171.2	XP_013785171.2 S-formylglutathione hydrolase-like isoform X1 [Limulus polyphemus]	Abhydrolase superfamily	1.17e-146	Limulus polyphemus	Arthropoda
TRINITY_DN6309_c0_g1_i2	1055	766	XP_028610080.1	XP_028610080.1 S-formylglutathione hydrolase [Grammomys surdaster]	Abhydrolase superfamily	1.63e-146	Grammomys surdaster	Chordata
TRINITY_DN6309_c0_g1_i2	1055	766	XP_007648741.1	XP_007648741.1 S-formylglutathione hydrolase [Cricetulus griseus]	Abhydrolase superfamily	3.29e-146	Cricetulus griseus	Chordata
TRINITY_DN6309_c0_g1_i2	1055	766	XP_022253420.1	XP_022253420.1 S-formylglutathione hydrolase-like isoform X2 [Limulus polyphemus]	Abhydrolase superfamily	4.89e-146	Limulus polyphemus	Arthropoda
TRINITY_DN6309_c0_g1_i2	1055	766	CAD7432026.1	CAD7432026.1 unnamed protein product [Timema monikensis]	Abhydrolase superfamily	5.01e-146	Timema monikensis	Arthropoda
TRINITY_DN6309_c0_g1_i2	1055	766	XP_032830922.1	XP_032830922.1 S-formylglutathione hydrolase isoform X1 [Petromyzon marinus]	Abhydrolase superfamily	7.63e-146	Petromyzon marinus	Chordata
TRINITY_DN6309_c0_g1_i2	1055	766	XP_032830923.1	XP_032830923.1 S-formylglutathione hydrolase isoform X2 [Petromyzon marinus]	Abhydrolase superfamily	9.39e-146	Petromyzon marinus	Chordata
TRINITY_DN6309_c0_g1_i2	1055	766	NP_058599.1	NP_058599.1 S-formylglutathione hydrolase isoform 2 [Mus musculus]	Abhydrolase superfamily	1.33e-145	Mus musculus	Chordata
TRINITY_DN8042_c0_g1_i2	3616	758	KAF5896902.1	KAF5896902.1 uncharacterized protein DAT39_013383, partial [Clarias magur]	Gal-bind_lectin	8.39e-106	Clarias magur	Chordata
TRINITY_DN8042_c0_g1_i2	3616	758	XP_042630726.1	XP_042630726.1 uncharacterized protein lgals4 isoform X14 [Cyprinus carpio]	Gal-bind_lectin	1.61e-103	Cyprinus carpio	Chordata
TRINITY_DN8042_c0_g1_i2	3616	758	KAF4101770.1	KAF4101770.1 hypothetical protein G5714_018202 [Onychostoma macrolepis]	Gal-bind_lectin	2.43e-103	Onychostoma macrolepis	Chordata
TRINITY_DN8042_c0_g1_i2	3616	758	XP_036440683.1	XP_036440683.1 uncharacterized protein si:dkey-151j17.4 [Colossoma macropomum]	Gal-bind_lectin	1.92e-99	Colossoma macropomum	Chordata
TRINITY_DN8042_c0_g1_i2	3616	758	XP_005173766.1	XP_005173766.1 uncharacterized protein si:dkey-151j17.4 isoform X9 [Danio rerio]	Gal-bind_lectin	5.7e-98	Danio rerio	Chordata
TRINITY_DN8042_c0_g1_i2	3616	758	XP_005173760.1	XP_005173760.1 uncharacterized protein si:dkey-151j17.4 isoform X8 [Danio rerio]	Gal-bind_lectin	1.06e-96	Danio rerio	Chordata
TRINITY_DN8042_c0_g1_i2	3616	758	XP_026088443.1	XP_026088443.1 uncharacterized protein LOC113062675 [Carassius auratus]	Gal-bind_lectin	1.54e-96	Carassius auratus	Chordata
TRINITY_DN8042_c0_g1_i2	3616	758	XP_005173762.1	XP_005173762.1 uncharacterized protein si:dkey-151j17.4 isoform X10 [Danio rerio]	Gal-bind_lectin	3.43e-96	Danio rerio	Chordata
TRINITY_DN8042_c0_g1_i2	3616	758	XP_005173761.1	XP_005173761.1 uncharacterized protein si:dkey-151j17.4 isoform X11 [Danio rerio]	Gal-bind_lectin	6.16e-96	Danio rerio	Chordata
TRINITY_DN8042_c0_g1_i2	3616	758	XP_005173768.1	XP_005173768.1 uncharacterized protein si:dkey-151j17.4 isoform X15 [Danio rerio]	Gal-bind_lectin	8.25e-96	Danio rerio	Chordata
TRINITY_DN8042_c0_g1_i2	3616	758	XP_005173767.1	XP_005173767.1 uncharacterized protein si:dkey-151j17.4 isoform X14 [Danio rerio]	Gal-bind_lectin	1.11e-95	Danio rerio	Chordata
TRINITY_DN8042_c0_g1_i2	3616	758	XP_005173765.1	XP_005173765.1 uncharacterized protein si:dkey-151j17.4 isoform X17 [Danio rerio]	Gal-bind_lectin	1.48e-95	Danio rerio	Chordata
TRINITY_DN8042_c0_g1_i2	3616	758	XP_005173759.1	XP_005173759.1 uncharacterized protein si:dkey-151j17.4 isoform X7 [Danio rerio]	Gal-bind_lectin	1.48e-95	Danio rerio	Chordata
TRINITY_DN8042_c0_g1_i2	3616	758	XP_017207645.1	XP_017207645.1 uncharacterized protein si:dkey-151j17.4 isoform X16 [Danio rerio]	Gal-bind_lectin	1.48e-95	Danio rerio	Chordata
TRINITY_DN8042_c0_g1_i2	3616	758	XP_009292173.1	XP_009292173.1 uncharacterized protein si:dkey-151j17.4 isoform X3 [Danio rerio]	Gal-bind_lectin	1.56e-95	Danio rerio	Chordata
TRINITY_DN8042_c0_g1_i2	3616	758	XP_005173764.1	XP_005173764.1 uncharacterized protein si:dkey-151j17.4 isoform X12 [Danio rerio]	Gal-bind_lectin	1.98e-95	Danio rerio	Chordata
TRINITY_DN8042_c0_g1_i2	3616	758	XP_005173758.1	XP_005173758.1 uncharacterized protein si:dkey-151j17.4 isoform X6 [Danio rerio]	Gal-bind_lectin	8.98e-95	Danio rerio	Chordata
TRINITY_DN8042_c0_g1_i2	3616	758	XP_005173755.1	XP_005173755.1 uncharacterized protein si:dkey-151j17.4 isoform X1 [Danio rerio]	Gal-bind_lectin	9.46e-95	Danio rerio	Chordata
TRINITY_DN8042_c0_g1_i2	3616	758	XP_005173769.1	XP_005173769.1 uncharacterized protein si:dkey-151j17.4 isoform X19 [Danio rerio]	Gal-bind_lectin	8.72e-94	Danio rerio	Chordata
TRINITY_DN8042_c0_g1_i2	3616	758	XP_017207646.1	XP_017207646.1 uncharacterized protein si:dkey-151j17.4 isoform X18 [Danio rerio]	Gal-bind_lectin	8.72e-94	Danio rerio	Chordata
TRINITY_DN6311_c0_g1_i32	3675	692	XP_015922387.2	XP_015922387.2 uncharacterized protein LOC107450953 [Parasteatoda tepidariorum]	DEAD-like_helicase_N superfamily	1.33e-65	Parasteatoda tepidariorum	Arthropoda
TRINITY_DN6311_c0_g1_i32	3675	692	OCT74899.1	OCT74899.1 hypothetical protein XELAEV_18033886mg [Xenopus laevis]	DEAD-like_helicase_N superfamily	9.32e-52	Xenopus laevis	Chordata
TRINITY_DN6311_c0_g1_i32	3675	692	OCT89257.1	OCT89257.1 hypothetical protein XELAEV_18017876mg [Xenopus laevis]	DEAD-like_helicase_N superfamily	1.73e-51	Xenopus laevis	Chordata
TRINITY_DN6311_c0_g1_i32	3675	692	OCT67511.1	OCT67511.1 hypothetical protein XELAEV_18038809mg [Xenopus laevis]	DEAD-like_helicase_N superfamily	2.36e-51	Xenopus laevis	Chordata
TRINITY_DN6311_c0_g1_i32	3675	692	OCT98456.1	OCT98456.1 hypothetical protein XELAEV_18010688mg [Xenopus laevis]	DEAD-like_helicase_N superfamily	5.97e-51	Xenopus laevis	Chordata
TRINITY_DN6311_c0_g1_i32	3675	692	GBN37261.1	GBN37261.1 hypothetical protein AVEN_158229-1 [Araneus ventricosus]	DEAD-like_helicase_N superfamily	6.13e-50	Araneus ventricosus	Arthropoda
TRINITY_DN6311_c0_g1_i32	3675	692	XP_023224345.1	XP_023224345.1 uncharacterized protein LOC111625431 [Centruroides sculpturatus]	DEAD-like_helicase_N superfamily	3.88e-49	Centruroides sculpturatus	Arthropoda
TRINITY_DN6311_c0_g1_i32	3675	692	KMQ86165.1	KMQ86165.1 atp-dependent dna helicase pif1-like protein [Lasius niger]	DEAD-like_helicase_N superfamily	1.1e-48	Lasius niger	Arthropoda
TRINITY_DN6311_c0_g1_i32	3675	692	XP_035232337.1	XP_035232337.1 ATP-dependent DNA helicase PIF1-like [Stegodyphus dumicola]	DEAD-like_helicase_N superfamily	1.95e-48	Stegodyphus dumicola	Arthropoda
TRINITY_DN6311_c0_g1_i32	3675	692	OCT96778.1	OCT96778.1 hypothetical protein XELAEV_18008993mg [Xenopus laevis]	DEAD-like_helicase_N superfamily	7.85e-48	Xenopus laevis	Chordata
TRINITY_DN6311_c0_g1_i32	3675	692	GBO23006.1	GBO23006.1 ATP-dependent DNA helicase PIF1 [Araneus ventricosus]	DEAD-like_helicase_N superfamily	1.24e-47	Araneus ventricosus	Arthropoda
TRINITY_DN6311_c0_g1_i32	3675	692	GBM17065.1	GBM17065.1 hypothetical protein AVEN_88143-1 [Araneus ventricosus]	DEAD-like_helicase_N superfamily	1.24e-47	Araneus ventricosus	Arthropoda
TRINITY_DN6311_c0_g1_i32	3675	692	XP_018098585.1	XP_018098585.1 ATP-dependent DNA helicase pif1 [Xenopus laevis]	DEAD-like_helicase_N superfamily	1.24e-47	Xenopus laevis	Chordata
TRINITY_DN6311_c0_g1_i32	3675	692	GBP55934.1	GBP55934.1 ATP-dependent DNA helicase PIF1 [Eumeta japonica]	DEAD-like_helicase_N superfamily	1.76e-47	Eumeta japonica	Arthropoda
TRINITY_DN6311_c0_g1_i32	3675	692	XP_030071363.1	XP_030071363.1 uncharacterized protein LOC115478208 [Microcaecilia unicolor]	DEAD-like_helicase_N superfamily	2.61e-47	Microcaecilia unicolor	Chordata
TRINITY_DN6311_c0_g1_i32	3675	692	XP_030066702.1	XP_030066702.1 uncharacterized protein LOC115475102 [Microcaecilia unicolor]	DEAD-like_helicase_N superfamily	5.26e-47	Microcaecilia unicolor	Chordata
TRINITY_DN6311_c0_g1_i32	3675	692	CAF3262621.1	CAF3262621.1 unnamed protein product, partial [Rotaria sp. Silwood2]	DEAD-like_helicase_N superfamily	8.47e-47	Rotaria sp. Silwood2	Rotifera
TRINITY_DN6311_c0_g1_i32	3675	692	CAF1613761.1	CAF1613761.1 unnamed protein product [Adineta ricciae]	DEAD-like_helicase_N superfamily	1.05e-46	Adineta ricciae	Rotifera
TRINITY_DN6311_c0_g1_i32	3675	692	XP_030064574.1	XP_030064574.1 LOW QUALITY PROTEIN: ATP-dependent DNA helicase PIF1-like [Microcaecilia unicolor]	DEAD-like_helicase_N superfamily	1.09e-46	Microcaecilia unicolor	Chordata
TRINITY_DN6311_c0_g1_i32	3675	692	GFY00910.1	GFY00910.1 ATP-dependent DNA helicase [Trichonephila clavipes]	DEAD-like_helicase_N superfamily	1.77e-46	Trichonephila clavipes	Arthropoda
TRINITY_DN9967_c0_g1_i9	3713	670	XP_014639618.1	XP_014639618.1 PREDICTED: zinc finger MYM-type protein 1 isoform X4 [Ceratotherium simum simum]	DUF4371 superfamily	2.17e-216	Ceratotherium simum simum	Chordata
TRINITY_DN9967_c0_g1_i9	3713	670	XP_014639617.1	XP_014639617.1 PREDICTED: zinc finger MYM-type protein 1 isoform X3 [Ceratotherium simum simum]	DUF4371 superfamily	1.61e-213	Ceratotherium simum simum	Chordata
TRINITY_DN9967_c0_g1_i9	3713	670	XP_034504874.1	XP_034504874.1 zinc finger MYM-type protein 1 isoform X5 [Ailuropoda melanoleuca]	DUF4371 superfamily	3.04e-213	Ailuropoda melanoleuca	Chordata
TRINITY_DN9967_c0_g1_i9	3713	670	XP_030883166.1	XP_030883166.1 zinc finger MYM-type protein 1 isoform X5 [Leptonychotes weddellii]	DUF4371 superfamily	4.28e-213	Leptonychotes weddellii	Chordata
TRINITY_DN9967_c0_g1_i9	3713	670	XP_041594714.1	XP_041594714.1 zinc finger MYM-type protein 1 isoform X4 [Vulpes lagopus]	DUF4371 superfamily	8.23e-213	Vulpes lagopus	Chordata
TRINITY_DN9967_c0_g1_i9	3713	670	XP_025847567.1	XP_025847567.1 zinc finger MYM-type protein 1 isoform X4 [Vulpes vulpes]	DUF4371 superfamily	1.43e-212	Vulpes vulpes	Chordata
TRINITY_DN9967_c0_g1_i9	3713	670	XP_014639616.1	XP_014639616.1 PREDICTED: zinc finger MYM-type protein 1 isoform X2 [Ceratotherium simum simum]	DUF4371 superfamily	1.51e-212	Ceratotherium simum simum	Chordata
TRINITY_DN9967_c0_g1_i9	3713	670	XP_035921199.1	XP_035921199.1 zinc finger MYM-type protein 1 isoform X5 [Halichoerus grypus]	DUF4371 superfamily	1.69e-212	Halichoerus grypus	Chordata
TRINITY_DN9967_c0_g1_i9	3713	670	XP_012497696.1	XP_012497696.1 PREDICTED: zinc finger MYM-type protein 1 isoform X2 [Propithecus coquereli]	DUF4371 superfamily	1.8e-212	Propithecus coquereli	Chordata
TRINITY_DN9967_c0_g1_i9	3713	670	XP_034504884.1	XP_034504884.1 zinc finger MYM-type protein 1 isoform X6 [Ailuropoda melanoleuca]	DUF4371 superfamily	2.1e-212	Ailuropoda melanoleuca	Chordata
TRINITY_DN9967_c0_g1_i9	3713	670	XP_025847566.1	XP_025847566.1 zinc finger MYM-type protein 1 isoform X3 [Vulpes vulpes]	DUF4371 superfamily	2.3e-212	Vulpes vulpes	Chordata
TRINITY_DN9967_c0_g1_i9	3713	670	KAF5910354.1	KAF5910354.1 hypothetical protein HPG69_014586 [Diceros bicornis minor]	DUF4371 superfamily	2.31e-212	Diceros bicornis minor	Chordata
TRINITY_DN9967_c0_g1_i9	3713	670	XP_004425988.2	XP_004425988.2 PREDICTED: zinc finger MYM-type protein 1 isoform X1 [Ceratotherium simum simum]	DUF4371 superfamily	2.31e-212	Ceratotherium simum simum	Chordata
TRINITY_DN9967_c0_g1_i9	3713	670	XP_034875035.1	XP_034875035.1 zinc finger MYM-type protein 1 isoform X4 [Mirounga leonina]	DUF4371 superfamily	4.71e-212	Mirounga leonina	Chordata
TRINITY_DN9967_c0_g1_i9	3713	670	XP_030883165.1	XP_030883165.1 zinc finger MYM-type protein 1 isoform X4 [Leptonychotes weddellii]	DUF4371 superfamily	5.28e-212	Leptonychotes weddellii	Chordata
TRINITY_DN9967_c0_g1_i9	3713	670	XP_037355956.1	XP_037355956.1 zinc finger MYM-type protein 1 isoform X4 [Talpa occidentalis]	DUF4371 superfamily	7.19e-212	Talpa occidentalis	Chordata
TRINITY_DN9967_c0_g1_i9	3713	670	XP_025712529.1	XP_025712529.1 zinc finger MYM-type protein 1 isoform X7 [Callorhinus ursinus]	DUF4371 superfamily	8.26e-212	Zalophus californianus;Callorhinus ursinus;Eumetopias jubatus	Chordata
TRINITY_DN9967_c0_g1_i9	3713	670	XP_040475173.1	XP_040475173.1 zinc finger MYM-type protein 1 isoform X5 [Ursus maritimus]	DUF4371 superfamily	9.06e-212	Ursus maritimus	Chordata
TRINITY_DN9967_c0_g1_i9	3713	670	XP_032244119.1	XP_032244119.1 zinc finger MYM-type protein 1 isoform X5 [Phoca vitulina]	DUF4371 superfamily	9.34e-212	Phoca vitulina	Chordata
TRINITY_DN9967_c0_g1_i9	3713	670	XP_023583022.1	XP_023583022.1 zinc finger MYM-type protein 1 isoform X2 [Trichechus manatus latirostris]	DUF4371 superfamily	1.29e-211	Trichechus manatus latirostris	Chordata
TRINITY_DN4584_c0_g1_i8	4088	622	KAG8262571.1	KAG8262571.1 hypothetical protein J6590_051060 [Homalodisca vitripennis]	zf-C2H2_8 superfamily	1.42e-47	Homalodisca vitripennis	Arthropoda
TRINITY_DN4584_c0_g1_i8	4088	622	XP_019637300.1	XP_019637300.1 PREDICTED: zinc finger protein 879-like [Branchiostoma belcheri]	zf-C2H2_8 superfamily	2.52e-07	Branchiostoma belcheri	Chordata
TRINITY_DN4584_c0_g1_i8	4088	622	KAG7306574.1	KAG7306574.1 hypothetical protein JYU34_007944 [Plutella xylostella]	zf-C2H2_8 superfamily	4e-06	Plutella xylostella	Arthropoda
TRINITY_DN4584_c0_g1_i8	4088	622	XP_009030612.1	XP_009030612.1 hypothetical protein HELRODRAFT_133378, partial [Helobdella robusta]	zf-C2H2_8 superfamily	8.64e-06	Helobdella robusta	Annelida
TRINITY_DN4584_c0_g1_i8	4088	622	KAG7306576.1	KAG7306576.1 hypothetical protein JYU34_007946 [Plutella xylostella]	zf-C2H2_8 superfamily	1.81e-05	Plutella xylostella	Arthropoda
TRINITY_DN4584_c0_g1_i8	4088	622	CAB3267982.1	CAB3267982.1 ZF(C2H2)-13 zinc finger protein [Phallusia mammillata]	zf-C2H2_8 superfamily	3.55e-05	Phallusia mammillata	Chordata
TRINITY_DN4584_c0_g1_i8	4088	622	XP_015511078.1	XP_015511078.1 PREDICTED: gastrula zinc finger protein XlCGF7.1-like [Neodiprion lecontei]	zf-C2H2_8 superfamily	3.63e-05	Neodiprion lecontei	Arthropoda
TRINITY_DN4584_c0_g1_i8	4088	622	XP_017327051.1	XP_017327051.1 PREDICTED: zinc finger and BTB domain-containing protein 41 [Ictalurus punctatus]	zf-C2H2_8 superfamily	4.5e-05	Ictalurus punctatus	Chordata
TRINITY_DN4584_c0_g1_i8	4088	622	ODM91403.1	ODM91403.1 putative zinc finger protein, partial [Orchesella cincta]	zf-C2H2_8 superfamily	4.78e-05	Orchesella cincta	Arthropoda
TRINITY_DN4584_c0_g1_i8	4088	622	KAF5893612.1	KAF5893612.1 zinc finger and BTB domain-containing protein 41, partial [Clarias magur]	zf-C2H2_8 superfamily	5.33e-05	Clarias magur	Chordata
TRINITY_DN4584_c0_g1_i8	4088	622	XP_037006796.1	XP_037006796.1 zinc finger and BTB domain-containing protein 41 [Artibeus jamaicensis]	zf-C2H2_8 superfamily	6.02e-05	Artibeus jamaicensis	Chordata
TRINITY_DN4584_c0_g1_i8	4088	622	XP_021485737.1	XP_021485737.1 zinc finger Y-chromosomal protein 1-like [Meriones unguiculatus]	zf-C2H2_8 superfamily	6.28e-05	Meriones unguiculatus	Chordata
TRINITY_DN4584_c0_g1_i8	4088	622	TRY53960.1	TRY53960.1 hypothetical protein DNTS_029803 [Danionella translucida]	zf-C2H2_8 superfamily	7.89e-05	Danionella translucida	Chordata
TRINITY_DN903_c1_g1_i8	1867	592	CAG5105691.1	CAG5105691.1 Oidioi.mRNA.OKI2018_I69.chr1.g2365.t1.cds [Oikopleura dioica]	ATP9	1.12e-16	Oikopleura dioica	Chordata
TRINITY_DN903_c1_g1_i8	1867	592	CBY24515.1	CBY24515.1 unnamed protein product [Oikopleura dioica]	ATP9	1.12e-16	Oikopleura dioica	Chordata
TRINITY_DN903_c1_g1_i8	1867	592	CBY33504.1	CBY33504.1 unnamed protein product [Oikopleura dioica]	ATP9	1.12e-16	Oikopleura dioica	Chordata
TRINITY_DN903_c1_g1_i8	1867	592	CAG5105853.1	CAG5105853.1 Oidioi.mRNA.OKI2018_I69.chr1.g2513.t1.cds [Oikopleura dioica]	ATP9	1.12e-16	Oikopleura dioica	Chordata
TRINITY_DN903_c1_g1_i8	1867	592	CAG5094586.1	CAG5094586.1 Oidioi.mRNA.OKI2018_I69.XSR.g13686.t1.cds [Oikopleura dioica]	ATP9	1.12e-16	Oikopleura dioica	Chordata
TRINITY_DN903_c1_g1_i8	1867	592	KAF6372976.1	KAF6372976.1 ATP synthase membrane subunit c locus 2 [Pipistrellus kuhlii]	ATP9	3.52e-16	Pipistrellus kuhlii	Chordata
TRINITY_DN903_c1_g1_i8	1867	592	AAV98567.1	AAV98567.1 mitochondrial F0 complex H+-transporting ATP synthase subunit c isoform 1, partial [Macaca mulatta]	ATP9	3.72e-16	Macaca mulatta	Chordata
TRINITY_DN903_c1_g1_i8	1867	592	NWH79191.1	NWH79191.1 AT5G2 synthase [Piaya cayana]	ATP9	4.14e-16	Piaya cayana	Chordata
TRINITY_DN903_c1_g1_i8	1867	592	KAB1734203.1	KAB1734203.1 F0F1 ATP synthase subunit C [Klebsiella pneumoniae]	ATP9	4.38e-16	Klebsiella pneumoniae	Proteobacteria
TRINITY_DN903_c1_g1_i8	1867	592	ABD65503.1	ABD65503.1 ATP synthase H+ transporting mitochondrial F0 complex-like, partial [Ictalurus punctatus]	ATP9	4.5e-16	Ictalurus punctatus	Chordata
TRINITY_DN903_c1_g1_i8	1867	592	NWI84842.1	NWI84842.1 AT5G2 synthase [Pitta sordida]	ATP9	4.63e-16	Pitta sordida;Acrocephalus arundinaceus;Pycnonotus jocosus	Chordata
TRINITY_DN903_c1_g1_i8	1867	592	EPQ03590.1	EPQ03590.1 ATP synthase lipid-binding protein, mitochondrial, partial [Myotis brandtii]	ATP9	4.63e-16	Myotis brandtii	Chordata
TRINITY_DN903_c1_g1_i8	1867	592	POI19846.1	POI19846.1 hypothetical protein CIB84_016407 [Bambusicola thoracicus]	ATP9	5.47e-16	Bambusicola thoracicus	Chordata
TRINITY_DN903_c1_g1_i8	1867	592	OXB55621.1	OXB55621.1 hypothetical protein ASZ78_002842 [Callipepla squamata]	ATP9	5.47e-16	Callipepla squamata	Chordata
TRINITY_DN903_c1_g1_i8	1867	592	NXV80472.1	NXV80472.1 AT5G2 synthase [Atlantisia rogersi]	ATP9	5.95e-16	Atlantisia rogersi	Chordata
TRINITY_DN903_c1_g1_i8	1867	592	CAE6459182.1	CAE6459182.1 unnamed protein product, partial [Rhizoctonia solani]	ATP9	5.95e-16	Rhizoctonia solani	Basidiomycota
TRINITY_DN903_c1_g1_i8	1867	592	KFO96250.1	KFO96250.1 hypothetical protein N300_12407, partial [Calypte anna]	ATP9	5.95e-16	Calypte anna	Chordata
TRINITY_DN903_c1_g1_i8	1867	592	NWR56405.1	NWR56405.1 AT5G2 synthase [Bucorvus abyssinicus]	ATP9	5.95e-16	Bucorvus abyssinicus	Chordata
TRINITY_DN903_c1_g1_i8	1867	592	NWH68548.1	NWH68548.1 AT5G2 synthase [Geococcyx californianus]	ATP9	5.95e-16	Geococcyx californianus	Chordata
TRINITY_DN903_c1_g1_i8	1867	592	KFQ19712.1	KFQ19712.1 hypothetical protein N331_06840, partial [Merops nubicus]	ATP9	5.95e-16	Merops nubicus	Chordata
TRINITY_DN12510_c0_g1_i15	3402	570	XP_030749267.1	XP_030749267.1 uncharacterized protein LOC115877255 [Sitophilus oryzae]	DUF4371 superfamily	5.59e-147	Sitophilus oryzae	Arthropoda
TRINITY_DN12510_c0_g1_i15	3402	570	XP_033977734.1	XP_033977734.1 zinc finger MYM-type protein 1-like [Trematomus bernacchii]	DUF4371 superfamily	9.75e-138	Trematomus bernacchii	Chordata
TRINITY_DN12510_c0_g1_i15	3402	570	XP_033987864.1	XP_033987864.1 zinc finger MYM-type protein 1-like [Trematomus bernacchii]	DUF4371 superfamily	9.75e-138	Trematomus bernacchii	Chordata
TRINITY_DN12510_c0_g1_i15	3402	570	XP_033998311.1	XP_033998311.1 zinc finger MYM-type protein 1-like [Trematomus bernacchii]	DUF4371 superfamily	4.95e-137	Trematomus bernacchii	Chordata
TRINITY_DN12510_c0_g1_i15	3402	570	XP_033976228.1	XP_033976228.1 zinc finger MYM-type protein 1-like [Trematomus bernacchii]	DUF4371 superfamily	9.71e-137	Trematomus bernacchii	Chordata
TRINITY_DN12510_c0_g1_i15	3402	570	XP_033987447.1	XP_033987447.1 zinc finger MYM-type protein 1-like [Trematomus bernacchii]	DUF4371 superfamily	1.36e-136	Trematomus bernacchii	Chordata
TRINITY_DN12510_c0_g1_i15	3402	570	XP_033985073.1	XP_033985073.1 zinc finger MYM-type protein 1-like [Trematomus bernacchii]	DUF4371 superfamily	5.79e-135	Trematomus bernacchii	Chordata
TRINITY_DN12510_c0_g1_i15	3402	570	XP_033998058.1	XP_033998058.1 zinc finger MYM-type protein 1-like [Trematomus bernacchii]	DUF4371 superfamily	1.38e-134	Trematomus bernacchii	Chordata
TRINITY_DN12510_c0_g1_i15	3402	570	XP_033986973.1	XP_033986973.1 zinc finger MYM-type protein 1-like [Trematomus bernacchii]	DUF4371 superfamily	3.58e-134	Trematomus bernacchii	Chordata
TRINITY_DN12510_c0_g1_i15	3402	570	RXN05739.1	RXN05739.1 zinc finger MYM-type 1-like protein [Labeo rohita]	DUF4371 superfamily	9.78e-132	Labeo rohita	Chordata
TRINITY_DN12510_c0_g1_i15	3402	570	XP_022518513.1	XP_022518513.1 zinc finger MYM-type protein 1-like [Astyanax mexicanus]	DUF4371 superfamily	4.32e-131	Astyanax mexicanus	Chordata
TRINITY_DN12510_c0_g1_i15	3402	570	XP_039518567.1	XP_039518567.1 zinc finger MYM-type protein 1-like [Pimephales promelas]	DUF4371 superfamily	4.52e-131	Pimephales promelas	Chordata
TRINITY_DN12510_c0_g1_i15	3402	570	RXN12340.1	RXN12340.1 zinc finger MYM-type 1-like protein [Labeo rohita]	DUF4371 superfamily	1.03e-130	Labeo rohita	Chordata
TRINITY_DN12510_c0_g1_i15	3402	570	XP_026822397.1	XP_026822397.1 zinc finger MYM-type protein 1-like [Rhopalosiphum maidis]	DUF4371 superfamily	1.63e-130	Rhopalosiphum maidis	Arthropoda
TRINITY_DN12510_c0_g1_i15	3402	570	XP_019210374.1	XP_019210374.1 zinc finger MYM-type protein 1-like [Oreochromis niloticus]	DUF4371 superfamily	1.64e-130	Oreochromis niloticus	Chordata
TRINITY_DN12510_c0_g1_i15	3402	570	XP_039893858.1	XP_039893858.1 zinc finger MYM-type protein 1-like [Simochromis diagramma]	DUF4371 superfamily	2.3e-130	Simochromis diagramma	Chordata
TRINITY_DN12510_c0_g1_i15	3402	570	XP_019207205.1	XP_019207205.1 zinc finger MYM-type protein 1-like [Oreochromis niloticus]	DUF4371 superfamily	3.22e-130	Oreochromis niloticus	Chordata
TRINITY_DN12510_c0_g1_i15	3402	570	XP_024656541.1	XP_024656541.1 zinc finger MYM-type protein 1 [Maylandia zebra]	DUF4371 superfamily	3.22e-130	Maylandia zebra	Chordata
TRINITY_DN12510_c0_g1_i15	3402	570	XP_024659060.1	XP_024659060.1 zinc finger MYM-type protein 1-like [Maylandia zebra]	DUF4371 superfamily	4.51e-130	Maylandia zebra	Chordata
TRINITY_DN12510_c0_g1_i15	3402	570	XP_019211352.1	XP_019211352.1 zinc finger MYM-type protein 1-like [Oreochromis niloticus]	DUF4371 superfamily	2.73e-129	Oreochromis niloticus;Simochromis diagramma	Chordata
TRINITY_DN5126_c0_g1_i4	3489	480	KAG8276181.1	KAG8276181.1 hypothetical protein J6590_070833 [Homalodisca vitripennis]	P-loop_NTPase superfamily	2.5e-32	Homalodisca vitripennis	Arthropoda
TRINITY_DN5126_c0_g1_i4	3489	480	XP_026693613.1	XP_026693613.1 uncharacterized protein LOC101242320 [Ciona intestinalis]	P-loop_NTPase superfamily	1.56e-31	Ciona intestinalis	Chordata
TRINITY_DN5126_c0_g1_i4	3489	480	XP_026693612.1	XP_026693612.1 atlastin-2-like isoform X2 [Ciona intestinalis]	P-loop_NTPase superfamily	1.8e-31	Ciona intestinalis	Chordata
TRINITY_DN5126_c0_g1_i4	3489	480	XP_018670535.1	XP_018670535.1 atlastin-2-like isoform X1 [Ciona intestinalis]	P-loop_NTPase superfamily	3.22e-31	Ciona intestinalis	Chordata
TRINITY_DN5126_c0_g1_i4	3489	480	XP_039256310.1	XP_039256310.1 atlastin-3-like [Styela clava]	P-loop_NTPase superfamily	3.82e-31	Styela clava	Chordata
TRINITY_DN5126_c0_g1_i4	3489	480	XP_022335973.1	XP_022335973.1 atlastin-2-like isoform X3 [Crassostrea virginica]	P-loop_NTPase superfamily	6.72e-30	Crassostrea virginica	Mollusca
TRINITY_DN5126_c0_g1_i4	3489	480	KAF7707351.1	KAF7707351.1 hypothetical protein HF521_018569 [Silurus meridionalis]	P-loop_NTPase superfamily	6.74e-30	Silurus meridionalis	Chordata
TRINITY_DN5126_c0_g1_i4	3489	480	XP_037531165.1	XP_037531165.1 atlastin-3 [Nematolebias whitei]	P-loop_NTPase superfamily	9.05e-30	Nematolebias whitei	Chordata
TRINITY_DN5126_c0_g1_i4	3489	480	KAG8276191.1	KAG8276191.1 hypothetical protein J6590_070842 [Homalodisca vitripennis]	P-loop_NTPase superfamily	3.27e-29	Homalodisca vitripennis	Arthropoda
TRINITY_DN5126_c0_g1_i4	3489	480	XP_015795562.1	XP_015795562.1 atlastin-2-like [Tetranychus urticae]	P-loop_NTPase superfamily	4.83e-29	Tetranychus urticae	Arthropoda
TRINITY_DN5126_c0_g1_i4	3489	480	XP_037289386.1	XP_037289386.1 atlastin-2-like [Rhipicephalus microplus]	P-loop_NTPase superfamily	7.79e-29	Rhipicephalus microplus	Arthropoda
TRINITY_DN5126_c0_g1_i4	3489	480	XP_022335971.1	XP_022335971.1 atlastin-2-like isoform X1 [Crassostrea virginica]	P-loop_NTPase superfamily	9e-29	Crassostrea virginica	Mollusca
TRINITY_DN5126_c0_g1_i4	3489	480	XP_041846488.1	XP_041846488.1 atlastin-3 [Melanotaenia boesemani]	P-loop_NTPase superfamily	9.46e-29	Melanotaenia boesemani	Chordata
TRINITY_DN5126_c0_g1_i4	3489	480	KAG8564186.1	KAG8564186.1 hypothetical protein GDO81_016359 [Engystomops pustulosus]	P-loop_NTPase superfamily	2.16e-28	Engystomops pustulosus	Chordata
TRINITY_DN5126_c0_g1_i4	3489	480	XP_022335974.1	XP_022335974.1 atlastin-2-like isoform X4 [Crassostrea virginica]	P-loop_NTPase superfamily	2.28e-28	Crassostrea virginica	Mollusca
TRINITY_DN5126_c0_g1_i4	3489	480	XP_013860938.1	XP_013860938.1 PREDICTED: atlastin-3-like [Austrofundulus limnaeus]	P-loop_NTPase superfamily	2.28e-28	Austrofundulus limnaeus	Chordata
TRINITY_DN5126_c0_g1_i4	3489	480	XP_036424594.1	XP_036424594.1 atlastin-3 [Colossoma macropomum]	P-loop_NTPase superfamily	2.28e-28	Colossoma macropomum	Chordata
TRINITY_DN5126_c0_g1_i4	3489	480	KAF0300753.1	KAF0300753.1 Atlastin [Amphibalanus amphitrite]	P-loop_NTPase superfamily	2.77e-28	Amphibalanus amphitrite	Arthropoda
TRINITY_DN5126_c0_g1_i4	3489	480	XP_037272400.1	XP_037272400.1 atlastin-1-like [Rhipicephalus microplus]	P-loop_NTPase superfamily	2.85e-28	Rhipicephalus microplus	Arthropoda
TRINITY_DN5126_c0_g1_i4	3489	480	XP_041800093.1	XP_041800093.1 atlastin-3 [Chelmon rostratus]	P-loop_NTPase superfamily	4.09e-28	Chelmon rostratus	Chordata
TRINITY_DN18805_c0_g4_i2	2756	456	KAF4088108.1	KAF4088108.1 hypothetical protein AMELA_G00079120 [Ameiurus melas]	Myb_DNA-bind_4	5.95e-12	Ameiurus melas	Chordata
TRINITY_DN18805_c0_g4_i2	2756	456	XP_017329658.1	XP_017329658.1 PREDICTED: uncharacterized protein LOC108268865 [Ictalurus punctatus]	Myb_DNA-bind_4	5.96e-11	Ictalurus punctatus	Chordata
TRINITY_DN18805_c0_g4_i2	2756	456	XP_026782367.2	XP_026782367.2 uncharacterized protein LOC113534007 [Pangasianodon hypophthalmus]	Myb_DNA-bind_4	2.81e-10	Pangasianodon hypophthalmus	Chordata
TRINITY_DN18805_c0_g4_i2	2756	456	PSN54095.1	PSN54095.1 hypothetical protein C0J52_03093 [Blattella germanica]	Myb_DNA-bind_4	3.09e-10	Blattella germanica	Arthropoda
TRINITY_DN18805_c0_g4_i2	2756	456	KAG7505168.1	KAG7505168.1 hypothetical protein JOB18_025081 [Solea senegalensis]	Myb_DNA-bind_4	4.58e-10	Solea senegalensis	Chordata
TRINITY_DN18805_c0_g4_i2	2756	456	XP_011689999.1	XP_011689999.1 PREDICTED: zinc finger and SCAN domain-containing protein 29-like [Wasmannia auropunctata]	Myb_DNA-bind_4	5.99e-10	Wasmannia auropunctata	Arthropoda
TRINITY_DN18805_c0_g4_i2	2756	456	CAD7196554.1	CAD7196554.1 unnamed protein product [Timema douglasi]	Myb_DNA-bind_4	3.26e-09	Timema douglasi	Arthropoda
TRINITY_DN18805_c0_g4_i2	2756	456	XP_024132497.1	XP_024132497.1 uncharacterized protein LOC112149189 [Oryzias melastigma]	Myb_DNA-bind_4	1.03e-08	Oryzias melastigma	Chordata
TRINITY_DN18805_c0_g4_i2	2756	456	TSK34856.1	TSK34856.1 hypothetical protein Baya_4464 [Bagarius yarrelli]	Myb_DNA-bind_4	1.33e-08	Bagarius yarrelli	Chordata
TRINITY_DN18805_c0_g4_i2	2756	456	RVE65103.1	RVE65103.1 hypothetical protein OJAV_G00132480 [Oryzias javanicus]	Myb_DNA-bind_4	1.96e-08	Oryzias javanicus	Chordata
TRINITY_DN18805_c0_g4_i2	2756	456	XP_012534499.1	XP_012534499.1 putative uncharacterized protein DDB_G0282499 [Monomorium pharaonis]	Myb_DNA-bind_4	2.82e-08	Monomorium pharaonis	Arthropoda
TRINITY_DN18805_c0_g4_i2	2756	456	CAD7432054.1	CAD7432054.1 unnamed protein product [Timema monikensis]	Myb_DNA-bind_4	4.38e-08	Timema monikensis	Arthropoda
TRINITY_DN18805_c0_g4_i2	2756	456	CAD7404720.1	CAD7404720.1 unnamed protein product [Timema cristinae]	Myb_DNA-bind_4	4.38e-08	Timema cristinae	Arthropoda
TRINITY_DN18805_c0_g4_i2	2756	456	XP_022166304.1	XP_022166304.1 uncharacterized protein LOC111030902 [Myzus persicae]	Myb_DNA-bind_4	4.79e-08	Myzus persicae	Arthropoda
TRINITY_DN18805_c0_g4_i2	2756	456	TNN79268.1	TNN79268.1 Zinc finger protein with KRAB and SCAN domains 2 [Liparis tanakae]	Myb_DNA-bind_4	4.84e-08	Liparis tanakae	Chordata
TRINITY_DN18805_c0_g4_i2	2756	456	CAD7573591.1	CAD7573591.1 unnamed protein product [Timema californicum]	Myb_DNA-bind_4	5.87e-08	Timema californicum	Arthropoda
TRINITY_DN18805_c0_g4_i2	2756	456	XP_011860702.1	XP_011860702.1 PREDICTED: zinc finger and SCAN domain-containing protein 29-like [Vollenhovia emeryi]	Myb_DNA-bind_4	7.02e-08	Vollenhovia emeryi	Arthropoda
TRINITY_DN18805_c0_g4_i2	2756	456	XP_030752342.1	XP_030752342.1 uncharacterized protein LOC115879588 [Sitophilus oryzae]	Myb_DNA-bind_4	7.44e-08	Sitophilus oryzae	Arthropoda
TRINITY_DN18805_c0_g4_i2	2756	456	XP_030220527.1	XP_030220527.1 trihelix transcription factor GT-3a-like [Gadus morhua]	Myb_DNA-bind_4	1.06e-07	Gadus morhua	Chordata
TRINITY_DN18805_c0_g4_i2	2756	456	XP_031327607.1	XP_031327607.1 uncharacterized protein LOC116158887 isoform X1 [Photinus pyralis]	Myb_DNA-bind_4	1.22e-07	Photinus pyralis	Arthropoda
TRINITY_DN14679_c0_g2_i2	2630	442	PNF14934.1	PNF14934.1 Jerky protein homolog-like [Cryptotermes secundus]	DDE_1	4.74e-228	Cryptotermes secundus	Arthropoda
TRINITY_DN14679_c0_g2_i2	2630	442	XP_006005016.1	XP_006005016.1 PREDICTED: jerky protein homolog-like [Latimeria chalumnae]	DDE_1	1.74e-198	Latimeria chalumnae	Chordata
TRINITY_DN14679_c0_g2_i2	2630	442	XP_036598361.1	XP_036598361.1 jerky protein homolog-like [Trichosurus vulpecula]	DDE_1	2.3e-195	Trichosurus vulpecula	Chordata
TRINITY_DN14679_c0_g2_i2	2630	442	XP_020856391.1	XP_020856391.1 jerky protein homolog-like [Phascolarctos cinereus]	DDE_1	9.49e-195	Phascolarctos cinereus	Chordata
TRINITY_DN14679_c0_g2_i2	2630	442	XP_027705170.1	XP_027705170.1 jerky protein homolog-like [Vombatus ursinus]	DDE_1	1.3e-194	Vombatus ursinus	Chordata
TRINITY_DN14679_c0_g2_i2	2630	442	XP_022906824.1	XP_022906824.1 jerky protein homolog-like [Onthophagus taurus]	DDE_1	2.6e-194	Onthophagus taurus	Arthropoda
TRINITY_DN14679_c0_g2_i2	2630	442	PNF43064.1	PNF43064.1 Jerky protein homolog-like [Cryptotermes secundus]	DDE_1	3.94e-194	Cryptotermes secundus	Arthropoda
TRINITY_DN14679_c0_g2_i2	2630	442	XP_003764343.2	XP_003764343.2 jerky protein homolog-like [Sarcophilus harrisii]	DDE_1	6.62e-194	Sarcophilus harrisii	Chordata
TRINITY_DN14679_c0_g2_i2	2630	442	XP_001367318.2	XP_001367318.2 PREDICTED: jerky protein homolog-like [Monodelphis domestica]	DDE_1	1.66e-192	Monodelphis domestica	Chordata
TRINITY_DN14679_c0_g2_i2	2630	442	XP_006833815.1	XP_006833815.1 PREDICTED: jerky protein homolog-like [Chrysochloris asiatica]	DDE_1	2.35e-192	Chrysochloris asiatica	Chordata
TRINITY_DN14679_c0_g2_i2	2630	442	XP_005633371.1	XP_005633371.1 jerky protein homolog-like [Canis lupus familiaris]	DDE_1	9.39e-192	Canis lupus familiaris;Canis lupus dingo	Chordata
TRINITY_DN14679_c0_g2_i2	2630	442	CAD7673175.1	CAD7673175.1 unnamed protein product [Nyctereutes procyonoides]	DDE_1	1.33e-191	Nyctereutes procyonoides	Chordata
TRINITY_DN14679_c0_g2_i2	2630	442	XP_025849066.1	XP_025849066.1 jerky protein homolog-like [Vulpes vulpes]	DDE_1	2.66e-191	Vulpes vulpes;Vulpes lagopus	Chordata
TRINITY_DN14679_c0_g2_i2	2630	442	XP_004754606.1	XP_004754606.1 PREDICTED: jerky protein homolog-like [Mustela putorius furo]	DDE_1	1.06e-190	Mustela putorius furo	Chordata
TRINITY_DN14679_c0_g2_i2	2630	442	XP_022369750.1	XP_022369750.1 jerky protein homolog-like [Enhydra lutris kenyoni]	DDE_1	1.5e-190	Enhydra lutris kenyoni	Chordata
TRINITY_DN14679_c0_g2_i2	2630	442	XP_034865220.1	XP_034865220.1 jerky protein homolog-like [Mirounga leonina]	DDE_1	1.5e-190	Mirounga leonina	Chordata
TRINITY_DN14679_c0_g2_i2	2630	442	XP_032216063.1	XP_032216063.1 jerky protein homolog-like [Mustela erminea]	DDE_1	1.5e-190	Mustela erminea	Chordata
TRINITY_DN14679_c0_g2_i2	2630	442	XP_004398144.1	XP_004398144.1 PREDICTED: jerky protein homolog-like [Odobenus rosmarus divergens]	DDE_1	1.5e-190	Zalophus californianus;Odobenus rosmarus divergens;Halichoerus grypus;Leptonychotes weddellii;Phoca vitulina;Neomonachus schauinslandi;Callorhinus ursinus;Eumetopias jubatus;Ursus arctos horribilis	Chordata
TRINITY_DN14679_c0_g2_i2	2630	442	XP_036620618.1	XP_036620618.1 tigger transposable element-derived protein 2 [Trichosurus vulpecula]	DDE_1	1.67e-190	Trichosurus vulpecula	Chordata
TRINITY_DN14679_c0_g2_i2	2630	442	XP_027709237.1	XP_027709237.1 tigger transposable element-derived protein 2 [Vombatus ursinus]	DDE_1	2.62e-190	Vombatus ursinus	Chordata
TRINITY_DN11708_c0_g1_i22	800	434	RXN12993.1	RXN12993.1 ac transposable element-derived 4 [Labeo rohita]	#N/A	2.15e-15	Labeo rohita	Chordata
TRINITY_DN11708_c0_g1_i22	800	434	RXN21653.1	RXN21653.1 ac transposable element-derived 4 [Labeo rohita]	#N/A	1.73e-14	Labeo rohita	Chordata
TRINITY_DN11708_c0_g1_i22	800	434	RXN38657.1	RXN38657.1 galectin-3-binding A-like protein [Labeo rohita]	#N/A	2.46e-14	Labeo rohita	Chordata
TRINITY_DN11708_c0_g1_i22	800	434	RXN15786.1	RXN15786.1 galectin-3-binding A-like protein [Labeo rohita]	#N/A	2.88e-14	Labeo rohita	Chordata
TRINITY_DN11708_c0_g1_i22	800	434	RXN38656.1	RXN38656.1 golgin subfamily A member 6C [Labeo rohita]	#N/A	3.41e-14	Labeo rohita	Chordata
TRINITY_DN11708_c0_g1_i22	800	434	KAE8278734.1	KAE8278734.1 hypothetical protein D5F01_LYC23653 [Larimichthys crocea]	#N/A	1.09e-13	Larimichthys crocea	Chordata
TRINITY_DN11708_c0_g1_i22	800	434	KAE8295252.1	KAE8295252.1 hypothetical protein D5F01_LYC06178 [Larimichthys crocea]	#N/A	1.32e-13	Larimichthys crocea	Chordata
TRINITY_DN11708_c0_g1_i22	800	434	KAE8286299.1	KAE8286299.1 hypothetical protein D5F01_LYC15984 [Larimichthys crocea]	#N/A	2.17e-13	Larimichthys crocea	Chordata
TRINITY_DN11708_c0_g1_i22	800	434	KAE8278193.1	KAE8278193.1 hypothetical protein D5F01_LYC23744 [Larimichthys crocea]	#N/A	2.21e-13	Larimichthys crocea	Chordata
TRINITY_DN11708_c0_g1_i22	800	434	KAE8287264.1	KAE8287264.1 hypothetical protein D5F01_LYC15236 [Larimichthys crocea]	#N/A	4.22e-13	Larimichthys crocea	Chordata
TRINITY_DN11708_c0_g1_i22	800	434	KAE8289671.1	KAE8289671.1 hypothetical protein D5F01_LYC11377 [Larimichthys crocea]	#N/A	5.81e-13	Larimichthys crocea	Chordata
TRINITY_DN11708_c0_g1_i22	800	434	XP_025029754.1	XP_025029754.1 uncharacterized protein LOC107326422 [Python bivittatus]	#N/A	6.92e-13	Python bivittatus	Chordata
TRINITY_DN11708_c0_g1_i22	800	434	CAB4061898.1	CAB4061898.1 unnamed protein product [Lepeophtheirus salmonis]	#N/A	2.99e-12	Lepeophtheirus salmonis	Arthropoda
TRINITY_DN11708_c0_g1_i22	800	434	XP_042325766.1	XP_042325766.1 SCAN domain-containing protein 3-like [Sceloporus undulatus]	#N/A	4.19e-12	Sceloporus undulatus	Chordata
TRINITY_DN11708_c0_g1_i22	800	434	XP_022160748.1	XP_022160748.1 protein FAM200B-like [Myzus persicae]	#N/A	7.7e-12	Myzus persicae	Arthropoda
TRINITY_DN11708_c0_g1_i22	800	434	KMQ89919.1	KMQ89919.1 hypothetical protein RF55_10387 [Lasius niger]	#N/A	1.2e-11	Lasius niger	Arthropoda
TRINITY_DN11708_c0_g1_i22	800	434	KAG7468736.1	KAG7468736.1 ac transposable element-derived 4 [Solea senegalensis]	#N/A	1.25e-11	Solea senegalensis	Chordata
TRINITY_DN11708_c0_g1_i22	800	434	XP_028566006.1	XP_028566006.1 uncharacterized protein LOC114586556 isoform X2 [Podarcis muralis]	#N/A	1.88e-11	Podarcis muralis	Chordata
TRINITY_DN11708_c0_g1_i22	800	434	XP_028566005.1	XP_028566005.1 uncharacterized protein LOC114586556 isoform X1 [Podarcis muralis]	#N/A	1.94e-11	Podarcis muralis	Chordata
TRINITY_DN11708_c0_g1_i22	800	434	XP_042311019.1	XP_042311019.1 uncharacterized protein LOC121924036 [Sceloporus undulatus]	#N/A	2.53e-11	Sceloporus undulatus	Chordata
TRINITY_DN8198_c0_g5_i1	2322	424	XP_037829333.1	XP_037829333.1 E3 SUMO-protein ligase ZBED1-like [Kryptolebias marmoratus]	Dimer_Tnp_hAT	2.81e-17	Kryptolebias marmoratus	Chordata
TRINITY_DN8198_c0_g5_i1	2322	424	XP_039593879.1	XP_039593879.1 zinc finger BED domain-containing protein 4-like [Polypterus senegalus]	Dimer_Tnp_hAT	4.95e-17	Polypterus senegalus	Chordata
TRINITY_DN8198_c0_g5_i1	2322	424	XP_005162058.1	XP_005162058.1 zinc finger BED domain-containing protein 4 isoform X3 [Danio rerio]	Dimer_Tnp_hAT	2.11e-16	Danio rerio	Chordata
TRINITY_DN8198_c0_g5_i1	2322	424	XP_039630381.1	XP_039630381.1 zinc finger BED domain-containing protein 4-like [Polypterus senegalus]	Dimer_Tnp_hAT	2.21e-16	Polypterus senegalus	Chordata
TRINITY_DN8198_c0_g5_i1	2322	424	XP_039594462.1	XP_039594462.1 zinc finger BED domain-containing protein 4-like [Polypterus senegalus]	Dimer_Tnp_hAT	6.31e-16	Polypterus senegalus	Chordata
TRINITY_DN8198_c0_g5_i1	2322	424	CAD7393468.1	CAD7393468.1 unnamed protein product [Timema cristinae]	Dimer_Tnp_hAT	1.29e-15	Timema cristinae	Arthropoda
TRINITY_DN8198_c0_g5_i1	2322	424	XP_039619524.1	XP_039619524.1 zinc finger BED domain-containing protein 4-like [Polypterus senegalus]	Dimer_Tnp_hAT	1.62e-15	Polypterus senegalus	Chordata
TRINITY_DN8198_c0_g5_i1	2322	424	XP_039598715.1	XP_039598715.1 zinc finger BED domain-containing protein 4-like [Polypterus senegalus]	Dimer_Tnp_hAT	1.68e-15	Polypterus senegalus	Chordata
TRINITY_DN8198_c0_g5_i1	2322	424	XP_039592492.1	XP_039592492.1 zinc finger BED domain-containing protein 4-like [Polypterus senegalus]	Dimer_Tnp_hAT	1.85e-15	Polypterus senegalus	Chordata
TRINITY_DN8198_c0_g5_i1	2322	424	XP_024118736.1	XP_024118736.1 zinc finger BED domain-containing protein 1-like [Oryzias melastigma]	Dimer_Tnp_hAT	2.1e-15	Oryzias melastigma	Chordata
TRINITY_DN8198_c0_g5_i1	2322	424	XP_039654390.1	XP_039654390.1 E3 SUMO-protein ligase ZBED1-like [Perca fluviatilis]	Dimer_Tnp_hAT	2.39e-15	Perca fluviatilis	Chordata
TRINITY_DN8198_c0_g5_i1	2322	424	XP_033933530.1	XP_033933530.1 zinc finger BED domain-containing protein 1-like [Pseudochaenichthys georgianus]	Dimer_Tnp_hAT	2.49e-15	Pseudochaenichthys georgianus	Chordata
TRINITY_DN8198_c0_g5_i1	2322	424	XP_039601207.1	XP_039601207.1 zinc finger BED domain-containing protein 4-like [Polypterus senegalus]	Dimer_Tnp_hAT	2.95e-15	Polypterus senegalus	Chordata
TRINITY_DN8198_c0_g5_i1	2322	424	XP_026138409.1	XP_026138409.1 zinc finger BED domain-containing protein 1-like [Carassius auratus]	Dimer_Tnp_hAT	4.19e-15	Carassius auratus	Chordata
TRINITY_DN8198_c0_g5_i1	2322	424	XP_033946641.1	XP_033946641.1 zinc finger BED domain-containing protein 1-like [Pseudochaenichthys georgianus]	Dimer_Tnp_hAT	4.19e-15	Pseudochaenichthys georgianus	Chordata
TRINITY_DN8198_c0_g5_i1	2322	424	XP_039616947.1	XP_039616947.1 zinc finger BED domain-containing protein 4-like [Polypterus senegalus]	Dimer_Tnp_hAT	7.39e-15	Polypterus senegalus	Chordata
TRINITY_DN8198_c0_g5_i1	2322	424	CAD7258954.1	CAD7258954.1 unnamed protein product [Timema shepardi]	Dimer_Tnp_hAT	7.42e-15	Timema shepardi	Arthropoda
TRINITY_DN8198_c0_g5_i1	2322	424	KAG5685994.1	KAG5685994.1 hypothetical protein BaRGS_028327 [Batillaria attramentaria]	Dimer_Tnp_hAT	8.12e-15	Batillaria attramentaria	Mollusca
TRINITY_DN8198_c0_g5_i1	2322	424	XP_041847936.1	XP_041847936.1 zinc finger BED domain-containing protein 4-like [Melanotaenia boesemani]	Dimer_Tnp_hAT	8.27e-15	Melanotaenia boesemani	Chordata
TRINITY_DN8198_c0_g5_i1	2322	424	XP_009030743.1	XP_009030743.1 hypothetical protein HELRODRAFT_90391 [Helobdella robusta]	Dimer_Tnp_hAT	9.56e-15	Helobdella robusta	Annelida
TRINITY_DN8304_c0_g2_i15	3391	422	XP_008103963.1	XP_008103963.1 PREDICTED: jerky protein homolog-like isoform X2 [Anolis carolinensis]	rve superfamily	5.74e-171	Anolis carolinensis	Chordata
TRINITY_DN8304_c0_g2_i15	3391	422	XP_016847311.1	XP_016847311.1 PREDICTED: jerky protein homolog-like isoform X1 [Anolis carolinensis]	rve superfamily	8.16e-171	Anolis carolinensis	Chordata
TRINITY_DN8304_c0_g2_i15	3391	422	XP_008119844.1	XP_008119844.1 PREDICTED: jerky protein homolog-like [Anolis carolinensis]	rve superfamily	4.49e-164	Anolis carolinensis	Chordata
TRINITY_DN8304_c0_g2_i15	3391	422	XP_011861520.1	XP_011861520.1 PREDICTED: jerky protein homolog-like isoform X1 [Vollenhovia emeryi]	rve superfamily	3.58e-161	Vollenhovia emeryi	Arthropoda
TRINITY_DN8304_c0_g2_i15	3391	422	KAF7249719.1	KAF7249719.1 Plexin-D1 [Varanus komodoensis]	rve superfamily	8.11e-160	Varanus komodoensis	Chordata
TRINITY_DN8304_c0_g2_i15	3391	422	XP_016846335.1	XP_016846335.1 PREDICTED: uncharacterized protein LOC103277513 [Anolis carolinensis]	rve superfamily	3.04e-159	Anolis carolinensis	Chordata
TRINITY_DN8304_c0_g2_i15	3391	422	XP_029173702.1	XP_029173702.1 jerky protein homolog-like [Nylanderia fulva]	rve superfamily	3.06e-159	Nylanderia fulva	Arthropoda
TRINITY_DN8304_c0_g2_i15	3391	422	XP_008119843.1	XP_008119843.1 PREDICTED: zinc finger protein with KRAB and SCAN domains 7 [Anolis carolinensis]	rve superfamily	6.72e-155	Anolis carolinensis	Chordata
TRINITY_DN8304_c0_g2_i15	3391	422	XP_015928749.1	XP_015928749.1 jerky protein homolog-like [Parasteatoda tepidariorum]	rve superfamily	1.94e-151	Parasteatoda tepidariorum	Arthropoda
TRINITY_DN8304_c0_g2_i15	3391	422	XP_029176761.1	XP_029176761.1 jerky protein homolog-like [Nylanderia fulva]	rve superfamily	1.46e-148	Nylanderia fulva	Arthropoda
TRINITY_DN8304_c0_g2_i15	3391	422	XP_023231971.1	XP_023231971.1 jerky protein homolog-like [Centruroides sculpturatus]	rve superfamily	1.72e-145	Centruroides sculpturatus	Arthropoda
TRINITY_DN8304_c0_g2_i15	3391	422	VEN49859.1	VEN49859.1 unnamed protein product [Callosobruchus maculatus]	rve superfamily	6.97e-144	Callosobruchus maculatus	Arthropoda
TRINITY_DN8304_c0_g2_i15	3391	422	VEN42838.1	VEN42838.1 unnamed protein product [Callosobruchus maculatus]	rve superfamily	1.37e-143	Callosobruchus maculatus	Arthropoda
TRINITY_DN8304_c0_g2_i15	3391	422	XP_018574376.1	XP_018574376.1 jerky protein homolog-like [Anoplophora glabripennis]	rve superfamily	1.87e-143	Anoplophora glabripennis	Arthropoda
TRINITY_DN8304_c0_g2_i15	3391	422	VEN43486.1	VEN43486.1 unnamed protein product [Callosobruchus maculatus]	rve superfamily	3.8e-143	Callosobruchus maculatus	Arthropoda
TRINITY_DN8304_c0_g2_i15	3391	422	XP_028664086.1	XP_028664086.1 jerky protein homolog-like [Erpetoichthys calabaricus]	rve superfamily	1.78e-140	Erpetoichthys calabaricus	Chordata
TRINITY_DN8304_c0_g2_i15	3391	422	XP_001944491.1	XP_001944491.1 jerky protein homolog-like [Acyrthosiphon pisum]	rve superfamily	7.05e-139	Acyrthosiphon pisum	Arthropoda
TRINITY_DN8304_c0_g2_i15	3391	422	XP_028648386.1	XP_028648386.1 jerky protein homolog-like [Erpetoichthys calabaricus]	rve superfamily	7.15e-139	Erpetoichthys calabaricus	Chordata
TRINITY_DN8304_c0_g2_i15	3391	422	XP_028681081.1	XP_028681081.1 jerky protein homolog-like [Erpetoichthys calabaricus]	rve superfamily	1.04e-138	Erpetoichthys calabaricus	Chordata
TRINITY_DN8304_c0_g2_i15	3391	422	XP_028674359.1	XP_028674359.1 jerky protein homolog-like [Erpetoichthys calabaricus]	rve superfamily	1.5e-138	Erpetoichthys calabaricus	Chordata
TRINITY_DN5126_c0_g1_i2	3468	418	XP_026693613.1	XP_026693613.1 uncharacterized protein LOC101242320 [Ciona intestinalis]	P-loop_NTPase superfamily	1.54e-31	Ciona intestinalis	Chordata
TRINITY_DN5126_c0_g1_i2	3468	418	XP_026693612.1	XP_026693612.1 atlastin-2-like isoform X2 [Ciona intestinalis]	P-loop_NTPase superfamily	1.79e-31	Ciona intestinalis	Chordata
TRINITY_DN5126_c0_g1_i2	3468	418	XP_018670535.1	XP_018670535.1 atlastin-2-like isoform X1 [Ciona intestinalis]	P-loop_NTPase superfamily	3.19e-31	Ciona intestinalis	Chordata
TRINITY_DN5126_c0_g1_i2	3468	418	XP_039256310.1	XP_039256310.1 atlastin-3-like [Styela clava]	P-loop_NTPase superfamily	3.78e-31	Styela clava	Chordata
TRINITY_DN5126_c0_g1_i2	3468	418	XP_022335973.1	XP_022335973.1 atlastin-2-like isoform X3 [Crassostrea virginica]	P-loop_NTPase superfamily	6.67e-30	Crassostrea virginica	Mollusca
TRINITY_DN5126_c0_g1_i2	3468	418	KAF7707351.1	KAF7707351.1 hypothetical protein HF521_018569 [Silurus meridionalis]	P-loop_NTPase superfamily	6.68e-30	Silurus meridionalis	Chordata
TRINITY_DN5126_c0_g1_i2	3468	418	XP_037531165.1	XP_037531165.1 atlastin-3 [Nematolebias whitei]	P-loop_NTPase superfamily	8.96e-30	Nematolebias whitei	Chordata
TRINITY_DN5126_c0_g1_i2	3468	418	XP_015795562.1	XP_015795562.1 atlastin-2-like [Tetranychus urticae]	P-loop_NTPase superfamily	4.79e-29	Tetranychus urticae	Arthropoda
TRINITY_DN5126_c0_g1_i2	3468	418	XP_037289386.1	XP_037289386.1 atlastin-2-like [Rhipicephalus microplus]	P-loop_NTPase superfamily	7.72e-29	Rhipicephalus microplus	Arthropoda
TRINITY_DN5126_c0_g1_i2	3468	418	XP_022335971.1	XP_022335971.1 atlastin-2-like isoform X1 [Crassostrea virginica]	P-loop_NTPase superfamily	8.92e-29	Crassostrea virginica	Mollusca
TRINITY_DN5126_c0_g1_i2	3468	418	XP_041846488.1	XP_041846488.1 atlastin-3 [Melanotaenia boesemani]	P-loop_NTPase superfamily	9.37e-29	Melanotaenia boesemani	Chordata
TRINITY_DN5126_c0_g1_i2	3468	418	KAG8564186.1	KAG8564186.1 hypothetical protein GDO81_016359 [Engystomops pustulosus]	P-loop_NTPase superfamily	2.14e-28	Engystomops pustulosus	Chordata
TRINITY_DN5126_c0_g1_i2	3468	418	XP_013860938.1	XP_013860938.1 PREDICTED: atlastin-3-like [Austrofundulus limnaeus]	P-loop_NTPase superfamily	2.26e-28	Austrofundulus limnaeus	Chordata
TRINITY_DN5126_c0_g1_i2	3468	418	XP_036424594.1	XP_036424594.1 atlastin-3 [Colossoma macropomum]	P-loop_NTPase superfamily	2.26e-28	Colossoma macropomum	Chordata
TRINITY_DN5126_c0_g1_i2	3468	418	XP_022335974.1	XP_022335974.1 atlastin-2-like isoform X4 [Crassostrea virginica]	P-loop_NTPase superfamily	2.26e-28	Crassostrea virginica	Mollusca
TRINITY_DN5126_c0_g1_i2	3468	418	KAF0300753.1	KAF0300753.1 Atlastin [Amphibalanus amphitrite]	P-loop_NTPase superfamily	2.74e-28	Amphibalanus amphitrite	Arthropoda
TRINITY_DN5126_c0_g1_i2	3468	418	XP_037272400.1	XP_037272400.1 atlastin-1-like [Rhipicephalus microplus]	P-loop_NTPase superfamily	2.83e-28	Rhipicephalus microplus	Arthropoda
TRINITY_DN5126_c0_g1_i2	3468	418	XP_041800093.1	XP_041800093.1 atlastin-3 [Chelmon rostratus]	P-loop_NTPase superfamily	4.05e-28	Chelmon rostratus	Chordata
TRINITY_DN5126_c0_g1_i2	3468	418	XP_031633397.1	XP_031633397.1 atlastin-like [Contarinia nasturtii]	P-loop_NTPase superfamily	7.14e-28	Contarinia nasturtii	Arthropoda
TRINITY_DN5126_c0_g1_i2	3468	418	XP_028445193.1	XP_028445193.1 atlastin-3-like [Perca flavescens]	P-loop_NTPase superfamily	7.28e-28	Perca flavescens	Chordata
TRINITY_DN9228_c0_g1_i6	3065	402	XP_008103963.1	XP_008103963.1 PREDICTED: jerky protein homolog-like isoform X2 [Anolis carolinensis]	rve superfamily	5.24e-215	Anolis carolinensis	Chordata
TRINITY_DN9228_c0_g1_i6	3065	402	XP_016847311.1	XP_016847311.1 PREDICTED: jerky protein homolog-like isoform X1 [Anolis carolinensis]	rve superfamily	7.6e-215	Anolis carolinensis	Chordata
TRINITY_DN9228_c0_g1_i6	3065	402	XP_008119844.1	XP_008119844.1 PREDICTED: jerky protein homolog-like [Anolis carolinensis]	rve superfamily	3.26e-214	Anolis carolinensis	Chordata
TRINITY_DN9228_c0_g1_i6	3065	402	XP_008119843.1	XP_008119843.1 PREDICTED: zinc finger protein with KRAB and SCAN domains 7 [Anolis carolinensis]	rve superfamily	1.7e-203	Anolis carolinensis	Chordata
TRINITY_DN9228_c0_g1_i6	3065	402	XP_016846335.1	XP_016846335.1 PREDICTED: uncharacterized protein LOC103277513 [Anolis carolinensis]	rve superfamily	1.27e-202	Anolis carolinensis	Chordata
TRINITY_DN9228_c0_g1_i6	3065	402	XP_028660410.1	XP_028660410.1 jerky protein homolog-like [Erpetoichthys calabaricus]	rve superfamily	4.26e-176	Erpetoichthys calabaricus	Chordata
TRINITY_DN9228_c0_g1_i6	3065	402	XP_023231971.1	XP_023231971.1 jerky protein homolog-like [Centruroides sculpturatus]	rve superfamily	2.39e-175	Centruroides sculpturatus	Arthropoda
TRINITY_DN9228_c0_g1_i6	3065	402	KAF7249719.1	KAF7249719.1 Plexin-D1 [Varanus komodoensis]	rve superfamily	3.46e-175	Varanus komodoensis	Chordata
TRINITY_DN9228_c0_g1_i6	3065	402	XP_028659020.1	XP_028659020.1 jerky protein homolog-like [Erpetoichthys calabaricus]	rve superfamily	4.64e-175	Erpetoichthys calabaricus	Chordata
TRINITY_DN9228_c0_g1_i6	3065	402	XP_042315488.1	XP_042315488.1 jerky protein homolog-like [Sceloporus undulatus]	rve superfamily	1.35e-169	Sceloporus undulatus	Chordata
TRINITY_DN9228_c0_g1_i6	3065	402	XP_011861520.1	XP_011861520.1 PREDICTED: jerky protein homolog-like isoform X1 [Vollenhovia emeryi]	rve superfamily	4.92e-161	Vollenhovia emeryi	Arthropoda
TRINITY_DN9228_c0_g1_i6	3065	402	XP_029173702.1	XP_029173702.1 jerky protein homolog-like [Nylanderia fulva]	rve superfamily	5.46e-160	Nylanderia fulva	Arthropoda
TRINITY_DN9228_c0_g1_i6	3065	402	XP_015928749.1	XP_015928749.1 jerky protein homolog-like [Parasteatoda tepidariorum]	rve superfamily	7.75e-159	Parasteatoda tepidariorum	Arthropoda
TRINITY_DN9228_c0_g1_i6	3065	402	GFR09827.1	GFR09827.1 jerky protein homolog-like [Trichonephila clavata]	rve superfamily	9.15e-157	Trichonephila clavata	Arthropoda
TRINITY_DN9228_c0_g1_i6	3065	402	GFU88659.1	GFU88659.1 jerky protein homolog-like [Trichonephila clavipes]	rve superfamily	2e-155	Trichonephila clavipes	Arthropoda
TRINITY_DN9228_c0_g1_i6	3065	402	XP_042295721.1	XP_042295721.1 jerky protein homolog-like [Sceloporus undulatus]	rve superfamily	2.59e-150	Sceloporus undulatus	Chordata
TRINITY_DN9228_c0_g1_i6	3065	402	XP_028664086.1	XP_028664086.1 jerky protein homolog-like [Erpetoichthys calabaricus]	rve superfamily	7.86e-149	Erpetoichthys calabaricus	Chordata
TRINITY_DN9228_c0_g1_i6	3065	402	XP_029176761.1	XP_029176761.1 jerky protein homolog-like [Nylanderia fulva]	rve superfamily	6.49e-148	Nylanderia fulva	Arthropoda
TRINITY_DN9228_c0_g1_i6	3065	402	XP_028660442.1	XP_028660442.1 jerky protein homolog-like [Erpetoichthys calabaricus]	rve superfamily	3.37e-147	Erpetoichthys calabaricus	Chordata
TRINITY_DN9228_c0_g1_i6	3065	402	XP_028674359.1	XP_028674359.1 jerky protein homolog-like [Erpetoichthys calabaricus]	rve superfamily	4.9e-147	Erpetoichthys calabaricus	Chordata
TRINITY_DN10410_c0_g1_i1	982	390	XP_026782367.2	XP_026782367.2 uncharacterized protein LOC113534007 [Pangasianodon hypophthalmus]	Myb_DNA-bind_4	1.38e-12	Pangasianodon hypophthalmus	Chordata
TRINITY_DN10410_c0_g1_i1	982	390	XP_030220527.1	XP_030220527.1 trihelix transcription factor GT-3a-like [Gadus morhua]	Myb_DNA-bind_4	3.27e-08	Gadus morhua	Chordata
TRINITY_DN10410_c0_g1_i1	982	390	XP_012534499.1	XP_012534499.1 putative uncharacterized protein DDB_G0282499 [Monomorium pharaonis]	Myb_DNA-bind_4	3.83e-08	Monomorium pharaonis	Arthropoda
TRINITY_DN10410_c0_g1_i1	982	390	KAF4088108.1	KAF4088108.1 hypothetical protein AMELA_G00079120 [Ameiurus melas]	Myb_DNA-bind_4	4.25e-08	Ameiurus melas	Chordata
TRINITY_DN10410_c0_g1_i1	982	390	XP_017329658.1	XP_017329658.1 PREDICTED: uncharacterized protein LOC108268865 [Ictalurus punctatus]	Myb_DNA-bind_4	6.19e-08	Ictalurus punctatus	Chordata
TRINITY_DN10410_c0_g1_i1	982	390	PSN54095.1	PSN54095.1 hypothetical protein C0J52_03093 [Blattella germanica]	Myb_DNA-bind_4	1.06e-07	Blattella germanica	Arthropoda
TRINITY_DN10410_c0_g1_i1	982	390	XP_039311851.1	XP_039311851.1 zinc finger and SCAN domain-containing protein 20 isoform X2 [Solenopsis invicta]	Myb_DNA-bind_4	1.7e-07	Solenopsis invicta	Arthropoda
TRINITY_DN10410_c0_g1_i1	982	390	XP_039311850.1	XP_039311850.1 zinc finger and SCAN domain-containing protein 20 isoform X1 [Solenopsis invicta]	Myb_DNA-bind_4	1.75e-07	Solenopsis invicta	Arthropoda
TRINITY_DN10410_c0_g1_i1	982	390	KAF0759464.1	KAF0759464.1 Uncharacterized protein FWK35_00006110 [Aphis craccivora]	Myb_DNA-bind_4	2.49e-07	Aphis craccivora	Arthropoda
TRINITY_DN10410_c0_g1_i1	982	390	KAG5844131.1	KAG5844131.1 hypothetical protein ANANG_G00158250 [Anguilla anguilla]	Myb_DNA-bind_4	3.22e-07	Anguilla anguilla	Chordata
TRINITY_DN10410_c0_g1_i1	982	390	XP_035289912.1	XP_035289912.1 uncharacterized protein LOC118236024 isoform X1 [Anguilla anguilla]	Myb_DNA-bind_4	3.99e-07	Anguilla anguilla	Chordata
TRINITY_DN10410_c0_g1_i1	982	390	XP_042301704.1	XP_042301704.1 uncharacterized protein LOC121919304 [Sceloporus undulatus]	Myb_DNA-bind_4	4.77e-07	Sceloporus undulatus	Chordata
TRINITY_DN10410_c0_g1_i1	982	390	XP_024886594.1	XP_024886594.1 zinc finger and SCAN domain-containing protein 20-like, partial [Temnothorax curvispinosus]	Myb_DNA-bind_4	6.23e-07	Temnothorax curvispinosus	Arthropoda
TRINITY_DN10410_c0_g1_i1	982	390	XP_011689999.1	XP_011689999.1 PREDICTED: zinc finger and SCAN domain-containing protein 29-like [Wasmannia auropunctata]	Myb_DNA-bind_4	7.14e-07	Wasmannia auropunctata	Arthropoda
TRINITY_DN10410_c0_g1_i1	982	390	XP_031327607.1	XP_031327607.1 uncharacterized protein LOC116158887 isoform X1 [Photinus pyralis]	Myb_DNA-bind_4	7.83e-07	Photinus pyralis	Arthropoda
TRINITY_DN10410_c0_g1_i1	982	390	CAD7196554.1	CAD7196554.1 unnamed protein product [Timema douglasi]	Myb_DNA-bind_4	1.06e-06	Timema douglasi	Arthropoda
TRINITY_DN10410_c0_g1_i1	982	390	CAD7434204.1	CAD7434204.1 unnamed protein product [Timema monikensis]	Myb_DNA-bind_4	1.08e-06	Timema monikensis	Arthropoda
TRINITY_DN10410_c0_g1_i1	982	390	CAD7267725.1	CAD7267725.1 unnamed protein product [Timema shepardi]	Myb_DNA-bind_4	1.09e-06	Timema shepardi	Arthropoda
TRINITY_DN10410_c0_g1_i1	982	390	XP_035890859.1	XP_035890859.1 zinc finger protein with KRAB and SCAN domains 2-like [Anopheles stephensi]	Myb_DNA-bind_4	1.25e-06	Anopheles stephensi	Arthropoda
TRINITY_DN10410_c0_g1_i1	982	390	XP_025602208.1	XP_025602208.1 zinc finger and SCAN domain-containing protein 29-like [Athalia rosae]	Myb_DNA-bind_4	1.96e-06	Athalia rosae	Arthropoda
TRINITY_DN8304_c0_g2_i24	2807	376	XP_008103963.1	XP_008103963.1 PREDICTED: jerky protein homolog-like isoform X2 [Anolis carolinensis]	rve superfamily	2.8e-173	Anolis carolinensis	Chordata
TRINITY_DN8304_c0_g2_i24	2807	376	XP_016847311.1	XP_016847311.1 PREDICTED: jerky protein homolog-like isoform X1 [Anolis carolinensis]	rve superfamily	3.98e-173	Anolis carolinensis	Chordata
TRINITY_DN8304_c0_g2_i24	2807	376	XP_008119844.1	XP_008119844.1 PREDICTED: jerky protein homolog-like [Anolis carolinensis]	rve superfamily	2.32e-166	Anolis carolinensis	Chordata
TRINITY_DN8304_c0_g2_i24	2807	376	XP_011861520.1	XP_011861520.1 PREDICTED: jerky protein homolog-like isoform X1 [Vollenhovia emeryi]	rve superfamily	2.13e-163	Vollenhovia emeryi	Arthropoda
TRINITY_DN8304_c0_g2_i24	2807	376	KAF7249719.1	KAF7249719.1 Plexin-D1 [Varanus komodoensis]	rve superfamily	4.43e-162	Varanus komodoensis	Chordata
TRINITY_DN8304_c0_g2_i24	2807	376	XP_016846335.1	XP_016846335.1 PREDICTED: uncharacterized protein LOC103277513 [Anolis carolinensis]	rve superfamily	1.51e-161	Anolis carolinensis	Chordata
TRINITY_DN8304_c0_g2_i24	2807	376	XP_029173702.1	XP_029173702.1 jerky protein homolog-like [Nylanderia fulva]	rve superfamily	1.88e-161	Nylanderia fulva	Arthropoda
TRINITY_DN8304_c0_g2_i24	2807	376	XP_008119843.1	XP_008119843.1 PREDICTED: zinc finger protein with KRAB and SCAN domains 7 [Anolis carolinensis]	rve superfamily	3.9e-157	Anolis carolinensis	Chordata
TRINITY_DN8304_c0_g2_i24	2807	376	XP_015928749.1	XP_015928749.1 jerky protein homolog-like [Parasteatoda tepidariorum]	rve superfamily	1.41e-153	Parasteatoda tepidariorum	Arthropoda
TRINITY_DN8304_c0_g2_i24	2807	376	XP_029176761.1	XP_029176761.1 jerky protein homolog-like [Nylanderia fulva]	rve superfamily	1.14e-150	Nylanderia fulva	Arthropoda
TRINITY_DN8304_c0_g2_i24	2807	376	XP_023231971.1	XP_023231971.1 jerky protein homolog-like [Centruroides sculpturatus]	rve superfamily	1.42e-147	Centruroides sculpturatus	Arthropoda
TRINITY_DN8304_c0_g2_i24	2807	376	VEN49859.1	VEN49859.1 unnamed protein product [Callosobruchus maculatus]	rve superfamily	5.94e-146	Callosobruchus maculatus	Arthropoda
TRINITY_DN8304_c0_g2_i24	2807	376	VEN42838.1	VEN42838.1 unnamed protein product [Callosobruchus maculatus]	rve superfamily	1.18e-145	Callosobruchus maculatus	Arthropoda
TRINITY_DN8304_c0_g2_i24	2807	376	XP_018574376.1	XP_018574376.1 jerky protein homolog-like [Anoplophora glabripennis]	rve superfamily	1.61e-145	Anoplophora glabripennis	Arthropoda
TRINITY_DN8304_c0_g2_i24	2807	376	VEN43486.1	VEN43486.1 unnamed protein product [Callosobruchus maculatus]	rve superfamily	3.29e-145	Callosobruchus maculatus	Arthropoda
TRINITY_DN8304_c0_g2_i24	2807	376	XP_028664086.1	XP_028664086.1 jerky protein homolog-like [Erpetoichthys calabaricus]	rve superfamily	1.64e-142	Erpetoichthys calabaricus	Chordata
TRINITY_DN8304_c0_g2_i24	2807	376	XP_001944491.1	XP_001944491.1 jerky protein homolog-like [Acyrthosiphon pisum]	rve superfamily	6.74e-141	Acyrthosiphon pisum	Arthropoda
TRINITY_DN8304_c0_g2_i24	2807	376	XP_028648386.1	XP_028648386.1 jerky protein homolog-like [Erpetoichthys calabaricus]	rve superfamily	6.86e-141	Erpetoichthys calabaricus	Chordata
TRINITY_DN8304_c0_g2_i24	2807	376	XP_028681081.1	XP_028681081.1 jerky protein homolog-like [Erpetoichthys calabaricus]	rve superfamily	9.97e-141	Erpetoichthys calabaricus	Chordata
TRINITY_DN8304_c0_g2_i24	2807	376	XP_028674359.1	XP_028674359.1 jerky protein homolog-like [Erpetoichthys calabaricus]	rve superfamily	1.45e-140	Erpetoichthys calabaricus	Chordata
TRINITY_DN36652_c0_g1_i1	785	362	XP_014345904.1	XP_014345904.1 PREDICTED: hepatic lectin-like isoform X2 [Latimeria chalumnae]	CLECT	6.5e-19	Latimeria chalumnae	Chordata
TRINITY_DN36652_c0_g1_i1	785	362	XP_014345903.1	XP_014345903.1 PREDICTED: hepatic lectin-like isoform X1 [Latimeria chalumnae]	CLECT	1.1e-18	Latimeria chalumnae	Chordata
TRINITY_DN36652_c0_g1_i1	785	362	XP_032092216.1	XP_032092216.1 C-type lectin LmsL-like [Thamnophis elegans]	CLECT	1.47e-18	Thamnophis elegans	Chordata
TRINITY_DN36652_c0_g1_i1	785	362	XP_026154600.1	XP_026154600.1 ladderlectin-like [Mastacembelus armatus]	CLECT	1.4e-16	Mastacembelus armatus	Chordata
TRINITY_DN36652_c0_g1_i1	785	362	XP_038629989.1	XP_038629989.1 C-type lectin domain family 4 member E-like [Scyliorhinus canicula]	CLECT	9.16e-16	Scyliorhinus canicula	Chordata
TRINITY_DN36652_c0_g1_i1	785	362	XP_035860995.1	XP_035860995.1 lactose-binding lectin l-2-like [Sander lucioperca]	CLECT	1.31e-15	Sander lucioperca	Chordata
TRINITY_DN36652_c0_g1_i1	785	362	XP_039206064.1	XP_039206064.1 C-type lectin BpLec-like [Crotalus tigris]	CLECT	1.66e-15	Crotalus tigris	Chordata
TRINITY_DN36652_c0_g1_i1	785	362	XP_038629196.1	XP_038629196.1 C-type lectin domain family 17, member A-like [Scyliorhinus canicula]	CLECT	2.86e-15	Scyliorhinus canicula	Chordata
TRINITY_DN36652_c0_g1_i1	785	362	XP_039206122.1	XP_039206122.1 C-type lectin BpLec-like [Crotalus tigris]	CLECT	3.23e-15	Crotalus tigris	Chordata
TRINITY_DN36652_c0_g1_i1	785	362	XP_019528444.2	XP_019528444.2 perlucin-like protein [Aedes albopictus]	CLECT	3.46e-15	Aedes albopictus	Arthropoda
TRINITY_DN36652_c0_g1_i1	785	362	XP_034246645.1	XP_034246645.1 C-type lectin 37Db-like [Thrips palmi]	CLECT	7.22e-15	Thrips palmi	Arthropoda
TRINITY_DN36652_c0_g1_i1	785	362	XP_026181715.1	XP_026181715.1 ladderlectin-like isoform X2 [Mastacembelus armatus]	CLECT	7.59e-15	Mastacembelus armatus	Chordata
TRINITY_DN36652_c0_g1_i1	785	362	XP_026181706.1	XP_026181706.1 ladderlectin-like isoform X1 [Mastacembelus armatus]	CLECT	7.59e-15	Mastacembelus armatus	Chordata
TRINITY_DN36652_c0_g1_i1	785	362	XP_041673734.1	XP_041673734.1 C-type lectin 37Da-like [Drosophila eugracilis]	CLECT	7.76e-15	Drosophila eugracilis	Arthropoda
TRINITY_DN36652_c0_g1_i1	785	362	ABD60990.1	ABD60990.1 lectin [Glossina morsitans morsitans]	CLECT	7.93e-15	Glossina morsitans morsitans	Arthropoda
TRINITY_DN36652_c0_g1_i1	785	362	XP_041036042.1	XP_041036042.1 hepatic lectin-like [Carcharodon carcharias]	CLECT	8.11e-15	Carcharodon carcharias	Chordata
TRINITY_DN36652_c0_g1_i1	785	362	XP_039461048.1	XP_039461048.1 lactose-binding lectin l-2-like [Oreochromis aureus]	CLECT	9.18e-15	Oreochromis aureus	Chordata
TRINITY_DN36652_c0_g1_i1	785	362	XP_025069092.1	XP_025069092.1 C-type lectin domain family 4 member F-like [Alligator sinensis]	CLECT	9.19e-15	Alligator sinensis	Chordata
TRINITY_DN36652_c0_g1_i1	785	362	AEQ16379.1	AEQ16379.1 perlucin 5 [Haliotis diversicolor]	CLECT	9.61e-15	Haliotis diversicolor	Mollusca
TRINITY_DN36652_c0_g1_i1	785	362	XP_019205876.1	XP_019205876.1 lactose-binding lectin l-2-like [Oreochromis niloticus]	CLECT	1.1e-14	Oreochromis niloticus	Chordata
TRINITY_DN24728_c0_g1_i1	3976	356	XP_040270037.1	XP_040270037.1 zinc finger MYM-type protein 1-like [Bufo bufo]	DUF4371 superfamily	3.3e-266	Bufo bufo	Chordata
TRINITY_DN24728_c0_g1_i1	3976	356	OCT96206.1	OCT96206.1 hypothetical protein XELAEV_18013881mg [Xenopus laevis]	DUF4371 superfamily	8.97e-263	Xenopus laevis	Chordata
TRINITY_DN24728_c0_g1_i1	3976	356	XP_034069746.1	XP_034069746.1 zinc finger MYM-type protein 1-like [Gymnodraco acuticeps]	DUF4371 superfamily	2.89e-262	Gymnodraco acuticeps	Chordata
TRINITY_DN24728_c0_g1_i1	3976	356	XP_015927061.1	XP_015927061.1 zinc finger MYM-type protein 1-like [Parasteatoda tepidariorum]	DUF4371 superfamily	4.63e-233	Parasteatoda tepidariorum	Arthropoda
TRINITY_DN24728_c0_g1_i1	3976	356	XP_034061602.1	XP_034061602.1 zinc finger MYM-type protein 1-like [Gymnodraco acuticeps]	DUF4371 superfamily	2.58e-227	Gymnodraco acuticeps	Chordata
TRINITY_DN24728_c0_g1_i1	3976	356	XP_038210847.1	XP_038210847.1 zinc finger MYM-type protein 1-like [Zerene cesonia]	DUF4371 superfamily	3.95e-226	Zerene cesonia	Arthropoda
TRINITY_DN24728_c0_g1_i1	3976	356	KAE9533683.1	KAE9533683.1 hypothetical protein AGLY_009032 [Aphis glycines]	DUF4371 superfamily	3.01e-223	Aphis glycines	Arthropoda
TRINITY_DN24728_c0_g1_i1	3976	356	XP_042308880.1	XP_042308880.1 zinc finger MYM-type protein 1-like isoform X1 [Sceloporus undulatus]	DUF4371 superfamily	7.04e-215	Sceloporus undulatus	Chordata
TRINITY_DN24728_c0_g1_i1	3976	356	KAG8540294.1	KAG8540294.1 hypothetical protein GDO81_019541 [Engystomops pustulosus]	DUF4371 superfamily	4.69e-213	Engystomops pustulosus	Chordata
TRINITY_DN24728_c0_g1_i1	3976	356	XP_026481391.1	XP_026481391.1 zinc finger MYM-type protein 1-like [Ctenocephalides felis]	DUF4371 superfamily	1.37e-211	Ctenocephalides felis	Arthropoda
TRINITY_DN24728_c0_g1_i1	3976	356	KAG8275955.1	KAG8275955.1 hypothetical protein J6590_108280 [Homalodisca vitripennis]	DUF4371 superfamily	1.4e-208	Homalodisca vitripennis	Arthropoda
TRINITY_DN24728_c0_g1_i1	3976	356	XP_034088842.1	XP_034088842.1 zinc finger MYM-type protein 1-like [Gymnodraco acuticeps]	DUF4371 superfamily	4.63e-206	Gymnodraco acuticeps	Chordata
TRINITY_DN24728_c0_g1_i1	3976	356	KAE9534354.1	KAE9534354.1 hypothetical protein AGLY_008444 [Aphis glycines]	DUF4371 superfamily	1.87e-205	Aphis glycines	Arthropoda
TRINITY_DN24728_c0_g1_i1	3976	356	XP_013188693.1	XP_013188693.1 PREDICTED: zinc finger MYM-type protein 1-like [Amyelois transitella]	DUF4371 superfamily	6.03e-202	Amyelois transitella	Arthropoda
TRINITY_DN24728_c0_g1_i1	3976	356	XP_035433159.1	XP_035433159.1 zinc finger MYM-type protein 1-like [Spodoptera frugiperda]	DUF4371 superfamily	8.49e-202	Spodoptera frugiperda	Arthropoda
TRINITY_DN24728_c0_g1_i1	3976	356	XP_034051657.1	XP_034051657.1 zinc finger MYM-type protein 1-like [Gymnodraco acuticeps]	DUF4371 superfamily	2.19e-200	Gymnodraco acuticeps	Chordata
TRINITY_DN24728_c0_g1_i1	3976	356	KAF0749919.1	KAF0749919.1 zinc finger MYM-type protein 1-like, partial [Aphis craccivora]	DUF4371 superfamily	2.78e-200	Aphis craccivora	Arthropoda
TRINITY_DN24728_c0_g1_i1	3976	356	XP_037297251.1	XP_037297251.1 zinc finger MYM-type protein 1-like [Manduca sexta]	DUF4371 superfamily	3.47e-198	Manduca sexta	Arthropoda
TRINITY_DN24728_c0_g1_i1	3976	356	XP_022180192.1	XP_022180192.1 zinc finger MYM-type protein 1-like [Myzus persicae]	DUF4371 superfamily	5.15e-196	Myzus persicae	Arthropoda
TRINITY_DN24728_c0_g1_i1	3976	356	XP_015369428.1	XP_015369428.1 PREDICTED: zinc finger MYM-type protein 1-like [Diuraphis noxia]	DUF4371 superfamily	1.89e-192	Diuraphis noxia	Arthropoda
TRINITY_DN51829_c0_g1_i1	1585	342	XP_004437434.2	XP_004437434.2 PREDICTED: selenoprotein H [Ceratotherium simum simum]	Rdx superfamily	1.97e-22	Ceratotherium simum simum	Chordata
TRINITY_DN51829_c0_g1_i1	1585	342	XP_039197158.1	XP_039197158.1 selenoprotein H [Crotalus tigris]	Rdx superfamily	2.63e-22	Crotalus tigris	Chordata
TRINITY_DN51829_c0_g1_i1	1585	342	NP_001161859.1	NP_001161859.1 selenoprotein H [Equus caballus]	Rdx superfamily	9.63e-22	Equus caballus	Chordata
TRINITY_DN51829_c0_g1_i1	1585	342	XP_015680505.1	XP_015680505.1 selenoprotein H isoform X2 [Protobothrops mucrosquamatus]	Rdx superfamily	1.28e-21	Protobothrops mucrosquamatus	Chordata
TRINITY_DN51829_c0_g1_i1	1585	342	XP_013912409.1	XP_013912409.1 PREDICTED: selenoprotein H [Thamnophis sirtalis]	Rdx superfamily	1.28e-21	Thamnophis sirtalis	Chordata
TRINITY_DN51829_c0_g1_i1	1585	342	XP_008109147.2	XP_008109147.2 PREDICTED: selenoprotein H [Anolis carolinensis]	Rdx superfamily	1.47e-21	Anolis carolinensis	Chordata
TRINITY_DN51829_c0_g1_i1	1585	342	XP_041578957.1	XP_041578957.1 selenoprotein H [Vulpes lagopus]	Rdx superfamily	1.87e-21	Vulpes lagopus	Chordata
TRINITY_DN51829_c0_g1_i1	1585	342	XP_020018034.1	XP_020018034.1 selenoprotein H [Castor canadensis]	Rdx superfamily	1.87e-21	Castor canadensis	Chordata
TRINITY_DN51829_c0_g1_i1	1585	342	XP_025308067.2	XP_025308067.2 selenoprotein H [Canis lupus dingo]	Rdx superfamily	1.87e-21	Canis lupus dingo	Chordata
TRINITY_DN51829_c0_g1_i1	1585	342	XP_026342808.1	XP_026342808.1 selenoprotein H [Ursus arctos horribilis]	Rdx superfamily	1.87e-21	Ursus arctos horribilis	Chordata
TRINITY_DN51829_c0_g1_i1	1585	342	XP_014683298.1	XP_014683298.1 PREDICTED: selenoprotein H [Equus asinus]	Rdx superfamily	2.49e-21	Equus asinus	Chordata
TRINITY_DN51829_c0_g1_i1	1585	342	NP_001157978.1	NP_001157978.1 selenoprotein H [Canis lupus familiaris]	Rdx superfamily	2.56e-21	Canis lupus familiaris	Chordata
TRINITY_DN51829_c0_g1_i1	1585	342	XP_037019214.1	XP_037019214.1 selenoprotein H [Artibeus jamaicensis]	Rdx superfamily	2.64e-21	Artibeus jamaicensis	Chordata
TRINITY_DN51829_c0_g1_i1	1585	342	XP_015680504.1	XP_015680504.1 selenoprotein H isoform X1 [Protobothrops mucrosquamatus]	Rdx superfamily	2.78e-21	Protobothrops mucrosquamatus	Chordata
TRINITY_DN51829_c0_g1_i1	1585	342	XP_008529309.1	XP_008529309.1 PREDICTED: LOW QUALITY PROTEIN: selenoprotein H [Equus przewalskii]	Rdx superfamily	3.42e-21	Equus przewalskii	Chordata
TRINITY_DN51829_c0_g1_i1	1585	342	XP_017524278.1	XP_017524278.1 selenoprotein H [Manis javanica]	Rdx superfamily	3.42e-21	Manis javanica	Chordata
TRINITY_DN51829_c0_g1_i1	1585	342	XP_008692490.2	XP_008692490.2 selenoprotein H [Ursus maritimus]	Rdx superfamily	3.51e-21	Ursus maritimus	Chordata
TRINITY_DN51829_c0_g1_i1	1585	342	XP_011227547.3	XP_011227547.3 selenoprotein H [Ailuropoda melanoleuca]	Rdx superfamily	3.51e-21	Ailuropoda melanoleuca	Chordata
TRINITY_DN51829_c0_g1_i1	1585	342	XP_004622858.2	XP_004622858.2 PREDICTED: selenoprotein H [Sorex araneus]	Rdx superfamily	3.62e-21	Sorex araneus	Chordata
TRINITY_DN51829_c0_g1_i1	1585	342	XP_020647913.1	XP_020647913.1 selenoprotein H isoform X1 [Pogona vitticeps]	Rdx superfamily	4.21e-21	Pogona vitticeps	Chordata
TRINITY_DN29181_c0_g2_i1	2608	340	XP_030046369.1	XP_030046369.1 E3 SUMO-protein ligase KIAA1586-like [Microcaecilia unicolor]	Dimer_Tnp_hAT superfamily	5.09e-238	Microcaecilia unicolor	Chordata
TRINITY_DN29181_c0_g2_i1	2608	340	XP_033011354.1	XP_033011354.1 peroxisome biogenesis factor 2 isoform X1 [Lacerta agilis]	Dimer_Tnp_hAT superfamily	2.08e-217	Lacerta agilis	Chordata
TRINITY_DN29181_c0_g2_i1	2608	340	XP_034981522.1	XP_034981522.1 peroxisome biogenesis factor 2 isoform X1 [Zootoca vivipara]	Dimer_Tnp_hAT superfamily	6.9e-216	Zootoca vivipara	Chordata
TRINITY_DN29181_c0_g2_i1	2608	340	XP_015277122.1	XP_015277122.1 PREDICTED: uncharacterized protein KIAA1586-like [Gekko japonicus]	Dimer_Tnp_hAT superfamily	5.07e-212	Gekko japonicus	Chordata
TRINITY_DN29181_c0_g2_i1	2608	340	XP_015284597.1	XP_015284597.1 PREDICTED: uncharacterized protein KIAA1586-like [Gekko japonicus]	Dimer_Tnp_hAT superfamily	7.19e-206	Gekko japonicus	Chordata
TRINITY_DN29181_c0_g2_i1	2608	340	KAF5281765.1	KAF5281765.1 hypothetical protein FQR65_LT14560 [Abscondita terminalis]	Dimer_Tnp_hAT superfamily	4.94e-186	Abscondita terminalis	Arthropoda
TRINITY_DN29181_c0_g2_i1	2608	340	XP_040195664.1	XP_040195664.1 E3 SUMO-protein ligase KIAA1586-like [Rana temporaria]	Dimer_Tnp_hAT superfamily	3.1e-179	Rana temporaria	Chordata
TRINITY_DN29181_c0_g2_i1	2608	340	XP_040275875.1	XP_040275875.1 E3 SUMO-protein ligase KIAA1586-like [Bufo bufo]	Dimer_Tnp_hAT superfamily	1.74e-178	Bufo bufo	Chordata
TRINITY_DN29181_c0_g2_i1	2608	340	XP_040271681.1	XP_040271681.1 E3 SUMO-protein ligase KIAA1586-like [Bufo bufo]	Dimer_Tnp_hAT superfamily	1.74e-178	Bufo bufo	Chordata
TRINITY_DN29181_c0_g2_i1	2608	340	XP_040264711.1	XP_040264711.1 E3 SUMO-protein ligase KIAA1586-like [Bufo bufo]	Dimer_Tnp_hAT superfamily	1.74e-178	Bufo bufo	Chordata
TRINITY_DN29181_c0_g2_i1	2608	340	XP_040275695.1	XP_040275695.1 E3 SUMO-protein ligase KIAA1586-like [Bufo bufo]	Dimer_Tnp_hAT superfamily	2.45e-178	Bufo bufo	Chordata
TRINITY_DN29181_c0_g2_i1	2608	340	XP_040286010.1	XP_040286010.1 E3 SUMO-protein ligase KIAA1586-like [Bufo bufo]	Dimer_Tnp_hAT superfamily	2.45e-178	Bufo bufo	Chordata
TRINITY_DN29181_c0_g2_i1	2608	340	XP_040064332.2	XP_040064332.2 E3 SUMO-protein ligase KIAA1586-like [Ixodes scapularis]	Dimer_Tnp_hAT superfamily	3.15e-176	Ixodes scapularis	Arthropoda
TRINITY_DN29181_c0_g2_i1	2608	340	XP_040069819.1	XP_040069819.1 E3 SUMO-protein ligase KIAA1586-like [Ixodes scapularis]	Dimer_Tnp_hAT superfamily	3.15e-176	Ixodes scapularis	Arthropoda
TRINITY_DN29181_c0_g2_i1	2608	340	XP_029837391.2	XP_029837391.2 E3 SUMO-protein ligase KIAA1586-like [Ixodes scapularis]	Dimer_Tnp_hAT superfamily	6.27e-176	Ixodes scapularis	Arthropoda
TRINITY_DN29181_c0_g2_i1	2608	340	RXN14539.1	RXN14539.1 E3 SUMO-protein ligase KIAA1586-like [Labeo rohita]	Dimer_Tnp_hAT superfamily	5.97e-175	Labeo rohita	Chordata
TRINITY_DN29181_c0_g2_i1	2608	340	XP_040065338.1	XP_040065338.1 E3 SUMO-protein ligase KIAA1586-like [Ixodes scapularis]	Dimer_Tnp_hAT superfamily	7.46e-174	Ixodes scapularis	Arthropoda
TRINITY_DN29181_c0_g2_i1	2608	340	RXN13095.1	RXN13095.1 E3 SUMO-protein ligase KIAA1586-like [Labeo rohita]	Dimer_Tnp_hAT superfamily	9.84e-174	Labeo rohita	Chordata
TRINITY_DN29181_c0_g2_i1	2608	340	XP_040185820.1	XP_040185820.1 E3 SUMO-protein ligase KIAA1586-like [Rana temporaria]	Dimer_Tnp_hAT superfamily	2.68e-173	Rana temporaria	Chordata
TRINITY_DN29181_c0_g2_i1	2608	340	XP_039896687.1	XP_039896687.1 E3 SUMO-protein ligase KIAA1586-like [Simochromis diagramma]	Dimer_Tnp_hAT superfamily	1.18e-169	Simochromis diagramma	Chordata
TRINITY_DN83709_c0_g1_i1	1850	336	NXV65996.1	NXV65996.1 ODB2 dehydrogenase [Molothrus ater]	PLN02528 superfamily	6.2e-138	Molothrus ater	Chordata
TRINITY_DN83709_c0_g1_i1	1850	336	NXL16815.1	NXL16815.1 ODB2 dehydrogenase [Setophaga kirtlandii]	PLN02528 superfamily	6.2e-138	Setophaga kirtlandii	Chordata
TRINITY_DN83709_c0_g1_i1	1850	336	NWZ10961.1	NWZ10961.1 ODB2 dehydrogenase [Agelaius phoeniceus]	PLN02528 superfamily	6.2e-138	Agelaius phoeniceus	Chordata
TRINITY_DN83709_c0_g1_i1	1850	336	NWR13374.1	NWR13374.1 ODB2 dehydrogenase [Emberiza fucata]	PLN02528 superfamily	6.2e-138	Emberiza fucata	Chordata
TRINITY_DN83709_c0_g1_i1	1850	336	NXE59765.1	NXE59765.1 ODB2 dehydrogenase [Calcarius ornatus]	PLN02528 superfamily	8.77e-138	Calcarius ornatus	Chordata
TRINITY_DN83709_c0_g1_i1	1850	336	XP_036243521.1	XP_036243521.1 lipoamide acyltransferase component of branched-chain alpha-keto acid dehydrogenase complex, mitochondrial isoform X3 [Molothrus ater]	PLN02528 superfamily	1.08e-137	Molothrus ater	Chordata
TRINITY_DN83709_c0_g1_i1	1850	336	XP_036243520.1	XP_036243520.1 lipoamide acyltransferase component of branched-chain alpha-keto acid dehydrogenase complex, mitochondrial isoform X2 [Molothrus ater]	PLN02528 superfamily	1.23e-137	Molothrus ater	Chordata
TRINITY_DN83709_c0_g1_i1	1850	336	NXQ71165.1	NXQ71165.1 ODB2 dehydrogenase [Quiscalus mexicanus]	PLN02528 superfamily	1.24e-137	Quiscalus mexicanus	Chordata
TRINITY_DN83709_c0_g1_i1	1850	336	NWT29271.1	NWT29271.1 ODB2 dehydrogenase [Cardinalis cardinalis]	PLN02528 superfamily	1.75e-137	Cardinalis cardinalis	Chordata
TRINITY_DN83709_c0_g1_i1	1850	336	NWZ99595.1	NWZ99595.1 ODB2 dehydrogenase [Nesospiza acunhae]	PLN02528 superfamily	1.75e-137	Nesospiza acunhae	Chordata
TRINITY_DN83709_c0_g1_i1	1850	336	KAF4805662.1	KAF4805662.1 Lipoamide acyltransferase component of branched-chain alpha-keto acid dehydrogenase complex, mitochondrial [Turdus rufiventris]	PLN02528 superfamily	2.6e-137	Turdus rufiventris	Chordata
TRINITY_DN83709_c0_g1_i1	1850	336	NXP88996.1	NXP88996.1 ODB2 dehydrogenase [Passerina amoena]	PLN02528 superfamily	3.5e-137	Passerina amoena	Chordata
TRINITY_DN83709_c0_g1_i1	1850	336	NWQ45168.1	NWQ45168.1 ODB2 dehydrogenase [Melospiza melodia]	PLN02528 superfamily	3.5e-137	Melospiza melodia	Chordata
TRINITY_DN83709_c0_g1_i1	1850	336	XP_041339281.1	XP_041339281.1 lipoamide acyltransferase component of branched-chain alpha-keto acid dehydrogenase complex, mitochondrial isoform X1 [Pyrgilauda ruficollis]	PLN02528 superfamily	4.32e-137	Pyrgilauda ruficollis	Chordata
TRINITY_DN83709_c0_g1_i1	1850	336	RLW05897.1	RLW05897.1 hypothetical protein DV515_00004967 [Chloebia gouldiae]	PLN02528 superfamily	4.32e-137	Chloebia gouldiae	Chordata
TRINITY_DN83709_c0_g1_i1	1850	336	XP_005482097.1	XP_005482097.1 lipoamide acyltransferase component of branched-chain alpha-keto acid dehydrogenase complex, mitochondrial [Zonotrichia albicollis]	PLN02528 superfamily	4.32e-137	Zonotrichia albicollis	Chordata
TRINITY_DN83709_c0_g1_i1	1850	336	XP_039573889.1	XP_039573889.1 lipoamide acyltransferase component of branched-chain alpha-keto acid dehydrogenase complex, mitochondrial isoform X1 [Passer montanus]	PLN02528 superfamily	6.11e-137	Passer montanus	Chordata
TRINITY_DN83709_c0_g1_i1	1850	336	XP_009086748.1	XP_009086748.1 lipoamide acyltransferase component of branched-chain alpha-keto acid dehydrogenase complex, mitochondrial isoform X2 [Serinus canaria]	PLN02528 superfamily	6.11e-137	Serinus canaria	Chordata
TRINITY_DN83709_c0_g1_i1	1850	336	KAF2984517.1	KAF2984517.1 hypothetical protein EK904_003463 [Melospiza melodia maxima]	PLN02528 superfamily	6.11e-137	Melospiza melodia maxima	Chordata
TRINITY_DN83709_c0_g1_i1	1850	336	XP_018767676.1	XP_018767676.1 lipoamide acyltransferase component of branched-chain alpha-keto acid dehydrogenase complex, mitochondrial isoform X1 [Serinus canaria]	PLN02528 superfamily	6.96e-137	Serinus canaria	Chordata
TRINITY_DN1196_c1_g2_i1	756	328	EAT41960.1	EAT41960.1 AAEL006456-PA [Aedes aegypti]	CLECT	3.13e-15	Aedes aegypti	Arthropoda
TRINITY_DN1196_c1_g2_i1	756	328	XP_039376232.1	XP_039376232.1 C-type lectin lectoxin-Thr1-like isoform X2 [Mauremys reevesii]	CLECT	5.49e-15	Mauremys reevesii	Chordata
TRINITY_DN1196_c1_g2_i1	756	328	XP_033027050.1	XP_033027050.1 C-type lectin-like [Lacerta agilis]	CLECT	7.24e-15	Lacerta agilis	Chordata
TRINITY_DN1196_c1_g2_i1	756	328	XP_039376231.1	XP_039376231.1 C-type lectin lectoxin-Thr1-like isoform X1 [Mauremys reevesii]	CLECT	7.93e-15	Mauremys reevesii	Chordata
TRINITY_DN1196_c1_g2_i1	756	328	XP_030395797.1	XP_030395797.1 lithostathine-1-like isoform X2 [Gopherus evgoodei]	CLECT	1.07e-14	Gopherus evgoodei	Chordata
TRINITY_DN1196_c1_g2_i1	756	328	XP_021694348.1	XP_021694348.1 hepatic lectin-like [Aedes aegypti]	CLECT	1.45e-14	Aedes aegypti	Arthropoda
TRINITY_DN1196_c1_g2_i1	756	328	XP_034993078.1	XP_034993078.1 C-type lectin-like isoform X2 [Zootoca vivipara]	CLECT	3.43e-14	Zootoca vivipara	Chordata
TRINITY_DN1196_c1_g2_i1	756	328	XP_028559384.1	XP_028559384.1 C-type lectin-like [Podarcis muralis]	CLECT	5.34e-14	Podarcis muralis	Chordata
TRINITY_DN1196_c1_g2_i1	756	328	XP_005314786.1	XP_005314786.1 lithostathine-1-like [Chrysemys picta bellii]	CLECT	6.05e-14	Chrysemys picta bellii	Chordata
TRINITY_DN1196_c1_g2_i1	756	328	KAF7686719.1	KAF7686719.1 hypothetical protein HF521_015112 [Silurus meridionalis]	CLECT	7.23e-14	Silurus meridionalis	Chordata
TRINITY_DN1196_c1_g2_i1	756	328	XP_033026363.1	XP_033026363.1 C-type lectin BpLec-like [Lacerta agilis]	CLECT	7.28e-14	Lacerta agilis	Chordata
TRINITY_DN1196_c1_g2_i1	756	328	XP_034993076.1	XP_034993076.1 C-type lectin-like isoform X1 [Zootoca vivipara]	CLECT	7.45e-14	Zootoca vivipara	Chordata
TRINITY_DN1196_c1_g2_i1	756	328	XP_035695739.1	XP_035695739.1 collectin-10-like [Branchiostoma floridae]	CLECT	1.1e-13	Branchiostoma floridae	Chordata
TRINITY_DN1196_c1_g2_i1	756	328	XP_028316688.1	XP_028316688.1 CD209 antigen-like protein D [Gouania willdenowi]	CLECT	1.18e-13	Gouania willdenowi	Chordata
TRINITY_DN1196_c1_g2_i1	756	328	ADK39269.1	ADK39269.1 lectoxin-Oapo1, partial [Pseudopus apodus]	CLECT	1.26e-13	Pseudopus apodus	Chordata
TRINITY_DN1196_c1_g2_i1	756	328	XP_034267486.1	XP_034267486.1 C-type lectin Cal-like [Pantherophis guttatus]	CLECT	2.81e-13	Pantherophis guttatus	Chordata
TRINITY_DN1196_c1_g2_i1	756	328	XP_025028431.1	XP_025028431.1 C-type lectin BpLec-like [Python bivittatus]	CLECT	3.91e-13	Python bivittatus	Chordata
TRINITY_DN1196_c1_g2_i1	756	328	XP_034267482.1	XP_034267482.1 C-type lectin Cal-like [Pantherophis guttatus]	CLECT	5.45e-13	Pantherophis guttatus	Chordata
TRINITY_DN1196_c1_g2_i1	756	328	XP_029902296.1	XP_029902296.1 CD209 antigen-like protein C [Myripristis murdjan]	CLECT	6.49e-13	Myripristis murdjan	Chordata
TRINITY_DN1196_c1_g2_i1	756	328	XP_027893479.1	XP_027893479.1 ladderlectin-like isoform X1 [Xiphophorus couchianus]	CLECT	7.25e-13	Xiphophorus couchianus	Chordata
TRINITY_DN5487_c5_g1_i1	1975	320	KAG8310565.1	KAG8310565.1 protein propionyltransferase activity protein [Homalodisca vitripennis]	zf-TAZ	6.32e-15	Homalodisca vitripennis	Arthropoda
TRINITY_DN5487_c5_g1_i1	1975	320	KAF6360201.1	KAF6360201.1 hypothetical protein mMyoMyo1_011153 [Myotis myotis]	zf-TAZ	2.08e-08	Myotis myotis	Chordata
TRINITY_DN5487_c5_g1_i1	1975	320	XP_023700181.1	XP_023700181.1 CREB-binding protein-like [Paramormyrops kingsleyae]	zf-TAZ	2.35e-08	Paramormyrops kingsleyae	Chordata
TRINITY_DN5487_c5_g1_i1	1975	320	2KA6_A	2KA6_A NMR structure of the CBP-TAZ2/STAT1-TAD complex [Mus musculus]	zf-TAZ	1.01e-07	Homo sapiens;Mus musculus	Chordata
TRINITY_DN5487_c5_g1_i1	1975	320	1F81_A	1F81_A SOLUTION STRUCTURE OF THE TAZ2 DOMAIN OF THE TRANSCRIPTIONAL ADAPTOR PROTEIN CBP [Mus musculus]	zf-TAZ	1.25e-07	Mus musculus	Chordata
TRINITY_DN5487_c5_g1_i1	1975	320	3P57_P	3P57_P Crystal structure of the p300 TAZ2 domain bound to MEF2 on DNA [Homo sapiens]	zf-TAZ	1.71e-07	Homo sapiens	Chordata
TRINITY_DN5487_c5_g1_i1	1975	320	XP_014477247.1	XP_014477247.1 PREDICTED: CREB-binding protein isoform X2 [Dinoponera quadriceps]	zf-TAZ	1.95e-07	Dinoponera quadriceps	Arthropoda
TRINITY_DN5487_c5_g1_i1	1975	320	XP_014477246.1	XP_014477246.1 PREDICTED: CREB-binding protein isoform X1 [Dinoponera quadriceps]	zf-TAZ	1.95e-07	Dinoponera quadriceps	Arthropoda
TRINITY_DN5487_c5_g1_i1	1975	320	CAF4949613.1	CAF4949613.1 unnamed protein product [Pieris macdunnoughi]	zf-TAZ	1.97e-07	Pieris macdunnoughi	Arthropoda
TRINITY_DN5487_c5_g1_i1	1975	320	CAF4949621.1	CAF4949621.1 unnamed protein product [Pieris macdunnoughi]	zf-TAZ	1.97e-07	Pieris macdunnoughi	Arthropoda
TRINITY_DN5487_c5_g1_i1	1975	320	XP_022126995.1	XP_022126995.1 LOW QUALITY PROTEIN: CREB-binding protein [Pieris rapae]	zf-TAZ	1.98e-07	Pieris rapae	Arthropoda
TRINITY_DN5487_c5_g1_i1	1975	320	5HP0_A	5HP0_A Solution Structure of TAZ2-p53AD2 [Mus musculus]	zf-TAZ	2.2e-07	Mus musculus	Chordata
TRINITY_DN5487_c5_g1_i1	1975	320	CAF1294765.1	CAF1294765.1 unnamed protein product [Adineta ricciae]	zf-TAZ	4.05e-07	Adineta ricciae	Rotifera
TRINITY_DN5487_c5_g1_i1	1975	320	XP_036152019.1	XP_036152019.1 histone lysine acetyltransferase CREBBP-like [Myotis myotis]	zf-TAZ	4.48e-07	Myotis myotis	Chordata
TRINITY_DN5487_c5_g1_i1	1975	320	XP_027200166.1	XP_027200166.1 CREB-binding protein-like [Dermatophagoides pteronyssinus]	zf-TAZ	4.49e-07	Dermatophagoides pteronyssinus	Arthropoda
TRINITY_DN5487_c5_g1_i1	1975	320	XP_036421030.1	XP_036421030.1 histone lysine acetyltransferase CREBBP-like [Colossoma macropomum]	zf-TAZ	4.53e-07	Colossoma macropomum	Chordata
TRINITY_DN5487_c5_g1_i1	1975	320	5HPD_A	5HPD_A Solution Structure of TAZ2-p53TAD [Mus musculus]	zf-TAZ	5.04e-07	Mus musculus	Chordata
TRINITY_DN5487_c5_g1_i1	1975	320	CAD7473285.1	CAD7473285.1 unnamed protein product [Plutella xylostella]	zf-TAZ	7.72e-07	Plutella xylostella	Arthropoda
TRINITY_DN5487_c5_g1_i1	1975	320	XP_037967772.1	XP_037967772.1 histone lysine acetyltransferase CREBBP isoform X15 [Plutella xylostella]	zf-TAZ	7.73e-07	Plutella xylostella	Arthropoda
TRINITY_DN5487_c5_g1_i1	1975	320	XP_037967771.1	XP_037967771.1 histone lysine acetyltransferase CREBBP isoform X14 [Plutella xylostella]	zf-TAZ	7.74e-07	Plutella xylostella	Arthropoda
TRINITY_DN6482_c0_g1_i3	1163	318	KAG8310773.1	KAG8310773.1 Non-structural maintenance of chromosomes element 4 A [Homalodisca vitripennis]	Nse4_C	1.63e-86	Homalodisca vitripennis	Arthropoda
TRINITY_DN6482_c0_g1_i3	1163	318	XP_040293965.1	XP_040293965.1 non-structural maintenance of chromosomes element 4 homolog A isoform X1 [Bufo bufo]	Nse4_C	5.74e-27	Bufo bufo	Chordata
TRINITY_DN6482_c0_g1_i3	1163	318	CAF5171187.1	CAF5171187.1 unnamed protein product [Ranitomeya imitator]	Nse4_C	2.81e-26	Ranitomeya imitator	Chordata
TRINITY_DN6482_c0_g1_i3	1163	318	KAG8551484.1	KAG8551484.1 hypothetical protein GDO81_004136 [Engystomops pustulosus]	Nse4_C	3.76e-25	Engystomops pustulosus	Chordata
TRINITY_DN6482_c0_g1_i3	1163	318	XP_033885976.1	XP_033885976.1 non-structural maintenance of chromosomes element 4 homolog A [Acipenser ruthenus]	Nse4_C	3.95e-25	Acipenser ruthenus	Chordata
TRINITY_DN6482_c0_g1_i3	1163	318	XP_023727941.1	XP_023727941.1 non-structural maintenance of chromosomes element 4 homolog A [Cryptotermes secundus]	Nse4_C	1.44e-24	Cryptotermes secundus	Arthropoda
TRINITY_DN6482_c0_g1_i3	1163	318	KAG6937482.1	KAG6937482.1 arginyltransferase 1, partial [Chelydra serpentina]	Nse4_C	2.11e-24	Chelydra serpentina	Chordata
TRINITY_DN6482_c0_g1_i3	1163	318	KAG8435631.1	KAG8435631.1 hypothetical protein GDO86_013536 [Hymenochirus boettgeri]	Nse4_C	5.54e-24	Hymenochirus boettgeri	Chordata
TRINITY_DN6482_c0_g1_i3	1163	318	XP_041124351.1	XP_041124351.1 non-structural maintenance of chromosomes element 4 homolog A [Polyodon spathula]	Nse4_C	9.81e-24	Polyodon spathula	Chordata
TRINITY_DN6482_c0_g1_i3	1163	318	XP_032550973.1	XP_032550973.1 non-structural maintenance of chromosomes element 4 homolog A [Chiroxiphia lanceolata]	Nse4_C	1.31e-23	Chiroxiphia lanceolata	Chordata
TRINITY_DN6482_c0_g1_i3	1163	318	XP_009908715.1	XP_009908715.1 PREDICTED: non-structural maintenance of chromosomes element 4 homolog A [Dryobates pubescens]	Nse4_C	1.33e-23	Dryobates pubescens	Chordata
TRINITY_DN6482_c0_g1_i3	1163	318	XP_019358480.1	XP_019358480.1 PREDICTED: non-structural maintenance of chromosomes element 4 homolog A [Gavialis gangeticus]	Nse4_C	1.34e-23	Gavialis gangeticus	Chordata
TRINITY_DN6482_c0_g1_i3	1163	318	XP_037760757.1	XP_037760757.1 non-structural maintenance of chromosomes element 4 homolog A isoform X1 [Chelonia mydas]	Nse4_C	1.39e-23	Chelonia mydas	Chordata
TRINITY_DN6482_c0_g1_i3	1163	318	XP_038266850.1	XP_038266850.1 non-structural maintenance of chromosomes element 4 homolog A [Dermochelys coriacea]	Nse4_C	1.39e-23	Dermochelys coriacea	Chordata
TRINITY_DN6482_c0_g1_i3	1163	318	KAG8435632.1	KAG8435632.1 hypothetical protein GDO86_013536 [Hymenochirus boettgeri]	Nse4_C	1.45e-23	Hymenochirus boettgeri	Chordata
TRINITY_DN6482_c0_g1_i3	1163	318	XP_011301950.1	XP_011301950.1 PREDICTED: EP300-interacting inhibitor of differentiation 3 isoform X2 [Fopius arisanus]	Nse4_C	2.05e-23	Fopius arisanus	Arthropoda
TRINITY_DN6482_c0_g1_i3	1163	318	XP_027600076.1	XP_027600076.1 non-structural maintenance of chromosomes element 4 homolog A [Pipra filicauda]	Nse4_C	2.48e-23	Pipra filicauda	Chordata
TRINITY_DN6482_c0_g1_i3	1163	318	XP_032632601.1	XP_032632601.1 non-structural maintenance of chromosomes element 4 homolog A [Chelonoidis abingdonii]	Nse4_C	2.55e-23	Chelonoidis abingdonii	Chordata
TRINITY_DN6482_c0_g1_i3	1163	318	XP_030427104.1	XP_030427104.1 non-structural maintenance of chromosomes element 4 homolog A [Gopherus evgoodei]	Nse4_C	2.55e-23	Gopherus evgoodei	Chordata
TRINITY_DN6482_c0_g1_i3	1163	318	TFK09845.1	TFK09845.1 Non-structural maintenance of chromosomes element 4-like protein A [Platysternon megacephalum]	Nse4_C	3.1e-23	Platysternon megacephalum	Chordata
TRINITY_DN7691_c0_g1_i1	1305	300	XP_024137839.1	XP_024137839.1 snurportin-1 [Oryzias melastigma]	Snurportin-1_C	3.55e-55	Oryzias melastigma	Chordata
TRINITY_DN7691_c0_g1_i1	1305	300	XP_026670976.1	XP_026670976.1 snurportin-1 [Ceratina calcarata]	Snurportin-1_C	3.96e-55	Ceratina calcarata	Arthropoda
TRINITY_DN7691_c0_g1_i1	1305	300	GCC38583.1	GCC38583.1 hypothetical protein [Chiloscyllium punctatum]	Snurportin-1_C	5.04e-55	Chiloscyllium punctatum	Chordata
TRINITY_DN7691_c0_g1_i1	1305	300	KAF6719242.1	KAF6719242.1 Snurportin-1 [Oryzias melastigma]	Snurportin-1_C	6.99e-55	Oryzias melastigma	Chordata
TRINITY_DN7691_c0_g1_i1	1305	300	XP_011230482.1	XP_011230482.1 snurportin-1 [Ailuropoda melanoleuca]	Snurportin-1_C	7.16e-55	Ailuropoda melanoleuca	Chordata
TRINITY_DN7691_c0_g1_i1	1305	300	XP_038640451.1	XP_038640451.1 snurportin-1 isoform X4 [Scyliorhinus canicula]	Snurportin-1_C	7.75e-55	Scyliorhinus canicula	Chordata
TRINITY_DN7691_c0_g1_i1	1305	300	XP_008706678.1	XP_008706678.1 snurportin-1 isoform X1 [Ursus maritimus]	Snurportin-1_C	1.01e-54	Ursus maritimus;Ursus arctos horribilis	Chordata
TRINITY_DN7691_c0_g1_i1	1305	300	XP_041034096.1	XP_041034096.1 snurportin-1 [Carcharodon carcharias]	Snurportin-1_C	1.09e-54	Carcharodon carcharias	Chordata
TRINITY_DN7691_c0_g1_i1	1305	300	XP_004407833.1	XP_004407833.1 PREDICTED: snurportin-1 isoform X2 [Odobenus rosmarus divergens]	Snurportin-1_C	3.34e-54	Odobenus rosmarus divergens	Chordata
TRINITY_DN7691_c0_g1_i1	1305	300	XP_006744498.1	XP_006744498.1 snurportin-1 isoform X1 [Leptonychotes weddellii]	Snurportin-1_C	3.34e-54	Leptonychotes weddellii	Chordata
TRINITY_DN7691_c0_g1_i1	1305	300	XP_017193478.1	XP_017193478.1 PREDICTED: snurportin-1 [Oryctolagus cuniculus]	Snurportin-1_C	3.6e-54	Oryctolagus cuniculus	Chordata
TRINITY_DN7691_c0_g1_i1	1305	300	XP_012420476.1	XP_012420476.1 PREDICTED: snurportin-1 isoform X1 [Odobenus rosmarus divergens]	Snurportin-1_C	4.11e-54	Odobenus rosmarus divergens	Chordata
TRINITY_DN7691_c0_g1_i1	1305	300	XP_008520486.1	XP_008520486.1 PREDICTED: snurportin-1 isoform X1 [Equus przewalskii]	Snurportin-1_C	4.69e-54	Equus przewalskii	Chordata
TRINITY_DN7691_c0_g1_i1	1305	300	RVE71544.1	RVE71544.1 hypothetical protein OJAV_G00052710 [Oryzias javanicus]	Snurportin-1_C	4.78e-54	Oryzias javanicus	Chordata
TRINITY_DN7691_c0_g1_i1	1305	300	XP_007525818.1	XP_007525818.1 PREDICTED: snurportin-1 [Erinaceus europaeus]	Snurportin-1_C	5.48e-54	Erinaceus europaeus	Chordata
TRINITY_DN7691_c0_g1_i1	1305	300	XP_013201621.1	XP_013201621.1 snurportin-1 [Microtus ochrogaster]	Snurportin-1_C	6.92e-54	Microtus ochrogaster	Chordata
TRINITY_DN7691_c0_g1_i1	1305	300	XP_023491494.1	XP_023491494.1 snurportin-1 isoform X1 [Equus caballus]	Snurportin-1_C	7.07e-54	Equus caballus	Chordata
TRINITY_DN7691_c0_g1_i1	1305	300	XP_014696898.1	XP_014696898.1 PREDICTED: snurportin-1 isoform X1 [Equus asinus]	Snurportin-1_C	7.07e-54	Equus asinus	Chordata
TRINITY_DN7691_c0_g1_i1	1305	300	XP_042524763.1	XP_042524763.1 snurportin-1 isoform X1 [Dipodomys spectabilis]	Snurportin-1_C	7.72e-54	Dipodomys spectabilis	Chordata
TRINITY_DN7691_c0_g1_i1	1305	300	XP_021489244.1	XP_021489244.1 snurportin-1 [Meriones unguiculatus]	Snurportin-1_C	8.5e-54	Meriones unguiculatus	Chordata
TRINITY_DN89009_c0_g1_i1	1706	298	XP_014190650.2	XP_014190650.2 uncharacterized protein K02A2.6 [Haplochromis burtoni]	RNase_HI_RT_Ty3	5.31e-147	Haplochromis burtoni	Chordata
TRINITY_DN89009_c0_g1_i1	1706	298	XP_033120244.1	XP_033120244.1 uncharacterized protein K02A2.6-like [Anneissia japonica]	RNase_HI_RT_Ty3	7.68e-146	Anneissia japonica	Echinodermata
TRINITY_DN89009_c0_g1_i1	1706	298	XP_039525150.1	XP_039525150.1 uncharacterized protein K02A2.6-like [Pimephales promelas]	RNase_HI_RT_Ty3	2.58e-145	Pimephales promelas	Chordata
TRINITY_DN89009_c0_g1_i1	1706	298	XP_026046823.1	XP_026046823.1 uncharacterized protein K02A2.6-like [Astatotilapia calliptera]	RNase_HI_RT_Ty3	2.03e-144	Astatotilapia calliptera	Chordata
TRINITY_DN89009_c0_g1_i1	1706	298	XP_039505380.1	XP_039505380.1 uncharacterized protein K02A2.6-like [Pimephales promelas]	RNase_HI_RT_Ty3	1.52e-142	Pimephales promelas	Chordata
TRINITY_DN89009_c0_g1_i1	1706	298	KAG1937898.1	KAG1937898.1 retrotransposable element [Pimephales promelas]	RNase_HI_RT_Ty3	2.16e-142	Pimephales promelas	Chordata
TRINITY_DN89009_c0_g1_i1	1706	298	XP_033126304.1	XP_033126304.1 uncharacterized protein K02A2.6-like [Anneissia japonica]	RNase_HI_RT_Ty3	3.19e-142	Anneissia japonica	Echinodermata
TRINITY_DN89009_c0_g1_i1	1706	298	XP_026065322.1	XP_026065322.1 uncharacterized protein K02A2.6-like [Carassius auratus]	RNase_HI_RT_Ty3	1.22e-141	Carassius auratus	Chordata
TRINITY_DN89009_c0_g1_i1	1706	298	XP_026042813.1	XP_026042813.1 uncharacterized protein K02A2.6-like [Astatotilapia calliptera]	RNase_HI_RT_Ty3	1.58e-141	Astatotilapia calliptera	Chordata
TRINITY_DN89009_c0_g1_i1	1706	298	XP_036837649.1	XP_036837649.1 uncharacterized protein K02A2.6-like [Oncorhynchus mykiss]	RNase_HI_RT_Ty3	2.47e-141	Oncorhynchus mykiss	Chordata
TRINITY_DN89009_c0_g1_i1	1706	298	XP_041371536.1	XP_041371536.1 uncharacterized protein K02A2.6-like [Gigantopelta aegis]	RNase_HI_RT_Ty3	3.36e-141	Gigantopelta aegis	Mollusca
TRINITY_DN89009_c0_g1_i1	1706	298	XP_015810099.1	XP_015810099.1 PREDICTED: uncharacterized protein K02A2.6-like, partial [Nothobranchius furzeri]	RNase_HI_RT_Ty3	2.26e-140	Nothobranchius furzeri	Chordata
TRINITY_DN89009_c0_g1_i1	1706	298	XP_041958582.1	XP_041958582.1 uncharacterized protein K02A2.6-like [Alosa sapidissima]	RNase_HI_RT_Ty3	2.84e-140	Alosa sapidissima	Chordata
TRINITY_DN89009_c0_g1_i1	1706	298	XP_030286082.1	XP_030286082.1 uncharacterized protein K02A2.6-like [Sparus aurata]	RNase_HI_RT_Ty3	4.14e-140	Sparus aurata	Chordata
TRINITY_DN89009_c0_g1_i1	1706	298	XP_036837647.1	XP_036837647.1 uncharacterized protein K02A2.6-like [Oncorhynchus mykiss]	RNase_HI_RT_Ty3	5.49e-140	Oncorhynchus mykiss	Chordata
TRINITY_DN89009_c0_g1_i1	1706	298	XP_032227710.1	XP_032227710.1 uncharacterized protein K02A2.6-like isoform X1 [Nematostella vectensis]	RNase_HI_RT_Ty3	3.22e-139	Nematostella vectensis	Cnidaria
TRINITY_DN89009_c0_g1_i1	1706	298	XP_031428578.2	XP_031428578.2 uncharacterized protein K02A2.6-like [Clupea harengus]	RNase_HI_RT_Ty3	1.23e-138	Clupea harengus	Chordata
TRINITY_DN89009_c0_g1_i1	1706	298	XP_029192973.1	XP_029192973.1 uncharacterized protein K02A2.6-like [Acropora millepora]	RNase_HI_RT_Ty3	5.63e-138	Acropora millepora	Cnidaria
TRINITY_DN89009_c0_g1_i1	1706	298	XP_023930407.1	XP_023930407.1 uncharacterized protein K02A2.6-like [Lingula anatina]	RNase_HI_RT_Ty3	1.07e-137	Lingula anatina	Brachiopoda
TRINITY_DN89009_c0_g1_i1	1706	298	XP_013404718.1	XP_013404718.1 uncharacterized protein K02A2.6 [Lingula anatina]	RNase_HI_RT_Ty3	1.42e-137	Lingula anatina	Brachiopoda
TRINITY_DN17714_c0_g1_i7	1705	294	XP_003223844.2	XP_003223844.2 PREDICTED: solute carrier family 35 member G1 [Anolis carolinensis]	#N/A	1.09e-10	Anolis carolinensis	Chordata
TRINITY_DN17714_c0_g1_i7	1705	294	XP_008120584.1	XP_008120584.1 PREDICTED: zinc finger MYM-type protein 1-like [Anolis carolinensis]	#N/A	3.17e-10	Anolis carolinensis	Chordata
TRINITY_DN17714_c0_g1_i7	1705	294	XP_008116309.2	XP_008116309.2 PREDICTED: uncharacterized protein LOC103280141 [Anolis carolinensis]	#N/A	3.71e-10	Anolis carolinensis	Chordata
TRINITY_DN17714_c0_g1_i7	1705	294	XP_008106930.1	XP_008106930.1 PREDICTED: zinc finger MYM-type protein 1-like [Anolis carolinensis]	#N/A	4.15e-10	Anolis carolinensis	Chordata
TRINITY_DN17714_c0_g1_i7	1705	294	XP_008113471.1	XP_008113471.1 PREDICTED: zinc finger MYM-type protein 1-like [Anolis carolinensis]	#N/A	4.72e-10	Anolis carolinensis	Chordata
TRINITY_DN17714_c0_g1_i7	1705	294	XP_003216573.1	XP_003216573.1 PREDICTED: zinc finger MYM-type protein 1-like [Anolis carolinensis]	#N/A	4.72e-10	Anolis carolinensis	Chordata
TRINITY_DN17714_c0_g1_i7	1705	294	XP_008105126.1	XP_008105126.1 PREDICTED: zinc finger MYM-type protein 1 [Anolis carolinensis]	#N/A	8.03e-10	Anolis carolinensis	Chordata
TRINITY_DN17714_c0_g1_i7	1705	294	XP_016850957.1	XP_016850957.1 PREDICTED: zinc finger MYM-type protein 1-like [Anolis carolinensis]	#N/A	2.47e-09	Anolis carolinensis	Chordata
TRINITY_DN17714_c0_g1_i7	1705	294	XP_016852373.1	XP_016852373.1 PREDICTED: zinc finger MYM-type protein 1-like [Anolis carolinensis]	#N/A	3.35e-09	Anolis carolinensis	Chordata
TRINITY_DN17714_c0_g1_i7	1705	294	XP_016850373.1	XP_016850373.1 PREDICTED: zinc finger MYM-type protein 1-like [Anolis carolinensis]	#N/A	7.73e-09	Anolis carolinensis	Chordata
TRINITY_DN17714_c0_g1_i7	1705	294	XP_008122104.2	XP_008122104.2 PREDICTED: zinc finger MYM-type protein 1 isoform X1 [Anolis carolinensis]	#N/A	9.96e-09	Anolis carolinensis	Chordata
TRINITY_DN17714_c0_g1_i7	1705	294	XP_008122105.2	XP_008122105.2 PREDICTED: zinc finger MYM-type protein 1 isoform X2 [Anolis carolinensis]	#N/A	1.72e-08	Anolis carolinensis	Chordata
TRINITY_DN17714_c0_g1_i7	1705	294	XP_028153568.1	XP_028153568.1 zinc finger MYM-type protein 5-like [Diabrotica virgifera virgifera]	#N/A	9.12e-06	Diabrotica virgifera virgifera	Arthropoda
TRINITY_DN17714_c0_g1_i7	1705	294	XP_008122728.1	XP_008122728.1 PREDICTED: zinc finger MYM-type protein 5 [Anolis carolinensis]	#N/A	5.03e-05	Anolis carolinensis	Chordata
TRINITY_DN3013_c0_g1_i25	3281	292	GBP84379.1	GBP84379.1 Transcriptional repressor CTCF [Eumeta japonica]	COG5048	8.23e-09	Eumeta japonica	Arthropoda
TRINITY_DN3013_c0_g1_i25	3281	292	NXH20960.1	NXH20960.1 ZN431 protein [Bucco capensis]	COG5048	8.33e-09	Bucco capensis	Chordata
TRINITY_DN3013_c0_g1_i25	3281	292	XP_033803990.1	XP_033803990.1 zinc finger X-chromosomal protein isoform X2 [Geotrypetes seraphini]	COG5048	1.51e-08	Geotrypetes seraphini	Chordata
TRINITY_DN3013_c0_g1_i25	3281	292	XP_033803987.1	XP_033803987.1 zinc finger X-chromosomal protein isoform X1 [Geotrypetes seraphini]	COG5048	1.58e-08	Geotrypetes seraphini	Chordata
TRINITY_DN3013_c0_g1_i25	3281	292	KFQ28284.1	KFQ28284.1 Zinc finger protein 383, partial [Mesitornis unicolor]	COG5048	3.24e-08	Mesitornis unicolor	Chordata
TRINITY_DN3013_c0_g1_i25	3281	292	XP_030058240.1	XP_030058240.1 zinc finger X-chromosomal protein isoform X1 [Microcaecilia unicolor]	COG5048	3.51e-08	Microcaecilia unicolor	Chordata
TRINITY_DN3013_c0_g1_i25	3281	292	CAD7622123.1	CAD7622123.1 unnamed protein product [Medioppia subpectinata]	COG5048	8.56e-08	Medioppia subpectinata	Arthropoda
TRINITY_DN3013_c0_g1_i25	3281	292	NXN46130.1	NXN46130.1 ZN345 protein [Rhinoptilus africanus]	COG5048	9.37e-08	Rhinoptilus africanus	Chordata
TRINITY_DN3013_c0_g1_i25	3281	292	XP_024219425.1	XP_024219425.1 zinc finger protein 676-like [Halyomorpha halys]	COG5048	9.54e-08	Halyomorpha halys	Arthropoda
TRINITY_DN3013_c0_g1_i25	3281	292	NXT77983.1	NXT77983.1 ZN570 protein [Zapornia atra]	COG5048	1.14e-07	Zapornia atra	Chordata
TRINITY_DN3013_c0_g1_i25	3281	292	NXV72712.1	NXV72712.1 ZN468 protein [Atlantisia rogersi]	COG5048	1.16e-07	Atlantisia rogersi	Chordata
TRINITY_DN3013_c0_g1_i25	3281	292	XP_007901233.2	XP_007901233.2 LOW QUALITY PROTEIN: zinc finger X-chromosomal protein [Callorhinchus milii]	COG5048	1.43e-07	Callorhinchus milii	Chordata
TRINITY_DN3013_c0_g1_i25	3281	292	CAD7225109.1	CAD7225109.1 unnamed protein product [Cyprideis torosa]	COG5048	1.53e-07	Cyprideis torosa	Arthropoda
TRINITY_DN3013_c0_g1_i25	3281	292	XP_036857013.1	XP_036857013.1 zinc finger X-chromosomal protein [Manis javanica]	COG5048	1.86e-07	Manis javanica	Chordata
TRINITY_DN3013_c0_g1_i25	3281	292	XP_022113413.1	XP_022113413.1 uncharacterized protein LOC110992057 isoform X2 [Pieris rapae]	COG5048	2.11e-07	Pieris rapae	Arthropoda
TRINITY_DN3013_c0_g1_i25	3281	292	XP_022113412.1	XP_022113412.1 uncharacterized protein LOC110992057 isoform X1 [Pieris rapae]	COG5048	2.12e-07	Pieris rapae	Arthropoda
TRINITY_DN3013_c0_g1_i25	3281	292	KAF7988628.1	KAF7988628.1 hypothetical protein HCN44_001201 [Aphidius gifuensis]	COG5048	3.36e-07	Aphidius gifuensis	Arthropoda
TRINITY_DN3013_c0_g1_i25	3281	292	XP_035873154.1	XP_035873154.1 zinc finger X-chromosomal protein-like isoform X5 [Phyllostomus discolor]	COG5048	3.53e-07	Phyllostomus discolor	Chordata
TRINITY_DN3013_c0_g1_i25	3281	292	XP_028359536.1	XP_028359536.1 zinc finger X-chromosomal protein-like isoform X4 [Phyllostomus discolor]	COG5048	4.06e-07	Phyllostomus discolor	Chordata
TRINITY_DN3013_c0_g1_i25	3281	292	XP_035873153.1	XP_035873153.1 zinc finger X-chromosomal protein-like isoform X3 [Phyllostomus discolor]	COG5048	4.07e-07	Phyllostomus discolor	Chordata
TRINITY_DN1677_c0_g2_i1	3073	256	KAE8609391.1	KAE8609391.1 hypothetical protein XENTR_v10011796 [Xenopus tropicalis]	RILP-like superfamily	7.34e-08	Xenopus tropicalis	Chordata
TRINITY_DN1677_c0_g2_i1	3073	256	XP_026160965.1	XP_026160965.1 afadin- and alpha-actinin-binding protein-like isoform X2 [Mastacembelus armatus]	RILP-like superfamily	4.04e-07	Mastacembelus armatus	Chordata
TRINITY_DN1677_c0_g2_i1	3073	256	XP_026160964.1	XP_026160964.1 afadin- and alpha-actinin-binding protein-like isoform X1 [Mastacembelus armatus]	RILP-like superfamily	5.34e-07	Mastacembelus armatus	Chordata
TRINITY_DN1677_c0_g2_i1	3073	256	XP_013415215.1	XP_013415215.1 afadin- and alpha-actinin-binding protein B [Lingula anatina]	RILP-like superfamily	6.08e-07	Lingula anatina	Brachiopoda
TRINITY_DN1677_c0_g2_i1	3073	256	XP_035272277.1	XP_035272277.1 synovial sarcoma, X breakpoint 2 interacting protein a isoform X2 [Anguilla anguilla]	RILP-like superfamily	9.14e-07	Anguilla anguilla	Chordata
TRINITY_DN1677_c0_g2_i1	3073	256	XP_035272272.1	XP_035272272.1 synovial sarcoma, X breakpoint 2 interacting protein a isoform X1 [Anguilla anguilla]	RILP-like superfamily	9.15e-07	Anguilla anguilla	Chordata
TRINITY_DN1677_c0_g2_i1	3073	256	XP_034002061.1	XP_034002061.1 afadin- and alpha-actinin-binding protein-like isoform X2 [Trematomus bernacchii]	RILP-like superfamily	1.62e-06	Trematomus bernacchii	Chordata
TRINITY_DN1677_c0_g2_i1	3073	256	XP_034002062.1	XP_034002062.1 afadin- and alpha-actinin-binding protein-like isoform X3 [Trematomus bernacchii]	RILP-like superfamily	1.62e-06	Trematomus bernacchii	Chordata
TRINITY_DN1677_c0_g2_i1	3073	256	XP_034002059.1	XP_034002059.1 afadin- and alpha-actinin-binding protein-like isoform X1 [Trematomus bernacchii]	RILP-like superfamily	1.62e-06	Trematomus bernacchii	Chordata
TRINITY_DN1677_c0_g2_i1	3073	256	XP_027882584.1	XP_027882584.1 afadin- and alpha-actinin-binding protein-like isoform X3 [Xiphophorus couchianus]	RILP-like superfamily	1.63e-06	Xiphophorus couchianus	Chordata
TRINITY_DN1677_c0_g2_i1	3073	256	XP_027882583.1	XP_027882583.1 afadin- and alpha-actinin-binding protein-like isoform X2 [Xiphophorus couchianus]	RILP-like superfamily	1.66e-06	Xiphophorus couchianus	Chordata
TRINITY_DN1677_c0_g2_i1	3073	256	XP_027882581.1	XP_027882581.1 afadin- and alpha-actinin-binding protein-like isoform X1 [Xiphophorus couchianus]	RILP-like superfamily	1.69e-06	Xiphophorus couchianus	Chordata
TRINITY_DN1677_c0_g2_i1	3073	256	OCT82514.1	OCT82514.1 hypothetical protein XELAEV_18025046mg [Xenopus laevis]	RILP-like superfamily	2.04e-06	Xenopus laevis	Chordata
TRINITY_DN1677_c0_g2_i1	3073	256	NP_001084793.1	NP_001084793.1 afadin- and alpha-actinin-binding protein A [Xenopus laevis]	RILP-like superfamily	2.04e-06	Xenopus laevis	Chordata
TRINITY_DN1677_c0_g2_i1	3073	256	KAE8609390.1	KAE8609390.1 hypothetical protein XENTR_v10011796 [Xenopus tropicalis]	RILP-like superfamily	2.04e-06	Xenopus tropicalis	Chordata
TRINITY_DN1677_c0_g2_i1	3073	256	XP_031756707.1	XP_031756707.1 afadin- and alpha-actinin-binding protein isoform X2 [Xenopus tropicalis]	RILP-like superfamily	2.05e-06	Xenopus tropicalis	Chordata
TRINITY_DN1677_c0_g2_i1	3073	256	XP_031756706.1	XP_031756706.1 afadin- and alpha-actinin-binding protein isoform X1 [Xenopus tropicalis]	RILP-like superfamily	2.06e-06	Xenopus tropicalis	Chordata
TRINITY_DN1677_c0_g2_i1	3073	256	XP_032429195.1	XP_032429195.1 afadin- and alpha-actinin-binding protein-like isoform X2 [Xiphophorus hellerii]	RILP-like superfamily	2.14e-06	Xiphophorus hellerii	Chordata
TRINITY_DN1677_c0_g2_i1	3073	256	XP_014908171.1	XP_014908171.1 PREDICTED: afadin- and alpha-actinin-binding protein-like isoform X2 [Poecilia latipinna]	RILP-like superfamily	2.14e-06	Poecilia latipinna	Chordata
TRINITY_DN1677_c0_g2_i1	3073	256	XP_032429194.1	XP_032429194.1 afadin- and alpha-actinin-binding protein-like isoform X1 [Xiphophorus hellerii]	RILP-like superfamily	2.18e-06	Xiphophorus hellerii	Chordata
TRINITY_DN6160_c1_g1_i6	2937	246	XP_028146478.1	XP_028146478.1 E3 SUMO-protein ligase KIAA1586-like [Diabrotica virgifera virgifera]	DUF4371 superfamily	1.08e-218	Diabrotica virgifera virgifera	Arthropoda
TRINITY_DN6160_c1_g1_i6	2937	246	XP_030046369.1	XP_030046369.1 E3 SUMO-protein ligase KIAA1586-like [Microcaecilia unicolor]	DUF4371 superfamily	3.05e-204	Microcaecilia unicolor	Chordata
TRINITY_DN6160_c1_g1_i6	2937	246	XP_034981522.1	XP_034981522.1 peroxisome biogenesis factor 2 isoform X1 [Zootoca vivipara]	DUF4371 superfamily	7.28e-195	Zootoca vivipara	Chordata
TRINITY_DN6160_c1_g1_i6	2937	246	XP_033011354.1	XP_033011354.1 peroxisome biogenesis factor 2 isoform X1 [Lacerta agilis]	DUF4371 superfamily	1.24e-192	Lacerta agilis	Chordata
TRINITY_DN6160_c1_g1_i6	2937	246	XP_015277122.1	XP_015277122.1 PREDICTED: uncharacterized protein KIAA1586-like [Gekko japonicus]	DUF4371 superfamily	2.76e-177	Gekko japonicus	Chordata
TRINITY_DN6160_c1_g1_i6	2937	246	XP_015284597.1	XP_015284597.1 PREDICTED: uncharacterized protein KIAA1586-like [Gekko japonicus]	DUF4371 superfamily	3.28e-168	Gekko japonicus	Chordata
TRINITY_DN6160_c1_g1_i6	2937	246	KAF5281765.1	KAF5281765.1 hypothetical protein FQR65_LT14560 [Abscondita terminalis]	DUF4371 superfamily	1.13e-151	Abscondita terminalis	Arthropoda
TRINITY_DN6160_c1_g1_i6	2937	246	XP_040185820.1	XP_040185820.1 E3 SUMO-protein ligase KIAA1586-like [Rana temporaria]	DUF4371 superfamily	5.27e-151	Rana temporaria	Chordata
TRINITY_DN6160_c1_g1_i6	2937	246	XP_040195664.1	XP_040195664.1 E3 SUMO-protein ligase KIAA1586-like [Rana temporaria]	DUF4371 superfamily	1.8e-150	Rana temporaria	Chordata
TRINITY_DN6160_c1_g1_i6	2937	246	XP_040286010.1	XP_040286010.1 E3 SUMO-protein ligase KIAA1586-like [Bufo bufo]	DUF4371 superfamily	1.8e-150	Bufo bufo	Chordata
TRINITY_DN6160_c1_g1_i6	2937	246	XP_040275875.1	XP_040275875.1 E3 SUMO-protein ligase KIAA1586-like [Bufo bufo]	DUF4371 superfamily	9.9e-150	Bufo bufo	Chordata
TRINITY_DN6160_c1_g1_i6	2937	246	XP_040264711.1	XP_040264711.1 E3 SUMO-protein ligase KIAA1586-like [Bufo bufo]	DUF4371 superfamily	9.9e-150	Bufo bufo	Chordata
TRINITY_DN6160_c1_g1_i6	2937	246	XP_040275695.1	XP_040275695.1 E3 SUMO-protein ligase KIAA1586-like [Bufo bufo]	DUF4371 superfamily	1.39e-149	Bufo bufo	Chordata
TRINITY_DN6160_c1_g1_i6	2937	246	XP_040271681.1	XP_040271681.1 E3 SUMO-protein ligase KIAA1586-like [Bufo bufo]	DUF4371 superfamily	4.19e-148	Bufo bufo	Chordata
TRINITY_DN6160_c1_g1_i6	2937	246	RXN14539.1	RXN14539.1 E3 SUMO-protein ligase KIAA1586-like [Labeo rohita]	DUF4371 superfamily	1.04e-147	Labeo rohita	Chordata
TRINITY_DN6160_c1_g1_i6	2937	246	XP_029837391.2	XP_029837391.2 E3 SUMO-protein ligase KIAA1586-like [Ixodes scapularis]	DUF4371 superfamily	7.24e-146	Ixodes scapularis	Arthropoda
TRINITY_DN6160_c1_g1_i6	2937	246	RXN13095.1	RXN13095.1 E3 SUMO-protein ligase KIAA1586-like [Labeo rohita]	DUF4371 superfamily	8.59e-146	Labeo rohita	Chordata
TRINITY_DN6160_c1_g1_i6	2937	246	XP_040069819.1	XP_040069819.1 E3 SUMO-protein ligase KIAA1586-like [Ixodes scapularis]	DUF4371 superfamily	1.43e-145	Ixodes scapularis	Arthropoda
TRINITY_DN6160_c1_g1_i6	2937	246	XP_040064332.2	XP_040064332.2 E3 SUMO-protein ligase KIAA1586-like [Ixodes scapularis]	DUF4371 superfamily	2.01e-145	Ixodes scapularis	Arthropoda
TRINITY_DN6160_c1_g1_i6	2937	246	XP_040065338.1	XP_040065338.1 E3 SUMO-protein ligase KIAA1586-like [Ixodes scapularis]	DUF4371 superfamily	4.41e-144	Ixodes scapularis	Arthropoda
TRINITY_DN13593_c0_g1_i4	2541	244	KAF5298636.1	KAF5298636.1 hypothetical protein FQR65_LT09732 [Abscondita terminalis]	COG5048	7.76e-09	Abscondita terminalis	Arthropoda
TRINITY_DN13593_c0_g1_i4	2541	244	OBS66141.1	OBS66141.1 hypothetical protein A6R68_05320, partial [Neotoma lepida]	COG5048	1.08e-08	Neotoma lepida	Chordata
TRINITY_DN13593_c0_g1_i4	2541	244	VDI36272.1	VDI36272.1 KRAB domain-containing zinc finger protein, partial [Mytilus galloprovincialis]	COG5048	2.5e-08	Mytilus galloprovincialis	Mollusca
TRINITY_DN13593_c0_g1_i4	2541	244	VDI36273.1	VDI36273.1 Hypothetical predicted protein [Mytilus galloprovincialis]	COG5048	2.57e-08	Mytilus galloprovincialis	Mollusca
TRINITY_DN13593_c0_g1_i4	2541	244	CAC5386990.1	CAC5386990.1 KRAB [Mytilus coruscus]	COG5048	6.32e-08	Mytilus coruscus	Mollusca
TRINITY_DN13593_c0_g1_i4	2541	244	CAG2243002.1	CAG2243002.1 KRAB [Mytilus edulis]	COG5048	6.81e-08	Mytilus edulis	Mollusca
TRINITY_DN13593_c0_g1_i4	2541	244	CAG2257261.1	CAG2257261.1 KRAB [Mytilus edulis]	COG5048	6.89e-08	Mytilus edulis	Mollusca
TRINITY_DN13593_c0_g1_i4	2541	244	XP_038956652.1	XP_038956652.1 zinc finger Y-chromosomal protein 2 [Rattus norvegicus]	COG5048	3.83e-07	Rattus norvegicus	Chordata
TRINITY_DN13593_c0_g1_i4	2541	244	XP_039449971.1	XP_039449971.1 zinc finger protein 799-like [Culex pipiens pallens]	COG5048	5.14e-07	Culex pipiens pallens	Arthropoda
TRINITY_DN13593_c0_g1_i4	2541	244	XP_034944297.1	XP_034944297.1 zinc finger protein 557-like [Chelonus insularis]	COG5048	8.57e-07	Chelonus insularis	Arthropoda
TRINITY_DN13593_c0_g1_i4	2541	244	XP_015518905.1	XP_015518905.1 PREDICTED: zinc finger protein 2 homolog [Neodiprion lecontei]	COG5048	1.03e-06	Neodiprion lecontei	Arthropoda
TRINITY_DN13593_c0_g1_i4	2541	244	CAG2229355.1	CAG2229355.1 KRAB [Mytilus edulis]	COG5048	1.27e-06	Mytilus edulis	Mollusca
TRINITY_DN13593_c0_g1_i4	2541	244	XP_035716738.1	XP_035716738.1 zinc finger protein 2 homolog isoform X2 [Folsomia candida]	COG5048	1.48e-06	Folsomia candida	Arthropoda
TRINITY_DN13593_c0_g1_i4	2541	244	XP_021965833.1	XP_021965833.1 zinc finger protein 2 homolog isoform X1 [Folsomia candida]	COG5048	1.49e-06	Folsomia candida	Arthropoda
TRINITY_DN13593_c0_g1_i4	2541	244	KAG5669175.1	KAG5669175.1 hypothetical protein PVAND_017069 [Polypedilum vanderplanki]	COG5048	1.6e-06	Polypedilum vanderplanki	Arthropoda
TRINITY_DN13593_c0_g1_i4	2541	244	XP_022911123.1	XP_022911123.1 oocyte zinc finger protein XlCOF6.1-like isoform X2 [Onthophagus taurus]	COG5048	1.75e-06	Onthophagus taurus	Arthropoda
TRINITY_DN13593_c0_g1_i4	2541	244	XP_022911122.1	XP_022911122.1 oocyte zinc finger protein XlCOF6.1-like isoform X1 [Onthophagus taurus]	COG5048	1.76e-06	Onthophagus taurus	Arthropoda
TRINITY_DN13593_c0_g1_i4	2541	244	XP_001868218.2	XP_001868218.2 zinc finger protein 271 [Culex quinquefasciatus]	COG5048	2.5e-06	Culex quinquefasciatus	Arthropoda
TRINITY_DN13593_c0_g1_i4	2541	244	XP_018294322.1	XP_018294322.1 C2H2-type zinc finger transcription factor, partial [Phycomyces blakesleeanus NRRL 1555(-)]	COG5048	3.02e-06	Phycomyces blakesleeanus NRRL 1555(-)	Mucoromycota
TRINITY_DN13593_c0_g1_i4	2541	244	XP_022064049.1	XP_022064049.1 endothelial zinc finger protein induced by tumor necrosis factor alpha-like [Acanthochromis polyacanthus]	COG5048	3.11e-06	Acanthochromis polyacanthus	Chordata
TRINITY_DN7373_c0_g1_i11	3132	242	CAB0008842.1	CAB0008842.1 unnamed protein product [Nesidiocoris tenuis]	Integrase_H2C2	1.55e-102	Nesidiocoris tenuis	Arthropoda
TRINITY_DN7373_c0_g1_i11	3132	242	XP_036435970.1	XP_036435970.1 uncharacterized protein K02A2.6-like isoform X1 [Colossoma macropomum]	Integrase_H2C2	5.93e-96	Colossoma macropomum	Chordata
TRINITY_DN7373_c0_g1_i11	3132	242	XP_037107948.1	XP_037107948.1 uncharacterized protein K02A2.6-like [Syngnathus acus]	Integrase_H2C2	2.42e-94	Syngnathus acus	Chordata
TRINITY_DN7373_c0_g1_i11	3132	242	KAE8288391.1	KAE8288391.1 Retrovirus-related Pol polyprotein from transposon 17.6 Protease [Larimichthys crocea]	Integrase_H2C2	2.35e-93	Larimichthys crocea	Chordata
TRINITY_DN7373_c0_g1_i11	3132	242	KAE8281698.1	KAE8281698.1 Retrovirus-related Pol polyprotein from transposon 17.6 Protease [Larimichthys crocea]	Integrase_H2C2	5.09e-93	Larimichthys crocea	Chordata
TRINITY_DN7373_c0_g1_i11	3132	242	XP_019204182.1	XP_019204182.1 uncharacterized protein LOC106097043 [Oreochromis niloticus]	Integrase_H2C2	9.26e-92	Oreochromis niloticus	Chordata
TRINITY_DN7373_c0_g1_i11	3132	242	XP_036001498.1	XP_036001498.1 uncharacterized protein K02A2.6-like [Fundulus heteroclitus]	Integrase_H2C2	1.54e-91	Fundulus heteroclitus	Chordata
TRINITY_DN7373_c0_g1_i11	3132	242	CAB0019152.1	CAB0019152.1 unnamed protein product [Nesidiocoris tenuis]	Integrase_H2C2	2.75e-91	Nesidiocoris tenuis	Arthropoda
TRINITY_DN7373_c0_g1_i11	3132	242	KAG1925385.1	KAG1925385.1 retrotransposable element, partial [Pimephales promelas]	Integrase_H2C2	1.63e-90	Pimephales promelas	Chordata
TRINITY_DN7373_c0_g1_i11	3132	242	XP_024658585.1	XP_024658585.1 uncharacterized protein K02A2.6-like [Maylandia zebra]	Integrase_H2C2	5.56e-90	Maylandia zebra	Chordata
TRINITY_DN7373_c0_g1_i11	3132	242	XP_032218360.1	XP_032218360.1 uncharacterized protein K02A2.6-like [Nematostella vectensis]	Integrase_H2C2	6.64e-90	Nematostella vectensis	Cnidaria
TRINITY_DN7373_c0_g1_i11	3132	242	XP_027864509.1	XP_027864509.1 uncharacterized protein K02A2.6-like [Xiphophorus couchianus]	Integrase_H2C2	2.55e-89	Xiphophorus couchianus	Chordata
TRINITY_DN7373_c0_g1_i11	3132	242	XP_028417985.1	XP_028417985.1 uncharacterized protein K02A2.6-like [Dendronephthya gigantea]	Integrase_H2C2	4.25e-89	Dendronephthya gigantea	Cnidaria
TRINITY_DN7373_c0_g1_i11	3132	242	XP_028418586.1	XP_028418586.1 uncharacterized protein K02A2.6-like [Dendronephthya gigantea]	Integrase_H2C2	1.9e-88	Dendronephthya gigantea	Cnidaria
TRINITY_DN7373_c0_g1_i11	3132	242	XP_025753259.1	XP_025753259.1 uncharacterized protein K02A2.6-like [Oreochromis niloticus]	Integrase_H2C2	2.07e-88	Oreochromis niloticus	Chordata
TRINITY_DN7373_c0_g1_i11	3132	242	KMQ89584.1	KMQ89584.1 retrovirus-related pol polyprotein from transposon opus [Lasius niger]	Integrase_H2C2	5.35e-88	Lasius niger	Arthropoda
TRINITY_DN7373_c0_g1_i11	3132	242	XP_030294955.1	XP_030294955.1 uncharacterized protein K02A2.6-like [Sparus aurata]	Integrase_H2C2	5.49e-88	Sparus aurata	Chordata
TRINITY_DN7373_c0_g1_i11	3132	242	XP_032235374.1	XP_032235374.1 uncharacterized protein K02A2.6-like [Nematostella vectensis]	Integrase_H2C2	5.51e-88	Nematostella vectensis	Cnidaria
TRINITY_DN7373_c0_g1_i11	3132	242	XP_028416573.1	XP_028416573.1 uncharacterized protein K02A2.6-like [Dendronephthya gigantea]	Integrase_H2C2	7.23e-88	Dendronephthya gigantea	Cnidaria
TRINITY_DN7373_c0_g1_i11	3132	242	XP_031335291.1	XP_031335291.1 uncharacterized protein K02A2.6-like [Photinus pyralis]	Integrase_H2C2	8.06e-88	Photinus pyralis	Arthropoda
TRINITY_DN6203_c0_g1_i2	3626	236	XP_037355956.1	XP_037355956.1 zinc finger MYM-type protein 1 isoform X4 [Talpa occidentalis]	DUF4371 superfamily	3.54e-204	Talpa occidentalis	Chordata
TRINITY_DN6203_c0_g1_i2	3626	236	XP_012497696.1	XP_012497696.1 PREDICTED: zinc finger MYM-type protein 1 isoform X2 [Propithecus coquereli]	DUF4371 superfamily	7.32e-203	Propithecus coquereli	Chordata
TRINITY_DN6203_c0_g1_i2	3626	236	XP_030883166.1	XP_030883166.1 zinc finger MYM-type protein 1 isoform X5 [Leptonychotes weddellii]	DUF4371 superfamily	1.94e-202	Leptonychotes weddellii	Chordata
TRINITY_DN6203_c0_g1_i2	3626	236	XP_041594714.1	XP_041594714.1 zinc finger MYM-type protein 1 isoform X4 [Vulpes lagopus]	DUF4371 superfamily	3.73e-202	Vulpes lagopus	Chordata
TRINITY_DN6203_c0_g1_i2	3626	236	XP_034875035.1	XP_034875035.1 zinc finger MYM-type protein 1 isoform X4 [Mirounga leonina]	DUF4371 superfamily	5.42e-202	Mirounga leonina	Chordata
TRINITY_DN6203_c0_g1_i2	3626	236	XP_035921199.1	XP_035921199.1 zinc finger MYM-type protein 1 isoform X5 [Halichoerus grypus]	DUF4371 superfamily	7.63e-202	Halichoerus grypus	Chordata
TRINITY_DN6203_c0_g1_i2	3626	236	XP_025847567.1	XP_025847567.1 zinc finger MYM-type protein 1 isoform X4 [Vulpes vulpes]	DUF4371 superfamily	1.29e-201	Vulpes vulpes	Chordata
TRINITY_DN6203_c0_g1_i2	3626	236	XP_025847566.1	XP_025847566.1 zinc finger MYM-type protein 1 isoform X3 [Vulpes vulpes]	DUF4371 superfamily	2.06e-201	Vulpes vulpes	Chordata
TRINITY_DN6203_c0_g1_i2	3626	236	XP_030883165.1	XP_030883165.1 zinc finger MYM-type protein 1 isoform X4 [Leptonychotes weddellii]	DUF4371 superfamily	2.29e-201	Leptonychotes weddellii	Chordata
TRINITY_DN6203_c0_g1_i2	3626	236	XP_014639618.1	XP_014639618.1 PREDICTED: zinc finger MYM-type protein 1 isoform X4 [Ceratotherium simum simum]	DUF4371 superfamily	4.09e-201	Ceratotherium simum simum	Chordata
TRINITY_DN6203_c0_g1_i2	3626	236	XP_034875034.1	XP_034875034.1 zinc finger MYM-type protein 1 isoform X3 [Mirounga leonina]	DUF4371 superfamily	6.37e-201	Mirounga leonina	Chordata
TRINITY_DN6203_c0_g1_i2	3626	236	XP_035921198.1	XP_035921198.1 zinc finger MYM-type protein 1 isoform X4 [Halichoerus grypus]	DUF4371 superfamily	8.96e-201	Halichoerus grypus	Chordata
TRINITY_DN6203_c0_g1_i2	3626	236	XP_032244119.1	XP_032244119.1 zinc finger MYM-type protein 1 isoform X5 [Phoca vitulina]	DUF4371 superfamily	1.18e-200	Phoca vitulina	Chordata
TRINITY_DN6203_c0_g1_i2	3626	236	XP_041594713.1	XP_041594713.1 zinc finger MYM-type protein 1 isoform X3 [Vulpes lagopus]	DUF4371 superfamily	1.32e-200	Vulpes lagopus	Chordata
TRINITY_DN6203_c0_g1_i2	3626	236	XP_023583022.1	XP_023583022.1 zinc finger MYM-type protein 1 isoform X2 [Trichechus manatus latirostris]	DUF4371 superfamily	1.45e-200	Trichechus manatus latirostris	Chordata
TRINITY_DN6203_c0_g1_i2	3626	236	XP_034504874.1	XP_034504874.1 zinc finger MYM-type protein 1 isoform X5 [Ailuropoda melanoleuca]	DUF4371 superfamily	1.66e-200	Ailuropoda melanoleuca	Chordata
TRINITY_DN6203_c0_g1_i2	3626	236	XP_021539361.1	XP_021539361.1 zinc finger MYM-type protein 1-like [Neomonachus schauinslandi]	DUF4371 superfamily	2.86e-200	Neomonachus schauinslandi	Chordata
TRINITY_DN6203_c0_g1_i2	3626	236	XP_037355953.1	XP_037355953.1 zinc finger MYM-type protein 1 isoform X3 [Talpa occidentalis]	DUF4371 superfamily	5.34e-200	Talpa occidentalis	Chordata
TRINITY_DN6203_c0_g1_i2	3626	236	XP_030883164.1	XP_030883164.1 zinc finger MYM-type protein 1 isoform X3 [Leptonychotes weddellii]	DUF4371 superfamily	5.49e-200	Leptonychotes weddellii	Chordata
TRINITY_DN6203_c0_g1_i2	3626	236	XP_030883163.1	XP_030883163.1 zinc finger MYM-type protein 1 isoform X2 [Leptonychotes weddellii]	DUF4371 superfamily	5.49e-200	Leptonychotes weddellii	Chordata
TRINITY_DN29896_c0_g1_i1	1971	232	XP_004211859.2	XP_004211859.2 PREDICTED: zinc finger BED domain-containing protein 4-like, partial [Hydra vulgaris]	#N/A	6.67e-90	Hydra vulgaris	Cnidaria
TRINITY_DN29896_c0_g1_i1	1971	232	XP_041830887.1	XP_041830887.1 zinc finger BED domain-containing protein 4-like [Melanotaenia boesemani]	#N/A	7.55e-81	Melanotaenia boesemani	Chordata
TRINITY_DN29896_c0_g1_i1	1971	232	KTG46288.1	KTG46288.1 hypothetical protein cypCar_00025097 [Cyprinus carpio]	#N/A	2.76e-80	Cyprinus carpio	Chordata
TRINITY_DN29896_c0_g1_i1	1971	232	XP_026125748.1	XP_026125748.1 zinc finger BED domain-containing protein 4-like [Carassius auratus]	#N/A	5.89e-79	Carassius auratus	Chordata
TRINITY_DN29896_c0_g1_i1	1971	232	XP_038157148.1	XP_038157148.1 zinc finger BED domain-containing protein 4-like [Cyprinodon tularosa]	#N/A	1.01e-78	Cyprinodon tularosa	Chordata
TRINITY_DN29896_c0_g1_i1	1971	232	XP_026119237.1	XP_026119237.1 zinc finger BED domain-containing protein 4-like [Carassius auratus]	#N/A	1.15e-78	Carassius auratus	Chordata
TRINITY_DN29896_c0_g1_i1	1971	232	XP_026113464.1	XP_026113464.1 zinc finger BED domain-containing protein 4-like [Carassius auratus]	#N/A	1.15e-78	Carassius auratus	Chordata
TRINITY_DN29896_c0_g1_i1	1971	232	XP_026119748.1	XP_026119748.1 zinc finger BED domain-containing protein 4-like [Carassius auratus]	#N/A	1.15e-78	Carassius auratus	Chordata
TRINITY_DN29896_c0_g1_i1	1971	232	XP_032358832.1	XP_032358832.1 zinc finger BED domain-containing protein 4-like [Etheostoma spectabile]	#N/A	1.24e-78	Etheostoma spectabile	Chordata
TRINITY_DN29896_c0_g1_i1	1971	232	XP_018947159.2	XP_018947159.2 zinc finger BED domain-containing protein 4-like [Cyprinus carpio]	#N/A	1.61e-78	Cyprinus carpio	Chordata
TRINITY_DN29896_c0_g1_i1	1971	232	XP_026084899.1	XP_026084899.1 zinc finger BED domain-containing protein 4-like [Carassius auratus]	#N/A	2.8e-78	Carassius auratus	Chordata
TRINITY_DN29896_c0_g1_i1	1971	232	XP_019133959.2	XP_019133959.2 zinc finger BED domain-containing protein 4 [Larimichthys crocea]	#N/A	3.07e-78	Larimichthys crocea	Chordata
TRINITY_DN29896_c0_g1_i1	1971	232	XP_003389647.1	XP_003389647.1 PREDICTED: zinc finger BED domain-containing protein 4-like [Amphimedon queenslandica]	#N/A	4.3e-78	Amphimedon queenslandica	Porifera
TRINITY_DN29896_c0_g1_i1	1971	232	XP_042630649.1	XP_042630649.1 zinc finger BED domain-containing protein 4-like [Cyprinus carpio]	#N/A	8.59e-78	Cyprinus carpio	Chordata
TRINITY_DN29896_c0_g1_i1	1971	232	XP_026087257.1	XP_026087257.1 zinc finger BED domain-containing protein 4-like [Carassius auratus]	#N/A	9.13e-78	Carassius auratus	Chordata
TRINITY_DN29896_c0_g1_i1	1971	232	XP_023657625.1	XP_023657625.1 zinc finger BED domain-containing protein 4-like [Paramormyrops kingsleyae]	#N/A	6.26e-77	Paramormyrops kingsleyae	Chordata
TRINITY_DN29896_c0_g1_i1	1971	232	XP_005466359.2	XP_005466359.2 zinc finger BED domain-containing protein 4-like [Oreochromis niloticus]	#N/A	1.1e-76	Oreochromis niloticus	Chordata
TRINITY_DN29896_c0_g1_i1	1971	232	XP_035990535.1	XP_035990535.1 zinc finger BED domain-containing protein 4-like [Fundulus heteroclitus]	#N/A	2.11e-76	Fundulus heteroclitus	Chordata
TRINITY_DN29896_c0_g1_i1	1971	232	XP_039530532.1	XP_039530532.1 zinc finger BED domain-containing protein 4-like [Pimephales promelas]	#N/A	2.16e-76	Pimephales promelas	Chordata
TRINITY_DN29896_c0_g1_i1	1971	232	XP_013123406.2	XP_013123406.2 zinc finger BED domain-containing protein 4 [Oreochromis niloticus]	#N/A	2.23e-76	Oreochromis niloticus	Chordata
TRINITY_DN6203_c0_g1_i5	3651	222	XP_037355956.1	XP_037355956.1 zinc finger MYM-type protein 1 isoform X4 [Talpa occidentalis]	DUF4371 superfamily	4.96e-217	Talpa occidentalis	Chordata
TRINITY_DN6203_c0_g1_i5	3651	222	XP_012497696.1	XP_012497696.1 PREDICTED: zinc finger MYM-type protein 1 isoform X2 [Propithecus coquereli]	DUF4371 superfamily	9.89e-217	Propithecus coquereli	Chordata
TRINITY_DN6203_c0_g1_i5	3651	222	XP_025847567.1	XP_025847567.1 zinc finger MYM-type protein 1 isoform X4 [Vulpes vulpes]	DUF4371 superfamily	4.33e-216	Vulpes vulpes	Chordata
TRINITY_DN6203_c0_g1_i5	3651	222	XP_041594714.1	XP_041594714.1 zinc finger MYM-type protein 1 isoform X4 [Vulpes lagopus]	DUF4371 superfamily	4.95e-216	Vulpes lagopus	Chordata
TRINITY_DN6203_c0_g1_i5	3651	222	XP_030883166.1	XP_030883166.1 zinc finger MYM-type protein 1 isoform X5 [Leptonychotes weddellii]	DUF4371 superfamily	5.11e-216	Leptonychotes weddellii	Chordata
TRINITY_DN6203_c0_g1_i5	3651	222	XP_025847566.1	XP_025847566.1 zinc finger MYM-type protein 1 isoform X3 [Vulpes vulpes]	DUF4371 superfamily	6.97e-216	Vulpes vulpes	Chordata
TRINITY_DN6203_c0_g1_i5	3651	222	XP_034875035.1	XP_034875035.1 zinc finger MYM-type protein 1 isoform X4 [Mirounga leonina]	DUF4371 superfamily	1.43e-215	Mirounga leonina	Chordata
TRINITY_DN6203_c0_g1_i5	3651	222	XP_035921199.1	XP_035921199.1 zinc finger MYM-type protein 1 isoform X5 [Halichoerus grypus]	DUF4371 superfamily	2.01e-215	Halichoerus grypus	Chordata
TRINITY_DN6203_c0_g1_i5	3651	222	XP_030883165.1	XP_030883165.1 zinc finger MYM-type protein 1 isoform X4 [Leptonychotes weddellii]	DUF4371 superfamily	6.38e-215	Leptonychotes weddellii	Chordata
TRINITY_DN6203_c0_g1_i5	3651	222	XP_014639618.1	XP_014639618.1 PREDICTED: zinc finger MYM-type protein 1 isoform X4 [Ceratotherium simum simum]	DUF4371 superfamily	7.6e-215	Ceratotherium simum simum	Chordata
TRINITY_DN6203_c0_g1_i5	3651	222	XP_034504874.1	XP_034504874.1 zinc finger MYM-type protein 1 isoform X5 [Ailuropoda melanoleuca]	DUF4371 superfamily	1.58e-214	Ailuropoda melanoleuca	Chordata
TRINITY_DN6203_c0_g1_i5	3651	222	XP_034875034.1	XP_034875034.1 zinc finger MYM-type protein 1 isoform X3 [Mirounga leonina]	DUF4371 superfamily	1.78e-214	Mirounga leonina	Chordata
TRINITY_DN6203_c0_g1_i5	3651	222	XP_041594713.1	XP_041594713.1 zinc finger MYM-type protein 1 isoform X3 [Vulpes lagopus]	DUF4371 superfamily	1.91e-214	Vulpes lagopus	Chordata
TRINITY_DN6203_c0_g1_i5	3651	222	XP_035921198.1	XP_035921198.1 zinc finger MYM-type protein 1 isoform X4 [Halichoerus grypus]	DUF4371 superfamily	2.51e-214	Halichoerus grypus	Chordata
TRINITY_DN6203_c0_g1_i5	3651	222	XP_032244119.1	XP_032244119.1 zinc finger MYM-type protein 1 isoform X5 [Phoca vitulina]	DUF4371 superfamily	3.13e-214	Phoca vitulina	Chordata
TRINITY_DN6203_c0_g1_i5	3651	222	XP_038543518.1	XP_038543518.1 zinc finger MYM-type protein 1 isoform X4 [Canis lupus familiaris]	DUF4371 superfamily	8.49e-214	Canis lupus familiaris	Chordata
TRINITY_DN6203_c0_g1_i5	3651	222	XP_013975140.1	XP_013975140.1 zinc finger MYM-type protein 1 isoform X4 [Canis lupus familiaris]	DUF4371 superfamily	8.49e-214	Canis lupus familiaris	Chordata
TRINITY_DN6203_c0_g1_i5	3651	222	XP_021539361.1	XP_021539361.1 zinc finger MYM-type protein 1-like [Neomonachus schauinslandi]	DUF4371 superfamily	8.67e-214	Neomonachus schauinslandi	Chordata
TRINITY_DN6203_c0_g1_i5	3651	222	XP_012497695.1	XP_012497695.1 PREDICTED: zinc finger MYM-type protein 1 isoform X1 [Propithecus coquereli]	DUF4371 superfamily	9.7e-214	Propithecus coquereli	Chordata
TRINITY_DN6203_c0_g1_i5	3651	222	XP_041594712.1	XP_041594712.1 zinc finger MYM-type protein 1 isoform X2 [Vulpes lagopus]	DUF4371 superfamily	1.04e-213	Vulpes lagopus	Chordata
TRINITY_DN3674_c0_g1_i2	1028	214	KAG8337733.1	KAG8337733.1 hypothetical protein J6590_015395 [Homalodisca vitripennis]	crotonase-like superfamily	1.24e-39	Homalodisca vitripennis	Arthropoda
TRINITY_DN3674_c0_g1_i2	1028	214	TSK20274.1	TSK20274.1 Enoyl-CoA hydratase domain-containing protein 2, mitochondrial [Bagarius yarrelli]	crotonase-like superfamily	3.03e-17	Bagarius yarrelli	Chordata
TRINITY_DN3674_c0_g1_i2	1028	214	XP_026856897.2	XP_026856897.2 LOW QUALITY PROTEIN: probable enoyl-CoA hydratase echA8 [Electrophorus electricus]	crotonase-like superfamily	2.18e-14	Electrophorus electricus	Chordata
TRINITY_DN3674_c0_g1_i2	1028	214	XP_039382773.1	XP_039382773.1 mevalonyl-coenzyme A hydratase sidH-like isoform X2 [Mauremys reevesii]	crotonase-like superfamily	3.33e-14	Mauremys reevesii	Chordata
TRINITY_DN3674_c0_g1_i2	1028	214	KAG7317790.1	KAG7317790.1 hypothetical protein KOW79_018825 [Hemibagrus wyckioides]	crotonase-like superfamily	4.27e-14	Hemibagrus wyckioides	Chordata
TRINITY_DN3674_c0_g1_i2	1028	214	XP_034153959.1	XP_034153959.1 2,3-dehydroadipyl-CoA hydratase [Pangasianodon hypophthalmus]	crotonase-like superfamily	5.9e-14	Pangasianodon hypophthalmus	Chordata
TRINITY_DN3674_c0_g1_i2	1028	214	XP_039382772.1	XP_039382772.1 mevalonyl-coenzyme A hydratase sidH-like isoform X1 [Mauremys reevesii]	crotonase-like superfamily	5.97e-14	Mauremys reevesii	Chordata
TRINITY_DN3674_c0_g1_i2	1028	214	XP_038244432.1	XP_038244432.1 LOW QUALITY PROTEIN: mevalonyl-coenzyme A hydratase sidH-like [Dermochelys coriacea]	crotonase-like superfamily	1.1e-13	Dermochelys coriacea	Chordata
TRINITY_DN3674_c0_g1_i2	1028	214	XP_042320345.1	XP_042320345.1 mevalonyl-coenzyme A hydratase sidH-like [Sceloporus undulatus]	crotonase-like superfamily	1.28e-13	Sceloporus undulatus	Chordata
TRINITY_DN3674_c0_g1_i2	1028	214	KAA0704994.1	KAA0704994.1 putative enoyl-CoA hydratase, mitochondrial [Triplophysa tibetana]	crotonase-like superfamily	1.51e-13	Triplophysa tibetana	Chordata
TRINITY_DN3674_c0_g1_i2	1028	214	XP_030408230.1	XP_030408230.1 uncharacterized protein LOC115646492 isoform X2 [Gopherus evgoodei]	crotonase-like superfamily	1.56e-13	Gopherus evgoodei	Chordata
TRINITY_DN3674_c0_g1_i2	1028	214	XP_024946264.1	XP_024946264.1 probable enoyl-CoA hydratase, mitochondrial isoform X2 [Cephus cinctus]	crotonase-like superfamily	2.6e-13	Cephus cinctus	Arthropoda
TRINITY_DN3674_c0_g1_i2	1028	214	XP_030408228.1	XP_030408228.1 uncharacterized protein LOC115646492 isoform X1 [Gopherus evgoodei]	crotonase-like superfamily	2.81e-13	Gopherus evgoodei	Chordata
TRINITY_DN3674_c0_g1_i2	1028	214	XP_017308333.1	XP_017308333.1 PREDICTED: 2,3-dehydroadipyl-CoA hydratase-like [Ictalurus punctatus]	crotonase-like superfamily	2.87e-13	Ictalurus punctatus	Chordata
TRINITY_DN3674_c0_g1_i2	1028	214	XP_026515904.1	XP_026515904.1 uncharacterized protein LOC112111379 [Terrapene carolina triunguis]	crotonase-like superfamily	2.87e-13	Terrapene carolina triunguis	Chordata
TRINITY_DN3674_c0_g1_i2	1028	214	XP_025035122.1	XP_025035122.1 uncharacterized protein LOC102448550 isoform X3 [Pelodiscus sinensis]	crotonase-like superfamily	3.7e-13	Pelodiscus sinensis	Chordata
TRINITY_DN3674_c0_g1_i2	1028	214	XP_006138848.1	XP_006138848.1 uncharacterized protein LOC102448550 isoform X2 [Pelodiscus sinensis]	crotonase-like superfamily	3.87e-13	Pelodiscus sinensis	Chordata
TRINITY_DN3674_c0_g1_i2	1028	214	XP_027682482.2	XP_027682482.2 mevalonyl-coenzyme A hydratase sidH [Chelonia mydas]	crotonase-like superfamily	3.96e-13	Chelonia mydas	Chordata
TRINITY_DN3674_c0_g1_i2	1028	214	XP_021939702.1	XP_021939702.1 uncharacterized protein LOC110839631 [Zootermopsis nevadensis]	crotonase-like superfamily	4.7e-13	Zootermopsis nevadensis	Arthropoda
TRINITY_DN3674_c0_g1_i2	1028	214	TFK09176.1	TFK09176.1 ubiquitin-associated domain-containing protein 1 [Platysternon megacephalum]	crotonase-like superfamily	5.22e-13	Platysternon megacephalum	Chordata
TRINITY_DN16523_c0_g1_i5	1491	210	NXX65024.1	NXX65024.1 ZB8AB protein [Spizella passerina]	COG5048	2.92e-05	Spizella passerina	Chordata
TRINITY_DN3013_c0_g1_i6	2459	208	NXH20960.1	NXH20960.1 ZN431 protein [Bucco capensis]	COG5048	1.31e-09	Bucco capensis	Chordata
TRINITY_DN3013_c0_g1_i6	2459	208	KFQ28284.1	KFQ28284.1 Zinc finger protein 383, partial [Mesitornis unicolor]	COG5048	1.53e-09	Mesitornis unicolor	Chordata
TRINITY_DN3013_c0_g1_i6	2459	208	NXT77983.1	NXT77983.1 ZN570 protein [Zapornia atra]	COG5048	2.21e-09	Zapornia atra	Chordata
TRINITY_DN3013_c0_g1_i6	2459	208	NXV72712.1	NXV72712.1 ZN468 protein [Atlantisia rogersi]	COG5048	2.25e-09	Atlantisia rogersi	Chordata
TRINITY_DN3013_c0_g1_i6	2459	208	CAA05203.1	CAA05203.1 Zfx, partial [Eublepharis macularius]	COG5048	1.96e-08	Eublepharis macularius	Chordata
TRINITY_DN3013_c0_g1_i6	2459	208	XP_030058240.1	XP_030058240.1 zinc finger X-chromosomal protein isoform X1 [Microcaecilia unicolor]	COG5048	3.05e-08	Microcaecilia unicolor	Chordata
TRINITY_DN3013_c0_g1_i6	2459	208	CAA05202.1	CAA05202.1 Zfx, partial [Eublepharis macularius]	COG5048	3.61e-08	Eublepharis macularius	Chordata
TRINITY_DN3013_c0_g1_i6	2459	208	XP_014399496.1	XP_014399496.1 PREDICTED: zinc finger X-chromosomal protein isoform X2 [Myotis brandtii]	COG5048	4.48e-08	Myotis brandtii	Chordata
TRINITY_DN3013_c0_g1_i6	2459	208	XP_005871613.1	XP_005871613.1 PREDICTED: zinc finger X-chromosomal protein isoform X1 [Myotis brandtii]	COG5048	5.41e-08	Myotis brandtii	Chordata
TRINITY_DN3013_c0_g1_i6	2459	208	EPQ11003.1	EPQ11003.1 Zinc finger X-chromosomal protein [Myotis brandtii]	COG5048	5.5e-08	Myotis brandtii	Chordata
TRINITY_DN3013_c0_g1_i6	2459	208	XP_033803990.1	XP_033803990.1 zinc finger X-chromosomal protein isoform X2 [Geotrypetes seraphini]	COG5048	6.82e-08	Geotrypetes seraphini	Chordata
TRINITY_DN3013_c0_g1_i6	2459	208	XP_033803987.1	XP_033803987.1 zinc finger X-chromosomal protein isoform X1 [Geotrypetes seraphini]	COG5048	7.07e-08	Geotrypetes seraphini	Chordata
TRINITY_DN3013_c0_g1_i6	2459	208	NXN46130.1	NXN46130.1 ZN345 protein [Rhinoptilus africanus]	COG5048	8.9e-08	Rhinoptilus africanus	Chordata
TRINITY_DN3013_c0_g1_i6	2459	208	CAA05204.1	CAA05204.1 Zfx, partial [Natrix tessellata]	COG5048	1.23e-07	Natrix tessellata	Chordata
TRINITY_DN3013_c0_g1_i6	2459	208	XP_015270929.1	XP_015270929.1 PREDICTED: zinc finger X-chromosomal protein [Gekko japonicus]	COG5048	2.13e-07	Gekko japonicus	Chordata
TRINITY_DN3013_c0_g1_i6	2459	208	NXL46163.1	NXL46163.1 ZFP3 protein [Podilymbus podiceps]	COG5048	2.18e-07	Podilymbus podiceps	Chordata
TRINITY_DN3013_c0_g1_i6	2459	208	GCF40369.1	GCF40369.1 hypothetical protein parPi_0000801 [Paroedura picta]	COG5048	2.2e-07	Paroedura picta	Chordata
TRINITY_DN3013_c0_g1_i6	2459	208	ADI56150.1	ADI56150.1 zinc finger protein Y-linked, partial [Papio anubis]	COG5048	2.87e-07	Papio anubis	Chordata
TRINITY_DN3013_c0_g1_i6	2459	208	AAF90094.1	AAF90094.1 zinc finger protein Zfy, partial [Panthera leo]	COG5048	4.13e-07	Panthera leo	Chordata
TRINITY_DN3013_c0_g1_i6	2459	208	XP_036293505.1	XP_036293505.1 zinc finger X-chromosomal protein-like [Pipistrellus kuhlii]	COG5048	4.84e-07	Pipistrellus kuhlii	Chordata
TRINITY_DN77624_c0_g1_i1	323	208	XP_027144353.1	XP_027144353.1 DNA (cytosine-5)-methyltransferase 3C-like [Larimichthys crocea]	#N/A	1.58e-08	Larimichthys crocea	Chordata
TRINITY_DN77624_c0_g1_i1	323	208	XP_031139749.1	XP_031139749.1 uncharacterized protein LOC116039113 [Sander lucioperca]	#N/A	2.57e-08	Sander lucioperca	Chordata
TRINITY_DN77624_c0_g1_i1	323	208	XP_020473479.1	XP_020473479.1 LOW QUALITY PROTEIN: uncharacterized protein LOC109970330 [Monopterus albus]	#N/A	3.5e-08	Monopterus albus	Chordata
TRINITY_DN77624_c0_g1_i1	323	208	XP_028439354.1	XP_028439354.1 uncharacterized protein LOC114559104 isoform X2 [Perca flavescens]	#N/A	3.51e-08	Perca flavescens	Chordata
TRINITY_DN77624_c0_g1_i1	323	208	XP_019961010.1	XP_019961010.1 PREDICTED: uncharacterized protein LOC109641120 isoform X2 [Paralichthys olivaceus]	#N/A	3.51e-08	Paralichthys olivaceus	Chordata
TRINITY_DN77624_c0_g1_i1	323	208	XP_019961009.1	XP_019961009.1 PREDICTED: uncharacterized protein LOC109641120 isoform X1 [Paralichthys olivaceus]	#N/A	3.51e-08	Paralichthys olivaceus	Chordata
TRINITY_DN77624_c0_g1_i1	323	208	XP_028439349.1	XP_028439349.1 uncharacterized protein LOC114559104 isoform X1 [Perca flavescens]	#N/A	3.51e-08	Perca flavescens	Chordata
TRINITY_DN77624_c0_g1_i1	323	208	XP_039657808.1	XP_039657808.1 uncharacterized protein LOC120559840 [Perca fluviatilis]	#N/A	3.51e-08	Perca fluviatilis	Chordata
TRINITY_DN77624_c0_g1_i1	323	208	ADG23069.2	ADG23069.2 DNA (cytosine-5)-methyltransferase 3b, partial [Gadus morhua]	#N/A	4.38e-08	Gadus morhua	Chordata
TRINITY_DN77624_c0_g1_i1	323	208	XP_026222634.1	XP_026222634.1 uncharacterized protein LOC113166723 isoform X3 [Anabas testudineus]	#N/A	4.78e-08	Anabas testudineus	Chordata
TRINITY_DN77624_c0_g1_i1	323	208	XP_026222633.1	XP_026222633.1 uncharacterized protein LOC113166723 isoform X2 [Anabas testudineus]	#N/A	4.79e-08	Anabas testudineus	Chordata
TRINITY_DN77624_c0_g1_i1	323	208	XP_026222632.1	XP_026222632.1 uncharacterized protein LOC113166723 isoform X1 [Anabas testudineus]	#N/A	4.79e-08	Anabas testudineus	Chordata
TRINITY_DN77624_c0_g1_i1	323	208	XP_034732553.1	XP_034732553.1 uncharacterized protein LOC117947591 [Etheostoma cragini]	#N/A	4.79e-08	Etheostoma cragini	Chordata
TRINITY_DN77624_c0_g1_i1	323	208	XP_040908571.1	XP_040908571.1 uncharacterized protein LOC121191479 [Toxotes jaculatrix]	#N/A	4.8e-08	Toxotes jaculatrix	Chordata
TRINITY_DN77624_c0_g1_i1	323	208	XP_041800928.1	XP_041800928.1 uncharacterized protein LOC121612248 [Chelmon rostratus]	#N/A	4.8e-08	Chelmon rostratus	Chordata
TRINITY_DN77624_c0_g1_i1	323	208	XP_023254223.1	XP_023254223.1 DNA (cytosine-5)-methyltransferase 3C-like, partial [Seriola lalandi dorsalis]	#N/A	4.89e-08	Seriola lalandi dorsalis	Chordata
TRINITY_DN77624_c0_g1_i1	323	208	AGE12662.1	AGE12662.1 DNA (cytosine-5-)-methyltransferase 3b, partial [Solea senegalensis]	#N/A	5.4e-08	Solea senegalensis	Chordata
TRINITY_DN77624_c0_g1_i1	323	208	XP_032817292.1	XP_032817292.1 DNA (cytosine-5)-methyltransferase 3A-like isoform X3 [Petromyzon marinus]	#N/A	6.44e-08	Petromyzon marinus	Chordata
TRINITY_DN77624_c0_g1_i1	323	208	XP_032817291.1	XP_032817291.1 DNA (cytosine-5)-methyltransferase 3A-like isoform X2 [Petromyzon marinus]	#N/A	6.44e-08	Petromyzon marinus	Chordata
TRINITY_DN77624_c0_g1_i1	323	208	XP_032817290.1	XP_032817290.1 DNA (cytosine-5)-methyltransferase 3A-like isoform X1 [Petromyzon marinus]	#N/A	6.45e-08	Petromyzon marinus	Chordata
TRINITY_DN49971_c0_g3_i1	2838	206	XP_039279735.1	XP_039279735.1 putative nuclease HARBI1 [Nilaparvata lugens]	DDE_Tnp_4 superfamily	1.53e-100	Nilaparvata lugens	Arthropoda
TRINITY_DN49971_c0_g3_i1	2838	206	XP_021326945.1	XP_021326945.1 putative nuclease HARBI1 [Danio rerio]	DDE_Tnp_4 superfamily	4.84e-69	Danio rerio	Chordata
TRINITY_DN49971_c0_g3_i1	2838	206	XP_039626518.1	XP_039626518.1 putative nuclease HARBI1 [Polypterus senegalus]	DDE_Tnp_4 superfamily	4.85e-68	Polypterus senegalus	Chordata
TRINITY_DN49971_c0_g3_i1	2838	206	XP_039610032.1	XP_039610032.1 putative nuclease HARBI1 [Polypterus senegalus]	DDE_Tnp_4 superfamily	8.07e-68	Polypterus senegalus	Chordata
TRINITY_DN49971_c0_g3_i1	2838	206	XP_039618072.1	XP_039618072.1 putative nuclease HARBI1 [Polypterus senegalus]	DDE_Tnp_4 superfamily	1.59e-67	Polypterus senegalus	Chordata
TRINITY_DN49971_c0_g3_i1	2838	206	XP_039602252.1	XP_039602252.1 putative nuclease HARBI1 [Polypterus senegalus]	DDE_Tnp_4 superfamily	3.4e-67	Polypterus senegalus	Chordata
TRINITY_DN49971_c0_g3_i1	2838	206	XP_039618096.1	XP_039618096.1 putative nuclease HARBI1 [Polypterus senegalus]	DDE_Tnp_4 superfamily	4.7e-67	Polypterus senegalus	Chordata
TRINITY_DN49971_c0_g3_i1	2838	206	MPV02312.1	MPV02312.1 transposase [Escherichia coli]	DDE_Tnp_4 superfamily	1.82e-66	Escherichia coli	Proteobacteria
TRINITY_DN49971_c0_g3_i1	2838	206	XP_039590571.1	XP_039590571.1 putative nuclease HARBI1 [Polypterus senegalus]	DDE_Tnp_4 superfamily	3.45e-66	Polypterus senegalus	Chordata
TRINITY_DN49971_c0_g3_i1	2838	206	XP_039623583.1	XP_039623583.1 putative nuclease HARBI1 [Polypterus senegalus]	DDE_Tnp_4 superfamily	4.77e-66	Polypterus senegalus	Chordata
TRINITY_DN49971_c0_g3_i1	2838	206	XP_039620777.1	XP_039620777.1 putative nuclease HARBI1 [Polypterus senegalus]	DDE_Tnp_4 superfamily	6.59e-66	Polypterus senegalus	Chordata
TRINITY_DN49971_c0_g3_i1	2838	206	XP_039618115.1	XP_039618115.1 putative nuclease HARBI1 [Polypterus senegalus]	DDE_Tnp_4 superfamily	4.37e-65	Polypterus senegalus	Chordata
TRINITY_DN49971_c0_g3_i1	2838	206	XP_039613871.1	XP_039613871.1 putative nuclease HARBI1 [Polypterus senegalus]	DDE_Tnp_4 superfamily	8.34e-65	Polypterus senegalus	Chordata
TRINITY_DN49971_c0_g3_i1	2838	206	WP_193644639.1	WP_193644639.1 transposase [Escherichia coli]	DDE_Tnp_4 superfamily	4.86e-63	Escherichia coli	Proteobacteria
TRINITY_DN49971_c0_g3_i1	2838	206	XP_041837917.1	XP_041837917.1 putative nuclease HARBI1 [Melanotaenia boesemani]	DDE_Tnp_4 superfamily	2e-62	Melanotaenia boesemani	Chordata
TRINITY_DN49971_c0_g3_i1	2838	206	XP_039598426.1	XP_039598426.1 putative nuclease HARBI1 [Polypterus senegalus]	DDE_Tnp_4 superfamily	5.73e-61	Polypterus senegalus	Chordata
TRINITY_DN49971_c0_g3_i1	2838	206	XP_039608641.1	XP_039608641.1 putative nuclease HARBI1 [Polypterus senegalus]	DDE_Tnp_4 superfamily	1.04e-56	Polypterus senegalus	Chordata
TRINITY_DN49971_c0_g3_i1	2838	206	XP_039279758.1	XP_039279758.1 putative nuclease HARBI1 isoform X2 [Nilaparvata lugens]	DDE_Tnp_4 superfamily	1.59e-54	Nilaparvata lugens	Arthropoda
TRINITY_DN49971_c0_g3_i1	2838	206	XP_039279757.1	XP_039279757.1 putative nuclease HARBI1 isoform X1 [Nilaparvata lugens]	DDE_Tnp_4 superfamily	2.99e-54	Nilaparvata lugens	Arthropoda
TRINITY_DN49971_c0_g3_i1	2838	206	KAA0719755.1	KAA0719755.1 hypothetical protein E1301_Tti022785 [Triplophysa tibetana]	DDE_Tnp_4 superfamily	5.63e-53	Triplophysa tibetana	Chordata
TRINITY_DN20992_c0_g1_i2	2968	206	XP_041842115.1	XP_041842115.1 zinc finger MYM-type protein 1-like isoform X1 [Melanotaenia boesemani]	DUF4371 superfamily	6.57e-171	Melanotaenia boesemani	Chordata
TRINITY_DN20992_c0_g1_i2	2968	206	XP_041842116.1	XP_041842116.1 zinc finger MYM-type protein 1-like isoform X2 [Melanotaenia boesemani]	DUF4371 superfamily	6.67e-166	Melanotaenia boesemani	Chordata
TRINITY_DN20992_c0_g1_i2	2968	206	GFO21201.1	GFO21201.1 hypothetical protein PoB_004770600 [Plakobranchus ocellatus]	DUF4371 superfamily	3.38e-158	Plakobranchus ocellatus	Mollusca
TRINITY_DN20992_c0_g1_i2	2968	206	XP_039518567.1	XP_039518567.1 zinc finger MYM-type protein 1-like [Pimephales promelas]	DUF4371 superfamily	6.75e-154	Pimephales promelas	Chordata
TRINITY_DN20992_c0_g1_i2	2968	206	XP_035259346.1	XP_035259346.1 zinc finger MYM-type protein 1-like [Anguilla anguilla]	DUF4371 superfamily	4.96e-152	Anguilla anguilla	Chordata
TRINITY_DN20992_c0_g1_i2	2968	206	KAG5853599.1	KAG5853599.1 hypothetical protein ANANG_G00027710 [Anguilla anguilla]	DUF4371 superfamily	4.96e-152	Anguilla anguilla	Chordata
TRINITY_DN20992_c0_g1_i2	2968	206	XP_030267316.1	XP_030267316.1 zinc finger MYM-type protein 1-like isoform X1 [Sparus aurata]	DUF4371 superfamily	9.78e-152	Sparus aurata	Chordata
TRINITY_DN20992_c0_g1_i2	2968	206	XP_019211080.1	XP_019211080.1 zinc finger MYM-type protein 1-like [Oreochromis niloticus]	DUF4371 superfamily	3.3e-151	Oreochromis niloticus	Chordata
TRINITY_DN20992_c0_g1_i2	2968	206	XP_019202908.2	XP_019202908.2 zinc finger MYM-type protein 1-like [Oreochromis niloticus]	DUF4371 superfamily	4.64e-151	Oreochromis niloticus;Astatotilapia calliptera;Maylandia zebra	Chordata
TRINITY_DN20992_c0_g1_i2	2968	206	XP_042073593.1	XP_042073593.1 zinc finger MYM-type protein 1-like [Haplochromis burtoni]	DUF4371 superfamily	4.64e-151	Haplochromis burtoni	Chordata
TRINITY_DN20992_c0_g1_i2	2968	206	XP_026024916.1	XP_026024916.1 zinc finger MYM-type protein 1-like [Astatotilapia calliptera]	DUF4371 superfamily	4.64e-151	Astatotilapia calliptera	Chordata
TRINITY_DN20992_c0_g1_i2	2968	206	XP_026027541.1	XP_026027541.1 zinc finger MYM-type protein 1-like [Astatotilapia calliptera]	DUF4371 superfamily	1.29e-150	Astatotilapia calliptera	Chordata
TRINITY_DN20992_c0_g1_i2	2968	206	XP_019217536.2	XP_019217536.2 zinc finger MYM-type protein 1-like [Oreochromis niloticus]	DUF4371 superfamily	2.09e-149	Oreochromis niloticus	Chordata
TRINITY_DN20992_c0_g1_i2	2968	206	XP_035984334.1	XP_035984334.1 zinc finger MYM-type protein 1 [Fundulus heteroclitus]	DUF4371 superfamily	2.2e-148	Fundulus heteroclitus	Chordata
TRINITY_DN20992_c0_g1_i2	2968	206	XP_015231262.1	XP_015231262.1 PREDICTED: zinc finger MYM-type protein 1-like isoform X1 [Cyprinodon variegatus]	DUF4371 superfamily	2.27e-148	Cyprinodon variegatus	Chordata
TRINITY_DN20992_c0_g1_i2	2968	206	XP_040189964.1	XP_040189964.1 zinc finger MYM-type protein 1-like [Rana temporaria]	DUF4371 superfamily	2.7e-148	Rana temporaria	Chordata
TRINITY_DN20992_c0_g1_i2	2968	206	XP_033982166.1	XP_033982166.1 zinc finger MYM-type protein 1-like [Trematomus bernacchii]	DUF4371 superfamily	7.63e-148	Trematomus bernacchii	Chordata
TRINITY_DN20992_c0_g1_i2	2968	206	XP_040192709.1	XP_040192709.1 zinc finger MYM-type protein 1-like [Rana temporaria]	DUF4371 superfamily	2.92e-147	Rana temporaria	Chordata
TRINITY_DN20992_c0_g1_i2	2968	206	XP_034077839.1	XP_034077839.1 zinc finger MYM-type protein 1 [Gymnodraco acuticeps]	DUF4371 superfamily	8.27e-147	Gymnodraco acuticeps	Chordata
TRINITY_DN20992_c0_g1_i2	2968	206	XP_039539148.1	XP_039539148.1 zinc finger MYM-type protein 1-like [Pimephales promelas]	DUF4371 superfamily	2.26e-146	Pimephales promelas	Chordata
TRINITY_DN1183_c7_g1_i6	1355	202	KAG8259730.1	KAG8259730.1 hypothetical protein J6590_008765 [Homalodisca vitripennis]	PHA02927 superfamily	3.66e-82	Homalodisca vitripennis	Arthropoda
TRINITY_DN1183_c7_g1_i6	1355	202	XP_021483671.1	XP_021483671.1 sushi, von Willebrand factor type A, EGF and pentraxin domain-containing protein 1, partial [Meriones unguiculatus]	PHA02927 superfamily	7.28e-35	Meriones unguiculatus	Chordata
TRINITY_DN1183_c7_g1_i6	1355	202	XP_021055664.1	XP_021055664.1 LOW QUALITY PROTEIN: sushi, von Willebrand factor type A, EGF and pentraxin domain-containing protein 1 [Mus pahari]	PHA02927 superfamily	2.44e-34	Mus pahari	Chordata
TRINITY_DN1183_c7_g1_i6	1355	202	EDL91661.1	EDL91661.1 rCG32007, isoform CRA_b, partial [Rattus norvegicus]	PHA02927 superfamily	2.97e-34	Rattus norvegicus	Chordata
TRINITY_DN1183_c7_g1_i6	1355	202	EDL91660.1	EDL91660.1 rCG32007, isoform CRA_a, partial [Rattus norvegicus]	PHA02927 superfamily	3.04e-34	Rattus norvegicus	Chordata
TRINITY_DN1183_c7_g1_i6	1355	202	XP_038966969.1	XP_038966969.1 sushi, von Willebrand factor type A, EGF and pentraxin domain-containing protein 1 isoform X3 [Rattus norvegicus]	PHA02927 superfamily	3.15e-34	Rattus norvegicus	Chordata
TRINITY_DN1183_c7_g1_i6	1355	202	XP_038966968.1	XP_038966968.1 sushi, von Willebrand factor type A, EGF and pentraxin domain-containing protein 1 isoform X2 [Rattus norvegicus]	PHA02927 superfamily	3.16e-34	Rattus norvegicus	Chordata
TRINITY_DN1183_c7_g1_i6	1355	202	P0C6B8.1	P0C6B8.1 RecName: Full=Sushi, von Willebrand factor type A, EGF and pentraxin domain-containing protein 1; Flags: Precursor [Rattus norvegicus]	PHA02927 superfamily	3.3e-34	Rattus norvegicus	Chordata
TRINITY_DN1183_c7_g1_i6	1355	202	XP_038966967.1	XP_038966967.1 sushi, von Willebrand factor type A, EGF and pentraxin domain-containing protein 1 isoform X1 [Rattus norvegicus]	PHA02927 superfamily	3.31e-34	Rattus norvegicus	Chordata
TRINITY_DN1183_c7_g1_i6	1355	202	EGW02022.1	EGW02022.1 Sushi, von Willebrand factor type A, EGF and pentraxin domain-containing protein 1 [Cricetulus griseus]	PHA02927 superfamily	4.35e-34	Cricetulus griseus	Chordata
TRINITY_DN1183_c7_g1_i6	1355	202	ERE83519.1	ERE83519.1 sushi, von Willebrand factor type A, EGF and pentraxin domain-containing protein 1 [Cricetulus griseus]	PHA02927 superfamily	4.42e-34	Cricetulus griseus	Chordata
TRINITY_DN1183_c7_g1_i6	1355	202	XP_038203492.1	XP_038203492.1 sushi, von Willebrand factor type A, EGF and pentraxin domain-containing protein 1 [Arvicola amphibius]	PHA02927 superfamily	4.44e-34	Arvicola amphibius	Chordata
TRINITY_DN1183_c7_g1_i6	1355	202	XP_016833336.2	XP_016833336.2 sushi, von Willebrand factor type A, EGF and pentraxin domain-containing protein 1 isoform X1 [Cricetulus griseus]	PHA02927 superfamily	4.44e-34	Cricetulus griseus	Chordata
TRINITY_DN1183_c7_g1_i6	1355	202	ERE83520.1	ERE83520.1 sushi, von Willebrand factor type A, EGF and pentraxin domain-containing protein 1 [Cricetulus griseus]	PHA02927 superfamily	4.45e-34	Cricetulus griseus	Chordata
TRINITY_DN1183_c7_g1_i6	1355	202	XP_032759556.1	XP_032759556.1 sushi, von Willebrand factor type A, EGF and pentraxin domain-containing protein 1 [Rattus rattus]	PHA02927 superfamily	5.99e-34	Rattus rattus	Chordata
TRINITY_DN1183_c7_g1_i6	1355	202	XP_021091585.1	XP_021091585.1 sushi, von Willebrand factor type A, EGF and pentraxin domain-containing protein 1 isoform X3 [Mesocricetus auratus]	PHA02927 superfamily	8.06e-34	Mesocricetus auratus	Chordata
TRINITY_DN1183_c7_g1_i6	1355	202	XP_040593874.1	XP_040593874.1 sushi, von Willebrand factor type A, EGF and pentraxin domain-containing protein 1 isoform X2 [Mesocricetus auratus]	PHA02927 superfamily	8.07e-34	Mesocricetus auratus	Chordata
TRINITY_DN1183_c7_g1_i6	1355	202	XP_005085100.1	XP_005085100.1 sushi, von Willebrand factor type A, EGF and pentraxin domain-containing protein 1 isoform X1 [Mesocricetus auratus]	PHA02927 superfamily	8.08e-34	Mesocricetus auratus	Chordata
TRINITY_DN1183_c7_g1_i6	1355	202	NXL01390.1	NXL01390.1 SVEP1 protein [Mesembrinibis cayennensis]	PHA02927 superfamily	9.86e-34	Mesembrinibis cayennensis	Chordata
TRINITY_DN1183_c7_g1_i6	1355	202	EDL02234.1	EDL02234.1 mCG12393, partial [Mus musculus]	PHA02927 superfamily	1e-33	Mus musculus	Chordata
TRINITY_DN35_c0_g1_i28	693	198	KAF1480860.1	KAF1480860.1 hypothetical protein FQV08_0000988, partial [Pygoscelis antarcticus]	Ubl_ubiquitin	4.87e-50	Pygoscelis antarcticus	Chordata
TRINITY_DN35_c0_g1_i28	693	198	EMP26515.1	EMP26515.1 Polyubiquitin-C, partial [Chelonia mydas]	Ubl_ubiquitin	4.76e-49	Chelonia mydas	Chordata
TRINITY_DN35_c0_g1_i28	693	198	NWI34932.1	NWI34932.1 UBIQP protein [Sula dactylatra]	Ubl_ubiquitin	7.89e-49	Sula dactylatra	Chordata
TRINITY_DN35_c0_g1_i28	693	198	NXK83129.1	NXK83129.1 UBIQP protein [Amazona guildingii]	Ubl_ubiquitin	8.14e-49	Amazona guildingii	Chordata
TRINITY_DN35_c0_g1_i28	693	198	NXC37402.1	NXC37402.1 UBIQP protein [Campylorhamphus procurvoides]	Ubl_ubiquitin	8.14e-49	Campylorhamphus procurvoides	Chordata
TRINITY_DN35_c0_g1_i28	693	198	XP_042369686.1	XP_042369686.1 ubiquitin, partial [Plectropomus leopardus]	Ubl_ubiquitin	8.44e-49	Plectropomus leopardus	Chordata
TRINITY_DN35_c0_g1_i28	693	198	CAF4361284.1	CAF4361284.1 unnamed protein product, partial [Adineta steineri]	Ubl_ubiquitin	8.96e-49	Adineta steineri	Rotifera
TRINITY_DN35_c0_g1_i28	693	198	WP_219618997.1	WP_219618997.1 ubiquitin family protein, partial [Bacillus cereus]	Ubl_ubiquitin	9.51e-49	Bacillus cereus	Firmicutes
TRINITY_DN35_c0_g1_i28	693	198	WP_194180703.1	WP_194180703.1 ubiquitin family protein, partial [Staphylococcus aureus]	Ubl_ubiquitin	9.81e-49	Staphylococcus aureus	Firmicutes
TRINITY_DN35_c0_g1_i28	693	198	XP_008485840.2	XP_008485840.2 ubiquitin [Diaphorina citri]	Ubl_ubiquitin	9.81e-49	Diaphorina citri;Enterobacter hormaechei	Proteobacteria;Arthropoda
TRINITY_DN35_c0_g1_i28	693	198	NXD50809.1	NXD50809.1 UBIQP protein [Corvus moneduloides]	Ubl_ubiquitin	1.02e-48	Corvus moneduloides	Chordata
TRINITY_DN35_c0_g1_i28	693	198	NWH99288.1	NWH99288.1 UBIQP protein [Tichodroma muraria]	Ubl_ubiquitin	1.02e-48	Ptilonorhynchus violaceus;Cisticola juncidis;Loxia leucoptera;Cardinalis cardinalis;Vidua macroura;Tichodroma muraria;Melanocharis versteri;Pheucticus melanocephalus;Erpornis zantholeuca;Chloropsis cyanopogon;Leptocoma aspasia	Chordata
TRINITY_DN35_c0_g1_i28	693	198	NXB19205.1	NXB19205.1 UBIQP protein [Rhagologus leucostigma]	Ubl_ubiquitin	1.02e-48	Rhagologus leucostigma	Chordata
TRINITY_DN35_c0_g1_i28	693	198	WP_195029302.1	WP_195029302.1 ubiquitin family protein, partial [Nocardia farcinica]	Ubl_ubiquitin	1.04e-48	Nocardia farcinica	Actinobacteria
TRINITY_DN35_c0_g1_i28	693	198	MBF6202459.1	MBF6202459.1 ubiquitin [Nocardia cyriacigeorgica]	Ubl_ubiquitin	1.04e-48	Nocardia cyriacigeorgica	Actinobacteria
TRINITY_DN35_c0_g1_i28	693	198	NWS24299.1	NWS24299.1 UBIQP protein [Polioptila caerulea]	Ubl_ubiquitin	1.05e-48	Polioptila caerulea;Anthoscopus minutus;Sclerurus mexicanus;Ploceus nigricollis	Chordata
TRINITY_DN35_c0_g1_i28	693	198	EDL20708.1	EDL20708.1 mCG1048340, partial [Mus musculus]	Ubl_ubiquitin	1.07e-48	Mus musculus	Chordata
TRINITY_DN35_c0_g1_i28	693	198	XP_010016007.1	XP_010016007.1 PREDICTED: ubiquitin isoform X16 [Nestor notabilis]	Ubl_ubiquitin	1.07e-48	Nestor notabilis	Chordata
TRINITY_DN35_c0_g1_i28	693	198	CAF4696042.1	CAF4696042.1 unnamed protein product, partial [Didymodactylos carnosus]	Ubl_ubiquitin	1.11e-48	Didymodactylos carnosus	Rotifera
TRINITY_DN35_c0_g1_i28	693	198	PNI17312.1	PNI17312.1 UBB isoform 8, partial [Pan troglodytes]	Ubl_ubiquitin	1.14e-48	Pan troglodytes	Chordata
TRINITY_DN92512_c0_g1_i1	1773	198	XP_026098179.1	XP_026098179.1 zinc finger BED domain-containing protein 4-like [Carassius auratus]	Dimer_Tnp_hAT	1.84e-22	Carassius auratus	Chordata
TRINITY_DN92512_c0_g1_i1	1773	198	XP_026117178.1	XP_026117178.1 zinc finger BED domain-containing protein 4-like [Carassius auratus]	Dimer_Tnp_hAT	7.37e-22	Carassius auratus	Chordata
TRINITY_DN92512_c0_g1_i1	1773	198	XP_022520893.1	XP_022520893.1 zinc finger BED domain-containing protein 4-like [Astyanax mexicanus]	Dimer_Tnp_hAT	9.21e-22	Astyanax mexicanus	Chordata
TRINITY_DN92512_c0_g1_i1	1773	198	XP_042073309.1	XP_042073309.1 zinc finger BED domain-containing protein 4-like [Haplochromis burtoni]	Dimer_Tnp_hAT	1.38e-21	Haplochromis burtoni	Chordata
TRINITY_DN92512_c0_g1_i1	1773	198	XP_042623294.1	XP_042623294.1 zinc finger BED domain-containing protein 4-like [Cyprinus carpio]	Dimer_Tnp_hAT	3.69e-21	Cyprinus carpio	Chordata
TRINITY_DN92512_c0_g1_i1	1773	198	ROL50877.1	ROL50877.1 Zinc finger BED domain-containing protein 4 [Anabarilius grahami]	Dimer_Tnp_hAT	3.77e-21	Anabarilius grahami	Chordata
TRINITY_DN92512_c0_g1_i1	1773	198	XP_026119237.1	XP_026119237.1 zinc finger BED domain-containing protein 4-like [Carassius auratus]	Dimer_Tnp_hAT	3.78e-21	Carassius auratus	Chordata
TRINITY_DN92512_c0_g1_i1	1773	198	XP_026113464.1	XP_026113464.1 zinc finger BED domain-containing protein 4-like [Carassius auratus]	Dimer_Tnp_hAT	3.78e-21	Carassius auratus	Chordata
TRINITY_DN92512_c0_g1_i1	1773	198	XP_026119748.1	XP_026119748.1 zinc finger BED domain-containing protein 4-like [Carassius auratus]	Dimer_Tnp_hAT	3.78e-21	Carassius auratus	Chordata
TRINITY_DN92512_c0_g1_i1	1773	198	XP_005103836.1	XP_005103836.1 zinc finger BED domain-containing protein 1 isoform X2 [Aplysia californica]	Dimer_Tnp_hAT	5.7e-21	Aplysia californica	Mollusca
TRINITY_DN92512_c0_g1_i1	1773	198	XP_005103835.1	XP_005103835.1 zinc finger BED domain-containing protein 1 isoform X1 [Aplysia californica]	Dimer_Tnp_hAT	6.48e-21	Aplysia californica	Mollusca
TRINITY_DN92512_c0_g1_i1	1773	198	XP_039514865.1	XP_039514865.1 zinc finger BED domain-containing protein 4-like [Pimephales promelas]	Dimer_Tnp_hAT	9.33e-21	Pimephales promelas	Chordata
TRINITY_DN92512_c0_g1_i1	1773	198	XP_037104184.1	XP_037104184.1 zinc finger BED domain-containing protein 4-like [Syngnathus acus]	Dimer_Tnp_hAT	1.18e-20	Syngnathus acus	Chordata
TRINITY_DN92512_c0_g1_i1	1773	198	XP_026125748.1	XP_026125748.1 zinc finger BED domain-containing protein 4-like [Carassius auratus]	Dimer_Tnp_hAT	1.19e-20	Carassius auratus	Chordata
TRINITY_DN92512_c0_g1_i1	1773	198	XP_018947159.2	XP_018947159.2 zinc finger BED domain-containing protein 4-like [Cyprinus carpio]	Dimer_Tnp_hAT	1.19e-20	Cyprinus carpio	Chordata
TRINITY_DN92512_c0_g1_i1	1773	198	XP_025753562.1	XP_025753562.1 zinc finger BED domain-containing protein 4-like [Oreochromis niloticus]	Dimer_Tnp_hAT	2.07e-20	Oreochromis niloticus	Chordata
TRINITY_DN92512_c0_g1_i1	1773	198	XP_005466359.2	XP_005466359.2 zinc finger BED domain-containing protein 4-like [Oreochromis niloticus]	Dimer_Tnp_hAT	2.07e-20	Oreochromis niloticus	Chordata
TRINITY_DN92512_c0_g1_i1	1773	198	XP_037115398.1	XP_037115398.1 zinc finger BED domain-containing protein 4-like [Syngnathus acus]	Dimer_Tnp_hAT	2.91e-20	Syngnathus acus	Chordata
TRINITY_DN92512_c0_g1_i1	1773	198	XP_039602103.1	XP_039602103.1 zinc finger BED domain-containing protein 4-like [Polypterus senegalus]	Dimer_Tnp_hAT	3.29e-20	Polypterus senegalus	Chordata
TRINITY_DN92512_c0_g1_i1	1773	198	XP_039624741.1	XP_039624741.1 zinc finger BED domain-containing protein 4-like [Polypterus senegalus]	Dimer_Tnp_hAT	3.34e-20	Polypterus senegalus	Chordata
TRINITY_DN3013_c0_g1_i19	2147	196	XP_033803990.1	XP_033803990.1 zinc finger X-chromosomal protein isoform X2 [Geotrypetes seraphini]	COG5048	2.03e-12	Geotrypetes seraphini	Chordata
TRINITY_DN3013_c0_g1_i19	2147	196	XP_033803987.1	XP_033803987.1 zinc finger X-chromosomal protein isoform X1 [Geotrypetes seraphini]	COG5048	2.14e-12	Geotrypetes seraphini	Chordata
TRINITY_DN3013_c0_g1_i19	2147	196	XP_036857013.1	XP_036857013.1 zinc finger X-chromosomal protein [Manis javanica]	COG5048	3.76e-12	Manis javanica	Chordata
TRINITY_DN3013_c0_g1_i19	2147	196	AAK51214.1	AAK51214.1 zinc finger protein, partial [Kogia breviceps]	COG5048	1.37e-10	Kogia sima;Kogia breviceps	Chordata
TRINITY_DN3013_c0_g1_i19	2147	196	AAF90063.1	AAF90063.1 zinc finger protein Zfx, partial [Prionailurus planiceps]	COG5048	1.53e-10	Prionailurus planiceps	Chordata
TRINITY_DN3013_c0_g1_i19	2147	196	NP_001098993.2	NP_001098993.2 zinc finger protein 711 isoform 2 [Danio rerio]	COG5048	1.72e-10	Danio rerio	Chordata
TRINITY_DN3013_c0_g1_i19	2147	196	A7Y7X5.1	A7Y7X5.1 RecName: Full=Zinc finger protein 711; AltName: Full=Vitelline envelope protein [Danio rerio]	COG5048	1.72e-10	Danio rerio	Chordata
TRINITY_DN3013_c0_g1_i19	2147	196	NP_001352539.1	NP_001352539.1 zinc finger protein 711 isoform 1 [Danio rerio]	COG5048	1.73e-10	Danio rerio	Chordata
TRINITY_DN3013_c0_g1_i19	2147	196	AAK51223.1	AAK51223.1 zinc finger protein, partial [Physeter catodon]	COG5048	1.89e-10	Physeter catodon	Chordata
TRINITY_DN3013_c0_g1_i19	2147	196	XP_026135368.1	XP_026135368.1 zinc finger protein 711-like [Carassius auratus]	COG5048	2.86e-10	Carassius auratus	Chordata
TRINITY_DN3013_c0_g1_i19	2147	196	ADI44084.1	ADI44084.1 zinc finger protein ZFX, partial [Macaca maura]	COG5048	3.1e-10	Macaca fascicularis;Macaca nemestrina;Macaca tonkeana;Macaca nigra;Macaca hecki;Macaca maura;Macaca nigrescens;Macaca ochreata	Chordata
TRINITY_DN3013_c0_g1_i19	2147	196	XP_036425290.1	XP_036425290.1 zinc finger protein 711 [Colossoma macropomum]	COG5048	3.98e-10	Colossoma macropomum	Chordata
TRINITY_DN3013_c0_g1_i19	2147	196	PNI14131.1	PNI14131.1 ZFY isoform 2 [Pan troglodytes]	COG5048	4.33e-10	Pan troglodytes	Chordata
TRINITY_DN3013_c0_g1_i19	2147	196	XP_039550095.1	XP_039550095.1 LOW QUALITY PROTEIN: zinc finger protein 711-like [Pimephales promelas]	COG5048	4.5e-10	Pimephales promelas	Chordata
TRINITY_DN3013_c0_g1_i19	2147	196	XP_016105832.1	XP_016105832.1 PREDICTED: zinc finger protein 711-like [Sinocyclocheilus grahami]	COG5048	4.98e-10	Sinocyclocheilus grahami	Chordata
TRINITY_DN3013_c0_g1_i19	2147	196	PNI14134.1	PNI14134.1 ZFY isoform 6 [Pan troglodytes]	COG5048	5.02e-10	Pan troglodytes	Chordata
TRINITY_DN3013_c0_g1_i19	2147	196	XP_016800155.1	XP_016800155.1 zinc finger Y-chromosomal protein isoform X3 [Pan troglodytes]	COG5048	5.14e-10	Pan troglodytes	Chordata
TRINITY_DN3013_c0_g1_i19	2147	196	XP_007228472.1	XP_007228472.1 zinc finger protein 711 [Astyanax mexicanus]	COG5048	5.25e-10	Astyanax mexicanus	Chordata
TRINITY_DN3013_c0_g1_i19	2147	196	XP_016800153.1	XP_016800153.1 zinc finger Y-chromosomal protein isoform X2 [Pan troglodytes]	COG5048	5.26e-10	Pan troglodytes	Chordata
TRINITY_DN3013_c0_g1_i19	2147	196	NP_001009003.1	NP_001009003.1 zinc finger Y-chromosomal protein [Pan troglodytes]	COG5048	5.37e-10	Pan troglodytes	Chordata
TRINITY_DN415_c0_g1_i4	2109	196	XP_042560150.1	XP_042560150.1 uncharacterized protein LOC122129163 [Clupea harengus]	#N/A	3.44e-125	Clupea harengus	Chordata
TRINITY_DN415_c0_g1_i4	2109	196	XP_031437903.1	XP_031437903.1 uncharacterized protein LOC116223849 [Clupea harengus]	#N/A	4.85e-125	Clupea harengus	Chordata
TRINITY_DN415_c0_g1_i4	2109	196	XP_028652735.1	XP_028652735.1 uncharacterized protein LOC114648085 [Erpetoichthys calabaricus]	#N/A	1.85e-112	Erpetoichthys calabaricus	Chordata
TRINITY_DN415_c0_g1_i4	2109	196	XP_028658548.1	XP_028658548.1 uncharacterized protein LOC114652351 [Erpetoichthys calabaricus]	#N/A	1.01e-111	Erpetoichthys calabaricus	Chordata
TRINITY_DN415_c0_g1_i4	2109	196	XP_034315538.1	XP_034315538.1 uncharacterized protein LOC117685321 [Crassostrea gigas]	#N/A	2.33e-111	Crassostrea gigas	Mollusca
TRINITY_DN415_c0_g1_i4	2109	196	CAC5361541.1	CAC5361541.1 unnamed protein product [Mytilus coruscus]	#N/A	8.45e-110	Mytilus coruscus	Mollusca
TRINITY_DN415_c0_g1_i4	2109	196	VDI01547.1	VDI01547.1 Hypothetical predicted protein [Mytilus galloprovincialis]	#N/A	1.05e-107	Mytilus galloprovincialis	Mollusca
TRINITY_DN415_c0_g1_i4	2109	196	VDI18221.1	VDI18221.1 Hypothetical predicted protein [Mytilus galloprovincialis]	#N/A	6.08e-107	Mytilus galloprovincialis	Mollusca
TRINITY_DN415_c0_g1_i4	2109	196	XP_009064521.1	XP_009064521.1 hypothetical protein LOTGIDRAFT_168383 [Lottia gigantea]	#N/A	2.95e-105	Lottia gigantea	Mollusca
TRINITY_DN415_c0_g1_i4	2109	196	CAG2252937.1	CAG2252937.1 unnamed protein product [Mytilus edulis]	#N/A	1.13e-104	Mytilus edulis	Mollusca
TRINITY_DN415_c0_g1_i4	2109	196	CAG2216544.1	CAG2216544.1 unnamed protein product [Mytilus edulis]	#N/A	1.13e-104	Mytilus edulis	Mollusca
TRINITY_DN415_c0_g1_i4	2109	196	CAG2202939.1	CAG2202939.1 unnamed protein product [Mytilus edulis]	#N/A	1.13e-104	Mytilus edulis	Mollusca
TRINITY_DN415_c0_g1_i4	2109	196	XP_036317389.1	XP_036317389.1 uncharacterized protein LOC118732366 [Rhagoletis pomonella]	#N/A	2.33e-103	Rhagoletis pomonella	Arthropoda
TRINITY_DN415_c0_g1_i4	2109	196	XP_028417032.1	XP_028417032.1 uncharacterized protein LOC114541256 [Dendronephthya gigantea]	#N/A	1.25e-102	Dendronephthya gigantea	Cnidaria
TRINITY_DN415_c0_g1_i4	2109	196	CAG2192395.1	CAG2192395.1 unnamed protein product [Mytilus edulis]	#N/A	3.96e-102	Mytilus edulis	Mollusca
TRINITY_DN415_c0_g1_i4	2109	196	RUS71879.1	RUS71879.1 hypothetical protein EGW08_020353 [Elysia chlorotica]	#N/A	3.55e-101	Elysia chlorotica	Mollusca
TRINITY_DN415_c0_g1_i4	2109	196	GFN76111.1	GFN76111.1 DNA repair protein rhp54 [Plakobranchus ocellatus]	#N/A	5.42e-100	Plakobranchus ocellatus	Mollusca
TRINITY_DN415_c0_g1_i4	2109	196	KAF0708115.1	KAF0708115.1 Uncharacterized protein FWK35_00036813, partial [Aphis craccivora]	#N/A	8.32e-100	Aphis craccivora	Arthropoda
TRINITY_DN415_c0_g1_i4	2109	196	VEN39081.1	VEN39081.1 unnamed protein product [Callosobruchus maculatus]	#N/A	4.62e-99	Callosobruchus maculatus	Arthropoda
TRINITY_DN415_c0_g1_i4	2109	196	XP_031355412.1	XP_031355412.1 uncharacterized protein LOC116179702 [Photinus pyralis]	#N/A	2.83e-95	Photinus pyralis	Arthropoda
TRINITY_DN7004_c0_g1_i1	1831	196	KAG0444196.1	KAG0444196.1 hypothetical protein HPB47_014059 [Ixodes persulcatus]	zf-H2C2_2	3.89e-05	Ixodes persulcatus	Arthropoda
TRINITY_DN12913_c0_g1_i4	2218	192	XP_039627277.1	XP_039627277.1 jerky protein homolog-like [Polypterus senegalus]	HTH_Tnp_Tc5 superfamily	1.66e-31	Polypterus senegalus	Chordata
TRINITY_DN12913_c0_g1_i4	2218	192	XP_028676127.1	XP_028676127.1 jerky protein homolog-like [Erpetoichthys calabaricus]	HTH_Tnp_Tc5 superfamily	1.27e-27	Erpetoichthys calabaricus	Chordata
TRINITY_DN12913_c0_g1_i4	2218	192	XP_028681081.1	XP_028681081.1 jerky protein homolog-like [Erpetoichthys calabaricus]	HTH_Tnp_Tc5 superfamily	1.57e-27	Erpetoichthys calabaricus	Chordata
TRINITY_DN12913_c0_g1_i4	2218	192	XP_028674343.1	XP_028674343.1 jerky protein homolog-like [Erpetoichthys calabaricus]	HTH_Tnp_Tc5 superfamily	2.83e-27	Erpetoichthys calabaricus	Chordata
TRINITY_DN12913_c0_g1_i4	2218	192	XP_028649035.1	XP_028649035.1 jerky protein homolog-like [Erpetoichthys calabaricus]	HTH_Tnp_Tc5 superfamily	3.71e-27	Erpetoichthys calabaricus	Chordata
TRINITY_DN12913_c0_g1_i4	2218	192	XP_028648386.1	XP_028648386.1 jerky protein homolog-like [Erpetoichthys calabaricus]	HTH_Tnp_Tc5 superfamily	3.75e-27	Erpetoichthys calabaricus	Chordata
TRINITY_DN12913_c0_g1_i4	2218	192	XP_028664086.1	XP_028664086.1 jerky protein homolog-like [Erpetoichthys calabaricus]	HTH_Tnp_Tc5 superfamily	3.79e-27	Erpetoichthys calabaricus	Chordata
TRINITY_DN12913_c0_g1_i4	2218	192	XP_028665263.1	XP_028665263.1 jerky protein homolog-like [Erpetoichthys calabaricus]	HTH_Tnp_Tc5 superfamily	7.56e-27	Erpetoichthys calabaricus	Chordata
TRINITY_DN12913_c0_g1_i4	2218	192	XP_039618076.1	XP_039618076.1 jerky protein homolog-like [Polypterus senegalus]	HTH_Tnp_Tc5 superfamily	9.13e-27	Polypterus senegalus	Chordata
TRINITY_DN12913_c0_g1_i4	2218	192	XP_039608836.1	XP_039608836.1 jerky protein homolog-like [Polypterus senegalus]	HTH_Tnp_Tc5 superfamily	1.18e-26	Polypterus senegalus	Chordata
TRINITY_DN12913_c0_g1_i4	2218	192	XP_028660442.1	XP_028660442.1 jerky protein homolog-like [Erpetoichthys calabaricus]	HTH_Tnp_Tc5 superfamily	1.22e-26	Erpetoichthys calabaricus	Chordata
TRINITY_DN12913_c0_g1_i4	2218	192	XP_028665335.1	XP_028665335.1 jerky protein homolog-like [Erpetoichthys calabaricus]	HTH_Tnp_Tc5 superfamily	1.22e-26	Erpetoichthys calabaricus	Chordata
TRINITY_DN12913_c0_g1_i4	2218	192	XP_028674359.1	XP_028674359.1 jerky protein homolog-like [Erpetoichthys calabaricus]	HTH_Tnp_Tc5 superfamily	1.24e-26	Erpetoichthys calabaricus	Chordata
TRINITY_DN12913_c0_g1_i4	2218	192	XP_028669261.1	XP_028669261.1 jerky protein homolog-like [Erpetoichthys calabaricus]	HTH_Tnp_Tc5 superfamily	1.72e-26	Erpetoichthys calabaricus	Chordata
TRINITY_DN12913_c0_g1_i4	2218	192	XP_028672775.1	XP_028672775.1 jerky protein homolog-like [Erpetoichthys calabaricus]	HTH_Tnp_Tc5 superfamily	2.2e-26	Erpetoichthys calabaricus	Chordata
TRINITY_DN12913_c0_g1_i4	2218	192	XP_028674275.1	XP_028674275.1 jerky protein homolog-like [Erpetoichthys calabaricus]	HTH_Tnp_Tc5 superfamily	2.94e-26	Erpetoichthys calabaricus	Chordata
TRINITY_DN12913_c0_g1_i4	2218	192	XP_039623936.1	XP_039623936.1 jerky protein homolog-like [Polypterus senegalus]	HTH_Tnp_Tc5 superfamily	4.25e-26	Polypterus senegalus	Chordata
TRINITY_DN12913_c0_g1_i4	2218	192	XP_028649015.1	XP_028649015.1 jerky protein homolog-like [Erpetoichthys calabaricus]	HTH_Tnp_Tc5 superfamily	9.94e-26	Erpetoichthys calabaricus	Chordata
TRINITY_DN12913_c0_g1_i4	2218	192	XP_039613929.1	XP_039613929.1 jerky protein homolog-like [Polypterus senegalus]	HTH_Tnp_Tc5 superfamily	2.02e-25	Polypterus senegalus	Chordata
TRINITY_DN12913_c0_g1_i4	2218	192	XP_028666359.1	XP_028666359.1 jerky protein homolog-like [Erpetoichthys calabaricus]	HTH_Tnp_Tc5 superfamily	4.65e-25	Erpetoichthys calabaricus	Chordata
TRINITY_DN6021_c0_g1_i1	2416	178	XP_034061602.1	XP_034061602.1 zinc finger MYM-type protein 1-like [Gymnodraco acuticeps]	DUF4371 superfamily	3.05e-219	Gymnodraco acuticeps	Chordata
TRINITY_DN6021_c0_g1_i1	2416	178	XP_034069746.1	XP_034069746.1 zinc finger MYM-type protein 1-like [Gymnodraco acuticeps]	DUF4371 superfamily	3.36e-218	Gymnodraco acuticeps	Chordata
TRINITY_DN6021_c0_g1_i1	2416	178	OCT96206.1	OCT96206.1 hypothetical protein XELAEV_18013881mg [Xenopus laevis]	DUF4371 superfamily	1.02e-214	Xenopus laevis	Chordata
TRINITY_DN6021_c0_g1_i1	2416	178	XP_040270037.1	XP_040270037.1 zinc finger MYM-type protein 1-like [Bufo bufo]	DUF4371 superfamily	2.41e-214	Bufo bufo	Chordata
TRINITY_DN6021_c0_g1_i1	2416	178	XP_015927061.1	XP_015927061.1 zinc finger MYM-type protein 1-like [Parasteatoda tepidariorum]	DUF4371 superfamily	2.95e-206	Parasteatoda tepidariorum	Arthropoda
TRINITY_DN6021_c0_g1_i1	2416	178	XP_034088842.1	XP_034088842.1 zinc finger MYM-type protein 1-like [Gymnodraco acuticeps]	DUF4371 superfamily	1.48e-203	Gymnodraco acuticeps	Chordata
TRINITY_DN6021_c0_g1_i1	2416	178	XP_026481391.1	XP_026481391.1 zinc finger MYM-type protein 1-like [Ctenocephalides felis]	DUF4371 superfamily	1.1e-199	Ctenocephalides felis	Arthropoda
TRINITY_DN6021_c0_g1_i1	2416	178	XP_034051657.1	XP_034051657.1 zinc finger MYM-type protein 1-like [Gymnodraco acuticeps]	DUF4371 superfamily	1.25e-196	Gymnodraco acuticeps	Chordata
TRINITY_DN6021_c0_g1_i1	2416	178	XP_038210847.1	XP_038210847.1 zinc finger MYM-type protein 1-like [Zerene cesonia]	DUF4371 superfamily	6.06e-191	Zerene cesonia	Arthropoda
TRINITY_DN6021_c0_g1_i1	2416	178	KAE9533683.1	KAE9533683.1 hypothetical protein AGLY_009032 [Aphis glycines]	DUF4371 superfamily	2.77e-188	Aphis glycines	Arthropoda
TRINITY_DN6021_c0_g1_i1	2416	178	XP_039310402.1	XP_039310402.1 zinc finger MYM-type protein 1-like [Solenopsis invicta]	DUF4371 superfamily	2.81e-184	Solenopsis invicta	Arthropoda
TRINITY_DN6021_c0_g1_i1	2416	178	XP_042308880.1	XP_042308880.1 zinc finger MYM-type protein 1-like isoform X1 [Sceloporus undulatus]	DUF4371 superfamily	6.19e-179	Sceloporus undulatus	Chordata
TRINITY_DN6021_c0_g1_i1	2416	178	KAG8275955.1	KAG8275955.1 hypothetical protein J6590_108280 [Homalodisca vitripennis]	DUF4371 superfamily	4.39e-176	Homalodisca vitripennis	Arthropoda
TRINITY_DN6021_c0_g1_i1	2416	178	KAE9534354.1	KAE9534354.1 hypothetical protein AGLY_008444 [Aphis glycines]	DUF4371 superfamily	3.33e-174	Aphis glycines	Arthropoda
TRINITY_DN6021_c0_g1_i1	2416	178	XP_013188693.1	XP_013188693.1 PREDICTED: zinc finger MYM-type protein 1-like [Amyelois transitella]	DUF4371 superfamily	8.47e-173	Amyelois transitella	Arthropoda
TRINITY_DN6021_c0_g1_i1	2416	178	XP_035433159.1	XP_035433159.1 zinc finger MYM-type protein 1-like [Spodoptera frugiperda]	DUF4371 superfamily	9.4e-172	Spodoptera frugiperda	Arthropoda
TRINITY_DN6021_c0_g1_i1	2416	178	KAG8540294.1	KAG8540294.1 hypothetical protein GDO81_019541 [Engystomops pustulosus]	DUF4371 superfamily	2.53e-164	Engystomops pustulosus	Chordata
TRINITY_DN6021_c0_g1_i1	2416	178	KAF0749919.1	KAF0749919.1 zinc finger MYM-type protein 1-like, partial [Aphis craccivora]	DUF4371 superfamily	1.05e-162	Aphis craccivora	Arthropoda
TRINITY_DN6021_c0_g1_i1	2416	178	XP_037297251.1	XP_037297251.1 zinc finger MYM-type protein 1-like [Manduca sexta]	DUF4371 superfamily	3.71e-160	Manduca sexta	Arthropoda
TRINITY_DN6021_c0_g1_i1	2416	178	XP_022180192.1	XP_022180192.1 zinc finger MYM-type protein 1-like [Myzus persicae]	DUF4371 superfamily	3.46e-159	Myzus persicae	Arthropoda
TRINITY_DN44183_c0_g1_i1	2215	176	XP_033788702.1	XP_033788702.1 zinc finger MYM-type protein 1-like [Geotrypetes seraphini]	DUF4371 superfamily	1.14e-228	Geotrypetes seraphini	Chordata
TRINITY_DN44183_c0_g1_i1	2215	176	XP_033815802.1	XP_033815802.1 zinc finger MYM-type protein 1-like [Geotrypetes seraphini]	DUF4371 superfamily	3.22e-228	Geotrypetes seraphini	Chordata
TRINITY_DN44183_c0_g1_i1	2215	176	XP_033788898.1	XP_033788898.1 zinc finger MYM-type protein 1-like [Geotrypetes seraphini]	DUF4371 superfamily	4.14e-210	Geotrypetes seraphini	Chordata
TRINITY_DN44183_c0_g1_i1	2215	176	XP_040275768.1	XP_040275768.1 zinc finger MYM-type protein 1-like [Bufo bufo]	DUF4371 superfamily	5.93e-208	Bufo bufo	Chordata
TRINITY_DN44183_c0_g1_i1	2215	176	XP_040286088.1	XP_040286088.1 LOW QUALITY PROTEIN: zinc finger MYM-type protein 1-like [Bufo bufo]	DUF4371 superfamily	1.88e-207	Bufo bufo	Chordata
TRINITY_DN44183_c0_g1_i1	2215	176	XP_040197560.1	XP_040197560.1 zinc finger MYM-type protein 1-like [Rana temporaria]	DUF4371 superfamily	3.25e-201	Rana temporaria	Chordata
TRINITY_DN44183_c0_g1_i1	2215	176	XP_033788676.1	XP_033788676.1 zinc finger MYM-type protein 1-like [Geotrypetes seraphini]	DUF4371 superfamily	1.18e-193	Geotrypetes seraphini	Chordata
TRINITY_DN44183_c0_g1_i1	2215	176	XP_040289975.1	XP_040289975.1 LOW QUALITY PROTEIN: uncharacterized protein LOC121002597 [Bufo bufo]	DUF4371 superfamily	3.13e-192	Bufo bufo	Chordata
TRINITY_DN44183_c0_g1_i1	2215	176	XP_040272864.1	XP_040272864.1 LOW QUALITY PROTEIN: zinc finger MYM-type protein 1-like [Bufo bufo]	DUF4371 superfamily	3.78e-192	Bufo bufo	Chordata
TRINITY_DN44183_c0_g1_i1	2215	176	XP_040286004.1	XP_040286004.1 zinc finger MYM-type protein 1-like [Bufo bufo]	DUF4371 superfamily	2.34e-180	Bufo bufo	Chordata
TRINITY_DN44183_c0_g1_i1	2215	176	XP_030058304.1	XP_030058304.1 zinc finger MYM-type protein 1-like [Microcaecilia unicolor]	DUF4371 superfamily	4.79e-179	Microcaecilia unicolor	Chordata
TRINITY_DN44183_c0_g1_i1	2215	176	XP_030066678.1	XP_030066678.1 zinc finger MYM-type protein 1-like [Microcaecilia unicolor]	DUF4371 superfamily	2.02e-170	Microcaecilia unicolor	Chordata
TRINITY_DN44183_c0_g1_i1	2215	176	XP_028152869.1	XP_028152869.1 LOW QUALITY PROTEIN: zinc finger MYM-type protein 1-like [Diabrotica virgifera virgifera]	DUF4371 superfamily	1.21e-166	Diabrotica virgifera virgifera	Arthropoda
TRINITY_DN44183_c0_g1_i1	2215	176	XP_033788713.1	XP_033788713.1 LOW QUALITY PROTEIN: zinc finger MYM-type protein 1-like [Geotrypetes seraphini]	DUF4371 superfamily	1.12e-165	Geotrypetes seraphini	Chordata
TRINITY_DN44183_c0_g1_i1	2215	176	XP_026747538.1	XP_026747538.1 zinc finger MYM-type protein 1-like [Trichoplusia ni]	DUF4371 superfamily	6.81e-165	Trichoplusia ni	Arthropoda
TRINITY_DN44183_c0_g1_i1	2215	176	XP_041976328.1	XP_041976328.1 zinc finger MYM-type protein 1-like [Aricia agestis]	DUF4371 superfamily	5.32e-163	Aricia agestis	Arthropoda
TRINITY_DN44183_c0_g1_i1	2215	176	XP_035445594.1	XP_035445594.1 E3 SUMO-protein ligase KIAA1586-like [Spodoptera frugiperda]	DUF4371 superfamily	1.77e-162	Spodoptera frugiperda	Arthropoda
TRINITY_DN44183_c0_g1_i1	2215	176	XP_018394739.1	XP_018394739.1 PREDICTED: LOW QUALITY PROTEIN: zinc finger MYM-type protein 1-like [Cyphomyrmex costatus]	DUF4371 superfamily	5.7e-162	Cyphomyrmex costatus	Arthropoda
TRINITY_DN44183_c0_g1_i1	2215	176	XP_026745060.1	XP_026745060.1 zinc finger MYM-type protein 1-like [Trichoplusia ni]	DUF4371 superfamily	7.62e-162	Trichoplusia ni	Arthropoda
TRINITY_DN44183_c0_g1_i1	2215	176	XP_013189863.1	XP_013189863.1 PREDICTED: zinc finger MYM-type protein 1-like [Amyelois transitella]	DUF4371 superfamily	1.35e-161	Amyelois transitella	Arthropoda
TRINITY_DN49601_c0_g1_i1	979	172	XP_028659020.1	XP_028659020.1 jerky protein homolog-like [Erpetoichthys calabaricus]	rve superfamily	1e-163	Erpetoichthys calabaricus	Chordata
TRINITY_DN49601_c0_g1_i1	979	172	XP_028660410.1	XP_028660410.1 jerky protein homolog-like [Erpetoichthys calabaricus]	rve superfamily	5.52e-163	Erpetoichthys calabaricus	Chordata
TRINITY_DN49601_c0_g1_i1	979	172	XP_008103963.1	XP_008103963.1 PREDICTED: jerky protein homolog-like isoform X2 [Anolis carolinensis]	rve superfamily	1.81e-158	Anolis carolinensis	Chordata
TRINITY_DN49601_c0_g1_i1	979	172	XP_016847311.1	XP_016847311.1 PREDICTED: jerky protein homolog-like isoform X1 [Anolis carolinensis]	rve superfamily	2.53e-158	Anolis carolinensis	Chordata
TRINITY_DN49601_c0_g1_i1	979	172	XP_008119844.1	XP_008119844.1 PREDICTED: jerky protein homolog-like [Anolis carolinensis]	rve superfamily	1.3e-155	Anolis carolinensis	Chordata
TRINITY_DN49601_c0_g1_i1	979	172	XP_016846335.1	XP_016846335.1 PREDICTED: uncharacterized protein LOC103277513 [Anolis carolinensis]	rve superfamily	5.23e-149	Anolis carolinensis	Chordata
TRINITY_DN49601_c0_g1_i1	979	172	XP_008119843.1	XP_008119843.1 PREDICTED: zinc finger protein with KRAB and SCAN domains 7 [Anolis carolinensis]	rve superfamily	5.19e-148	Anolis carolinensis	Chordata
TRINITY_DN49601_c0_g1_i1	979	172	XP_042315488.1	XP_042315488.1 jerky protein homolog-like [Sceloporus undulatus]	rve superfamily	4.54e-143	Sceloporus undulatus	Chordata
TRINITY_DN49601_c0_g1_i1	979	172	XP_042295721.1	XP_042295721.1 jerky protein homolog-like [Sceloporus undulatus]	rve superfamily	5.3e-127	Sceloporus undulatus	Chordata
TRINITY_DN49601_c0_g1_i1	979	172	XP_023231971.1	XP_023231971.1 jerky protein homolog-like [Centruroides sculpturatus]	rve superfamily	6.16e-120	Centruroides sculpturatus	Arthropoda
TRINITY_DN49601_c0_g1_i1	979	172	XP_029173702.1	XP_029173702.1 jerky protein homolog-like [Nylanderia fulva]	rve superfamily	8.7e-113	Nylanderia fulva	Arthropoda
TRINITY_DN49601_c0_g1_i1	979	172	KAF7249719.1	KAF7249719.1 Plexin-D1 [Varanus komodoensis]	rve superfamily	3.13e-112	Varanus komodoensis	Chordata
TRINITY_DN49601_c0_g1_i1	979	172	XP_006130857.1	XP_006130857.1 jerky protein homolog-like [Pelodiscus sinensis]	rve superfamily	4.31e-108	Pelodiscus sinensis	Chordata
TRINITY_DN49601_c0_g1_i1	979	172	XP_011861520.1	XP_011861520.1 PREDICTED: jerky protein homolog-like isoform X1 [Vollenhovia emeryi]	rve superfamily	3.48e-107	Vollenhovia emeryi	Arthropoda
TRINITY_DN49601_c0_g1_i1	979	172	GFS84640.1	GFS84640.1 jerky protein homolog-like [Trichonephila clavipes]	rve superfamily	4.84e-105	Trichonephila clavipes	Arthropoda
TRINITY_DN49601_c0_g1_i1	979	172	GFT00658.1	GFT00658.1 jerky protein homolog-like [Trichonephila clavipes]	rve superfamily	1.29e-104	Trichonephila clavipes	Arthropoda
TRINITY_DN49601_c0_g1_i1	979	172	GFW28295.1	GFW28295.1 jerky protein homolog-like [Trichonephila clavipes]	rve superfamily	1.29e-104	Trichonephila clavipes	Arthropoda
TRINITY_DN49601_c0_g1_i1	979	172	GFU88659.1	GFU88659.1 jerky protein homolog-like [Trichonephila clavipes]	rve superfamily	5.31e-104	Trichonephila clavipes	Arthropoda
TRINITY_DN49601_c0_g1_i1	979	172	GFW31611.1	GFW31611.1 jerky protein homolog-like [Trichonephila clavipes]	rve superfamily	5.8e-104	Trichonephila clavipes	Arthropoda
TRINITY_DN49601_c0_g1_i1	979	172	XP_028666359.1	XP_028666359.1 jerky protein homolog-like [Erpetoichthys calabaricus]	rve superfamily	1.75e-103	Erpetoichthys calabaricus	Chordata
TRINITY_DN7538_c0_g1_i1	757	160	XP_022910985.1	XP_022910985.1 heat shock protein 67B2-like [Onthophagus taurus]	RHOD superfamily	1.74e-17	Onthophagus taurus	Arthropoda
TRINITY_DN7538_c0_g1_i1	757	160	XP_006626376.1	XP_006626376.1 PREDICTED: thiosulfate sulfurtransferase/rhodanese-like domain-containing protein 3 [Lepisosteus oculatus]	RHOD superfamily	8.62e-17	Lepisosteus oculatus	Chordata
TRINITY_DN7538_c0_g1_i1	757	160	XP_008321859.1	XP_008321859.1 thiosulfate sulfurtransferase/rhodanese-like domain-containing protein 3 [Cynoglossus semilaevis]	RHOD superfamily	2.61e-16	Cynoglossus semilaevis	Chordata
TRINITY_DN7538_c0_g1_i1	757	160	XP_016372250.1	XP_016372250.1 PREDICTED: thiosulfate sulfurtransferase/rhodanese-like domain-containing protein 3 isoform X2 [Sinocyclocheilus rhinocerous]	RHOD superfamily	2.73e-16	Sinocyclocheilus rhinocerous	Chordata
TRINITY_DN7538_c0_g1_i1	757	160	XP_016372249.1	XP_016372249.1 PREDICTED: thiosulfate sulfurtransferase/rhodanese-like domain-containing protein 3 isoform X1 [Sinocyclocheilus rhinocerous]	RHOD superfamily	2.86e-16	Sinocyclocheilus rhinocerous	Chordata
TRINITY_DN7538_c0_g1_i1	757	160	XP_018974982.1	XP_018974982.1 thiosulfate sulfurtransferase/rhodanese-like domain-containing protein 3 [Cyprinus carpio]	RHOD superfamily	4.18e-16	Cyprinus carpio	Chordata
TRINITY_DN7538_c0_g1_i1	757	160	XP_016090284.1	XP_016090284.1 PREDICTED: thiosulfate sulfurtransferase/rhodanese-like domain-containing protein 3 isoform X2 [Sinocyclocheilus grahami]	RHOD superfamily	5.32e-16	Sinocyclocheilus grahami	Chordata
TRINITY_DN7538_c0_g1_i1	757	160	XP_016090283.1	XP_016090283.1 PREDICTED: thiosulfate sulfurtransferase/rhodanese-like domain-containing protein 3 isoform X1 [Sinocyclocheilus grahami]	RHOD superfamily	5.83e-16	Sinocyclocheilus grahami	Chordata
TRINITY_DN7538_c0_g1_i1	757	160	XP_026120744.1	XP_026120744.1 thiosulfate sulfurtransferase/rhodanese-like domain-containing protein 3 [Carassius auratus]	RHOD superfamily	8.13e-16	Carassius auratus	Chordata
TRINITY_DN7538_c0_g1_i1	757	160	XP_026106766.1	XP_026106766.1 thiosulfate sulfurtransferase/rhodanese-like domain-containing protein 3 [Carassius auratus]	RHOD superfamily	8.13e-16	Carassius auratus	Chordata
TRINITY_DN7538_c0_g1_i1	757	160	XP_015804738.1	XP_015804738.1 PREDICTED: thiosulfate sulfurtransferase/rhodanese-like domain-containing protein 3 [Nothobranchius furzeri]	RHOD superfamily	1.32e-15	Nothobranchius furzeri	Chordata
TRINITY_DN7538_c0_g1_i1	757	160	KAB0348401.1	KAB0348401.1 hypothetical protein FD754_013258 [Muntiacus muntjak]	RHOD superfamily	3.7e-15	Muntiacus muntjak	Chordata
TRINITY_DN7538_c0_g1_i1	757	160	KAG8299751.1	KAG8299751.1 Thiosulfate sulfurtransferase/rhodanese-like domain-containing protein 3 [Homalodisca vitripennis]	RHOD superfamily	3.84e-15	Homalodisca vitripennis	Arthropoda
TRINITY_DN7538_c0_g1_i1	757	160	XP_038126173.1	XP_038126173.1 thiosulfate sulfurtransferase/rhodanese-like domain-containing protein 3 [Cyprinodon tularosa]	RHOD superfamily	4.78e-15	Cyprinodon tularosa	Chordata
TRINITY_DN7538_c0_g1_i1	757	160	KAA0703455.1	KAA0703455.1 Thiosulfate sulfurtransferase/rhodanese-like domain-containing protein 3 [Triplophysa tibetana]	RHOD superfamily	5.86e-15	Triplophysa tibetana	Chordata
TRINITY_DN7538_c0_g1_i1	757	160	ROJ29271.1	ROJ29271.1 Thiosulfate sulfurtransferase/rhodanese-like domain-containing protein 3 [Anabarilius grahami]	RHOD superfamily	5.99e-15	Anabarilius grahami	Chordata
TRINITY_DN7538_c0_g1_i1	757	160	KAG8226820.1	KAG8226820.1 hypothetical protein J437_LFUL007111 [Ladona fulva]	RHOD superfamily	9.31e-15	Ladona fulva	Arthropoda
TRINITY_DN7538_c0_g1_i1	757	160	XP_019711825.1	XP_019711825.1 PREDICTED: thiosulfate sulfurtransferase/rhodanese-like domain-containing protein 3 [Hippocampus comes]	RHOD superfamily	9.53e-15	Hippocampus comes	Chordata
TRINITY_DN7538_c0_g1_i1	757	160	XP_037641510.1	XP_037641510.1 thiosulfate sulfurtransferase/rhodanese-like domain-containing protein 3 [Sebastes umbrosus]	RHOD superfamily	9.74e-15	Sebastes umbrosus	Chordata
TRINITY_DN7538_c0_g1_i1	757	160	KAB0373050.1	KAB0373050.1 hypothetical protein FD755_014709 [Muntiacus reevesi]	RHOD superfamily	1.01e-14	Muntiacus reevesi	Chordata
TRINITY_DN1196_c1_g2_i3	694	160	EAT41960.1	EAT41960.1 AAEL006456-PA [Aedes aegypti]	CLECT	7.04e-17	Aedes aegypti	Arthropoda
TRINITY_DN1196_c1_g2_i3	694	160	XP_039376232.1	XP_039376232.1 C-type lectin lectoxin-Thr1-like isoform X2 [Mauremys reevesii]	CLECT	2.59e-15	Mauremys reevesii	Chordata
TRINITY_DN1196_c1_g2_i3	694	160	XP_039376231.1	XP_039376231.1 C-type lectin lectoxin-Thr1-like isoform X1 [Mauremys reevesii]	CLECT	3.75e-15	Mauremys reevesii	Chordata
TRINITY_DN1196_c1_g2_i3	694	160	KAF7686719.1	KAF7686719.1 hypothetical protein HF521_015112 [Silurus meridionalis]	CLECT	4.71e-15	Silurus meridionalis	Chordata
TRINITY_DN1196_c1_g2_i3	694	160	XP_030395797.1	XP_030395797.1 lithostathine-1-like isoform X2 [Gopherus evgoodei]	CLECT	5.07e-15	Gopherus evgoodei	Chordata
TRINITY_DN1196_c1_g2_i3	694	160	XP_033027050.1	XP_033027050.1 C-type lectin-like [Lacerta agilis]	CLECT	6.72e-15	Lacerta agilis	Chordata
TRINITY_DN1196_c1_g2_i3	694	160	XP_021694348.1	XP_021694348.1 hepatic lectin-like [Aedes aegypti]	CLECT	1.35e-14	Aedes aegypti	Arthropoda
TRINITY_DN1196_c1_g2_i3	694	160	ADK39269.1	ADK39269.1 lectoxin-Oapo1, partial [Pseudopus apodus]	CLECT	1.6e-14	Pseudopus apodus	Chordata
TRINITY_DN1196_c1_g2_i3	694	160	XP_035695739.1	XP_035695739.1 collectin-10-like [Branchiostoma floridae]	CLECT	1.99e-14	Branchiostoma floridae	Chordata
TRINITY_DN1196_c1_g2_i3	694	160	XP_005314786.1	XP_005314786.1 lithostathine-1-like [Chrysemys picta bellii]	CLECT	2.1e-14	Chrysemys picta bellii	Chordata
TRINITY_DN1196_c1_g2_i3	694	160	NP_001123743.1	NP_001123743.1 uncharacterized protein LOC100170489 precursor [Xenopus tropicalis]	CLECT	2.57e-14	Xenopus tropicalis	Chordata
TRINITY_DN1196_c1_g2_i3	694	160	XP_034993078.1	XP_034993078.1 C-type lectin-like isoform X2 [Zootoca vivipara]	CLECT	3.24e-14	Zootoca vivipara	Chordata
TRINITY_DN1196_c1_g2_i3	694	160	XP_028559384.1	XP_028559384.1 C-type lectin-like [Podarcis muralis]	CLECT	5.02e-14	Podarcis muralis	Chordata
TRINITY_DN1196_c1_g2_i3	694	160	XP_033026363.1	XP_033026363.1 C-type lectin BpLec-like [Lacerta agilis]	CLECT	6.85e-14	Lacerta agilis	Chordata
TRINITY_DN1196_c1_g2_i3	694	160	XP_034993076.1	XP_034993076.1 C-type lectin-like isoform X1 [Zootoca vivipara]	CLECT	7.01e-14	Zootoca vivipara	Chordata
TRINITY_DN1196_c1_g2_i3	694	160	XP_004916045.2	XP_004916045.2 regenerating islet-derived protein 4 [Xenopus tropicalis]	CLECT	7.17e-14	Xenopus tropicalis	Chordata
TRINITY_DN1196_c1_g2_i3	694	160	XP_034267486.1	XP_034267486.1 C-type lectin Cal-like [Pantherophis guttatus]	CLECT	9.79e-14	Pantherophis guttatus	Chordata
TRINITY_DN1196_c1_g2_i3	694	160	XP_020668404.1	XP_020668404.1 C-type lectin-like [Pogona vitticeps]	CLECT	9.79e-14	Pogona vitticeps	Chordata
TRINITY_DN1196_c1_g2_i3	694	160	XP_030643635.1	XP_030643635.1 CD209 antigen-like protein C [Chanos chanos]	CLECT	1.18e-13	Chanos chanos	Chordata
TRINITY_DN1196_c1_g2_i3	694	160	XP_041357487.1	XP_041357487.1 uncharacterized protein LOC121374451 [Gigantopelta aegis]	CLECT	1.64e-13	Gigantopelta aegis	Mollusca
TRINITY_DN13593_c0_g1_i1	2939	158	CAC5386990.1	CAC5386990.1 KRAB [Mytilus coruscus]	zf-C2H2_8 superfamily	7.82e-08	Mytilus coruscus	Mollusca
TRINITY_DN13593_c0_g1_i1	2939	158	CAG2257261.1	CAG2257261.1 KRAB [Mytilus edulis]	zf-C2H2_8 superfamily	8.5e-08	Mytilus edulis	Mollusca
TRINITY_DN13593_c0_g1_i1	2939	158	XP_039449971.1	XP_039449971.1 zinc finger protein 799-like [Culex pipiens pallens]	zf-C2H2_8 superfamily	6.33e-07	Culex pipiens pallens	Arthropoda
TRINITY_DN13593_c0_g1_i1	2939	158	CAG2229355.1	CAG2229355.1 KRAB [Mytilus edulis]	zf-C2H2_8 superfamily	1.56e-06	Mytilus edulis	Mollusca
TRINITY_DN13593_c0_g1_i1	2939	158	XP_035716738.1	XP_035716738.1 zinc finger protein 2 homolog isoform X2 [Folsomia candida]	zf-C2H2_8 superfamily	1.82e-06	Folsomia candida	Arthropoda
TRINITY_DN13593_c0_g1_i1	2939	158	XP_021965833.1	XP_021965833.1 zinc finger protein 2 homolog isoform X1 [Folsomia candida]	zf-C2H2_8 superfamily	1.82e-06	Folsomia candida	Arthropoda
TRINITY_DN13593_c0_g1_i1	2939	158	XP_022911123.1	XP_022911123.1 oocyte zinc finger protein XlCOF6.1-like isoform X2 [Onthophagus taurus]	zf-C2H2_8 superfamily	2.13e-06	Onthophagus taurus	Arthropoda
TRINITY_DN13593_c0_g1_i1	2939	158	XP_022911122.1	XP_022911122.1 oocyte zinc finger protein XlCOF6.1-like isoform X1 [Onthophagus taurus]	zf-C2H2_8 superfamily	2.14e-06	Onthophagus taurus	Arthropoda
TRINITY_DN13593_c0_g1_i1	2939	158	XP_001868218.2	XP_001868218.2 zinc finger protein 271 [Culex quinquefasciatus]	zf-C2H2_8 superfamily	3.06e-06	Culex quinquefasciatus	Arthropoda
TRINITY_DN13593_c0_g1_i1	2939	158	XP_018294322.1	XP_018294322.1 C2H2-type zinc finger transcription factor, partial [Phycomyces blakesleeanus NRRL 1555(-)]	zf-C2H2_8 superfamily	3.5e-06	Phycomyces blakesleeanus NRRL 1555(-)	Mucoromycota
TRINITY_DN13593_c0_g1_i1	2939	158	EAT32355.1	EAT32355.1 AAEL015504-PA [Aedes aegypti]	zf-C2H2_8 superfamily	5.15e-06	Aedes aegypti	Arthropoda
TRINITY_DN13593_c0_g1_i1	2939	158	XP_039437588.1	XP_039437588.1 transcriptional repressor CTCF-like [Culex pipiens pallens]	zf-C2H2_8 superfamily	5.28e-06	Culex pipiens pallens	Arthropoda
TRINITY_DN13593_c0_g1_i1	2939	158	KAG2209454.1	KAG2209454.1 hypothetical protein INT47_008297 [Mucor saturninus]	zf-C2H2_8 superfamily	5.31e-06	Mucor saturninus	Mucoromycota
TRINITY_DN13593_c0_g1_i1	2939	158	RCH86916.1	RCH86916.1 hypothetical protein CU098_005267 [Rhizopus stolonifer]	zf-C2H2_8 superfamily	6.54e-06	Rhizopus stolonifer	Mucoromycota
TRINITY_DN13593_c0_g1_i1	2939	158	EDS26344.1	EDS26344.1 zinc finger protein 358 [Culex quinquefasciatus]	zf-C2H2_8 superfamily	6.95e-06	Culex quinquefasciatus	Arthropoda
TRINITY_DN13593_c0_g1_i1	2939	158	XP_029649790.1	XP_029649790.1 uncharacterized protein LOC115223414 [Octopus sinensis]	zf-C2H2_8 superfamily	7.15e-06	Octopus sinensis	Mollusca
TRINITY_DN13593_c0_g1_i1	2939	158	EZA53470.1	EZA53470.1 hypothetical protein X777_06551 [Ooceraea biroi]	zf-C2H2_8 superfamily	7.94e-06	Ooceraea biroi	Arthropoda
TRINITY_DN13593_c0_g1_i1	2939	158	OAD01422.1	OAD01422.1 C2H2-type zinc finger transcription factor, partial [Mucor lusitanicus CBS 277.49]	zf-C2H2_8 superfamily	8.08e-06	Mucor lusitanicus CBS 277.49	Mucoromycota
TRINITY_DN13593_c0_g1_i1	2939	158	KAG0324633.1	KAG0324633.1 hypothetical protein BG000_002141, partial [Podila horticola]	zf-C2H2_8 superfamily	9.89e-06	Podila horticola	Mucoromycota
TRINITY_DN13593_c0_g1_i1	2939	158	KHN88150.1	KHN88150.1 Zinc finger protein Xfin [Toxocara canis]	zf-C2H2_8 superfamily	1.9e-05	Toxocara canis	Nematoda
TRINITY_DN12186_c0_g1_i4	2473	156	XP_026074775.1	XP_026074775.1 zinc finger BED domain-containing protein 5-like [Carassius auratus]	#N/A	1.29e-125	Carassius auratus	Chordata
TRINITY_DN12186_c0_g1_i4	2473	156	XP_017210640.2	XP_017210640.2 LOW QUALITY PROTEIN: zinc finger BED domain-containing protein 5-like [Danio rerio]	#N/A	5.19e-125	Danio rerio	Chordata
TRINITY_DN12186_c0_g1_i4	2473	156	XP_026126532.1	XP_026126532.1 zinc finger BED domain-containing protein 5-like [Carassius auratus]	#N/A	5.54e-124	Carassius auratus	Chordata
TRINITY_DN12186_c0_g1_i4	2473	156	XP_016420243.1	XP_016420243.1 PREDICTED: LOW QUALITY PROTEIN: zinc finger BED domain-containing protein 5-like [Sinocyclocheilus rhinocerous]	#N/A	3.9e-123	Sinocyclocheilus rhinocerous	Chordata
TRINITY_DN12186_c0_g1_i4	2473	156	XP_014339944.1	XP_014339944.1 PREDICTED: LOW QUALITY PROTEIN: zinc finger BED domain-containing protein 5-like [Latimeria chalumnae]	#N/A	1.49e-122	Latimeria chalumnae	Chordata
TRINITY_DN12186_c0_g1_i4	2473	156	XP_026093452.1	XP_026093452.1 zinc finger BED domain-containing protein 5-like [Carassius auratus]	#N/A	2.1e-122	Carassius auratus	Chordata
TRINITY_DN12186_c0_g1_i4	2473	156	XP_026128810.1	XP_026128810.1 zinc finger BED domain-containing protein 5-like [Carassius auratus]	#N/A	2.86e-120	Carassius auratus	Chordata
TRINITY_DN12186_c0_g1_i4	2473	156	XP_028314934.1	XP_028314934.1 zinc finger BED domain-containing protein 5 [Gouania willdenowi]	#N/A	7.26e-120	Gouania willdenowi	Chordata
TRINITY_DN12186_c0_g1_i4	2473	156	XP_042071388.1	XP_042071388.1 zinc finger BED domain-containing protein 5-like [Haplochromis burtoni]	#N/A	7.73e-120	Haplochromis burtoni	Chordata
TRINITY_DN12186_c0_g1_i4	2473	156	XP_028665327.1	XP_028665327.1 zinc finger BED domain-containing protein 5-like [Erpetoichthys calabaricus]	#N/A	1.12e-119	Erpetoichthys calabaricus	Chordata
TRINITY_DN12186_c0_g1_i4	2473	156	XP_006005906.1	XP_006005906.1 PREDICTED: zinc finger BED domain-containing protein 5-like [Latimeria chalumnae]	#N/A	1.4e-119	Latimeria chalumnae	Chordata
TRINITY_DN12186_c0_g1_i4	2473	156	XP_025761507.1	XP_025761507.1 zinc finger BED domain-containing protein 5-like [Oreochromis niloticus]	#N/A	2.08e-119	Oreochromis niloticus	Chordata
TRINITY_DN12186_c0_g1_i4	2473	156	XP_042073490.1	XP_042073490.1 zinc finger BED domain-containing protein 5-like [Haplochromis burtoni]	#N/A	3.82e-118	Haplochromis burtoni	Chordata
TRINITY_DN12186_c0_g1_i4	2473	156	XP_031330321.1	XP_031330321.1 zinc finger BED domain-containing protein 5-like [Photinus pyralis]	#N/A	1.83e-117	Photinus pyralis	Arthropoda
TRINITY_DN12186_c0_g1_i4	2473	156	XP_028179098.1	XP_028179098.1 zinc finger BED domain-containing protein 5-like [Ostrinia furnacalis]	#N/A	2.26e-116	Ostrinia furnacalis	Arthropoda
TRINITY_DN12186_c0_g1_i4	2473	156	QQP50210.1	QQP50210.1 Uncharacterized protein FKW44_011137 [Caligus rogercresseyi]	#N/A	4.49e-115	Caligus rogercresseyi	Arthropoda
TRINITY_DN12186_c0_g1_i4	2473	156	XP_041983257.1	XP_041983257.1 zinc finger BED domain-containing protein 5-like [Aricia agestis]	#N/A	1.33e-114	Aricia agestis	Arthropoda
TRINITY_DN12186_c0_g1_i4	2473	156	KAF0710940.1	KAF0710940.1 zinc finger BED domain-containing protein 5-like [Aphis craccivora]	#N/A	1.97e-114	Aphis craccivora	Arthropoda
TRINITY_DN12186_c0_g1_i4	2473	156	XP_023251225.1	XP_023251225.1 zinc finger BED domain-containing protein 5-like [Seriola lalandi dorsalis]	#N/A	7.95e-113	Seriola lalandi dorsalis	Chordata
TRINITY_DN12186_c0_g1_i4	2473	156	XP_022176910.1	XP_022176910.1 zinc finger BED domain-containing protein 5-like [Myzus persicae]	#N/A	1.28e-111	Myzus persicae	Arthropoda
TRINITY_DN2671_c2_g1_i7	1357	154	PIO22383.1	PIO22383.1 hypothetical protein AB205_0079520 [Lithobates catesbeianus]	CD_CSD superfamily	6.51e-19	Lithobates catesbeianus	Chordata
TRINITY_DN2671_c2_g1_i7	1357	154	KAG8312351.1	KAG8312351.1 Chromobox protein 1 [Homalodisca vitripennis]	CD_CSD superfamily	1.37e-18	Homalodisca vitripennis	Arthropoda
TRINITY_DN2671_c2_g1_i7	1357	154	ACO51911.1	ACO51911.1 Chromobox protein homolog 3 [Lithobates catesbeianus]	CD_CSD superfamily	1.46e-18	Lithobates catesbeianus	Chordata
TRINITY_DN2671_c2_g1_i7	1357	154	XP_040208829.1	XP_040208829.1 chromobox protein homolog 3 isoform X3 [Rana temporaria]	CD_CSD superfamily	1.46e-18	Rana temporaria	Chordata
TRINITY_DN2671_c2_g1_i7	1357	154	XP_040208828.1	XP_040208828.1 chromobox protein homolog 3 isoform X2 [Rana temporaria]	CD_CSD superfamily	1.82e-18	Rana temporaria	Chordata
TRINITY_DN2671_c2_g1_i7	1357	154	XP_040208826.1	XP_040208826.1 chromobox protein homolog 3 isoform X1 [Rana temporaria]	CD_CSD superfamily	1.87e-18	Rana temporaria	Chordata
TRINITY_DN2671_c2_g1_i7	1357	154	KAG8573109.1	KAG8573109.1 hypothetical protein GDO81_012295 [Engystomops pustulosus]	CD_CSD superfamily	2e-18	Engystomops pustulosus	Chordata
TRINITY_DN2671_c2_g1_i7	1357	154	XP_026998119.1	XP_026998119.1 chromobox protein homolog 3-like [Tachysurus fulvidraco]	CD_CSD superfamily	2e-18	Tachysurus fulvidraco	Chordata
TRINITY_DN2671_c2_g1_i7	1357	154	NWI44383.1	NWI44383.1 CBX3 protein [Picathartes gymnocephalus]	CD_CSD superfamily	2.11e-18	Picathartes gymnocephalus	Chordata
TRINITY_DN2671_c2_g1_i7	1357	154	NXP38664.1	NXP38664.1 CBX3 protein [Leiothrix lutea]	CD_CSD superfamily	2.11e-18	Leiothrix lutea	Chordata
TRINITY_DN2671_c2_g1_i7	1357	154	KAG8573107.1	KAG8573107.1 hypothetical protein GDO81_012295 [Engystomops pustulosus]	CD_CSD superfamily	2.5e-18	Engystomops pustulosus	Chordata
TRINITY_DN2671_c2_g1_i7	1357	154	AAC60299.1	AAC60299.1 heterochromatin protein 1 gamma, partial [Xenopus laevis]	CD_CSD superfamily	2.55e-18	Xenopus laevis	Chordata
TRINITY_DN2671_c2_g1_i7	1357	154	NP_001080767.1	NP_001080767.1 chromobox 3 S homeolog [Xenopus laevis]	CD_CSD superfamily	2.75e-18	Xenopus laevis	Chordata
TRINITY_DN2671_c2_g1_i7	1357	154	XP_009062488.1	XP_009062488.1 hypothetical protein LOTGIDRAFT_128315, partial [Lottia gigantea]	CD_CSD superfamily	2.91e-18	Lottia gigantea	Mollusca
TRINITY_DN2671_c2_g1_i7	1357	154	XP_041739822.1	XP_041739822.1 chromobox protein homolog 3-like isoform X2 [Coregonus clupeaformis]	CD_CSD superfamily	2.97e-18	Coregonus clupeaformis	Chordata
TRINITY_DN2671_c2_g1_i7	1357	154	KAG8573106.1	KAG8573106.1 hypothetical protein GDO81_012295 [Engystomops pustulosus]	CD_CSD superfamily	3.67e-18	Engystomops pustulosus	Chordata
TRINITY_DN2671_c2_g1_i7	1357	154	XP_020849049.1	XP_020849049.1 chromobox protein homolog 3 isoform X2 [Phascolarctos cinereus]	CD_CSD superfamily	3.69e-18	Phascolarctos cinereus	Chordata
TRINITY_DN2671_c2_g1_i7	1357	154	XP_018979501.1	XP_018979501.1 chromobox protein homolog 3-like isoform X2 [Cyprinus carpio]	CD_CSD superfamily	3.78e-18	Cyprinus carpio	Chordata
TRINITY_DN2671_c2_g1_i7	1357	154	KAF4100561.1	KAF4100561.1 hypothetical protein G5714_018757 [Onychostoma macrolepis]	CD_CSD superfamily	3.78e-18	Onychostoma macrolepis	Chordata
TRINITY_DN2671_c2_g1_i7	1357	154	XP_026145710.1	XP_026145710.1 chromobox protein homolog 3-like [Carassius auratus]	CD_CSD superfamily	3.78e-18	Carassius auratus	Chordata
TRINITY_DN15793_c0_g1_i3	1048	150	XP_039279735.1	XP_039279735.1 putative nuclease HARBI1 [Nilaparvata lugens]	#N/A	2.79e-56	Nilaparvata lugens	Arthropoda
TRINITY_DN15793_c0_g1_i3	1048	150	XP_039618072.1	XP_039618072.1 putative nuclease HARBI1 [Polypterus senegalus]	#N/A	2.6e-26	Polypterus senegalus	Chordata
TRINITY_DN15793_c0_g1_i3	1048	150	XP_039590571.1	XP_039590571.1 putative nuclease HARBI1 [Polypterus senegalus]	#N/A	3.48e-26	Polypterus senegalus	Chordata
TRINITY_DN15793_c0_g1_i3	1048	150	XP_039602252.1	XP_039602252.1 putative nuclease HARBI1 [Polypterus senegalus]	#N/A	6.94e-26	Polypterus senegalus	Chordata
TRINITY_DN15793_c0_g1_i3	1048	150	XP_039618096.1	XP_039618096.1 putative nuclease HARBI1 [Polypterus senegalus]	#N/A	6.94e-26	Polypterus senegalus	Chordata
TRINITY_DN15793_c0_g1_i3	1048	150	XP_039626518.1	XP_039626518.1 putative nuclease HARBI1 [Polypterus senegalus]	#N/A	6.94e-26	Polypterus senegalus	Chordata
TRINITY_DN15793_c0_g1_i3	1048	150	XP_041837917.1	XP_041837917.1 putative nuclease HARBI1 [Melanotaenia boesemani]	#N/A	9.61e-26	Melanotaenia boesemani	Chordata
TRINITY_DN15793_c0_g1_i3	1048	150	XP_039610032.1	XP_039610032.1 putative nuclease HARBI1 [Polypterus senegalus]	#N/A	1.48e-25	Polypterus senegalus	Chordata
TRINITY_DN15793_c0_g1_i3	1048	150	ROL52987.1	ROL52987.1 Protein ANTAGONIST OF LIKE HETEROCHROMATIN PROTEIN 1 [Anabarilius grahami]	#N/A	1.51e-25	Anabarilius grahami	Chordata
TRINITY_DN15793_c0_g1_i3	1048	150	XP_039620777.1	XP_039620777.1 putative nuclease HARBI1 [Polypterus senegalus]	#N/A	1.79e-25	Polypterus senegalus	Chordata
TRINITY_DN15793_c0_g1_i3	1048	150	KAA0719755.1	KAA0719755.1 hypothetical protein E1301_Tti022785 [Triplophysa tibetana]	#N/A	6.18e-25	Triplophysa tibetana	Chordata
TRINITY_DN15793_c0_g1_i3	1048	150	XP_039613871.1	XP_039613871.1 putative nuclease HARBI1 [Polypterus senegalus]	#N/A	9.37e-25	Polypterus senegalus	Chordata
TRINITY_DN15793_c0_g1_i3	1048	150	RXN33043.1	RXN33043.1 nuclease HARBI1 [Labeo rohita]	#N/A	1.59e-24	Labeo rohita	Chordata
TRINITY_DN15793_c0_g1_i3	1048	150	XP_039623583.1	XP_039623583.1 putative nuclease HARBI1 [Polypterus senegalus]	#N/A	1.76e-24	Polypterus senegalus	Chordata
TRINITY_DN15793_c0_g1_i3	1048	150	MPV02312.1	MPV02312.1 transposase [Escherichia coli]	#N/A	1.85e-24	Escherichia coli	Proteobacteria
TRINITY_DN15793_c0_g1_i3	1048	150	XP_039618115.1	XP_039618115.1 putative nuclease HARBI1 [Polypterus senegalus]	#N/A	9.06e-24	Polypterus senegalus	Chordata
TRINITY_DN15793_c0_g1_i3	1048	150	XP_021326945.1	XP_021326945.1 putative nuclease HARBI1 [Danio rerio]	#N/A	4.49e-23	Danio rerio	Chordata
TRINITY_DN15793_c0_g1_i3	1048	150	WP_193644639.1	WP_193644639.1 transposase [Escherichia coli]	#N/A	5.2e-21	Escherichia coli	Proteobacteria
TRINITY_DN15793_c0_g1_i3	1048	150	XP_039598426.1	XP_039598426.1 putative nuclease HARBI1 [Polypterus senegalus]	#N/A	1.07e-19	Polypterus senegalus	Chordata
TRINITY_DN15793_c0_g1_i3	1048	150	XP_034334782.1	XP_034334782.1 putative nuclease HARBI1 [Crassostrea gigas]	#N/A	1.6e-19	Crassostrea gigas	Mollusca
TRINITY_DN12186_c0_g1_i9	2453	142	XP_041940766.1	XP_041940766.1 LOW QUALITY PROTEIN: zinc finger BED domain-containing protein 5-like [Alosa sapidissima]	#N/A	1.43e-69	Alosa sapidissima	Chordata
TRINITY_DN12186_c0_g1_i9	2453	142	XP_031330321.1	XP_031330321.1 zinc finger BED domain-containing protein 5-like [Photinus pyralis]	#N/A	9.37e-69	Photinus pyralis	Arthropoda
TRINITY_DN12186_c0_g1_i9	2453	142	XP_010779439.1	XP_010779439.1 PREDICTED: zinc finger BED domain-containing protein 5-like [Notothenia coriiceps]	#N/A	2.46e-68	Notothenia coriiceps	Chordata
TRINITY_DN12186_c0_g1_i9	2453	142	XP_030272781.1	XP_030272781.1 zinc finger BED domain-containing protein 5 [Sparus aurata]	#N/A	5.71e-68	Sparus aurata	Chordata
TRINITY_DN12186_c0_g1_i9	2453	142	XP_025761510.1	XP_025761510.1 zinc finger BED domain-containing protein 5-like isoform X2 [Oreochromis niloticus]	#N/A	4.17e-66	Oreochromis niloticus	Chordata
TRINITY_DN12186_c0_g1_i9	2453	142	XP_042071388.1	XP_042071388.1 zinc finger BED domain-containing protein 5-like [Haplochromis burtoni]	#N/A	5.72e-66	Haplochromis burtoni	Chordata
TRINITY_DN12186_c0_g1_i9	2453	142	XP_025761508.1	XP_025761508.1 zinc finger BED domain-containing protein 5-like isoform X1 [Oreochromis niloticus]	#N/A	6.2e-66	Oreochromis niloticus	Chordata
TRINITY_DN12186_c0_g1_i9	2453	142	XP_028179098.1	XP_028179098.1 zinc finger BED domain-containing protein 5-like [Ostrinia furnacalis]	#N/A	1.04e-65	Ostrinia furnacalis	Arthropoda
TRINITY_DN12186_c0_g1_i9	2453	142	XP_025761507.1	XP_025761507.1 zinc finger BED domain-containing protein 5-like [Oreochromis niloticus]	#N/A	3.22e-65	Oreochromis niloticus	Chordata
TRINITY_DN12186_c0_g1_i9	2453	142	XP_016420243.1	XP_016420243.1 PREDICTED: LOW QUALITY PROTEIN: zinc finger BED domain-containing protein 5-like [Sinocyclocheilus rhinocerous]	#N/A	4.06e-65	Sinocyclocheilus rhinocerous	Chordata
TRINITY_DN12186_c0_g1_i9	2453	142	XP_042073490.1	XP_042073490.1 zinc finger BED domain-containing protein 5-like [Haplochromis burtoni]	#N/A	6.99e-65	Haplochromis burtoni	Chordata
TRINITY_DN12186_c0_g1_i9	2453	142	VVC38789.1	VVC38789.1 HAT, C-terminal dimerisation domain,Domain of unknown function DUF4371 [Cinara cedri]	#N/A	2.67e-64	Cinara cedri	Arthropoda
TRINITY_DN12186_c0_g1_i9	2453	142	XP_041983257.1	XP_041983257.1 zinc finger BED domain-containing protein 5-like [Aricia agestis]	#N/A	3.61e-64	Aricia agestis	Arthropoda
TRINITY_DN12186_c0_g1_i9	2453	142	XP_014339928.1	XP_014339928.1 PREDICTED: zinc finger BED domain-containing protein 5-like, partial [Latimeria chalumnae]	#N/A	4.26e-64	Latimeria chalumnae	Chordata
TRINITY_DN12186_c0_g1_i9	2453	142	KMQ85013.1	KMQ85013.1 zinc finger bed domain-containing protein 5-like protein, partial [Lasius niger]	#N/A	7.14e-64	Lasius niger	Arthropoda
TRINITY_DN12186_c0_g1_i9	2453	142	XP_014353442.1	XP_014353442.1 PREDICTED: zinc finger BED domain-containing protein 5-like [Latimeria chalumnae]	#N/A	1.12e-63	Latimeria chalumnae	Chordata
TRINITY_DN12186_c0_g1_i9	2453	142	XP_022908673.1	XP_022908673.1 zinc finger BED domain-containing protein 5-like [Onthophagus taurus]	#N/A	1.43e-63	Onthophagus taurus	Arthropoda
TRINITY_DN12186_c0_g1_i9	2453	142	XP_033506785.1	XP_033506785.1 zinc finger BED domain-containing protein 5-like [Epinephelus lanceolatus]	#N/A	1.52e-63	Epinephelus lanceolatus	Chordata
TRINITY_DN12186_c0_g1_i9	2453	142	XP_025208538.1	XP_025208538.1 zinc finger BED domain-containing protein 5-like [Melanaphis sacchari]	#N/A	1.61e-63	Melanaphis sacchari	Arthropoda
TRINITY_DN12186_c0_g1_i9	2453	142	KAG6930544.1	KAG6930544.1 zinc finger BED-type containing 5 [Chelydra serpentina]	#N/A	1.62e-63	Chelydra serpentina	Chordata
TRINITY_DN79616_c0_g1_i1	1171	138	KAG8303770.1	KAG8303770.1 hypothetical protein J6590_002776 [Homalodisca vitripennis]	GPI_EPT_1	5.29e-126	Homalodisca vitripennis	Arthropoda
TRINITY_DN79616_c0_g1_i1	1171	138	XP_010304723.1	XP_010304723.1 PREDICTED: LOW QUALITY PROTEIN: GPI ethanolamine phosphate transferase 1-like, partial [Balearica regulorum gibbericeps]	GPI_EPT_1	1.57e-120	Balearica regulorum gibbericeps	Chordata
TRINITY_DN79616_c0_g1_i1	1171	138	XP_032644145.1	XP_032644145.1 GPI ethanolamine phosphate transferase 1, partial [Chelonoidis abingdonii]	GPI_EPT_1	3.11e-120	Chelonoidis abingdonii	Chordata
TRINITY_DN79616_c0_g1_i1	1171	138	XP_027763296.1	XP_027763296.1 GPI ethanolamine phosphate transferase 1-like, partial [Empidonax traillii]	GPI_EPT_1	6.24e-120	Empidonax traillii	Chordata
TRINITY_DN79616_c0_g1_i1	1171	138	XP_009977927.1	XP_009977927.1 PREDICTED: LOW QUALITY PROTEIN: GPI ethanolamine phosphate transferase 1 [Tauraco erythrolophus]	GPI_EPT_1	7.86e-120	Tauraco erythrolophus	Chordata
TRINITY_DN79616_c0_g1_i1	1171	138	XP_009695725.1	XP_009695725.1 PREDICTED: GPI ethanolamine phosphate transferase 1-like, partial [Cariama cristata]	GPI_EPT_1	2.69e-119	Cariama cristata	Chordata
TRINITY_DN79616_c0_g1_i1	1171	138	XP_010135345.1	XP_010135345.1 PREDICTED: GPI ethanolamine phosphate transferase 1-like, partial [Buceros rhinoceros silvestris]	GPI_EPT_1	5.24e-119	Buceros rhinoceros silvestris	Chordata
TRINITY_DN79616_c0_g1_i1	1171	138	XP_026471477.1	XP_026471477.1 GPI ethanolamine phosphate transferase 1-like [Ctenocephalides felis]	GPI_EPT_1	5.39e-119	Ctenocephalides felis	Arthropoda
TRINITY_DN79616_c0_g1_i1	1171	138	XP_015281523.1	XP_015281523.1 PREDICTED: GPI ethanolamine phosphate transferase 1-like, partial [Gekko japonicus]	GPI_EPT_1	1.44e-118	Gekko japonicus	Chordata
TRINITY_DN79616_c0_g1_i1	1171	138	EOB00214.1	EOB00214.1 GPI ethanolamine phosphate transferase 1 [Anas platyrhynchos]	GPI_EPT_1	2.58e-118	Anas platyrhynchos	Chordata
TRINITY_DN79616_c0_g1_i1	1171	138	XP_008939116.1	XP_008939116.1 PREDICTED: GPI ethanolamine phosphate transferase 1-like [Merops nubicus]	GPI_EPT_1	7.49e-118	Merops nubicus	Chordata
TRINITY_DN79616_c0_g1_i1	1171	138	NXH19634.1	NXH19634.1 PIGN transferase [Bucco capensis]	GPI_EPT_1	1.03e-117	Bucco capensis	Chordata
TRINITY_DN79616_c0_g1_i1	1171	138	KAF7485999.1	KAF7485999.1 hypothetical protein GHT09_002291 [Marmota monax]	GPI_EPT_1	1.9e-117	Marmota monax	Chordata
TRINITY_DN79616_c0_g1_i1	1171	138	CAF5026880.1	CAF5026880.1 unnamed protein product, partial [Ranitomeya imitator]	GPI_EPT_1	7.52e-117	Ranitomeya imitator	Chordata
TRINITY_DN79616_c0_g1_i1	1171	138	NXU30929.1	NXU30929.1 PIGN transferase [Thalassarche chlororhynchos]	GPI_EPT_1	1.17e-116	Thalassarche chlororhynchos	Chordata
TRINITY_DN79616_c0_g1_i1	1171	138	XP_010584287.1	XP_010584287.1 PREDICTED: GPI ethanolamine phosphate transferase 1 isoform X2 [Haliaeetus leucocephalus]	GPI_EPT_1	1.24e-116	Haliaeetus leucocephalus	Chordata
TRINITY_DN79616_c0_g1_i1	1171	138	NXQ95928.1	NXQ95928.1 PIGN transferase [Sagittarius serpentarius]	GPI_EPT_1	1.93e-116	Sagittarius serpentarius	Chordata
TRINITY_DN79616_c0_g1_i1	1171	138	NXX00329.1	NXX00329.1 PIGN transferase [Larus smithsonianus]	GPI_EPT_1	2.21e-116	Larus smithsonianus	Chordata
TRINITY_DN79616_c0_g1_i1	1171	138	BAA82663.1	BAA82663.1 phosphatidylinositolglycan class N [Mus musculus]	GPI_EPT_1	2.28e-116	Mus musculus	Chordata
TRINITY_DN79616_c0_g1_i1	1171	138	NWH42931.1	NWH42931.1 PIGN transferase [Fregata magnificens]	GPI_EPT_1	2.34e-116	Fregata magnificens	Chordata
TRINITY_DN118859_c0_g1_i1	1458	130	XP_039356466.1	XP_039356466.1 uncharacterized protein LOC120382989 isoform X3 [Mauremys reevesii]	Dimer_Tnp_hAT superfamily	4.04e-116	Mauremys reevesii	Chordata
TRINITY_DN118859_c0_g1_i1	1458	130	XP_039374036.1	XP_039374036.1 uncharacterized protein LOC120393505 isoform X3 [Mauremys reevesii]	Dimer_Tnp_hAT superfamily	1.98e-115	Mauremys reevesii	Chordata
TRINITY_DN118859_c0_g1_i1	1458	130	XP_030435447.1	XP_030435447.1 uncharacterized protein LOC115659446 isoform X3 [Gopherus evgoodei]	Dimer_Tnp_hAT superfamily	1.98e-115	Gopherus evgoodei	Chordata
TRINITY_DN118859_c0_g1_i1	1458	130	XP_037747759.1	XP_037747759.1 uncharacterized protein LOC114021973 [Chelonia mydas]	Dimer_Tnp_hAT superfamily	3.91e-115	Chelonia mydas	Chordata
TRINITY_DN118859_c0_g1_i1	1458	130	XP_038249475.1	XP_038249475.1 uncharacterized protein LOC119852322 [Dermochelys coriacea]	Dimer_Tnp_hAT superfamily	7.78e-115	Dermochelys coriacea	Chordata
TRINITY_DN118859_c0_g1_i1	1458	130	XP_030435446.1	XP_030435446.1 uncharacterized protein LOC115659446 isoform X2 [Gopherus evgoodei]	Dimer_Tnp_hAT superfamily	1.6e-114	Gopherus evgoodei	Chordata
TRINITY_DN118859_c0_g1_i1	1458	130	XP_039374035.1	XP_039374035.1 uncharacterized protein LOC120393505 isoform X2 [Mauremys reevesii]	Dimer_Tnp_hAT superfamily	1.6e-114	Mauremys reevesii	Chordata
TRINITY_DN118859_c0_g1_i1	1458	130	XP_039374032.1	XP_039374032.1 uncharacterized protein LOC120393505 isoform X1 [Mauremys reevesii]	Dimer_Tnp_hAT superfamily	1.63e-114	Mauremys reevesii	Chordata
TRINITY_DN118859_c0_g1_i1	1458	130	XP_030435439.1	XP_030435439.1 uncharacterized protein LOC115659446 isoform X1 [Gopherus evgoodei]	Dimer_Tnp_hAT superfamily	1.63e-114	Gopherus evgoodei	Chordata
TRINITY_DN118859_c0_g1_i1	1458	130	XP_039356465.1	XP_039356465.1 uncharacterized protein LOC120382989 isoform X2 [Mauremys reevesii]	Dimer_Tnp_hAT superfamily	3.35e-114	Mauremys reevesii	Chordata
TRINITY_DN118859_c0_g1_i1	1458	130	XP_039356463.1	XP_039356463.1 uncharacterized protein LOC120382989 isoform X1 [Mauremys reevesii]	Dimer_Tnp_hAT superfamily	3.42e-114	Mauremys reevesii	Chordata
TRINITY_DN118859_c0_g1_i1	1458	130	XP_027680471.2	XP_027680471.2 uncharacterized protein LOC114020073 isoform X3 [Chelonia mydas]	Dimer_Tnp_hAT superfamily	1.74e-113	Chelonia mydas	Chordata
TRINITY_DN118859_c0_g1_i1	1458	130	KAG6929560.1	KAG6929560.1 hypothetical protein G0U57_005377 [Chelydra serpentina]	Dimer_Tnp_hAT superfamily	1.78e-113	Chelydra serpentina	Chordata
TRINITY_DN118859_c0_g1_i1	1458	130	XP_037769431.1	XP_037769431.1 uncharacterized protein LOC114020073 isoform X2 [Chelonia mydas]	Dimer_Tnp_hAT superfamily	3.53e-113	Chelonia mydas	Chordata
TRINITY_DN118859_c0_g1_i1	1458	130	XP_037769430.1	XP_037769430.1 uncharacterized protein LOC114020073 isoform X1 [Chelonia mydas]	Dimer_Tnp_hAT superfamily	3.61e-113	Chelonia mydas	Chordata
TRINITY_DN118859_c0_g1_i1	1458	130	XP_032636487.1	XP_032636487.1 uncharacterized protein LOC116824950 isoform X2 [Chelonoidis abingdonii]	Dimer_Tnp_hAT superfamily	3.73e-113	Chelonoidis abingdonii	Chordata
TRINITY_DN118859_c0_g1_i1	1458	130	XP_032636485.1	XP_032636485.1 uncharacterized protein LOC116824950 isoform X1 [Chelonoidis abingdonii]	Dimer_Tnp_hAT superfamily	3.85e-113	Chelonoidis abingdonii	Chordata
TRINITY_DN118859_c0_g1_i1	1458	130	XP_032620458.1	XP_032620458.1 zinc finger and SCAN domain-containing protein 12-like isoform X3 [Chelonoidis abingdonii]	Dimer_Tnp_hAT superfamily	2.52e-112	Chelonoidis abingdonii	Chordata
TRINITY_DN118859_c0_g1_i1	1458	130	XP_030399927.1	XP_030399927.1 zinc finger protein interacting with ribonucleoprotein K-like isoform X3 [Gopherus evgoodei]	Dimer_Tnp_hAT superfamily	2.79e-112	Gopherus evgoodei	Chordata
TRINITY_DN118859_c0_g1_i1	1458	130	XP_029770128.1	XP_029770128.1 uncharacterized protein LOC112103657 isoform X2 [Terrapene carolina triunguis]	Dimer_Tnp_hAT superfamily	3.83e-112	Terrapene carolina triunguis	Chordata
TRINITY_DN11708_c0_g1_i7	841	130	RXN12993.1	RXN12993.1 ac transposable element-derived 4 [Labeo rohita]	#N/A	5.25e-14	Labeo rohita	Chordata
TRINITY_DN11708_c0_g1_i7	841	130	RXN21653.1	RXN21653.1 ac transposable element-derived 4 [Labeo rohita]	#N/A	3.54e-13	Labeo rohita	Chordata
TRINITY_DN11708_c0_g1_i7	841	130	KAG7468736.1	KAG7468736.1 ac transposable element-derived 4 [Solea senegalensis]	#N/A	4.09e-13	Solea senegalensis	Chordata
TRINITY_DN11708_c0_g1_i7	841	130	RXN38657.1	RXN38657.1 galectin-3-binding A-like protein [Labeo rohita]	#N/A	4.83e-13	Labeo rohita	Chordata
TRINITY_DN11708_c0_g1_i7	841	130	KAE8278734.1	KAE8278734.1 hypothetical protein D5F01_LYC23653 [Larimichthys crocea]	#N/A	5.09e-13	Larimichthys crocea	Chordata
TRINITY_DN11708_c0_g1_i7	841	130	RXN15786.1	RXN15786.1 galectin-3-binding A-like protein [Labeo rohita]	#N/A	5.71e-13	Labeo rohita	Chordata
TRINITY_DN11708_c0_g1_i7	841	130	KAE8295252.1	KAE8295252.1 hypothetical protein D5F01_LYC06178 [Larimichthys crocea]	#N/A	6.13e-13	Larimichthys crocea	Chordata
TRINITY_DN11708_c0_g1_i7	841	130	RXN38656.1	RXN38656.1 golgin subfamily A member 6C [Labeo rohita]	#N/A	6.7e-13	Labeo rohita	Chordata
TRINITY_DN11708_c0_g1_i7	841	130	KAE8286299.1	KAE8286299.1 hypothetical protein D5F01_LYC15984 [Larimichthys crocea]	#N/A	9.95e-13	Larimichthys crocea	Chordata
TRINITY_DN11708_c0_g1_i7	841	130	KAE8278193.1	KAE8278193.1 hypothetical protein D5F01_LYC23744 [Larimichthys crocea]	#N/A	1.01e-12	Larimichthys crocea	Chordata
TRINITY_DN11708_c0_g1_i7	841	130	KAE8287264.1	KAE8287264.1 hypothetical protein D5F01_LYC15236 [Larimichthys crocea]	#N/A	1.9e-12	Larimichthys crocea	Chordata
TRINITY_DN11708_c0_g1_i7	841	130	KAE8289671.1	KAE8289671.1 hypothetical protein D5F01_LYC11377 [Larimichthys crocea]	#N/A	2.61e-12	Larimichthys crocea	Chordata
TRINITY_DN11708_c0_g1_i7	841	130	XP_025029754.1	XP_025029754.1 uncharacterized protein LOC107326422 [Python bivittatus]	#N/A	1.33e-11	Python bivittatus	Chordata
TRINITY_DN11708_c0_g1_i7	841	130	XP_030750277.1	XP_030750277.1 uncharacterized protein LOC115878062 [Sitophilus oryzae]	#N/A	4.39e-11	Sitophilus oryzae	Arthropoda
TRINITY_DN11708_c0_g1_i7	841	130	CAD2145182.1	CAD2145182.1 unnamed protein product [Meloidogyne enterolobii]	#N/A	4.81e-11	Meloidogyne enterolobii	Nematoda
TRINITY_DN11708_c0_g1_i7	841	130	XP_028595022.1	XP_028595022.1 uncharacterized protein LOC114601727 [Podarcis muralis]	#N/A	1.09e-10	Podarcis muralis	Chordata
TRINITY_DN11708_c0_g1_i7	841	130	CAB4061898.1	CAB4061898.1 unnamed protein product [Lepeophtheirus salmonis]	#N/A	2.44e-10	Lepeophtheirus salmonis	Arthropoda
TRINITY_DN11708_c0_g1_i7	841	130	XP_028566006.1	XP_028566006.1 uncharacterized protein LOC114586556 isoform X2 [Podarcis muralis]	#N/A	2.62e-10	Podarcis muralis	Chordata
TRINITY_DN11708_c0_g1_i7	841	130	XP_030753319.1	XP_030753319.1 uncharacterized protein LOC115880276 [Sitophilus oryzae]	#N/A	2.67e-10	Sitophilus oryzae	Arthropoda
TRINITY_DN11708_c0_g1_i7	841	130	XP_028566005.1	XP_028566005.1 uncharacterized protein LOC114586556 isoform X1 [Podarcis muralis]	#N/A	2.71e-10	Podarcis muralis	Chordata
TRINITY_DN85087_c0_g2_i1	1279	128	XP_006013203.1	XP_006013203.1 PREDICTED: late histone H2B.L4-like [Latimeria chalumnae]	H2B superfamily	5.85e-19	Latimeria chalumnae	Chordata
TRINITY_DN85087_c0_g2_i1	1279	128	VDD90852.1	VDD90852.1 unnamed protein product [Enterobius vermicularis]	H2B superfamily	1.08e-18	Enterobius vermicularis	Nematoda
TRINITY_DN85087_c0_g2_i1	1279	128	XP_039999304.1	XP_039999304.1 late histone H2B.L4 [Xiphias gladius]	H2B superfamily	1.74e-18	Xiphias gladius	Chordata
TRINITY_DN85087_c0_g2_i1	1279	128	XP_014913887.1	XP_014913887.1 PREDICTED: late histone H2B.L4-like isoform X2 [Poecilia latipinna]	H2B superfamily	2.4e-18	Poecilia latipinna	Chordata
TRINITY_DN85087_c0_g2_i1	1279	128	XP_007548720.1	XP_007548720.1 PREDICTED: late histone H2B.L4 isoform X2 [Poecilia formosa]	H2B superfamily	2.4e-18	Poecilia formosa;Poecilia mexicana	Chordata
TRINITY_DN85087_c0_g2_i1	1279	128	XP_041068403.1	XP_041068403.1 histone H2B 7-like [Carcharodon carcharias]	H2B superfamily	2.4e-18	Carcharodon carcharias	Chordata
TRINITY_DN85087_c0_g2_i1	1279	128	CBM82450.1	CBM82450.1 histone H2B-I protein [Balanoglossus clavigerus]	H2B superfamily	2.84e-18	Balanoglossus clavigerus	Hemichordata
TRINITY_DN85087_c0_g2_i1	1279	128	CAB3402526.1	CAB3402526.1 unnamed protein product [Caenorhabditis bovis]	H2B superfamily	3.18e-18	Caenorhabditis bovis	Nematoda
TRINITY_DN85087_c0_g2_i1	1279	128	XP_041849667.1	XP_041849667.1 zgc:92591 [Melanotaenia boesemani]	H2B superfamily	3.31e-18	Melanotaenia boesemani	Chordata
TRINITY_DN85087_c0_g2_i1	1279	128	XP_026229457.1	XP_026229457.1 late histone H2B.L4 [Anabas testudineus]	H2B superfamily	3.31e-18	Anabas testudineus;Toxotes jaculatrix	Chordata
TRINITY_DN85087_c0_g2_i1	1279	128	XP_008281242.1	XP_008281242.1 PREDICTED: late histone H2B.L4-like [Stegastes partitus]	H2B superfamily	3.31e-18	Sparus aurata;Acanthopagrus latus;Lates calcarifer;Stegastes partitus	Chordata
TRINITY_DN85087_c0_g2_i1	1279	128	XP_003245102.1	XP_003245102.1 late histone H2B.L4-like [Acyrthosiphon pisum]	H2B superfamily	3.34e-18	Acyrthosiphon pisum	Arthropoda
TRINITY_DN85087_c0_g2_i1	1279	128	VBB28613.1	VBB28613.1 unnamed protein product [Acanthocheilonema viteae]	H2B superfamily	4.27e-18	Acanthocheilonema viteae	Nematoda
TRINITY_DN85087_c0_g2_i1	1279	128	XP_034038946.1	XP_034038946.1 late histone H2B.L4 [Thalassophryne amazonica]	H2B superfamily	4.57e-18	Thalassophryne amazonica	Chordata
TRINITY_DN85087_c0_g2_i1	1279	128	XP_003438147.1	XP_003438147.1 late histone H2B.L4 [Oreochromis niloticus]	H2B superfamily	4.57e-18	Oreochromis niloticus;Oreochromis aureus	Chordata
TRINITY_DN85087_c0_g2_i1	1279	128	XP_027876281.1	XP_027876281.1 late histone H2B.L4-like [Xiphophorus couchianus]	H2B superfamily	4.57e-18	Xiphophorus couchianus	Chordata
TRINITY_DN85087_c0_g2_i1	1279	128	XP_005807632.1	XP_005807632.1 late histone H2B.L4-like [Xiphophorus maculatus]	H2B superfamily	4.57e-18	Xiphophorus maculatus	Chordata
TRINITY_DN85087_c0_g2_i1	1279	128	VDD94553.1	VDD94553.1 unnamed protein product [Enterobius vermicularis]	H2B superfamily	5.39e-18	Enterobius vermicularis	Nematoda
TRINITY_DN85087_c0_g2_i1	1279	128	XP_008432497.1	XP_008432497.1 PREDICTED: late histone H2B.L4 [Poecilia reticulata]	H2B superfamily	6.3e-18	Poecilia reticulata	Chordata
TRINITY_DN85087_c0_g2_i1	1279	128	KAF4919518.1	KAF4919518.1 Histone H2B 7 [Colletotrichum fructicola]	H2B superfamily	7.43e-18	Colletotrichum fructicola	Ascomycota
TRINITY_DN103972_c0_g1_i1	978	122	NXG52783.1	NXG52783.1 RN115 ligase [Psilopogon haemacephalus]	RING-H2_PA-TM-RING	5.53e-16	Psilopogon haemacephalus	Chordata
TRINITY_DN103972_c0_g1_i1	978	122	NXR26046.1	NXR26046.1 RN115 ligase [Cinclus mexicanus]	RING-H2_PA-TM-RING	1.07e-15	Cinclus mexicanus	Chordata
TRINITY_DN103972_c0_g1_i1	978	122	NWV20392.1	NWV20392.1 RN115 ligase [Origma solitaria]	RING-H2_PA-TM-RING	1.54e-15	Origma solitaria	Chordata
TRINITY_DN103972_c0_g1_i1	978	122	NWI04665.1	NWI04665.1 RN115 ligase [Tichodroma muraria]	RING-H2_PA-TM-RING	2.05e-15	Tichodroma muraria;Atrichornis clamosus	Chordata
TRINITY_DN103972_c0_g1_i1	978	122	NXW81849.1	NXW81849.1 RN115 ligase [Alopecoenas beccarii]	RING-H2_PA-TM-RING	2.05e-15	Alopecoenas beccarii	Chordata
TRINITY_DN103972_c0_g1_i1	978	122	NXE99489.1	NXE99489.1 RN115 ligase [Menura novaehollandiae]	RING-H2_PA-TM-RING	2.05e-15	Menura novaehollandiae	Chordata
TRINITY_DN103972_c0_g1_i1	978	122	NWU44724.1	NWU44724.1 RN115 ligase [Hylia prasina]	RING-H2_PA-TM-RING	2.76e-15	Hylia prasina	Chordata
TRINITY_DN103972_c0_g1_i1	978	122	NWU12955.1	NWU12955.1 RN115 ligase [Cephalopterus ornatus]	RING-H2_PA-TM-RING	2.78e-15	Cephalopterus ornatus	Chordata
TRINITY_DN103972_c0_g1_i1	978	122	NWS00301.1	NWS00301.1 RN115 ligase [Motacilla alba]	RING-H2_PA-TM-RING	2.83e-15	Motacilla alba	Chordata
TRINITY_DN103972_c0_g1_i1	978	122	NXU45107.1	NXU45107.1 RN115 ligase [Drymodes brunneopygia]	RING-H2_PA-TM-RING	2.85e-15	Drymodes brunneopygia	Chordata
TRINITY_DN103972_c0_g1_i1	978	122	NXB44870.1	NXB44870.1 RN115 ligase [Leucopsar rothschildi]	RING-H2_PA-TM-RING	3.85e-15	Leucopsar rothschildi;Catharus fuscescens;Rhabdornis inornatus	Chordata
TRINITY_DN103972_c0_g1_i1	978	122	NXU07573.1	NXU07573.1 RN115 ligase [Buphagus erythrorhynchus]	RING-H2_PA-TM-RING	3.95e-15	Buphagus erythrorhynchus	Chordata
TRINITY_DN103972_c0_g1_i1	978	122	NXC90142.1	NXC90142.1 RN115 ligase [Cercotrichas coryphoeus]	RING-H2_PA-TM-RING	3.95e-15	Oenanthe oenanthe;Cercotrichas coryphoeus;Copsychus sechellarum	Chordata
TRINITY_DN103972_c0_g1_i1	978	122	NWY64559.1	NWY64559.1 RN115 ligase [Erithacus rubecula]	RING-H2_PA-TM-RING	3.95e-15	Erithacus rubecula	Chordata
TRINITY_DN103972_c0_g1_i1	978	122	NXE71741.1	NXE71741.1 RN115 ligase [Calcarius ornatus]	RING-H2_PA-TM-RING	5.13e-15	Calcarius ornatus	Chordata
TRINITY_DN103972_c0_g1_i1	978	122	NXW37867.1	NXW37867.1 RN115 ligase [Phaetusa simplex]	RING-H2_PA-TM-RING	5.32e-15	Phaetusa simplex	Chordata
TRINITY_DN103972_c0_g1_i1	978	122	NWS92580.1	NWS92580.1 RN115 ligase [Toxostoma redivivum]	RING-H2_PA-TM-RING	5.34e-15	Toxostoma redivivum	Chordata
TRINITY_DN103972_c0_g1_i1	978	122	NXU09486.1	NXU09486.1 RN115 ligase [Pardalotus punctatus]	RING-H2_PA-TM-RING	5.7e-15	Pardalotus punctatus	Chordata
TRINITY_DN103972_c0_g1_i1	978	122	RLV63600.1	RLV63600.1 hypothetical protein DV515_00018109 [Chloebia gouldiae]	RING-H2_PA-TM-RING	6.51e-15	Chloebia gouldiae	Chordata
TRINITY_DN103972_c0_g1_i1	978	122	NXC29128.1	NXC29128.1 RN115 ligase [Campylorhamphus procurvoides]	RING-H2_PA-TM-RING	7.22e-15	Campylorhamphus procurvoides	Chordata
TRINITY_DN1121_c0_g2_i2	758	122	TEA38059.1	TEA38059.1 hypothetical protein DBR06_SOUSAS27910054 [Sousa chinensis]	RHOD superfamily	4.75e-19	Sousa chinensis	Chordata
TRINITY_DN1121_c0_g2_i2	758	122	XP_004284523.1	XP_004284523.1 thiosulfate:glutathione sulfurtransferase isoform X1 [Orcinus orca]	RHOD superfamily	4.75e-19	Orcinus orca;Tursiops truncatus;Lagenorhynchus obliquidens	Chordata
TRINITY_DN1121_c0_g2_i2	758	122	XP_030698011.1	XP_030698011.1 thiosulfate:glutathione sulfurtransferase [Globicephala melas]	RHOD superfamily	4.75e-19	Globicephala melas	Chordata
TRINITY_DN1121_c0_g2_i2	758	122	XP_037533083.1	XP_037533083.1 thiosulfate sulfurtransferase/rhodanese-like domain-containing protein 3 [Nematolebias whitei]	RHOD superfamily	5.92e-19	Nematolebias whitei	Chordata
TRINITY_DN1121_c0_g2_i2	758	122	KAG5856907.1	KAG5856907.1 hypothetical protein ANANG_G00012900 [Anguilla anguilla]	RHOD superfamily	8.1e-19	Anguilla anguilla	Chordata
TRINITY_DN1121_c0_g2_i2	758	122	XP_023311468.1	XP_023311468.1 heat shock protein 67B2-like isoform X2 [Anoplophora glabripennis]	RHOD superfamily	8.38e-19	Anoplophora glabripennis	Arthropoda
TRINITY_DN1121_c0_g2_i2	758	122	KAB0393464.1	KAB0393464.1 hypothetical protein E2I00_002928, partial [Balaenoptera physalus]	RHOD superfamily	8.87e-19	Balaenoptera physalus	Chordata
TRINITY_DN1121_c0_g2_i2	758	122	XP_007467168.1	XP_007467168.1 PREDICTED: thiosulfate sulfurtransferase/rhodanese-like domain-containing protein 1 [Lipotes vexillifer]	RHOD superfamily	9.35e-19	Lipotes vexillifer	Chordata
TRINITY_DN1121_c0_g2_i2	758	122	XP_032491200.1	XP_032491200.1 thiosulfate:glutathione sulfurtransferase isoform X1 [Phocoena sinus]	RHOD superfamily	1.31e-18	Phocoena sinus	Chordata
TRINITY_DN1121_c0_g2_i2	758	122	XP_007171804.1	XP_007171804.1 thiosulfate:glutathione sulfurtransferase [Balaenoptera acutorostrata scammoni]	RHOD superfamily	1.84e-18	Balaenoptera acutorostrata scammoni	Chordata
TRINITY_DN1121_c0_g2_i2	758	122	XP_036680332.1	XP_036680332.1 thiosulfate:glutathione sulfurtransferase [Balaenoptera musculus]	RHOD superfamily	1.84e-18	Balaenoptera musculus	Chordata
TRINITY_DN1121_c0_g2_i2	758	122	XP_029087122.1	XP_029087122.1 thiosulfate:glutathione sulfurtransferase isoform X1 [Monodon monoceros]	RHOD superfamily	1.84e-18	Monodon monoceros	Chordata
TRINITY_DN1121_c0_g2_i2	758	122	XP_039974879.1	XP_039974879.1 thiosulfate sulfurtransferase/rhodanese-like domain-containing protein 3 [Xiphias gladius]	RHOD superfamily	3.42e-18	Xiphias gladius	Chordata
TRINITY_DN1121_c0_g2_i2	758	122	XP_017268737.1	XP_017268737.1 thiosulfate sulfurtransferase/rhodanese-like domain-containing protein 3 [Kryptolebias marmoratus]	RHOD superfamily	4.04e-18	Kryptolebias marmoratus	Chordata
TRINITY_DN1121_c0_g2_i2	758	122	XP_008117270.1	XP_008117270.1 PREDICTED: thiosulfate sulfurtransferase/rhodanese-like domain-containing protein 3 [Anolis carolinensis]	RHOD superfamily	4.24e-18	Anolis carolinensis	Chordata
TRINITY_DN1121_c0_g2_i2	758	122	XP_024613218.1	XP_024613218.1 thiosulfate:glutathione sulfurtransferase isoform X1 [Neophocaena asiaeorientalis asiaeorientalis]	RHOD superfamily	5.06e-18	Neophocaena asiaeorientalis asiaeorientalis	Chordata
TRINITY_DN1121_c0_g2_i2	758	122	XP_022415111.1	XP_022415111.1 thiosulfate:glutathione sulfurtransferase isoform X1 [Delphinapterus leucas]	RHOD superfamily	5.06e-18	Delphinapterus leucas	Chordata
TRINITY_DN1121_c0_g2_i2	758	122	XP_035246664.1	XP_035246664.1 thiosulfate sulfurtransferase/rhodanese-like domain-containing protein 3 [Anguilla anguilla]	RHOD superfamily	6.07e-18	Anguilla anguilla	Chordata
TRINITY_DN1121_c0_g2_i2	758	122	XP_017037906.1	XP_017037906.1 rhodanese domain-containing protein CG4456 [Drosophila kikkawai]	RHOD superfamily	7.15e-18	Drosophila kikkawai	Arthropoda
TRINITY_DN1121_c0_g2_i2	758	122	XP_028986135.1	XP_028986135.1 thiosulfate sulfurtransferase/rhodanese-like domain-containing protein 3 [Betta splendens]	RHOD superfamily	7.92e-18	Betta splendens	Chordata
TRINITY_DN15793_c0_g1_i8	1441	122	XP_039279735.1	XP_039279735.1 putative nuclease HARBI1 [Nilaparvata lugens]	#N/A	9.6e-33	Nilaparvata lugens	Arthropoda
TRINITY_DN15793_c0_g1_i8	1441	122	XP_041837917.1	XP_041837917.1 putative nuclease HARBI1 [Melanotaenia boesemani]	#N/A	1.19e-15	Melanotaenia boesemani	Chordata
TRINITY_DN15793_c0_g1_i8	1441	122	XP_021326945.1	XP_021326945.1 putative nuclease HARBI1 [Danio rerio]	#N/A	5.26e-15	Danio rerio	Chordata
TRINITY_DN15793_c0_g1_i8	1441	122	ROL52987.1	ROL52987.1 Protein ANTAGONIST OF LIKE HETEROCHROMATIN PROTEIN 1 [Anabarilius grahami]	#N/A	9.76e-15	Anabarilius grahami	Chordata
TRINITY_DN15793_c0_g1_i8	1441	122	XP_039618072.1	XP_039618072.1 putative nuclease HARBI1 [Polypterus senegalus]	#N/A	1.76e-14	Polypterus senegalus	Chordata
TRINITY_DN15793_c0_g1_i8	1441	122	RXN33043.1	RXN33043.1 nuclease HARBI1 [Labeo rohita]	#N/A	1.87e-14	Labeo rohita	Chordata
TRINITY_DN15793_c0_g1_i8	1441	122	XP_039590571.1	XP_039590571.1 putative nuclease HARBI1 [Polypterus senegalus]	#N/A	2.53e-14	Polypterus senegalus	Chordata
TRINITY_DN15793_c0_g1_i8	1441	122	XP_039608641.1	XP_039608641.1 putative nuclease HARBI1 [Polypterus senegalus]	#N/A	2.56e-14	Polypterus senegalus	Chordata
TRINITY_DN15793_c0_g1_i8	1441	122	XP_039602252.1	XP_039602252.1 putative nuclease HARBI1 [Polypterus senegalus]	#N/A	4.3e-14	Polypterus senegalus	Chordata
TRINITY_DN15793_c0_g1_i8	1441	122	XP_039618096.1	XP_039618096.1 putative nuclease HARBI1 [Polypterus senegalus]	#N/A	4.3e-14	Polypterus senegalus	Chordata
TRINITY_DN15793_c0_g1_i8	1441	122	XP_039626518.1	XP_039626518.1 putative nuclease HARBI1 [Polypterus senegalus]	#N/A	4.3e-14	Polypterus senegalus	Chordata
TRINITY_DN15793_c0_g1_i8	1441	122	XP_039610032.1	XP_039610032.1 putative nuclease HARBI1 [Polypterus senegalus]	#N/A	4.99e-14	Polypterus senegalus	Chordata
TRINITY_DN15793_c0_g1_i8	1441	122	XP_039623583.1	XP_039623583.1 putative nuclease HARBI1 [Polypterus senegalus]	#N/A	6.21e-14	Polypterus senegalus	Chordata
TRINITY_DN15793_c0_g1_i8	1441	122	XP_039620777.1	XP_039620777.1 putative nuclease HARBI1 [Polypterus senegalus]	#N/A	1.13e-13	Polypterus senegalus	Chordata
TRINITY_DN15793_c0_g1_i8	1441	122	WP_193644639.1	WP_193644639.1 transposase [Escherichia coli]	#N/A	1.42e-13	Escherichia coli	Proteobacteria
TRINITY_DN15793_c0_g1_i8	1441	122	MPV02312.1	MPV02312.1 transposase [Escherichia coli]	#N/A	1.94e-13	Escherichia coli	Proteobacteria
TRINITY_DN15793_c0_g1_i8	1441	122	KAA0719755.1	KAA0719755.1 hypothetical protein E1301_Tti022785 [Triplophysa tibetana]	#N/A	2.13e-13	Triplophysa tibetana	Chordata
TRINITY_DN15793_c0_g1_i8	1441	122	XP_039613871.1	XP_039613871.1 putative nuclease HARBI1 [Polypterus senegalus]	#N/A	4.63e-13	Polypterus senegalus	Chordata
TRINITY_DN15793_c0_g1_i8	1441	122	XP_039618115.1	XP_039618115.1 putative nuclease HARBI1 [Polypterus senegalus]	#N/A	1.51e-12	Polypterus senegalus	Chordata
TRINITY_DN15793_c0_g1_i8	1441	122	XP_022300734.1	XP_022300734.1 putative nuclease HARBI1 [Crassostrea virginica]	#N/A	3.89e-11	Crassostrea virginica	Mollusca
TRINITY_DN4518_c0_g2_i1	1096	110	XP_041842116.1	XP_041842116.1 zinc finger MYM-type protein 1-like isoform X2 [Melanotaenia boesemani]	DUF4371 superfamily	4.35e-101	Melanotaenia boesemani	Chordata
TRINITY_DN4518_c0_g2_i1	1096	110	XP_041842115.1	XP_041842115.1 zinc finger MYM-type protein 1-like isoform X1 [Melanotaenia boesemani]	DUF4371 superfamily	6.3e-101	Melanotaenia boesemani	Chordata
TRINITY_DN4518_c0_g2_i1	1096	110	GFO21201.1	GFO21201.1 hypothetical protein PoB_004770600 [Plakobranchus ocellatus]	DUF4371 superfamily	1.22e-94	Plakobranchus ocellatus	Mollusca
TRINITY_DN4518_c0_g2_i1	1096	110	XP_040187748.1	XP_040187748.1 zinc finger MYM-type protein 1-like [Rana temporaria]	DUF4371 superfamily	7.88e-89	Rana temporaria	Chordata
TRINITY_DN4518_c0_g2_i1	1096	110	XP_033988918.1	XP_033988918.1 zinc finger MYM-type protein 1-like [Trematomus bernacchii]	DUF4371 superfamily	9.41e-88	Trematomus bernacchii	Chordata
TRINITY_DN4518_c0_g2_i1	1096	110	XP_040189964.1	XP_040189964.1 zinc finger MYM-type protein 1-like [Rana temporaria]	DUF4371 superfamily	1.34e-87	Rana temporaria	Chordata
TRINITY_DN4518_c0_g2_i1	1096	110	RXN05739.1	RXN05739.1 zinc finger MYM-type 1-like protein [Labeo rohita]	DUF4371 superfamily	2.61e-87	Labeo rohita	Chordata
TRINITY_DN4518_c0_g2_i1	1096	110	XP_022521450.1	XP_022521450.1 zinc finger MYM-type protein 1-like [Astyanax mexicanus]	DUF4371 superfamily	2.91e-87	Astyanax mexicanus	Chordata
TRINITY_DN4518_c0_g2_i1	1096	110	XP_033991142.1	XP_033991142.1 zinc finger MYM-type protein 1-like [Trematomus bernacchii]	DUF4371 superfamily	3.17e-87	Trematomus bernacchii	Chordata
TRINITY_DN4518_c0_g2_i1	1096	110	RXN35740.1	RXN35740.1 zinc finger MYM-type 1-like protein [Labeo rohita]	DUF4371 superfamily	9.21e-87	Labeo rohita	Chordata
TRINITY_DN4518_c0_g2_i1	1096	110	XP_040192709.1	XP_040192709.1 zinc finger MYM-type protein 1-like [Rana temporaria]	DUF4371 superfamily	1.44e-86	Rana temporaria	Chordata
TRINITY_DN4518_c0_g2_i1	1096	110	XP_033986841.1	XP_033986841.1 zinc finger MYM-type protein 1-like [Trematomus bernacchii]	DUF4371 superfamily	1.78e-86	Trematomus bernacchii	Chordata
TRINITY_DN4518_c0_g2_i1	1096	110	XP_005109313.1	XP_005109313.1 uncharacterized protein LOC101850037 [Aplysia californica]	DUF4371 superfamily	1.89e-86	Aplysia californica	Mollusca
TRINITY_DN4518_c0_g2_i1	1096	110	XP_033998311.1	XP_033998311.1 zinc finger MYM-type protein 1-like [Trematomus bernacchii]	DUF4371 superfamily	4.34e-86	Trematomus bernacchii	Chordata
TRINITY_DN4518_c0_g2_i1	1096	110	XP_033976228.1	XP_033976228.1 zinc finger MYM-type protein 1-like [Trematomus bernacchii]	DUF4371 superfamily	4.34e-86	Trematomus bernacchii	Chordata
TRINITY_DN4518_c0_g2_i1	1096	110	XP_033986973.1	XP_033986973.1 zinc finger MYM-type protein 1-like [Trematomus bernacchii]	DUF4371 superfamily	4.78e-86	Trematomus bernacchii	Chordata
TRINITY_DN4518_c0_g2_i1	1096	110	XP_030298037.1	XP_030298037.1 zinc finger MYM-type protein 1-like [Sparus aurata]	DUF4371 superfamily	6.6e-86	Sparus aurata	Chordata
TRINITY_DN4518_c0_g2_i1	1096	110	XP_033977734.1	XP_033977734.1 zinc finger MYM-type protein 1-like [Trematomus bernacchii]	DUF4371 superfamily	9.4e-86	Trematomus bernacchii	Chordata
TRINITY_DN4518_c0_g2_i1	1096	110	XP_033987864.1	XP_033987864.1 zinc finger MYM-type protein 1-like [Trematomus bernacchii]	DUF4371 superfamily	9.4e-86	Trematomus bernacchii	Chordata
TRINITY_DN4518_c0_g2_i1	1096	110	XP_033987447.1	XP_033987447.1 zinc finger MYM-type protein 1-like [Trematomus bernacchii]	DUF4371 superfamily	1.21e-85	Trematomus bernacchii	Chordata
TRINITY_DN58878_c0_g2_i1	1283	110	XP_022167165.1	XP_022167165.1 zinc finger BED domain-containing protein 1-like, partial [Myzus persicae]	#N/A	3.81e-74	Myzus persicae	Arthropoda
TRINITY_DN58878_c0_g2_i1	1283	110	XP_028674317.1	XP_028674317.1 zinc finger BED domain-containing protein 1-like [Erpetoichthys calabaricus]	#N/A	1.05e-69	Erpetoichthys calabaricus	Chordata
TRINITY_DN58878_c0_g2_i1	1283	110	KAE8284742.1	KAE8284742.1 hypothetical protein D5F01_LYC16176 [Larimichthys crocea]	#N/A	1.37e-69	Larimichthys crocea	Chordata
TRINITY_DN58878_c0_g2_i1	1283	110	XP_018956210.2	XP_018956210.2 uncharacterized protein LOC109086182 [Cyprinus carpio]	#N/A	1.46e-69	Cyprinus carpio	Chordata
TRINITY_DN58878_c0_g2_i1	1283	110	RXN17131.1	RXN17131.1 AC transposase [Labeo rohita]	#N/A	5.18e-69	Labeo rohita	Chordata
TRINITY_DN58878_c0_g2_i1	1283	110	XP_028656743.1	XP_028656743.1 zinc finger BED domain-containing protein 1-like [Erpetoichthys calabaricus]	#N/A	5.65e-69	Erpetoichthys calabaricus	Chordata
TRINITY_DN58878_c0_g2_i1	1283	110	KAF0741198.1	KAF0741198.1 zinc finger BED domain-containing protein 1-like, partial [Aphis craccivora]	#N/A	1.19e-68	Aphis craccivora	Arthropoda
TRINITY_DN58878_c0_g2_i1	1283	110	XP_030197362.1	XP_030197362.1 uncharacterized protein LOC115532043 [Gadus morhua]	#N/A	2.29e-68	Gadus morhua	Chordata
TRINITY_DN58878_c0_g2_i1	1283	110	XP_039596674.1	XP_039596674.1 uncharacterized protein zgc:161969 isoform X2 [Polypterus senegalus]	#N/A	2.85e-68	Polypterus senegalus	Chordata
TRINITY_DN58878_c0_g2_i1	1283	110	XP_025761066.1	XP_025761066.1 zinc finger BED domain-containing protein 1 [Oreochromis niloticus]	#N/A	3.88e-68	Oreochromis niloticus	Chordata
TRINITY_DN58878_c0_g2_i1	1283	110	XP_026092367.1	XP_026092367.1 uncharacterized protein LOC113065358 [Carassius auratus]	#N/A	6.14e-68	Carassius auratus	Chordata
TRINITY_DN58878_c0_g2_i1	1283	110	XP_041945121.1	XP_041945121.1 E3 SUMO-protein ligase ZBED1-like [Alosa sapidissima]	#N/A	1.01e-67	Alosa sapidissima	Chordata
TRINITY_DN58878_c0_g2_i1	1283	110	XP_039596673.1	XP_039596673.1 uncharacterized protein zgc:161969 isoform X1 [Polypterus senegalus]	#N/A	1.08e-67	Polypterus senegalus	Chordata
TRINITY_DN58878_c0_g2_i1	1283	110	RXN12012.1	RXN12012.1 zinc finger BED domain-containing 1-like protein [Labeo rohita]	#N/A	3.66e-66	Labeo rohita	Chordata
TRINITY_DN58878_c0_g2_i1	1283	110	XP_028676195.1	XP_028676195.1 zinc finger BED domain-containing protein 1-like [Erpetoichthys calabaricus]	#N/A	2.67e-65	Erpetoichthys calabaricus	Chordata
TRINITY_DN58878_c0_g2_i1	1283	110	XP_025758620.1	XP_025758620.1 zinc finger BED domain-containing protein 4-like [Oreochromis niloticus]	#N/A	1.2e-64	Oreochromis niloticus	Chordata
TRINITY_DN58878_c0_g2_i1	1283	110	KAF0765560.1	KAF0765560.1 Uncharacterized protein FWK35_00020503, partial [Aphis craccivora]	#N/A	1.97e-64	Aphis craccivora	Arthropoda
TRINITY_DN58878_c0_g2_i1	1283	110	XP_014268379.2	XP_014268379.2 zinc finger BED domain-containing protein 1-like [Maylandia zebra]	#N/A	1.19e-63	Maylandia zebra	Chordata
TRINITY_DN58878_c0_g2_i1	1283	110	XP_018006743.1	XP_018006743.1 PREDICTED: uncharacterized protein LOC108664630 [Hyalella azteca]	#N/A	1.21e-63	Hyalella azteca	Arthropoda
TRINITY_DN58878_c0_g2_i1	1283	110	XP_030236682.1	XP_030236682.1 uncharacterized protein LOC115561039 [Gadus morhua]	#N/A	1.29e-63	Gadus morhua	Chordata
TRINITY_DN49971_c0_g3_i2	2283	104	XP_039279735.1	XP_039279735.1 putative nuclease HARBI1 [Nilaparvata lugens]	DDE_Tnp_4 superfamily	2.72e-102	Nilaparvata lugens	Arthropoda
TRINITY_DN49971_c0_g3_i2	2283	104	XP_021326945.1	XP_021326945.1 putative nuclease HARBI1 [Danio rerio]	DDE_Tnp_4 superfamily	3.35e-70	Danio rerio	Chordata
TRINITY_DN49971_c0_g3_i2	2283	104	XP_039626518.1	XP_039626518.1 putative nuclease HARBI1 [Polypterus senegalus]	DDE_Tnp_4 superfamily	3.56e-69	Polypterus senegalus	Chordata
TRINITY_DN49971_c0_g3_i2	2283	104	XP_039610032.1	XP_039610032.1 putative nuclease HARBI1 [Polypterus senegalus]	DDE_Tnp_4 superfamily	6.38e-69	Polypterus senegalus	Chordata
TRINITY_DN49971_c0_g3_i2	2283	104	XP_039618072.1	XP_039618072.1 putative nuclease HARBI1 [Polypterus senegalus]	DDE_Tnp_4 superfamily	1.26e-68	Polypterus senegalus	Chordata
TRINITY_DN49971_c0_g3_i2	2283	104	XP_039602252.1	XP_039602252.1 putative nuclease HARBI1 [Polypterus senegalus]	DDE_Tnp_4 superfamily	2.62e-68	Polypterus senegalus	Chordata
TRINITY_DN49971_c0_g3_i2	2283	104	XP_039618096.1	XP_039618096.1 putative nuclease HARBI1 [Polypterus senegalus]	DDE_Tnp_4 superfamily	3.65e-68	Polypterus senegalus	Chordata
TRINITY_DN49971_c0_g3_i2	2283	104	MPV02312.1	MPV02312.1 transposase [Escherichia coli]	DDE_Tnp_4 superfamily	1.46e-67	Escherichia coli	Proteobacteria
TRINITY_DN49971_c0_g3_i2	2283	104	XP_039590571.1	XP_039590571.1 putative nuclease HARBI1 [Polypterus senegalus]	DDE_Tnp_4 superfamily	2.86e-67	Polypterus senegalus	Chordata
TRINITY_DN49971_c0_g3_i2	2283	104	XP_039623583.1	XP_039623583.1 putative nuclease HARBI1 [Polypterus senegalus]	DDE_Tnp_4 superfamily	3.99e-67	Polypterus senegalus	Chordata
TRINITY_DN49971_c0_g3_i2	2283	104	XP_039620777.1	XP_039620777.1 putative nuclease HARBI1 [Polypterus senegalus]	DDE_Tnp_4 superfamily	5.57e-67	Polypterus senegalus	Chordata
TRINITY_DN49971_c0_g3_i2	2283	104	XP_039618115.1	XP_039618115.1 putative nuclease HARBI1 [Polypterus senegalus]	DDE_Tnp_4 superfamily	3.82e-66	Polypterus senegalus	Chordata
TRINITY_DN49971_c0_g3_i2	2283	104	XP_039613871.1	XP_039613871.1 putative nuclease HARBI1 [Polypterus senegalus]	DDE_Tnp_4 superfamily	7.41e-66	Polypterus senegalus	Chordata
TRINITY_DN49971_c0_g3_i2	2283	104	WP_193644639.1	WP_193644639.1 transposase [Escherichia coli]	DDE_Tnp_4 superfamily	4.92e-64	Escherichia coli	Proteobacteria
TRINITY_DN49971_c0_g3_i2	2283	104	XP_041837917.1	XP_041837917.1 putative nuclease HARBI1 [Melanotaenia boesemani]	DDE_Tnp_4 superfamily	2.06e-63	Melanotaenia boesemani	Chordata
TRINITY_DN49971_c0_g3_i2	2283	104	XP_039598426.1	XP_039598426.1 putative nuclease HARBI1 [Polypterus senegalus]	DDE_Tnp_4 superfamily	6.58e-62	Polypterus senegalus	Chordata
TRINITY_DN49971_c0_g3_i2	2283	104	XP_039608641.1	XP_039608641.1 putative nuclease HARBI1 [Polypterus senegalus]	DDE_Tnp_4 superfamily	1.63e-57	Polypterus senegalus	Chordata
TRINITY_DN49971_c0_g3_i2	2283	104	XP_039279758.1	XP_039279758.1 putative nuclease HARBI1 isoform X2 [Nilaparvata lugens]	DDE_Tnp_4 superfamily	3.23e-55	Nilaparvata lugens	Arthropoda
TRINITY_DN49971_c0_g3_i2	2283	104	XP_039279757.1	XP_039279757.1 putative nuclease HARBI1 isoform X1 [Nilaparvata lugens]	DDE_Tnp_4 superfamily	5.93e-55	Nilaparvata lugens	Arthropoda
TRINITY_DN49971_c0_g3_i2	2283	104	KAA0719755.1	KAA0719755.1 hypothetical protein E1301_Tti022785 [Triplophysa tibetana]	DDE_Tnp_4 superfamily	1.14e-53	Triplophysa tibetana	Chordata
TRINITY_DN1196_c1_g2_i2	573	100	XP_035695739.1	XP_035695739.1 collectin-10-like [Branchiostoma floridae]	CLECT	1.26e-11	Branchiostoma floridae	Chordata
TRINITY_DN1196_c1_g2_i2	573	100	XP_033027050.1	XP_033027050.1 C-type lectin-like [Lacerta agilis]	CLECT	4.52e-11	Lacerta agilis	Chordata
TRINITY_DN1196_c1_g2_i2	573	100	XP_034993078.1	XP_034993078.1 C-type lectin-like isoform X2 [Zootoca vivipara]	CLECT	6.11e-11	Zootoca vivipara	Chordata
TRINITY_DN1196_c1_g2_i2	573	100	XP_034992793.1	XP_034992793.1 regenerating islet-derived protein 4-like [Zootoca vivipara]	CLECT	7.39e-11	Zootoca vivipara	Chordata
TRINITY_DN1196_c1_g2_i2	573	100	XP_033026363.1	XP_033026363.1 C-type lectin BpLec-like [Lacerta agilis]	CLECT	8.66e-11	Lacerta agilis	Chordata
TRINITY_DN1196_c1_g2_i2	573	100	XP_028559384.1	XP_028559384.1 C-type lectin-like [Podarcis muralis]	CLECT	8.84e-11	Podarcis muralis	Chordata
TRINITY_DN1196_c1_g2_i2	573	100	XP_006128204.1	XP_006128204.1 C-type lectin BfL-2-like [Pelodiscus sinensis]	CLECT	9.14e-11	Pelodiscus sinensis	Chordata
TRINITY_DN1196_c1_g2_i2	573	100	XP_034993076.1	XP_034993076.1 C-type lectin-like isoform X1 [Zootoca vivipara]	CLECT	1.24e-10	Zootoca vivipara	Chordata
TRINITY_DN1196_c1_g2_i2	573	100	KXJ71288.1	KXJ71288.1 hypothetical protein RP20_CCG020938 [Aedes albopictus]	CLECT	2.67e-10	Aedes albopictus	Arthropoda
TRINITY_DN1196_c1_g2_i2	573	100	XP_008113676.1	XP_008113676.1 PREDICTED: C-type lectin Cal-like [Anolis carolinensis]	CLECT	2.8e-10	Anolis carolinensis	Chordata
TRINITY_DN1196_c1_g2_i2	573	100	XP_033026192.1	XP_033026192.1 regenerating islet-derived protein 4-like [Lacerta agilis]	CLECT	3.75e-10	Lacerta agilis	Chordata
TRINITY_DN1196_c1_g2_i2	573	100	XP_029140961.1	XP_029140961.1 C-type lectin Cal-like [Protobothrops mucrosquamatus]	CLECT	4.7e-10	Protobothrops mucrosquamatus	Chordata
TRINITY_DN1196_c1_g2_i2	573	100	XP_020668404.1	XP_020668404.1 C-type lectin-like [Pogona vitticeps]	CLECT	4.7e-10	Pogona vitticeps	Chordata
TRINITY_DN1196_c1_g2_i2	573	100	XP_030395797.1	XP_030395797.1 lithostathine-1-like isoform X2 [Gopherus evgoodei]	CLECT	6.53e-10	Gopherus evgoodei	Chordata
TRINITY_DN1196_c1_g2_i2	573	100	XP_034267486.1	XP_034267486.1 C-type lectin Cal-like [Pantherophis guttatus]	CLECT	6.57e-10	Pantherophis guttatus	Chordata
TRINITY_DN1196_c1_g2_i2	573	100	XP_025028431.1	XP_025028431.1 C-type lectin BpLec-like [Python bivittatus]	CLECT	9.17e-10	Python bivittatus	Chordata
TRINITY_DN1196_c1_g2_i2	573	100	XP_039270230.1	XP_039270230.1 uncharacterized protein LOC120344952 [Styela clava]	CLECT	9.76e-10	Styela clava	Chordata
TRINITY_DN1196_c1_g2_i2	573	100	XP_035697864.1	XP_035697864.1 uncharacterized protein LOC118430942 [Branchiostoma floridae]	CLECT	1.05e-09	Branchiostoma floridae	Chordata
TRINITY_DN1196_c1_g2_i2	573	100	XP_005314786.1	XP_005314786.1 lithostathine-1-like [Chrysemys picta bellii]	CLECT	1.67e-09	Chrysemys picta bellii	Chordata
TRINITY_DN1196_c1_g2_i2	573	100	XP_016850890.1	XP_016850890.1 PREDICTED: C-type lectin Cal-like isoform X2 [Anolis carolinensis]	CLECT	2.03e-09	Anolis carolinensis	Chordata
TRINITY_DN5054_c1_g1_i11	449	98	NWW42178.1	NWW42178.1 ZBT8B protein [Panurus biarmicus]	#N/A	4.58e-05	Panurus biarmicus;Pycnonotus jocosus;Alaudala cheleensis	Chordata
TRINITY_DN5054_c1_g1_i11	449	98	NWS50674.1	NWS50674.1 ZBT8B protein [Probosciger aterrimus]	#N/A	4.58e-05	Agelaius phoeniceus;Spizella passerina;Aramus guarauna;Oxylabes madagascariensis;Probosciger aterrimus;Pheucticus melanocephalus	Chordata
TRINITY_DN5054_c1_g1_i11	449	98	NXU59846.1	NXU59846.1 ZBT8B protein [Turnix velox]	#N/A	4.58e-05	Turnix velox	Chordata
TRINITY_DN5054_c1_g1_i11	449	98	KFM81296.1	KFM81296.1 Zinc finger and BTB domain-containing protein 46, partial [Stegodyphus mimosarum]	#N/A	4.96e-05	Stegodyphus mimosarum	Arthropoda
TRINITY_DN5054_c1_g1_i11	449	98	NXI06486.1	NXI06486.1 ZBT8B protein [Pachycephala philippinensis]	#N/A	6.6e-05	Pachycephala philippinensis	Chordata
TRINITY_DN5054_c1_g1_i11	449	98	NWX55788.1	NWX55788.1 ZBT8B protein [Promerops cafer]	#N/A	7.08e-05	Promerops cafer	Chordata
TRINITY_DN15793_c0_g1_i19	1019	98	XP_039279735.1	XP_039279735.1 putative nuclease HARBI1 [Nilaparvata lugens]	#N/A	2.44e-32	Nilaparvata lugens	Arthropoda
TRINITY_DN15793_c0_g1_i19	1019	98	XP_041837917.1	XP_041837917.1 putative nuclease HARBI1 [Melanotaenia boesemani]	#N/A	4.21e-16	Melanotaenia boesemani	Chordata
TRINITY_DN15793_c0_g1_i19	1019	98	XP_021326945.1	XP_021326945.1 putative nuclease HARBI1 [Danio rerio]	#N/A	1.06e-15	Danio rerio	Chordata
TRINITY_DN15793_c0_g1_i19	1019	98	ROL52987.1	ROL52987.1 Protein ANTAGONIST OF LIKE HETEROCHROMATIN PROTEIN 1 [Anabarilius grahami]	#N/A	2.13e-15	Anabarilius grahami	Chordata
TRINITY_DN15793_c0_g1_i19	1019	98	XP_039618072.1	XP_039618072.1 putative nuclease HARBI1 [Polypterus senegalus]	#N/A	4.04e-15	Polypterus senegalus	Chordata
TRINITY_DN15793_c0_g1_i19	1019	98	RXN33043.1	RXN33043.1 nuclease HARBI1 [Labeo rohita]	#N/A	4.16e-15	Labeo rohita	Chordata
TRINITY_DN15793_c0_g1_i19	1019	98	XP_039590571.1	XP_039590571.1 putative nuclease HARBI1 [Polypterus senegalus]	#N/A	5.56e-15	Polypterus senegalus	Chordata
TRINITY_DN15793_c0_g1_i19	1019	98	XP_039608641.1	XP_039608641.1 putative nuclease HARBI1 [Polypterus senegalus]	#N/A	5.77e-15	Polypterus senegalus	Chordata
TRINITY_DN15793_c0_g1_i19	1019	98	XP_039602252.1	XP_039602252.1 putative nuclease HARBI1 [Polypterus senegalus]	#N/A	9.42e-15	Polypterus senegalus	Chordata
TRINITY_DN15793_c0_g1_i19	1019	98	XP_039618096.1	XP_039618096.1 putative nuclease HARBI1 [Polypterus senegalus]	#N/A	9.42e-15	Polypterus senegalus	Chordata
TRINITY_DN15793_c0_g1_i19	1019	98	XP_039626518.1	XP_039626518.1 putative nuclease HARBI1 [Polypterus senegalus]	#N/A	9.42e-15	Polypterus senegalus	Chordata
TRINITY_DN15793_c0_g1_i19	1019	98	XP_039610032.1	XP_039610032.1 putative nuclease HARBI1 [Polypterus senegalus]	#N/A	1.21e-14	Polypterus senegalus	Chordata
TRINITY_DN15793_c0_g1_i19	1019	98	XP_039623583.1	XP_039623583.1 putative nuclease HARBI1 [Polypterus senegalus]	#N/A	1.41e-14	Polypterus senegalus	Chordata
TRINITY_DN15793_c0_g1_i19	1019	98	XP_039620777.1	XP_039620777.1 putative nuclease HARBI1 [Polypterus senegalus]	#N/A	2.63e-14	Polypterus senegalus	Chordata
TRINITY_DN15793_c0_g1_i19	1019	98	WP_193644639.1	WP_193644639.1 transposase [Escherichia coli]	#N/A	4.57e-14	Escherichia coli	Proteobacteria
TRINITY_DN15793_c0_g1_i19	1019	98	KAA0719755.1	KAA0719755.1 hypothetical protein E1301_Tti022785 [Triplophysa tibetana]	#N/A	5.22e-14	Triplophysa tibetana	Chordata
TRINITY_DN15793_c0_g1_i19	1019	98	MPV02312.1	MPV02312.1 transposase [Escherichia coli]	#N/A	6.12e-14	Escherichia coli	Proteobacteria
TRINITY_DN15793_c0_g1_i19	1019	98	XP_039613871.1	XP_039613871.1 putative nuclease HARBI1 [Polypterus senegalus]	#N/A	1.11e-13	Polypterus senegalus	Chordata
TRINITY_DN15793_c0_g1_i19	1019	98	XP_039618115.1	XP_039618115.1 putative nuclease HARBI1 [Polypterus senegalus]	#N/A	3.78e-13	Polypterus senegalus	Chordata
TRINITY_DN15793_c0_g1_i19	1019	98	KAB0803790.1	KAB0803790.1 hypothetical protein PPYR_00760 [Photinus pyralis]	#N/A	1.56e-11	Photinus pyralis	Arthropoda
TRINITY_DN2492_c0_g1_i4	503	94	KAG7262015.1	KAG7262015.1 hypothetical protein CRUP_026654 [Coryphaenoides rupestris]	#N/A	4.4e-24	Coryphaenoides rupestris	Chordata
TRINITY_DN2492_c0_g1_i4	503	94	XP_025122593.1	XP_025122593.1 tetratricopeptide repeat protein 36 isoform X2 [Bubalus bubalis]	#N/A	3.62e-23	Bubalus bubalis	Chordata
TRINITY_DN2492_c0_g1_i4	503	94	XP_023576966.1	XP_023576966.1 tetratricopeptide repeat protein 36 isoform X2 [Octodon degus]	#N/A	3.62e-23	Octodon degus	Chordata
TRINITY_DN2492_c0_g1_i4	503	94	XP_027419395.1	XP_027419395.1 tetratricopeptide repeat protein 36 isoform X2 [Bos indicus x Bos taurus]	#N/A	7.25e-23	Bos indicus x Bos taurus	Chordata
TRINITY_DN2492_c0_g1_i4	503	94	XP_014287923.1	XP_014287923.1 tetratricopeptide repeat protein 36 [Halyomorpha halys]	#N/A	3.97e-22	Halyomorpha halys	Arthropoda
TRINITY_DN2492_c0_g1_i4	503	94	GFG29980.1	GFG29980.1 hypothetical protein Cfor_11762 [Coptotermes formosanus]	#N/A	4.72e-22	Coptotermes formosanus	Arthropoda
TRINITY_DN2492_c0_g1_i4	503	94	CAG5090151.1	CAG5090151.1 Similar to Ttc36: Tetratricopeptide repeat protein 36 (Rattus norvegicus) [Cotesia congregata]	#N/A	4.91e-22	Cotesia congregata	Arthropoda
TRINITY_DN2492_c0_g1_i4	503	94	KAF6210020.1	KAF6210020.1 hypothetical protein [Apolygus lucorum]	#N/A	5.54e-22	Apolygus lucorum	Arthropoda
TRINITY_DN2492_c0_g1_i4	503	94	XP_019830324.1	XP_019830324.1 PREDICTED: tetratricopeptide repeat protein 36 isoform X2 [Bos indicus]	#N/A	5.79e-22	Bos indicus	Chordata
TRINITY_DN2492_c0_g1_i4	503	94	XP_042237099.1	XP_042237099.1 tetratricopeptide repeat protein 36 homolog [Homarus americanus]	#N/A	6.99e-22	Homarus americanus	Arthropoda
TRINITY_DN2492_c0_g1_i4	503	94	XP_023333366.1	XP_023333366.1 tetratricopeptide repeat protein 36 homolog [Eurytemora affinis]	#N/A	2.32e-21	Eurytemora affinis	Arthropoda
TRINITY_DN2492_c0_g1_i4	503	94	XP_037789671.1	XP_037789671.1 tetratricopeptide repeat protein 36 homolog [Penaeus monodon]	#N/A	2.76e-21	Penaeus monodon	Arthropoda
TRINITY_DN2492_c0_g1_i4	503	94	VDM54268.1	VDM54268.1 unnamed protein product [Angiostrongylus costaricensis]	#N/A	5.02e-21	Angiostrongylus costaricensis	Nematoda
TRINITY_DN2492_c0_g1_i4	503	94	KAG8284028.1	KAG8284028.1 Tetratricopeptide repeat protein 36 [Homalodisca vitripennis]	#N/A	5.35e-21	Homalodisca vitripennis	Arthropoda
TRINITY_DN2492_c0_g1_i4	503	94	XP_014256650.1	XP_014256650.1 tetratricopeptide repeat protein 36 homolog [Cimex lectularius]	#N/A	5.67e-21	Cimex lectularius	Arthropoda
TRINITY_DN2492_c0_g1_i4	503	94	XP_002734805.1	XP_002734805.1 PREDICTED: tetratricopeptide repeat protein 36-like isoform 2 [Saccoglossus kowalevskii]	#N/A	8.92e-21	Saccoglossus kowalevskii	Hemichordata
TRINITY_DN2492_c0_g1_i4	503	94	KFP05516.1	KFP05516.1 Tetratricopeptide repeat protein 36, partial [Calypte anna]	#N/A	9.25e-21	Calypte anna	Chordata
TRINITY_DN2492_c0_g1_i4	503	94	XP_027222888.1	XP_027222888.1 tetratricopeptide repeat protein 36 homolog [Penaeus vannamei]	#N/A	1.09e-20	Penaeus vannamei	Arthropoda
TRINITY_DN2492_c0_g1_i4	503	94	TRY75778.1	TRY75778.1 hypothetical protein TCAL_07025 [Tigriopus californicus]	#N/A	1.15e-20	Tigriopus californicus	Arthropoda
TRINITY_DN2492_c0_g1_i4	503	94	XP_023703091.1	XP_023703091.1 tetratricopeptide repeat protein 36 [Cryptotermes secundus]	#N/A	1.46e-20	Cryptotermes secundus	Arthropoda
TRINITY_DN6981_c0_g1_i1	1275	94	KAG8330395.1	KAG8330395.1 Radical S-adenosyl methionine domain-containing protein 2 [Homalodisca vitripennis]	viperin superfamily	1.5e-180	Homalodisca vitripennis	Arthropoda
TRINITY_DN6981_c0_g1_i1	1275	94	XP_018539500.1	XP_018539500.1 PREDICTED: radical S-adenosyl methionine domain-containing protein 2 [Lates calcarifer]	viperin superfamily	2.9e-161	Lates calcarifer	Chordata
TRINITY_DN6981_c0_g1_i1	1275	94	RXN19096.1	RXN19096.1 radical S-adenosyl methionine domain-containing 2 [Labeo rohita]	viperin superfamily	7.53e-161	Labeo rohita	Chordata
TRINITY_DN6981_c0_g1_i1	1275	94	XP_033967285.1	XP_033967285.1 radical S-adenosyl methionine domain-containing protein 2 [Pseudochaenichthys georgianus]	viperin superfamily	2.63e-160	Pseudochaenichthys georgianus	Chordata
TRINITY_DN6981_c0_g1_i1	1275	94	XP_039641189.1	XP_039641189.1 radical S-adenosyl methionine domain-containing protein 2 [Perca fluviatilis]	viperin superfamily	3.01e-160	Perca fluviatilis	Chordata
TRINITY_DN6981_c0_g1_i1	1275	94	XP_033969287.1	XP_033969287.1 radical S-adenosyl methionine domain-containing protein 2 [Trematomus bernacchii]	viperin superfamily	3.73e-160	Trematomus bernacchii	Chordata
TRINITY_DN6981_c0_g1_i1	1275	94	XP_030248222.1	XP_030248222.1 radical S-adenosyl methionine domain-containing protein 2 [Sparus aurata]	viperin superfamily	4.75e-160	Sparus aurata	Chordata
TRINITY_DN6981_c0_g1_i1	1275	94	KAF3701161.1	KAF3701161.1 Radical S-adenosyl methionine domain-containing protein 2 [Channa argus]	viperin superfamily	4.97e-160	Channa argus	Chordata
TRINITY_DN6981_c0_g1_i1	1275	94	ABO48449.1	ABO48449.1 viperin [Coreoperca whiteheadi]	viperin superfamily	5.29e-160	Coreoperca whiteheadi	Chordata
TRINITY_DN6981_c0_g1_i1	1275	94	XP_041668896.1	XP_041668896.1 radical S-adenosyl methionine domain-containing protein 2 [Cheilinus undulatus]	viperin superfamily	5.48e-160	Cheilinus undulatus	Chordata
TRINITY_DN6981_c0_g1_i1	1275	94	XP_028422235.1	XP_028422235.1 radical S-adenosyl methionine domain-containing protein 2 [Perca flavescens]	viperin superfamily	6.06e-160	Perca flavescens	Chordata
TRINITY_DN6981_c0_g1_i1	1275	94	KAG7224205.1	KAG7224205.1 hypothetical protein INR49_019940 [Caranx melampygus]	viperin superfamily	8.91e-160	Caranx melampygus	Chordata
TRINITY_DN6981_c0_g1_i1	1275	94	XP_036980977.1	XP_036980977.1 radical S-adenosyl methionine domain-containing protein 2 [Acanthopagrus latus]	viperin superfamily	9.56e-160	Acanthopagrus latus	Chordata
TRINITY_DN6981_c0_g1_i1	1275	94	XP_042243723.1	XP_042243723.1 radical S-adenosyl methionine domain-containing protein 2 [Thunnus maccoyii]	viperin superfamily	1.03e-159	Thunnus maccoyii	Chordata
TRINITY_DN6981_c0_g1_i1	1275	94	AAW82780.2	AAW82780.2 viperin-like protein [Channa argus]	viperin superfamily	1.41e-159	Channa argus	Chordata
TRINITY_DN6981_c0_g1_i1	1275	94	XP_034078249.1	XP_034078249.1 radical S-adenosyl methionine domain-containing protein 2 [Gymnodraco acuticeps]	viperin superfamily	1.51e-159	Gymnodraco acuticeps	Chordata
TRINITY_DN6981_c0_g1_i1	1275	94	KAG8013343.1	KAG8013343.1 Radical S-adenosyl methionine domain-containing protein 2, partial [Nibea albiflora]	viperin superfamily	1.9e-159	Nibea albiflora	Chordata
TRINITY_DN6981_c0_g1_i1	1275	94	XP_028251141.1	XP_028251141.1 radical S-adenosyl methionine domain-containing protein 2 [Parambassis ranga]	viperin superfamily	2.63e-159	Parambassis ranga	Chordata
TRINITY_DN6981_c0_g1_i1	1275	94	ACH87133.1	ACH87133.1 viperin [Epinephelus coioides]	viperin superfamily	2.74e-159	Epinephelus coioides	Chordata
TRINITY_DN6981_c0_g1_i1	1275	94	XP_037551462.1	XP_037551462.1 radical S-adenosyl methionine domain-containing protein 2 [Nematolebias whitei]	viperin superfamily	2.81e-159	Nematolebias whitei	Chordata
TRINITY_DN80_c1_g2_i1	997	92	NXU74590.1	NXU74590.1 MRC1 protein [Oreotrochilus melanogaster]	CLECT	3.19e-09	Oreotrochilus melanogaster	Chordata
TRINITY_DN80_c1_g2_i1	997	92	NXS00842.1	NXS00842.1 MRC1 protein [Oxylabes madagascariensis]	CLECT	3.31e-09	Oxylabes madagascariensis	Chordata
TRINITY_DN80_c1_g2_i1	997	92	XP_030302374.1	XP_030302374.1 macrophage mannose receptor 1 [Calypte anna]	CLECT	4.04e-09	Calypte anna	Chordata
TRINITY_DN80_c1_g2_i1	997	92	NXG27125.1	NXG27125.1 MRC1 protein [Dromaius novaehollandiae]	CLECT	4.28e-09	Dromaius novaehollandiae	Chordata
TRINITY_DN80_c1_g2_i1	997	92	XP_025954589.1	XP_025954589.1 macrophage mannose receptor 1-like [Dromaius novaehollandiae]	CLECT	5.41e-09	Dromaius novaehollandiae	Chordata
TRINITY_DN80_c1_g2_i1	997	92	XP_006825556.1	XP_006825556.1 PREDICTED: uncharacterized protein LOC100372748 [Saccoglossus kowalevskii]	CLECT	6.02e-09	Saccoglossus kowalevskii	Hemichordata
TRINITY_DN80_c1_g2_i1	997	92	XP_010175984.1	XP_010175984.1 macrophage mannose receptor 1, partial [Antrostomus carolinensis]	CLECT	2.87e-08	Antrostomus carolinensis	Chordata
TRINITY_DN80_c1_g2_i1	997	92	NWQ88492.1	NWQ88492.1 MRC1 protein [Burhinus bistriatus]	CLECT	4.36e-08	Burhinus bistriatus	Chordata
TRINITY_DN80_c1_g2_i1	997	92	NXX76411.1	NXX76411.1 MRC1 protein [Urocolius indicus]	CLECT	4.37e-08	Urocolius indicus	Chordata
TRINITY_DN80_c1_g2_i1	997	92	XP_009909878.1	XP_009909878.1 PREDICTED: macrophage mannose receptor 1-like [Dryobates pubescens]	CLECT	5.37e-08	Dryobates pubescens	Chordata
TRINITY_DN80_c1_g2_i1	997	92	XP_019614795.1	XP_019614795.1 PREDICTED: IgGFc-binding protein-like [Branchiostoma belcheri]	CLECT	7.61e-08	Branchiostoma belcheri	Chordata
TRINITY_DN80_c1_g2_i1	997	92	NWU97747.1	NWU97747.1 MRC1 protein [Upupa epops]	CLECT	7.79e-08	Upupa epops	Chordata
TRINITY_DN80_c1_g2_i1	997	92	NXS50093.1	NXS50093.1 MRC1 protein [Balaeniceps rex]	CLECT	7.84e-08	Balaeniceps rex	Chordata
TRINITY_DN80_c1_g2_i1	997	92	XP_027025198.1	XP_027025198.1 collectin-12-like isoform X2 [Tachysurus fulvidraco]	CLECT	8.31e-08	Tachysurus fulvidraco	Chordata
TRINITY_DN80_c1_g2_i1	997	92	XP_027025197.1	XP_027025197.1 collectin-12-like isoform X1 [Tachysurus fulvidraco]	CLECT	8.33e-08	Tachysurus fulvidraco	Chordata
TRINITY_DN80_c1_g2_i1	997	92	XP_026181160.1	XP_026181160.1 ladderlectin-like isoform X2 [Mastacembelus armatus]	CLECT	8.56e-08	Mastacembelus armatus	Chordata
TRINITY_DN80_c1_g2_i1	997	92	XP_010130689.1	XP_010130689.1 PREDICTED: macrophage mannose receptor 1-like, partial [Buceros rhinoceros silvestris]	CLECT	9.51e-08	Buceros rhinoceros silvestris	Chordata
TRINITY_DN80_c1_g2_i1	997	92	XP_009671983.1	XP_009671983.1 PREDICTED: LOW QUALITY PROTEIN: macrophage mannose receptor 1-like [Struthio camelus australis]	CLECT	9.74e-08	Struthio camelus australis	Chordata
TRINITY_DN80_c1_g2_i1	997	92	XP_020634878.1	XP_020634878.1 hepatic lectin-like [Pogona vitticeps]	CLECT	9.96e-08	Pogona vitticeps	Chordata
TRINITY_DN80_c1_g2_i1	997	92	KFP00022.1	KFP00022.1 Macrophage mannose receptor 1, partial [Calypte anna]	CLECT	1e-07	Calypte anna	Chordata
TRINITY_DN54570_c1_g1_i3	1417	92	XP_039623906.1	XP_039623906.1 jerky protein homolog-like [Polypterus senegalus]	rve superfamily	1.78e-96	Polypterus senegalus	Chordata
TRINITY_DN54570_c1_g1_i3	1417	92	XP_039613929.1	XP_039613929.1 jerky protein homolog-like [Polypterus senegalus]	rve superfamily	3.77e-96	Polypterus senegalus	Chordata
TRINITY_DN54570_c1_g1_i3	1417	92	XP_039608836.1	XP_039608836.1 jerky protein homolog-like [Polypterus senegalus]	rve superfamily	4.86e-96	Polypterus senegalus	Chordata
TRINITY_DN54570_c1_g1_i3	1417	92	XP_028649317.1	XP_028649317.1 jerky protein homolog-like [Erpetoichthys calabaricus]	rve superfamily	7.08e-96	Erpetoichthys calabaricus	Chordata
TRINITY_DN54570_c1_g1_i3	1417	92	XP_028674343.1	XP_028674343.1 jerky protein homolog-like [Erpetoichthys calabaricus]	rve superfamily	8.41e-96	Erpetoichthys calabaricus	Chordata
TRINITY_DN54570_c1_g1_i3	1417	92	XP_028649015.1	XP_028649015.1 jerky protein homolog-like [Erpetoichthys calabaricus]	rve superfamily	2.42e-95	Erpetoichthys calabaricus	Chordata
TRINITY_DN54570_c1_g1_i3	1417	92	XP_028665263.1	XP_028665263.1 jerky protein homolog-like [Erpetoichthys calabaricus]	rve superfamily	3.9e-95	Erpetoichthys calabaricus	Chordata
TRINITY_DN54570_c1_g1_i3	1417	92	KAG2469150.1	KAG2469150.1 JERKL protein, partial [Polypterus senegalus]	rve superfamily	8.17e-95	Polypterus senegalus	Chordata
TRINITY_DN54570_c1_g1_i3	1417	92	XP_039618076.1	XP_039618076.1 jerky protein homolog-like [Polypterus senegalus]	rve superfamily	1.31e-94	Polypterus senegalus	Chordata
TRINITY_DN54570_c1_g1_i3	1417	92	XP_028669261.1	XP_028669261.1 jerky protein homolog-like [Erpetoichthys calabaricus]	rve superfamily	1.51e-94	Erpetoichthys calabaricus	Chordata
TRINITY_DN54570_c1_g1_i3	1417	92	XP_028648386.1	XP_028648386.1 jerky protein homolog-like [Erpetoichthys calabaricus]	rve superfamily	1.8e-94	Erpetoichthys calabaricus	Chordata
TRINITY_DN54570_c1_g1_i3	1417	92	XP_028681081.1	XP_028681081.1 jerky protein homolog-like [Erpetoichthys calabaricus]	rve superfamily	3.68e-94	Erpetoichthys calabaricus	Chordata
TRINITY_DN54570_c1_g1_i3	1417	92	XP_028664086.1	XP_028664086.1 jerky protein homolog-like [Erpetoichthys calabaricus]	rve superfamily	5.18e-94	Erpetoichthys calabaricus	Chordata
TRINITY_DN54570_c1_g1_i3	1417	92	XP_028674359.1	XP_028674359.1 jerky protein homolog-like [Erpetoichthys calabaricus]	rve superfamily	7.51e-94	Erpetoichthys calabaricus	Chordata
TRINITY_DN54570_c1_g1_i3	1417	92	XP_039623936.1	XP_039623936.1 jerky protein homolog-like [Polypterus senegalus]	rve superfamily	1.67e-93	Polypterus senegalus	Chordata
TRINITY_DN54570_c1_g1_i3	1417	92	XP_028665335.1	XP_028665335.1 jerky protein homolog-like [Erpetoichthys calabaricus]	rve superfamily	2.05e-93	Erpetoichthys calabaricus	Chordata
TRINITY_DN54570_c1_g1_i3	1417	92	XP_028666359.1	XP_028666359.1 jerky protein homolog-like [Erpetoichthys calabaricus]	rve superfamily	3.14e-93	Erpetoichthys calabaricus	Chordata
TRINITY_DN54570_c1_g1_i3	1417	92	XP_028676127.1	XP_028676127.1 jerky protein homolog-like [Erpetoichthys calabaricus]	rve superfamily	5.02e-93	Erpetoichthys calabaricus	Chordata
TRINITY_DN54570_c1_g1_i3	1417	92	XP_028660442.1	XP_028660442.1 jerky protein homolog-like [Erpetoichthys calabaricus]	rve superfamily	5.73e-93	Erpetoichthys calabaricus	Chordata
TRINITY_DN54570_c1_g1_i3	1417	92	XP_028674275.1	XP_028674275.1 jerky protein homolog-like [Erpetoichthys calabaricus]	rve superfamily	2.5e-91	Erpetoichthys calabaricus	Chordata
TRINITY_DN6639_c0_g1_i7	1406	92	KAE8589530.1	KAE8589530.1 hypothetical protein XENTR_v10017602 [Xenopus tropicalis]	DDHD superfamily	4.25e-16	Xenopus tropicalis	Chordata
TRINITY_DN6639_c0_g1_i7	1406	92	PSN51111.1	PSN51111.1 hypothetical protein C0J52_07975 [Blattella germanica]	DDHD superfamily	4.59e-15	Blattella germanica	Arthropoda
TRINITY_DN6639_c0_g1_i7	1406	92	XP_031696626.1	XP_031696626.1 phospholipase DDHD2-like, partial [Anarrhichthys ocellatus]	DDHD superfamily	1.09e-14	Anarrhichthys ocellatus	Chordata
TRINITY_DN6639_c0_g1_i7	1406	92	XP_041337271.1	XP_041337271.1 SEC23-interacting protein-like, partial [Pyrgilauda ruficollis]	DDHD superfamily	1.69e-14	Pyrgilauda ruficollis	Chordata
TRINITY_DN6639_c0_g1_i7	1406	92	XP_008280236.1	XP_008280236.1 PREDICTED: phospholipase DDHD2 isoform X2 [Stegastes partitus]	DDHD superfamily	1.77e-14	Stegastes partitus	Chordata
TRINITY_DN6639_c0_g1_i7	1406	92	XP_008280235.1	XP_008280235.1 PREDICTED: phospholipase DDHD2 isoform X1 [Stegastes partitus]	DDHD superfamily	1.77e-14	Stegastes partitus	Chordata
TRINITY_DN6639_c0_g1_i7	1406	92	AWP07004.1	AWP07004.1 putative phospholipase DDHD2 [Scophthalmus maximus]	DDHD superfamily	2.35e-14	Scophthalmus maximus	Chordata
TRINITY_DN6639_c0_g1_i7	1406	92	XP_035496425.1	XP_035496425.1 phospholipase DDHD2 isoform X2 [Scophthalmus maximus]	DDHD superfamily	2.48e-14	Scophthalmus maximus	Chordata
TRINITY_DN6639_c0_g1_i7	1406	92	KAE8589526.1	KAE8589526.1 hypothetical protein XENTR_v10017602 [Xenopus tropicalis]	DDHD superfamily	3.15e-14	Xenopus tropicalis	Chordata
TRINITY_DN6639_c0_g1_i7	1406	92	KAG8435802.1	KAG8435802.1 hypothetical protein GDO86_013661 [Hymenochirus boettgeri]	DDHD superfamily	3.49e-14	Hymenochirus boettgeri	Chordata
TRINITY_DN6639_c0_g1_i7	1406	92	KAG8435801.1	KAG8435801.1 hypothetical protein GDO86_013661 [Hymenochirus boettgeri]	DDHD superfamily	3.63e-14	Hymenochirus boettgeri	Chordata
TRINITY_DN6639_c0_g1_i7	1406	92	NP_001121519.1	NP_001121519.1 SEC23-interacting protein [Xenopus tropicalis]	DDHD superfamily	3.63e-14	Xenopus tropicalis	Chordata
TRINITY_DN6639_c0_g1_i7	1406	92	KAG8435800.1	KAG8435800.1 hypothetical protein GDO86_013661 [Hymenochirus boettgeri]	DDHD superfamily	3.63e-14	Hymenochirus boettgeri	Chordata
TRINITY_DN6639_c0_g1_i7	1406	92	XP_031760726.1	XP_031760726.1 SEC23-interacting protein isoform X1 [Xenopus tropicalis]	DDHD superfamily	3.64e-14	Xenopus tropicalis	Chordata
TRINITY_DN6639_c0_g1_i7	1406	92	XP_035496426.1	XP_035496426.1 phospholipase DDHD2 isoform X3 [Scophthalmus maximus]	DDHD superfamily	4.28e-14	Scophthalmus maximus	Chordata
TRINITY_DN6639_c0_g1_i7	1406	92	XP_035496424.1	XP_035496424.1 phospholipase DDHD2 isoform X1 [Scophthalmus maximus]	DDHD superfamily	4.49e-14	Scophthalmus maximus	Chordata
TRINITY_DN6639_c0_g1_i7	1406	92	KAG7490028.1	KAG7490028.1 phospholipase DDHD2 isoform X1 [Solea senegalensis]	DDHD superfamily	5.51e-14	Solea senegalensis	Chordata
TRINITY_DN6639_c0_g1_i7	1406	92	XP_020776575.1	XP_020776575.1 phospholipase DDHD2 [Boleophthalmus pectinirostris]	DDHD superfamily	5.54e-14	Boleophthalmus pectinirostris	Chordata
TRINITY_DN6639_c0_g1_i7	1406	92	KAG7490027.1	KAG7490027.1 phospholipase DDHD2 isoform X1 [Solea senegalensis]	DDHD superfamily	5.56e-14	Solea senegalensis	Chordata
TRINITY_DN6639_c0_g1_i7	1406	92	PNF41924.1	PNF41924.1 Phospholipase DDHD2 [Cryptotermes secundus]	DDHD superfamily	5.63e-14	Cryptotermes secundus	Arthropoda
TRINITY_DN6689_c2_g1_i2	781	86	XP_023251225.1	XP_023251225.1 zinc finger BED domain-containing protein 5-like [Seriola lalandi dorsalis]	#N/A	1.25e-81	Seriola lalandi dorsalis	Chordata
TRINITY_DN6689_c2_g1_i2	781	86	XP_030272781.1	XP_030272781.1 zinc finger BED domain-containing protein 5 [Sparus aurata]	#N/A	2.17e-78	Sparus aurata	Chordata
TRINITY_DN6689_c2_g1_i2	781	86	XP_042073623.1	XP_042073623.1 zinc finger BED domain-containing protein 5-like [Haplochromis burtoni]	#N/A	1.1e-75	Haplochromis burtoni	Chordata
TRINITY_DN6689_c2_g1_i2	781	86	XP_031330321.1	XP_031330321.1 zinc finger BED domain-containing protein 5-like [Photinus pyralis]	#N/A	1.17e-75	Photinus pyralis	Arthropoda
TRINITY_DN6689_c2_g1_i2	781	86	XP_042077972.1	XP_042077972.1 zinc finger BED domain-containing protein 5-like [Haplochromis burtoni]	#N/A	1.52e-75	Haplochromis burtoni	Chordata
TRINITY_DN6689_c2_g1_i2	781	86	XP_042072267.1	XP_042072267.1 zinc finger BED domain-containing protein 5-like [Haplochromis burtoni]	#N/A	7.58e-75	Haplochromis burtoni	Chordata
TRINITY_DN6689_c2_g1_i2	781	86	XP_014339928.1	XP_014339928.1 PREDICTED: zinc finger BED domain-containing protein 5-like, partial [Latimeria chalumnae]	#N/A	9.9e-75	Latimeria chalumnae	Chordata
TRINITY_DN6689_c2_g1_i2	781	86	XP_042071388.1	XP_042071388.1 zinc finger BED domain-containing protein 5-like [Haplochromis burtoni]	#N/A	2.51e-74	Haplochromis burtoni	Chordata
TRINITY_DN6689_c2_g1_i2	781	86	XP_014339944.1	XP_014339944.1 PREDICTED: LOW QUALITY PROTEIN: zinc finger BED domain-containing protein 5-like [Latimeria chalumnae]	#N/A	9.69e-74	Latimeria chalumnae	Chordata
TRINITY_DN6689_c2_g1_i2	781	86	XP_006005906.1	XP_006005906.1 PREDICTED: zinc finger BED domain-containing protein 5-like [Latimeria chalumnae]	#N/A	1.96e-73	Latimeria chalumnae	Chordata
TRINITY_DN6689_c2_g1_i2	781	86	XP_017210640.2	XP_017210640.2 LOW QUALITY PROTEIN: zinc finger BED domain-containing protein 5-like [Danio rerio]	#N/A	4.42e-73	Danio rerio	Chordata
TRINITY_DN6689_c2_g1_i2	781	86	XP_035277215.1	XP_035277215.1 zinc finger BED domain-containing protein 5 [Anguilla anguilla]	#N/A	8.15e-73	Anguilla anguilla	Chordata
TRINITY_DN6689_c2_g1_i2	781	86	XP_025761510.1	XP_025761510.1 zinc finger BED domain-containing protein 5-like isoform X2 [Oreochromis niloticus]	#N/A	1.01e-72	Oreochromis niloticus	Chordata
TRINITY_DN6689_c2_g1_i2	781	86	XP_025761508.1	XP_025761508.1 zinc finger BED domain-containing protein 5-like isoform X1 [Oreochromis niloticus]	#N/A	1.5e-72	Oreochromis niloticus	Chordata
TRINITY_DN6689_c2_g1_i2	781	86	XP_042073490.1	XP_042073490.1 zinc finger BED domain-containing protein 5-like [Haplochromis burtoni]	#N/A	1.65e-72	Haplochromis burtoni	Chordata
TRINITY_DN6689_c2_g1_i2	781	86	XP_026074775.1	XP_026074775.1 zinc finger BED domain-containing protein 5-like [Carassius auratus]	#N/A	2.25e-72	Carassius auratus	Chordata
TRINITY_DN6689_c2_g1_i2	781	86	XP_025761507.1	XP_025761507.1 zinc finger BED domain-containing protein 5-like [Oreochromis niloticus]	#N/A	7.83e-72	Oreochromis niloticus	Chordata
TRINITY_DN6689_c2_g1_i2	781	86	XP_026128810.1	XP_026128810.1 zinc finger BED domain-containing protein 5-like [Carassius auratus]	#N/A	2.49e-71	Carassius auratus	Chordata
TRINITY_DN6689_c2_g1_i2	781	86	XP_026126532.1	XP_026126532.1 zinc finger BED domain-containing protein 5-like [Carassius auratus]	#N/A	9.3e-71	Carassius auratus	Chordata
TRINITY_DN6689_c2_g1_i2	781	86	XP_015907822.1	XP_015907822.1 zinc finger BED domain-containing protein 5-like [Parasteatoda tepidariorum]	#N/A	1.48e-70	Parasteatoda tepidariorum	Arthropoda
TRINITY_DN868_c0_g2_i1	890	84	KAG8313452.1	KAG8313452.1 Heat shock- 70 kDa protein 2 [Homalodisca vitripennis]	PTZ00009 superfamily	8.2e-141	Homalodisca vitripennis	Arthropoda
TRINITY_DN868_c0_g2_i1	890	84	AAL14448.1	AAL14448.1 heat shock protein Hsc70t, partial [Mus musculus]	PTZ00009 superfamily	2.7e-119	Mus musculus	Chordata
TRINITY_DN868_c0_g2_i1	890	84	KAF1611075.1	KAF1611075.1 Heat shock-related 70 kDa protein 2, partial [Eudyptes pachyrhynchus]	PTZ00009 superfamily	3.74e-119	Eudyptes pachyrhynchus	Chordata
TRINITY_DN868_c0_g2_i1	890	84	XP_037003952.1	XP_037003952.1 heat shock 70 kDa protein cognate 4-like, partial [Artibeus jamaicensis]	PTZ00009 superfamily	1.83e-118	Artibeus jamaicensis	Chordata
TRINITY_DN868_c0_g2_i1	890	84	XP_001492044.1	XP_001492044.1 heat shock 70 kDa protein 1-like [Equus caballus]	PTZ00009 superfamily	3.54e-118	Equus caballus;Equus przewalskii	Chordata
TRINITY_DN868_c0_g2_i1	890	84	XP_037007196.1	XP_037007196.1 heat shock 70 kDa protein cognate 4 isoform X2 [Artibeus jamaicensis]	PTZ00009 superfamily	3.8e-118	Artibeus jamaicensis	Chordata
TRINITY_DN868_c0_g2_i1	890	84	ROT62014.1	ROT62014.1 heat shock protein 70 kDa [Penaeus vannamei]	PTZ00009 superfamily	5.45e-118	Penaeus vannamei	Arthropoda
TRINITY_DN868_c0_g2_i1	890	84	BAG64898.1	BAG64898.1 unnamed protein product [Homo sapiens]	PTZ00009 superfamily	6.71e-118	Homo sapiens	Chordata
TRINITY_DN868_c0_g2_i1	890	84	KRZ21231.1	KRZ21231.1 Heat shock 70 kDa protein, partial [Trichinella pseudospiralis]	PTZ00009 superfamily	1.01e-117	Trichinella pseudospiralis	Nematoda
TRINITY_DN868_c0_g2_i1	890	84	KAG7472524.1	KAG7472524.1 hypothetical protein MATL_G00109670 [Megalops atlanticus]	PTZ00009 superfamily	1.02e-117	Megalops atlanticus	Chordata
TRINITY_DN868_c0_g2_i1	890	84	KTF85564.1	KTF85564.1 hypothetical protein cypCar_00012415 [Cyprinus carpio]	PTZ00009 superfamily	1.02e-117	Cyprinus carpio	Chordata
TRINITY_DN868_c0_g2_i1	890	84	AYD37991.1	AYD37991.1 hsc70-4 [Trichogramma chilonis]	PTZ00009 superfamily	1.89e-117	Trichogramma chilonis;Trichogramma brassicae	Arthropoda
TRINITY_DN868_c0_g2_i1	890	84	KAG7472514.1	KAG7472514.1 hypothetical protein MATL_G00109650 [Megalops atlanticus]	PTZ00009 superfamily	2.4e-117	Megalops atlanticus	Chordata
TRINITY_DN868_c0_g2_i1	890	84	XP_037881381.1	XP_037881381.1 heat shock 70 kDa protein cognate 4 [Glossina fuscipes]	PTZ00009 superfamily	2.67e-117	Glossina fuscipes	Arthropoda
TRINITY_DN868_c0_g2_i1	890	84	XP_005339035.1	XP_005339035.1 heat shock 70 kDa protein 1-like [Ictidomys tridecemlineatus]	PTZ00009 superfamily	2.82e-117	Ictidomys tridecemlineatus	Chordata
TRINITY_DN868_c0_g2_i1	890	84	XP_031290909.1	XP_031290909.1 heat shock 70 kDa protein 1-like isoform X3 [Camelus dromedarius]	PTZ00009 superfamily	3.12e-117	Camelus dromedarius	Chordata
TRINITY_DN868_c0_g2_i1	890	84	KAG8506043.1	KAG8506043.1 Heat shock 70 kDa protein 1 [Galemys pyrenaicus]	PTZ00009 superfamily	3.22e-117	Galemys pyrenaicus	Chordata
TRINITY_DN868_c0_g2_i1	890	84	XP_040600792.1	XP_040600792.1 LOW QUALITY PROTEIN: heat shock cognate 71 kDa protein-like [Mesocricetus auratus]	PTZ00009 superfamily	3.81e-117	Mesocricetus auratus	Chordata
TRINITY_DN868_c0_g2_i1	890	84	XP_001368926.1	XP_001368926.1 PREDICTED: heat shock 70 kDa protein 1-like [Monodelphis domestica]	PTZ00009 superfamily	4.1e-117	Monodelphis domestica	Chordata
TRINITY_DN868_c0_g2_i1	890	84	XP_014687145.1	XP_014687145.1 PREDICTED: LOW QUALITY PROTEIN: heat shock 70 kDa protein 1-like [Equus asinus]	PTZ00009 superfamily	5.63e-117	Equus asinus	Chordata
TRINITY_DN1332_c0_g1_i1	1165	80	XP_034286799.1	XP_034286799.1 SCAN domain-containing protein 3-like [Pantherophis guttatus]	DUF4371 superfamily	1.83e-121	Pantherophis guttatus	Chordata
TRINITY_DN1332_c0_g1_i1	1165	80	XP_031179958.2	XP_031179958.2 SCAN domain-containing protein 3-like [Sander lucioperca]	DUF4371 superfamily	2.74e-121	Sander lucioperca	Chordata
TRINITY_DN1332_c0_g1_i1	1165	80	XP_034266127.1	XP_034266127.1 SCAN domain-containing protein 3-like [Pantherophis guttatus]	DUF4371 superfamily	8.46e-120	Pantherophis guttatus	Chordata
TRINITY_DN1332_c0_g1_i1	1165	80	XP_032093196.1	XP_032093196.1 SCAN domain-containing protein 3-like [Thamnophis elegans]	DUF4371 superfamily	1.46e-119	Thamnophis elegans	Chordata
TRINITY_DN1332_c0_g1_i1	1165	80	XP_032084417.1	XP_032084417.1 SCAN domain-containing protein 3-like [Thamnophis elegans]	DUF4371 superfamily	2.07e-119	Thamnophis elegans	Chordata
TRINITY_DN1332_c0_g1_i1	1165	80	XP_032080710.1	XP_032080710.1 SCAN domain-containing protein 3-like [Thamnophis elegans]	DUF4371 superfamily	8.16e-119	Thamnophis elegans	Chordata
TRINITY_DN1332_c0_g1_i1	1165	80	XP_041840400.1	XP_041840400.1 SCAN domain-containing protein 3-like [Melanotaenia boesemani]	DUF4371 superfamily	9.78e-119	Melanotaenia boesemani	Chordata
TRINITY_DN1332_c0_g1_i1	1165	80	XP_034263201.1	XP_034263201.1 SCAN domain-containing protein 3-like [Pantherophis guttatus]	DUF4371 superfamily	1.34e-118	Pantherophis guttatus	Chordata
TRINITY_DN1332_c0_g1_i1	1165	80	XP_041834207.1	XP_041834207.1 SCAN domain-containing protein 3-like [Melanotaenia boesemani]	DUF4371 superfamily	1.95e-118	Melanotaenia boesemani	Chordata
TRINITY_DN1332_c0_g1_i1	1165	80	XP_008583495.1	XP_008583495.1 PREDICTED: zinc finger MYM-type protein 6 [Galeopterus variegatus]	DUF4371 superfamily	3.76e-118	Galeopterus variegatus	Chordata
TRINITY_DN1332_c0_g1_i1	1165	80	XP_032064793.1	XP_032064793.1 SCAN domain-containing protein 3-like [Thamnophis elegans]	DUF4371 superfamily	3.69e-117	Thamnophis elegans	Chordata
TRINITY_DN1332_c0_g1_i1	1165	80	XP_025758516.1	XP_025758516.1 SCAN domain-containing protein 3-like [Oreochromis niloticus]	DUF4371 superfamily	1.79e-116	Oreochromis niloticus	Chordata
TRINITY_DN1332_c0_g1_i1	1165	80	XP_034288434.1	XP_034288434.1 LOW QUALITY PROTEIN: SCAN domain-containing protein 3-like, partial [Pantherophis guttatus]	DUF4371 superfamily	1.79e-115	Pantherophis guttatus	Chordata
TRINITY_DN1332_c0_g1_i1	1165	80	ABF22701.1	ABF22701.1 transposase-like protein, partial [Canis lupus familiaris]	DUF4371 superfamily	1.91e-115	Canis lupus familiaris	Chordata
TRINITY_DN1332_c0_g1_i1	1165	80	GCF63366.1	GCF63366.1 hypothetical protein parPi_0029463 [Paroedura picta]	DUF4371 superfamily	2.91e-115	Paroedura picta	Chordata
TRINITY_DN1332_c0_g1_i1	1165	80	XP_022183319.1	XP_022183319.1 zinc finger MYM-type protein 6-like [Myzus persicae]	DUF4371 superfamily	3.68e-115	Myzus persicae	Arthropoda
TRINITY_DN1332_c0_g1_i1	1165	80	ABF22700.1	ABF22700.1 transposase-like protein, partial [Bos taurus]	DUF4371 superfamily	5.58e-115	Bos taurus	Chordata
TRINITY_DN1332_c0_g1_i1	1165	80	KAF6445670.1	KAF6445670.1 hypothetical protein HJG59_019900 [Molossus molossus]	DUF4371 superfamily	7.48e-115	Molossus molossus	Chordata
TRINITY_DN1332_c0_g1_i1	1165	80	XP_026546538.1	XP_026546538.1 SCAN domain-containing protein 3-like isoform X1 [Notechis scutatus]	DUF4371 superfamily	5.44e-114	Notechis scutatus	Chordata
TRINITY_DN1332_c0_g1_i1	1165	80	XP_026579417.1	XP_026579417.1 SCAN domain-containing protein 3-like [Pseudonaja textilis]	DUF4371 superfamily	7.67e-114	Pseudonaja textilis	Chordata
TRINITY_DN3183_c0_g1_i1	994	76	XP_033990575.1	XP_033990575.1 uncharacterized protein LOC117485975 [Trematomus bernacchii]	Dimer_Tnp_hAT superfamily	2.06e-47	Trematomus bernacchii	Chordata
TRINITY_DN3183_c0_g1_i1	994	76	XP_033977708.1	XP_033977708.1 uncharacterized protein LOC117475540 [Trematomus bernacchii]	Dimer_Tnp_hAT superfamily	4.72e-47	Trematomus bernacchii	Chordata
TRINITY_DN3183_c0_g1_i1	994	76	XP_033990409.1	XP_033990409.1 uncharacterized protein LOC117485813 [Trematomus bernacchii]	Dimer_Tnp_hAT superfamily	1.86e-46	Trematomus bernacchii	Chordata
TRINITY_DN3183_c0_g1_i1	994	76	XP_033969494.1	XP_033969494.1 uncharacterized protein LOC117469221 [Trematomus bernacchii]	Dimer_Tnp_hAT superfamily	2.62e-46	Trematomus bernacchii	Chordata
TRINITY_DN3183_c0_g1_i1	994	76	XP_033988816.1	XP_033988816.1 uncharacterized protein LOC117484453 [Trematomus bernacchii]	Dimer_Tnp_hAT superfamily	4.01e-46	Trematomus bernacchii	Chordata
TRINITY_DN3183_c0_g1_i1	994	76	XP_033977730.1	XP_033977730.1 zinc finger MYM-type protein 1-like [Trematomus bernacchii]	Dimer_Tnp_hAT superfamily	7.74e-46	Trematomus bernacchii	Chordata
TRINITY_DN3183_c0_g1_i1	994	76	XP_033988054.1	XP_033988054.1 zinc finger MYM-type protein 1-like [Trematomus bernacchii]	Dimer_Tnp_hAT superfamily	1.52e-45	Trematomus bernacchii	Chordata
TRINITY_DN3183_c0_g1_i1	994	76	XP_033977395.1	XP_033977395.1 uncharacterized protein LOC117475359 [Trematomus bernacchii]	Dimer_Tnp_hAT superfamily	2.21e-45	Trematomus bernacchii	Chordata
TRINITY_DN3183_c0_g1_i1	994	76	XP_026015294.1	XP_026015294.1 uncharacterized protein LOC113016590 [Astatotilapia calliptera]	Dimer_Tnp_hAT superfamily	5.07e-45	Astatotilapia calliptera	Chordata
TRINITY_DN3183_c0_g1_i1	994	76	XP_039454057.1	XP_039454057.1 uncharacterized protein LOC116332126 [Oreochromis aureus]	Dimer_Tnp_hAT superfamily	1.14e-44	Oreochromis aureus	Chordata
TRINITY_DN3183_c0_g1_i1	994	76	XP_034082528.1	XP_034082528.1 uncharacterized protein LOC117552929 [Gymnodraco acuticeps]	Dimer_Tnp_hAT superfamily	1.28e-44	Gymnodraco acuticeps	Chordata
TRINITY_DN3183_c0_g1_i1	994	76	XP_033977734.1	XP_033977734.1 zinc finger MYM-type protein 1-like [Trematomus bernacchii]	Dimer_Tnp_hAT superfamily	1.32e-44	Trematomus bernacchii	Chordata
TRINITY_DN3183_c0_g1_i1	994	76	XP_019210937.1	XP_019210937.1 uncharacterized protein LOC109200018 [Oreochromis niloticus]	Dimer_Tnp_hAT superfamily	1.83e-44	Oreochromis niloticus;Astatotilapia calliptera;Maylandia zebra	Chordata
TRINITY_DN3183_c0_g1_i1	994	76	XP_041842531.1	XP_041842531.1 uncharacterized protein LOC121640745 [Melanotaenia boesemani]	Dimer_Tnp_hAT superfamily	2.13e-44	Melanotaenia boesemani	Chordata
TRINITY_DN3183_c0_g1_i1	994	76	XP_033987864.1	XP_033987864.1 zinc finger MYM-type protein 1-like [Trematomus bernacchii]	Dimer_Tnp_hAT superfamily	2.56e-44	Trematomus bernacchii	Chordata
TRINITY_DN3183_c0_g1_i1	994	76	XP_033976228.1	XP_033976228.1 zinc finger MYM-type protein 1-like [Trematomus bernacchii]	Dimer_Tnp_hAT superfamily	3.66e-44	Trematomus bernacchii	Chordata
TRINITY_DN3183_c0_g1_i1	994	76	XP_033998311.1	XP_033998311.1 zinc finger MYM-type protein 1-like [Trematomus bernacchii]	Dimer_Tnp_hAT superfamily	5.06e-44	Trematomus bernacchii	Chordata
TRINITY_DN3183_c0_g1_i1	994	76	XP_033998058.1	XP_033998058.1 zinc finger MYM-type protein 1-like [Trematomus bernacchii]	Dimer_Tnp_hAT superfamily	6.15e-44	Trematomus bernacchii	Chordata
TRINITY_DN3183_c0_g1_i1	994	76	XP_041845986.1	XP_041845986.1 uncharacterized protein LOC121642957 isoform X2 [Melanotaenia boesemani]	Dimer_Tnp_hAT superfamily	8.32e-44	Melanotaenia boesemani	Chordata
TRINITY_DN3183_c0_g1_i1	994	76	XP_030268777.1	XP_030268777.1 uncharacterized protein LOC115579399 [Sparus aurata]	Dimer_Tnp_hAT superfamily	9.84e-44	Sparus aurata	Chordata
TRINITY_DN3199_c0_g2_i1	919	76	XP_014190650.2	XP_014190650.2 uncharacterized protein K02A2.6 [Haplochromis burtoni]	RNase_HI_RT_Ty3	1.82e-109	Haplochromis burtoni	Chordata
TRINITY_DN3199_c0_g2_i1	919	76	XP_026046823.1	XP_026046823.1 uncharacterized protein K02A2.6-like [Astatotilapia calliptera]	RNase_HI_RT_Ty3	9.54e-108	Astatotilapia calliptera	Chordata
TRINITY_DN3199_c0_g2_i1	919	76	XP_039893254.1	XP_039893254.1 uncharacterized protein K02A2.6-like [Simochromis diagramma]	RNase_HI_RT_Ty3	3.91e-106	Simochromis diagramma	Chordata
TRINITY_DN3199_c0_g2_i1	919	76	XP_015810099.1	XP_015810099.1 PREDICTED: uncharacterized protein K02A2.6-like, partial [Nothobranchius furzeri]	RNase_HI_RT_Ty3	4.67e-105	Nothobranchius furzeri	Chordata
TRINITY_DN3199_c0_g2_i1	919	76	XP_029213902.1	XP_029213902.1 uncharacterized protein K02A2.6-like [Acropora millepora]	RNase_HI_RT_Ty3	2.66e-104	Acropora millepora	Cnidaria
TRINITY_DN3199_c0_g2_i1	919	76	XP_026042813.1	XP_026042813.1 uncharacterized protein K02A2.6-like [Astatotilapia calliptera]	RNase_HI_RT_Ty3	1.2e-103	Astatotilapia calliptera	Chordata
TRINITY_DN3199_c0_g2_i1	919	76	XP_039525150.1	XP_039525150.1 uncharacterized protein K02A2.6-like [Pimephales promelas]	RNase_HI_RT_Ty3	2.53e-103	Pimephales promelas	Chordata
TRINITY_DN3199_c0_g2_i1	919	76	RUM45435.1	RUM45435.1 hypothetical protein DSY80_03320, partial [Desulfocapsa sp.]	RNase_HI_RT_Ty3	2.89e-103	Desulfocapsa sp.	Proteobacteria
TRINITY_DN3199_c0_g2_i1	919	76	XP_036837649.1	XP_036837649.1 uncharacterized protein K02A2.6-like [Oncorhynchus mykiss]	RNase_HI_RT_Ty3	3.53e-102	Oncorhynchus mykiss	Chordata
TRINITY_DN3199_c0_g2_i1	919	76	XP_026065322.1	XP_026065322.1 uncharacterized protein K02A2.6-like [Carassius auratus]	RNase_HI_RT_Ty3	5.16e-102	Carassius auratus	Chordata
TRINITY_DN3199_c0_g2_i1	919	76	XP_039505380.1	XP_039505380.1 uncharacterized protein K02A2.6-like [Pimephales promelas]	RNase_HI_RT_Ty3	6.01e-102	Pimephales promelas	Chordata
TRINITY_DN3199_c0_g2_i1	919	76	KAG1937898.1	KAG1937898.1 retrotransposable element [Pimephales promelas]	RNase_HI_RT_Ty3	7.64e-102	Pimephales promelas	Chordata
TRINITY_DN3199_c0_g2_i1	919	76	XP_031760407.1	XP_031760407.1 uncharacterized protein K02A2.6-like, partial [Xenopus tropicalis]	RNase_HI_RT_Ty3	9.32e-102	Xenopus tropicalis	Chordata
TRINITY_DN3199_c0_g2_i1	919	76	XP_021340098.1	XP_021340098.1 uncharacterized protein K02A2.6-like [Mizuhopecten yessoensis]	RNase_HI_RT_Ty3	1.1e-101	Mizuhopecten yessoensis	Mollusca
TRINITY_DN3199_c0_g2_i1	919	76	XP_036845205.1	XP_036845205.1 uncharacterized protein K02A2.6-like [Oncorhynchus mykiss]	RNase_HI_RT_Ty3	1.21e-101	Oncorhynchus mykiss	Chordata
TRINITY_DN3199_c0_g2_i1	919	76	XP_041435047.1	XP_041435047.1 uncharacterized protein K02A2.6-like [Xenopus laevis]	RNase_HI_RT_Ty3	4.04e-101	Xenopus laevis	Chordata
TRINITY_DN3199_c0_g2_i1	919	76	XP_041958582.1	XP_041958582.1 uncharacterized protein K02A2.6-like [Alosa sapidissima]	RNase_HI_RT_Ty3	5.89e-101	Alosa sapidissima	Chordata
TRINITY_DN3199_c0_g2_i1	919	76	XP_041371536.1	XP_041371536.1 uncharacterized protein K02A2.6-like [Gigantopelta aegis]	RNase_HI_RT_Ty3	1.01e-100	Gigantopelta aegis	Mollusca
TRINITY_DN3199_c0_g2_i1	919	76	XP_040071486.3	XP_040071486.3 uncharacterized protein K02A2.6-like [Ixodes scapularis]	RNase_HI_RT_Ty3	1.11e-100	Ixodes scapularis	Arthropoda
TRINITY_DN3199_c0_g2_i1	919	76	XP_029841534.3	XP_029841534.3 uncharacterized protein K02A2.6-like [Ixodes scapularis]	RNase_HI_RT_Ty3	3.12e-100	Ixodes scapularis	Arthropoda
TRINITY_DN9621_c0_g2_i3	399	72	KAG8313634.1	KAG8313634.1 Magnesium-dependent phosphatase 1 [Homalodisca vitripennis]	HAD_like superfamily	9.8e-51	Homalodisca vitripennis	Arthropoda
TRINITY_DN9621_c0_g2_i3	399	72	XP_026851630.2	XP_026851630.2 magnesium-dependent phosphatase 1 [Electrophorus electricus]	HAD_like superfamily	1.11e-09	Electrophorus electricus	Chordata
TRINITY_DN9621_c0_g2_i3	399	72	XP_017341794.1	XP_017341794.1 PREDICTED: magnesium-dependent phosphatase 1 [Ictalurus punctatus]	HAD_like superfamily	1.11e-09	Ictalurus punctatus	Chordata
TRINITY_DN9621_c0_g2_i3	399	72	XP_028817112.1	XP_028817112.1 magnesium-dependent phosphatase 1 [Denticeps clupeoides]	HAD_like superfamily	1.24e-09	Denticeps clupeoides	Chordata
TRINITY_DN9621_c0_g2_i3	399	72	XP_010870420.2	XP_010870420.2 magnesium-dependent phosphatase 1 [Esox lucius]	HAD_like superfamily	2.23e-09	Esox lucius	Chordata
TRINITY_DN9621_c0_g2_i3	399	72	XP_030643067.1	XP_030643067.1 magnesium-dependent phosphatase 1 [Chanos chanos]	HAD_like superfamily	3.18e-09	Chanos chanos	Chordata
TRINITY_DN9621_c0_g2_i3	399	72	XP_041913156.1	XP_041913156.1 magnesium-dependent phosphatase 1-like [Alosa sapidissima]	HAD_like superfamily	4.38e-09	Alosa sapidissima;Alosa alosa	Chordata
TRINITY_DN9621_c0_g2_i3	399	72	XP_035271176.1	XP_035271176.1 magnesium-dependent phosphatase 1 isoform X2 [Anguilla anguilla]	HAD_like superfamily	5.59e-09	Anguilla anguilla	Chordata
TRINITY_DN9621_c0_g2_i3	399	72	KAG5849736.1	KAG5849736.1 hypothetical protein ANANG_G00074880 [Anguilla anguilla]	HAD_like superfamily	5.92e-09	Anguilla anguilla	Chordata
TRINITY_DN9621_c0_g2_i3	399	72	XP_035271174.1	XP_035271174.1 magnesium-dependent phosphatase 1 isoform X1 [Anguilla anguilla]	HAD_like superfamily	5.92e-09	Anguilla anguilla	Chordata
TRINITY_DN9621_c0_g2_i3	399	72	XP_030642881.1	XP_030642881.1 magnesium-dependent phosphatase 1-like [Chanos chanos]	HAD_like superfamily	8.77e-09	Chanos chanos	Chordata
TRINITY_DN9621_c0_g2_i3	399	72	PSN38966.1	PSN38966.1 Magnesium-dependent phosphatase 1 [Blattella germanica]	HAD_like superfamily	1.07e-08	Blattella germanica	Arthropoda
TRINITY_DN9621_c0_g2_i3	399	72	KAF7696349.1	KAF7696349.1 hypothetical protein HF521_006443 [Silurus meridionalis]	HAD_like superfamily	1.19e-08	Silurus meridionalis	Chordata
TRINITY_DN9621_c0_g2_i3	399	72	XP_042857805.1	XP_042857805.1 magnesium-dependent phosphatase 1-like [Penaeus japonicus]	HAD_like superfamily	1.32e-08	Penaeus japonicus	Arthropoda
TRINITY_DN9621_c0_g2_i3	399	72	XP_022188666.1	XP_022188666.1 magnesium-dependent phosphatase 1 isoform X2 [Nilaparvata lugens]	HAD_like superfamily	1.75e-08	Nilaparvata lugens	Arthropoda
TRINITY_DN9621_c0_g2_i3	399	72	ROT72929.1	ROT72929.1 putative magnesium-dependent phosphatase 1-like [Penaeus vannamei]	HAD_like superfamily	1.85e-08	Penaeus vannamei	Arthropoda
TRINITY_DN9621_c0_g2_i3	399	72	XP_027217647.1	XP_027217647.1 magnesium-dependent phosphatase 1-like [Penaeus vannamei]	HAD_like superfamily	2.68e-08	Penaeus vannamei	Arthropoda
TRINITY_DN9621_c0_g2_i3	399	72	XP_037556603.1	XP_037556603.1 magnesium-dependent phosphatase 1-like [Dermacentor silvarum]	HAD_like superfamily	2.82e-08	Dermacentor silvarum	Arthropoda
TRINITY_DN9621_c0_g2_i3	399	72	XP_031431038.1	XP_031431038.1 magnesium-dependent phosphatase 1 [Clupea harengus]	HAD_like superfamily	3.32e-08	Clupea harengus	Chordata
TRINITY_DN9621_c0_g2_i3	399	72	KAF5893508.1	KAF5893508.1 magnesium-dependent phosphatase 1, partial [Clarias magur]	HAD_like superfamily	4.16e-08	Clarias magur	Chordata
TRINITY_DN44140_c0_g1_i1	567	64	KAG8241054.1	KAG8241054.1 Outer dense fiber protein 3-like protein 2 [Homalodisca vitripennis]	#N/A	1e-36	Homalodisca vitripennis	Arthropoda
TRINITY_DN44140_c0_g1_i1	567	64	XP_040917444.1	XP_040917444.1 outer dense fiber protein 3-like protein 2a [Toxotes jaculatrix]	#N/A	2.89e-11	Toxotes jaculatrix	Chordata
TRINITY_DN44140_c0_g1_i1	567	64	XP_026792902.1	XP_026792902.1 outer dense fiber protein 3-like protein 2a [Pangasianodon hypophthalmus]	#N/A	2.89e-11	Pangasianodon hypophthalmus	Chordata
TRINITY_DN44140_c0_g1_i1	567	64	KAF7705871.1	KAF7705871.1 hypothetical protein HF521_019125 [Silurus meridionalis]	#N/A	2.8e-10	Silurus meridionalis	Chordata
TRINITY_DN44140_c0_g1_i1	567	64	XP_035465520.1	XP_035465520.1 outer dense fiber protein 3-like protein 2a [Scophthalmus maximus]	#N/A	3.16e-10	Scophthalmus maximus	Chordata
TRINITY_DN44140_c0_g1_i1	567	64	XP_041729135.1	XP_041729135.1 outer dense fiber protein 3-like protein 2a [Coregonus clupeaformis]	#N/A	3.78e-10	Coregonus clupeaformis	Chordata
TRINITY_DN44140_c0_g1_i1	567	64	CAB1327855.1	CAB1327855.1 unnamed protein product [Coregonus sp. 'balchen']	#N/A	3.78e-10	Coregonus sp. 'balchen'	Chordata
TRINITY_DN44140_c0_g1_i1	567	64	XP_018586982.1	XP_018586982.1 outer dense fiber protein 3-like protein 2 isoform X2 [Scleropages formosus]	#N/A	4.65e-10	Scleropages formosus	Chordata
TRINITY_DN44140_c0_g1_i1	567	64	XP_014025198.1	XP_014025198.1 PREDICTED: outer dense fiber protein 3-like protein 2 isoform X2 [Salmo salar]	#N/A	7.8e-10	Salmo salar	Chordata
TRINITY_DN44140_c0_g1_i1	567	64	AWP16286.1	AWP16286.1 Class I helical cytokine receptor number 1 [Scophthalmus maximus]	#N/A	8.33e-10	Scophthalmus maximus	Chordata
TRINITY_DN44140_c0_g1_i1	567	64	XP_017326586.1	XP_017326586.1 PREDICTED: outer dense fiber protein 3-like protein 2 [Ictalurus punctatus]	#N/A	1.02e-09	Ictalurus punctatus	Chordata
TRINITY_DN44140_c0_g1_i1	567	64	KAF3845051.1	KAF3845051.1 hypothetical protein F7725_008214 [Dissostichus mawsoni]	#N/A	1.14e-09	Dissostichus mawsoni	Chordata
TRINITY_DN44140_c0_g1_i1	567	64	XP_018416068.1	XP_018416068.1 PREDICTED: outer dense fiber protein 3-like protein 2 [Nanorana parkeri]	#N/A	1.36e-09	Nanorana parkeri	Chordata
TRINITY_DN44140_c0_g1_i1	567	64	XP_028831113.1	XP_028831113.1 outer dense fiber protein 3-like protein 2 [Denticeps clupeoides]	#N/A	1.42e-09	Denticeps clupeoides	Chordata
TRINITY_DN44140_c0_g1_i1	567	64	XP_026105119.1	XP_026105119.1 outer dense fiber protein 3-like protein 2 [Carassius auratus]	#N/A	2.63e-09	Carassius auratus	Chordata
TRINITY_DN44140_c0_g1_i1	567	64	XP_024292266.1	XP_024292266.1 outer dense fiber protein 3-like protein 2b [Oncorhynchus tshawytscha]	#N/A	2.65e-09	Oncorhynchus tshawytscha	Chordata
TRINITY_DN44140_c0_g1_i1	567	64	XP_019953558.1	XP_019953558.1 PREDICTED: outer dense fiber protein 3-like protein 2 [Paralichthys olivaceus]	#N/A	2.68e-09	Paralichthys olivaceus	Chordata
TRINITY_DN44140_c0_g1_i1	567	64	XP_041828554.1	XP_041828554.1 outer dense fiber protein 3-like protein 2a [Melanotaenia boesemani]	#N/A	2.74e-09	Melanotaenia boesemani	Chordata
TRINITY_DN44140_c0_g1_i1	567	64	XP_014025200.1	XP_014025200.1 PREDICTED: outer dense fiber protein 3-like protein 2 isoform X4 [Salmo salar]	#N/A	3.66e-09	Salmo salar	Chordata
TRINITY_DN44140_c0_g1_i1	567	64	XP_031719737.1	XP_031719737.1 outer dense fiber protein 3-like protein 2 [Anarrhichthys ocellatus]	#N/A	4.9e-09	Anarrhichthys ocellatus	Chordata
TRINITY_DN75205_c0_g1_i1	910	62	KAG8250081.1	KAG8250081.1 TRP-like ion channel Pkd2 [Homalodisca vitripennis]	PKD_channel superfamily	1.59e-88	Homalodisca vitripennis	Arthropoda
TRINITY_DN75205_c0_g1_i1	910	62	XP_016395310.1	XP_016395310.1 PREDICTED: polycystin-2-like isoform X5 [Sinocyclocheilus rhinocerous]	PKD_channel superfamily	5.03e-42	Sinocyclocheilus rhinocerous	Chordata
TRINITY_DN75205_c0_g1_i1	910	62	XP_016395309.1	XP_016395309.1 PREDICTED: polycystin-2-like isoform X4 [Sinocyclocheilus rhinocerous]	PKD_channel superfamily	7.32e-42	Sinocyclocheilus rhinocerous	Chordata
TRINITY_DN75205_c0_g1_i1	910	62	XP_016395308.1	XP_016395308.1 PREDICTED: polycystin-2-like isoform X3 [Sinocyclocheilus rhinocerous]	PKD_channel superfamily	7.85e-42	Sinocyclocheilus rhinocerous	Chordata
TRINITY_DN75205_c0_g1_i1	910	62	XP_016395307.1	XP_016395307.1 PREDICTED: polycystin-2-like isoform X2 [Sinocyclocheilus rhinocerous]	PKD_channel superfamily	7.96e-42	Sinocyclocheilus rhinocerous	Chordata
TRINITY_DN75205_c0_g1_i1	910	62	XP_016395306.1	XP_016395306.1 PREDICTED: polycystin-2-like isoform X1 [Sinocyclocheilus rhinocerous]	PKD_channel superfamily	7.98e-42	Sinocyclocheilus rhinocerous	Chordata
TRINITY_DN75205_c0_g1_i1	910	62	XP_016325785.1	XP_016325785.1 PREDICTED: polycystin-2-like isoform X4 [Sinocyclocheilus anshuiensis]	PKD_channel superfamily	3.49e-41	Sinocyclocheilus anshuiensis	Chordata
TRINITY_DN75205_c0_g1_i1	910	62	XP_016325779.1	XP_016325779.1 PREDICTED: polycystin-2-like isoform X3 [Sinocyclocheilus anshuiensis]	PKD_channel superfamily	3.72e-41	Sinocyclocheilus anshuiensis	Chordata
TRINITY_DN75205_c0_g1_i1	910	62	XP_016325774.1	XP_016325774.1 PREDICTED: polycystin-2-like isoform X2 [Sinocyclocheilus anshuiensis]	PKD_channel superfamily	3.77e-41	Sinocyclocheilus anshuiensis	Chordata
TRINITY_DN75205_c0_g1_i1	910	62	XP_016325767.1	XP_016325767.1 PREDICTED: polycystin-2-like isoform X1 [Sinocyclocheilus anshuiensis]	PKD_channel superfamily	3.77e-41	Sinocyclocheilus anshuiensis	Chordata
TRINITY_DN75205_c0_g1_i1	910	62	KAF4118406.1	KAF4118406.1 hypothetical protein G5714_000457 [Onychostoma macrolepis]	PKD_channel superfamily	3.77e-41	Onychostoma macrolepis	Chordata
TRINITY_DN75205_c0_g1_i1	910	62	KTF87216.1	KTF87216.1 hypothetical protein cypCar_00017182 [Cyprinus carpio]	PKD_channel superfamily	4.88e-41	Cyprinus carpio	Chordata
TRINITY_DN75205_c0_g1_i1	910	62	XP_017209279.1	XP_017209279.1 polycystin-2 isoform X2 [Danio rerio]	PKD_channel superfamily	5.2e-41	Danio rerio	Chordata
TRINITY_DN75205_c0_g1_i1	910	62	NP_001002310.1	NP_001002310.1 polycystin-2 [Danio rerio]	PKD_channel superfamily	5.2e-41	Danio rerio	Chordata
TRINITY_DN75205_c0_g1_i1	910	62	XP_016139974.1	XP_016139974.1 PREDICTED: polycystin-2-like isoform X4 [Sinocyclocheilus grahami]	PKD_channel superfamily	6.53e-41	Sinocyclocheilus grahami	Chordata
TRINITY_DN75205_c0_g1_i1	910	62	XP_026059409.1	XP_026059409.1 polycystin-2 isoform X3 [Carassius auratus]	PKD_channel superfamily	6.82e-41	Carassius auratus	Chordata
TRINITY_DN75205_c0_g1_i1	910	62	XP_026059408.1	XP_026059408.1 polycystin-2 isoform X2 [Carassius auratus]	PKD_channel superfamily	6.92e-41	Carassius auratus	Chordata
TRINITY_DN75205_c0_g1_i1	910	62	XP_026059407.1	XP_026059407.1 polycystin-2 isoform X1 [Carassius auratus]	PKD_channel superfamily	6.93e-41	Carassius auratus	Chordata
TRINITY_DN75205_c0_g1_i1	910	62	XP_016139973.1	XP_016139973.1 PREDICTED: polycystin-2-like isoform X3 [Sinocyclocheilus grahami]	PKD_channel superfamily	6.93e-41	Sinocyclocheilus grahami	Chordata
TRINITY_DN75205_c0_g1_i1	910	62	XP_016139972.1	XP_016139972.1 PREDICTED: polycystin-2-like isoform X2 [Sinocyclocheilus grahami]	PKD_channel superfamily	7.02e-41	Sinocyclocheilus grahami	Chordata
TRINITY_DN40015_c0_g2_i1	721	62	XP_016388312.1	XP_016388312.1 PREDICTED: zinc finger BED domain-containing protein 4-like [Sinocyclocheilus rhinocerous]	Dimer_Tnp_hAT superfamily	8.08e-09	Sinocyclocheilus rhinocerous	Chordata
TRINITY_DN40015_c0_g2_i1	721	62	XP_018948687.1	XP_018948687.1 E3 SUMO-protein ligase ZBED1-like isoform X4 [Cyprinus carpio]	Dimer_Tnp_hAT superfamily	1.01e-08	Cyprinus carpio	Chordata
TRINITY_DN40015_c0_g2_i1	721	62	XP_016320210.1	XP_016320210.1 PREDICTED: zinc finger BED domain-containing protein 4-like isoform X4 [Sinocyclocheilus anshuiensis]	Dimer_Tnp_hAT superfamily	1.01e-08	Sinocyclocheilus anshuiensis	Chordata
TRINITY_DN40015_c0_g2_i1	721	62	XP_042624992.1	XP_042624992.1 E3 SUMO-protein ligase ZBED1-like isoform X3 [Cyprinus carpio]	Dimer_Tnp_hAT superfamily	1.04e-08	Cyprinus carpio	Chordata
[truncated: 1,921 more rows]

## Sheet: StIT2_chordata
transcript_ID	transcript_length	mapped_reads	best_hit_accession_number	best_hit_description	Conserved_domains	E_value	species	phylum
TRINITY_DN14102_c0_g1_i1	619	29170	XP_035695241.1	XP_035695241.1 histone H4-like [Branchiostoma floridae]	PLN00035	1.39e-66	Branchiostoma floridae	Chordata
TRINITY_DN14102_c0_g1_i1	619	29170	XP_018841715.1	XP_018841715.1 histone H4-like [Juglans regia]	PLN00035	1.37e-65	Juglans regia	Streptophyta
TRINITY_DN14102_c0_g1_i1	619	29170	KFO33707.1	KFO33707.1 Histone H4 [Fukomys damarensis]	PLN00035	1.97e-65	Fukomys damarensis	Chordata
TRINITY_DN14102_c0_g1_i1	619	29170	XP_033617846.1	XP_033617846.1 histone H4-like [Fukomys damarensis]	PLN00035	3.33e-65	Fukomys damarensis	Chordata
TRINITY_DN14102_c0_g1_i1	619	29170	XP_040317033.1	XP_040317033.1 histone H4-like [Puma yagouaroundi]	PLN00035	4.42e-65	Puma yagouaroundi	Chordata
TRINITY_DN14102_c0_g1_i1	619	29170	KZS11139.1	KZS11139.1 Histone H4 type G-like protein [Daphnia magna]	PLN00035	5.15e-65	Daphnia magna	Arthropoda
TRINITY_DN14102_c0_g1_i1	619	29170	XP_029098646.1	XP_029098646.1 histone H4 isoform X1 [Monodon monoceros]	PLN00035	5.93e-65	Monodon monoceros	Chordata
TRINITY_DN14102_c0_g1_i1	619	29170	OBS57542.1	OBS57542.1 hypothetical protein A6R68_11326 [Neotoma lepida]	PLN00035	7e-65	Neotoma lepida	Chordata
TRINITY_DN14102_c0_g1_i1	619	29170	XP_031748978.1	XP_031748978.1 histone H4-like [Xenopus tropicalis]	PLN00035	1.23e-64	Xenopus tropicalis	Chordata
TRINITY_DN14102_c0_g1_i1	619	29170	XP_041432569.1	XP_041432569.1 histone H4-like [Xenopus laevis]	PLN00035	1.58e-64	Xenopus laevis	Chordata
TRINITY_DN14102_c0_g1_i1	619	29170	CAB3402301.1	CAB3402301.1 unnamed protein product [Caenorhabditis bovis]	PLN00035	1.74e-64	Caenorhabditis bovis	Nematoda
TRINITY_DN14102_c0_g1_i1	619	29170	XP_021706523.1	XP_021706523.1 histone H4-like [Aedes aegypti]	PLN00035	2.41e-64	Aedes aegypti	Arthropoda
TRINITY_DN14102_c0_g1_i1	619	29170	WP_150080620.1	WP_150080620.1 hypothetical protein, partial [Pseudomonas aeruginosa]	PLN00035	2.46e-64	Pseudomonas aeruginosa	Proteobacteria
TRINITY_DN14102_c0_g1_i1	619	29170	MAO08131.1	MAO08131.1 hypothetical protein [Alteromonas sp.]	PLN00035	2.99e-64	Alteromonas sp.	Proteobacteria
TRINITY_DN14102_c0_g1_i1	619	29170	XP_040516427.1	XP_040516427.1 histone H4 type VIII isoform X2 [Gallus gallus]	PLN00035	3.15e-64	Gallus gallus	Chordata
TRINITY_DN14102_c0_g1_i1	619	29170	VDM50372.1	VDM50372.1 unnamed protein product [Toxocara canis]	PLN00035	3.51e-64	Toxocara canis	Nematoda
TRINITY_DN14102_c0_g1_i1	619	29170	XP_006872834.1	XP_006872834.1 PREDICTED: histone H4-like [Chrysochloris asiatica]	PLN00035	3.63e-64	Chrysochloris asiatica	Chordata
TRINITY_DN14102_c0_g1_i1	619	29170	XP_035977467.1	XP_035977467.1 histone H4-like [Halichoerus grypus]	PLN00035	4.13e-64	Halichoerus grypus	Chordata
TRINITY_DN14102_c0_g1_i1	619	29170	XP_037576284.1	XP_037576284.1 histone H4-like [Dermacentor silvarum]	PLN00035	4.34e-64	Dermacentor silvarum	Arthropoda
TRINITY_DN14102_c0_g1_i1	619	29170	KXJ20872.1	KXJ20872.1 Histone H4 [Exaiptasia diaphana]	PLN00035	5.46e-64	Exaiptasia diaphana	Cnidaria
TRINITY_DN99100_c2_g1_i1	385	4140	XP_036224422.1	XP_036224422.1 polyubiquitin-B, partial [Bactrocera oleae]	Ubl_ubiquitin	1.07e-83	Bactrocera oleae	Arthropoda
TRINITY_DN99100_c2_g1_i1	385	4140	XP_042337780.1	XP_042337780.1 polyubiquitin-B-like, partial [Plectropomus leopardus]	Ubl_ubiquitin	1.11e-83	Plectropomus leopardus	Chordata
TRINITY_DN99100_c2_g1_i1	385	4140	KAA8586383.1	KAA8586383.1 hypothetical protein FQN60_000219, partial [Etheostoma spectabile]	Ubl_ubiquitin	2.03e-83	Etheostoma spectabile	Chordata
TRINITY_DN99100_c2_g1_i1	385	4140	NXV06335.1	NXV06335.1 UBB protein [Cettia cetti]	Ubl_ubiquitin	2.4e-83	Cettia cetti	Chordata
TRINITY_DN99100_c2_g1_i1	385	4140	NXN81308.1	NXN81308.1 UBB protein [Bombycilla garrulus]	Ubl_ubiquitin	2.49e-83	Bombycilla garrulus	Chordata
TRINITY_DN99100_c2_g1_i1	385	4140	CAF3686065.1	CAF3686065.1 unnamed protein product [Rotaria sp. Silwood1]	Ubl_ubiquitin	2.49e-83	Rotaria sp. Silwood1	Rotifera
TRINITY_DN99100_c2_g1_i1	385	4140	KFP50091.1	KFP50091.1 Polyubiquitin-B, partial [Cathartes aura]	Ubl_ubiquitin	2.49e-83	Cathartes aura	Chordata
TRINITY_DN99100_c2_g1_i1	385	4140	XP_033119085.1	XP_033119085.1 polyubiquitin-B, partial [Anneissia japonica]	Ubl_ubiquitin	2.57e-83	Anneissia japonica	Echinodermata
TRINITY_DN99100_c2_g1_i1	385	4140	NWZ17666.1	NWZ17666.1 UBB protein [Agelaius phoeniceus]	Ubl_ubiquitin	2.66e-83	Agelaius phoeniceus;Riptortus pedestris	Chordata
TRINITY_DN99100_c2_g1_i1	385	4140	QIB02614.1	QIB02614.1 ubiquitin, partial [Eucryptorrhynchus scrobiculatus]	Ubl_ubiquitin	2.75e-83	Eucryptorrhynchus scrobiculatus	Arthropoda
TRINITY_DN99100_c2_g1_i1	385	4140	KFP74355.1	KFP74355.1 Polyubiquitin, partial [Apaloderma vittatum]	Ubl_ubiquitin	2.84e-83	Apaloderma vittatum	Chordata
TRINITY_DN99100_c2_g1_i1	385	4140	XP_034505939.1	XP_034505939.1 polyubiquitin-B-like, partial [Ailuropoda melanoleuca]	Ubl_ubiquitin	3.04e-83	Ailuropoda melanoleuca	Chordata
TRINITY_DN99100_c2_g1_i1	385	4140	ACH45557.1	ACH45557.1 putative ubiquitin C variant 4 [Taeniopygia guttata]	Ubl_ubiquitin	3.15e-83	Taeniopygia guttata	Chordata
TRINITY_DN99100_c2_g1_i1	385	4140	NXQ29558.1	NXQ29558.1 UBB protein [Alaudala cheleensis]	Ubl_ubiquitin	3.25e-83	Alaudala cheleensis	Chordata
TRINITY_DN99100_c2_g1_i1	385	4140	XP_042338950.1	XP_042338950.1 polyubiquitin-B, partial [Plectropomus leopardus]	Ubl_ubiquitin	3.25e-83	Plectropomus leopardus	Chordata
TRINITY_DN99100_c2_g1_i1	385	4140	AAV84266.1	AAV84266.1 ubiquitin, partial [Culicoides sonorensis]	Ubl_ubiquitin	3.25e-83	Culicoides sonorensis	Arthropoda
TRINITY_DN99100_c2_g1_i1	385	4140	ABC94632.1	ABC94632.1 ubiquitin C, partial [Ictalurus punctatus]	Ubl_ubiquitin	3.36e-83	Ictalurus punctatus	Chordata
TRINITY_DN99100_c2_g1_i1	385	4140	TNN13378.1	TNN13378.1 Polyubiquitin-B isoform 1 [Schistosoma japonicum]	Ubl_ubiquitin	3.6e-83	Schistosoma japonicum	Platyhelminthes
TRINITY_DN99100_c2_g1_i1	385	4140	CAX71218.1	CAX71218.1 polyubiquitin [Schistosoma japonicum]	Ubl_ubiquitin	3.6e-83	Schistosoma japonicum	Platyhelminthes
TRINITY_DN99100_c2_g1_i1	385	4140	DAA34466.1	DAA34466.1 TPA_exp: ubiquitin, partial [Amblyomma variegatum]	Ubl_ubiquitin	3.6e-83	Amblyomma variegatum	Arthropoda
TRINITY_DN100196_c2_g1_i2	6927	2778	XP_033978450.1	XP_033978450.1 uncharacterized protein LOC117476190 [Trematomus bernacchii]	DUF4371 superfamily	7.82e-244	Trematomus bernacchii	Chordata
TRINITY_DN100196_c2_g1_i2	6927	2778	XP_042073318.1	XP_042073318.1 uncharacterized protein LOC121813551 [Haplochromis burtoni]	DUF4371 superfamily	8.93e-230	Haplochromis burtoni	Chordata
TRINITY_DN100196_c2_g1_i2	6927	2778	XP_019206715.2	XP_019206715.2 uncharacterized protein LOC109196779 [Oreochromis niloticus]	DUF4371 superfamily	1.52e-229	Oreochromis niloticus	Chordata
TRINITY_DN100196_c2_g1_i2	6927	2778	XP_039462400.1	XP_039462400.1 uncharacterized protein LOC120436086 [Oreochromis aureus]	DUF4371 superfamily	1.52e-229	Oreochromis aureus	Chordata
TRINITY_DN100196_c2_g1_i2	6927	2778	XP_034060925.1	XP_034060925.1 uncharacterized protein LOC117539032 [Gymnodraco acuticeps]	DUF4371 superfamily	8.58e-229	Gymnodraco acuticeps	Chordata
TRINITY_DN100196_c2_g1_i2	6927	2778	XP_030264273.1	XP_030264273.1 zinc finger MYM-type protein 1-like [Sparus aurata]	DUF4371 superfamily	6.65e-227	Sparus aurata	Chordata
TRINITY_DN100196_c2_g1_i2	6927	2778	XP_026133409.1	XP_026133409.1 zinc finger MYM-type protein 1-like [Carassius auratus]	DUF4371 superfamily	8.19e-225	Carassius auratus	Chordata
TRINITY_DN100196_c2_g1_i2	6927	2778	XP_034073708.1	XP_034073708.1 uncharacterized protein LOC117547230 [Gymnodraco acuticeps]	DUF4371 superfamily	9.81e-225	Gymnodraco acuticeps	Chordata
TRINITY_DN100196_c2_g1_i2	6927	2778	XP_026108666.1	XP_026108666.1 zinc finger MYM-type protein 1-like [Carassius auratus]	DUF4371 superfamily	1.37e-224	Carassius auratus	Chordata
TRINITY_DN100196_c2_g1_i2	6927	2778	XP_034091820.1	XP_034091820.1 uncharacterized protein LOC117559253 [Gymnodraco acuticeps]	DUF4371 superfamily	2.7e-223	Gymnodraco acuticeps	Chordata
TRINITY_DN100196_c2_g1_i2	6927	2778	XP_026132853.1	XP_026132853.1 zinc finger MYM-type protein 1-like [Carassius auratus]	DUF4371 superfamily	1.15e-216	Carassius auratus	Chordata
TRINITY_DN100196_c2_g1_i2	6927	2778	XP_035808652.1	XP_035808652.1 uncharacterized protein LOC111575149 isoform X2 [Amphiprion ocellaris]	DUF4371 superfamily	3.16e-213	Amphiprion ocellaris	Chordata
TRINITY_DN100196_c2_g1_i2	6927	2778	XP_035808650.1	XP_035808650.1 uncharacterized protein LOC111575149 isoform X1 [Amphiprion ocellaris]	DUF4371 superfamily	3.55e-212	Amphiprion ocellaris	Chordata
TRINITY_DN100196_c2_g1_i2	6927	2778	KAF0768179.1	KAF0768179.1 Uncharacterized protein FWK35_00015196 [Aphis craccivora]	DUF4371 superfamily	1.69e-207	Aphis craccivora	Arthropoda
TRINITY_DN100196_c2_g1_i2	6927	2778	XP_034074376.1	XP_034074376.1 uncharacterized protein LOC117547705 [Gymnodraco acuticeps]	DUF4371 superfamily	5.57e-207	Gymnodraco acuticeps	Chordata
TRINITY_DN100196_c2_g1_i2	6927	2778	XP_025208534.1	XP_025208534.1 uncharacterized protein LOC112603919 [Melanaphis sacchari]	DUF4371 superfamily	3.04e-198	Melanaphis sacchari	Arthropoda
TRINITY_DN100196_c2_g1_i2	6927	2778	XP_034073709.1	XP_034073709.1 uncharacterized protein LOC117547231 [Gymnodraco acuticeps]	DUF4371 superfamily	1.52e-192	Gymnodraco acuticeps	Chordata
TRINITY_DN100196_c2_g1_i2	6927	2778	KAF0714044.1	KAF0714044.1 Zinc finger MYM-type protein 1, partial [Aphis craccivora]	DUF4371 superfamily	1.11e-189	Aphis craccivora	Arthropoda
TRINITY_DN100196_c2_g1_i2	6927	2778	XP_034051779.1	XP_034051779.1 uncharacterized protein LOC117532559 [Gymnodraco acuticeps]	DUF4371 superfamily	3.22e-182	Gymnodraco acuticeps	Chordata
TRINITY_DN100196_c2_g1_i2	6927	2778	KAF0746597.1	KAF0746597.1 Uncharacterized protein FWK35_00030574 [Aphis craccivora]	DUF4371 superfamily	4.13e-182	Aphis craccivora	Arthropoda
TRINITY_DN99100_c2_g1_i3	1019	1736	KAF7458978.1	KAF7458978.1 Polyubiquitin-B isoform 2 [Cryptosporidium felis]	Ubl_ubiquitin	5.35e-64	Cryptosporidium felis	Apicomplexa
TRINITY_DN99100_c2_g1_i3	1019	1736	XP_021563786.1	XP_021563786.1 polyubiquitin isoform X2 [Carlito syrichta]	Ubl_ubiquitin	1.02e-62	Carlito syrichta	Chordata
TRINITY_DN99100_c2_g1_i3	1019	1736	AAO73559.1	AAO73559.1 polyubiquitin, partial [Anas platyrhynchos]	Ubl_ubiquitin	1.38e-62	Anas platyrhynchos	Chordata
TRINITY_DN99100_c2_g1_i3	1019	1736	XP_010839571.1	XP_010839571.1 PREDICTED: polyubiquitin-C [Bison bison bison]	Ubl_ubiquitin	1.4e-62	Bison bison bison	Chordata
TRINITY_DN99100_c2_g1_i3	1019	1736	XP_023250964.1	XP_023250964.1 ubiquitin, partial [Seriola lalandi dorsalis]	Ubl_ubiquitin	1.62e-62	Seriola lalandi dorsalis	Chordata
TRINITY_DN99100_c2_g1_i3	1019	1736	WP_206198175.1	WP_206198175.1 hypothetical protein, partial [Shimia sediminis]	Ubl_ubiquitin	1.77e-62	Shimia sediminis	Proteobacteria
TRINITY_DN99100_c2_g1_i3	1019	1736	KZR98643.1	KZR98643.1 Polyubiquitin-B, partial [Daphnia magna]	Ubl_ubiquitin	1.84e-62	Daphnia magna	Arthropoda
TRINITY_DN99100_c2_g1_i3	1019	1736	XP_010830642.1	XP_010830642.1 PREDICTED: ubiquitin, partial [Bison bison bison]	Ubl_ubiquitin	1.9e-62	Bison bison bison	Chordata
TRINITY_DN99100_c2_g1_i3	1019	1736	XP_008506369.1	XP_008506369.1 PREDICTED: polyubiquitin, partial [Equus przewalskii]	Ubl_ubiquitin	2.37e-62	Equus przewalskii	Chordata
TRINITY_DN99100_c2_g1_i3	1019	1736	XP_017315121.1	XP_017315121.1 PREDICTED: polyubiquitin-B isoform X3 [Ictalurus punctatus]	Ubl_ubiquitin	2.37e-62	Schistosoma japonicum;Ictalurus punctatus	Chordata
TRINITY_DN99100_c2_g1_i3	1019	1736	WP_215902204.1	WP_215902204.1 hypothetical protein [Acinetobacter baumannii]	Ubl_ubiquitin	2.42e-62	Acinetobacter baumannii	Proteobacteria
TRINITY_DN99100_c2_g1_i3	1019	1736	XP_009689464.1	XP_009689464.1 ubiquitin [Theileria orientalis strain Shintoku]	Ubl_ubiquitin	2.53e-62	Theileria orientalis strain Shintoku	Apicomplexa
TRINITY_DN99100_c2_g1_i3	1019	1736	NXG08207.1	NXG08207.1 UBIQP protein [Sakesphorus luctuosus]	Ubl_ubiquitin	2.76e-62	Sakesphorus luctuosus	Chordata
TRINITY_DN99100_c2_g1_i3	1019	1736	CAF5191627.1	CAF5191627.1 unnamed protein product, partial [Rotaria sp. Silwood1]	Ubl_ubiquitin	3.01e-62	Rotaria sp. Silwood1	Rotifera
TRINITY_DN99100_c2_g1_i3	1019	1736	NXU11303.1	NXU11303.1 UBB protein [Pardalotus punctatus]	Ubl_ubiquitin	3.04e-62	Pardalotus punctatus	Chordata
TRINITY_DN99100_c2_g1_i3	1019	1736	NWT67903.1	NWT67903.1 UBB protein [Prunella himalayana]	Ubl_ubiquitin	3.24e-62	Prunella himalayana	Chordata
TRINITY_DN99100_c2_g1_i3	1019	1736	XP_025858256.1	XP_025858256.1 ubiquitin, partial [Vulpes vulpes]	Ubl_ubiquitin	3.24e-62	Vulpes vulpes	Chordata
TRINITY_DN99100_c2_g1_i3	1019	1736	NXH21727.1	NXH21727.1 UBIQP protein [Bucco capensis]	Ubl_ubiquitin	3.35e-62	Bucco capensis	Chordata
TRINITY_DN99100_c2_g1_i3	1019	1736	NXP24380.1	NXP24380.1 UBIQP protein [Scytalopus superciliaris]	Ubl_ubiquitin	3.35e-62	Scytalopus superciliaris	Chordata
TRINITY_DN99100_c2_g1_i3	1019	1736	NXA82862.1	NXA82862.1 UBIQP protein [Thryothorus ludovicianus]	Ubl_ubiquitin	3.46e-62	Thryothorus ludovicianus	Chordata
TRINITY_DN100054_c0_g1_i3	3485	1724	XP_007885558.1	XP_007885558.1 cohesin subunit SA-1a [Callorhinchus milii]	#N/A	6.14e-12	Callorhinchus milii	Chordata
TRINITY_DN100054_c0_g1_i3	3485	1724	CAB0036550.1	CAB0036550.1 unnamed protein product [Trichogramma brassicae]	#N/A	9.8e-12	Trichogramma brassicae	Arthropoda
TRINITY_DN100054_c0_g1_i3	3485	1724	XP_041066801.1	XP_041066801.1 cohesin subunit SA-1 isoform X2 [Carcharodon carcharias]	#N/A	1.06e-11	Carcharodon carcharias	Chordata
TRINITY_DN100054_c0_g1_i3	3485	1724	GCC32335.1	GCC32335.1 hypothetical protein [Chiloscyllium punctatum]	#N/A	1.1e-11	Chiloscyllium punctatum	Chordata
TRINITY_DN100054_c0_g1_i3	3485	1724	KAE8604908.1	KAE8604908.1 hypothetical protein XENTR_v10014887 [Xenopus tropicalis]	#N/A	1.36e-11	Xenopus tropicalis	Chordata
TRINITY_DN100054_c0_g1_i3	3485	1724	XP_041419895.1	XP_041419895.1 cohesin subunit SA-1 isoform X2 [Xenopus laevis]	#N/A	1.37e-11	Xenopus laevis	Chordata
TRINITY_DN100054_c0_g1_i3	3485	1724	KAE8604907.1	KAE8604907.1 hypothetical protein XENTR_v10014887 [Xenopus tropicalis]	#N/A	1.39e-11	Xenopus tropicalis	Chordata
TRINITY_DN100054_c0_g1_i3	3485	1724	NP_001083864.1	NP_001083864.1 cohesin subunit SA-1 [Xenopus laevis]	#N/A	1.39e-11	Xenopus laevis	Chordata
TRINITY_DN100054_c0_g1_i3	3485	1724	XP_041419892.1	XP_041419892.1 cohesin subunit SA-1 isoform X1 [Xenopus laevis]	#N/A	1.39e-11	Xenopus laevis	Chordata
TRINITY_DN100054_c0_g1_i3	3485	1724	XP_012825569.1	XP_012825569.1 cohesin subunit SA-1 isoform X1 [Xenopus tropicalis]	#N/A	1.39e-11	Xenopus tropicalis	Chordata
TRINITY_DN100054_c0_g1_i3	3485	1724	NP_001121432.1	NP_001121432.1 cohesin subunit SA-1 [Xenopus tropicalis]	#N/A	1.39e-11	Xenopus tropicalis	Chordata
TRINITY_DN100054_c0_g1_i3	3485	1724	XP_032520851.1	XP_032520851.1 cohesin subunit SA-1 isoform X2 [Danaus plexippus plexippus]	#N/A	1.75e-11	Danaus plexippus plexippus	Arthropoda
TRINITY_DN100054_c0_g1_i3	3485	1724	NP_001089577.1	NP_001089577.1 Cohesin subunit SA-1-like [Xenopus laevis]	#N/A	2.39e-11	Xenopus laevis	Chordata
TRINITY_DN100054_c0_g1_i3	3485	1724	XP_032520849.1	XP_032520849.1 cohesin subunit SA-1 isoform X1 [Danaus plexippus plexippus]	#N/A	3.01e-11	Danaus plexippus plexippus	Arthropoda
TRINITY_DN100054_c0_g1_i3	3485	1724	XP_034831619.1	XP_034831619.1 cohesin subunit SA-1 isoform X1 [Maniola hyperantus]	#N/A	3.96e-11	Maniola hyperantus	Arthropoda
TRINITY_DN100054_c0_g1_i3	3485	1724	GCB73958.1	GCB73958.1 hypothetical protein [Scyliorhinus torazame]	#N/A	4.11e-11	Scyliorhinus torazame	Chordata
TRINITY_DN100054_c0_g1_i3	3485	1724	XP_038671893.1	XP_038671893.1 cohesin subunit SA-1a [Scyliorhinus canicula]	#N/A	4.11e-11	Scyliorhinus canicula	Chordata
TRINITY_DN100054_c0_g1_i3	3485	1724	XP_020388717.1	XP_020388717.1 cohesin subunit SA-1 isoform X2 [Rhincodon typus]	#N/A	4.81e-11	Rhincodon typus	Chordata
TRINITY_DN100054_c0_g1_i3	3485	1724	XP_039755567.1	XP_039755567.1 cohesin subunit SA-1 isoform X2 [Pararge aegeria]	#N/A	5.18e-11	Pararge aegeria	Arthropoda
TRINITY_DN100054_c0_g1_i3	3485	1724	XP_039755566.1	XP_039755566.1 cohesin subunit SA-1 isoform X1 [Pararge aegeria]	#N/A	5.32e-11	Pararge aegeria	Arthropoda
TRINITY_DN97978_c0_g1_i1	6608	1462	GFO00947.1	GFO00947.1 hypothetical protein PoB_002745200 [Plakobranchus ocellatus]	#N/A	1.46e-45	Plakobranchus ocellatus	Mollusca
TRINITY_DN97978_c0_g1_i1	6608	1462	XP_028977882.2	XP_028977882.2 uncharacterized protein LOC106023908 isoform X3 [Esox lucius]	#N/A	1.31e-40	Esox lucius	Chordata
TRINITY_DN97978_c0_g1_i1	6608	1462	XP_034149923.1	XP_034149923.1 uncharacterized protein LOC106023908 isoform X2 [Esox lucius]	#N/A	1.45e-40	Esox lucius	Chordata
TRINITY_DN97978_c0_g1_i1	6608	1462	XP_028977877.2	XP_028977877.2 uncharacterized protein LOC106023908 isoform X1 [Esox lucius]	#N/A	1.49e-40	Esox lucius	Chordata
TRINITY_DN97978_c0_g1_i1	6608	1462	KAF4113119.1	KAF4113119.1 hypothetical protein G5714_005664 [Onychostoma macrolepis]	#N/A	7.12e-32	Onychostoma macrolepis	Chordata
TRINITY_DN97978_c0_g1_i1	6608	1462	XP_028977884.2	XP_028977884.2 uncharacterized protein LOC106023908 isoform X5 [Esox lucius]	#N/A	2.65e-29	Esox lucius	Chordata
TRINITY_DN97978_c0_g1_i1	6608	1462	XP_028977883.2	XP_028977883.2 uncharacterized protein LOC106023908 isoform X4 [Esox lucius]	#N/A	2.77e-29	Esox lucius	Chordata
TRINITY_DN97978_c0_g1_i1	6608	1462	KAF4527376.1	KAF4527376.1 hypothetical protein B566_EDAN017689 [Ephemera danica]	#N/A	3.24e-29	Ephemera danica	Arthropoda
TRINITY_DN97978_c0_g1_i1	6608	1462	XP_013765697.1	XP_013765697.1 PREDICTED: uncharacterized protein LOC102206749 isoform X3 [Pundamilia nyererei]	#N/A	9.46e-29	Pundamilia nyererei	Chordata
TRINITY_DN97978_c0_g1_i1	6608	1462	XP_013765696.1	XP_013765696.1 PREDICTED: uncharacterized protein LOC102206749 isoform X2 [Pundamilia nyererei]	#N/A	4.84e-28	Pundamilia nyererei	Chordata
TRINITY_DN97978_c0_g1_i1	6608	1462	XP_005730686.1	XP_005730686.1 PREDICTED: uncharacterized protein LOC102206749 isoform X1 [Pundamilia nyererei]	#N/A	4.84e-28	Pundamilia nyererei	Chordata
TRINITY_DN97978_c0_g1_i1	6608	1462	XP_037073445.1	XP_037073445.1 uncharacterized protein LOC119094489 [Pollicipes pollicipes]	#N/A	5.84e-28	Pollicipes pollicipes	Arthropoda
TRINITY_DN97978_c0_g1_i1	6608	1462	XP_042072640.1	XP_042072640.1 uncharacterized protein LOC102302645 isoform X3 [Haplochromis burtoni]	#N/A	1.2e-27	Haplochromis burtoni	Chordata
TRINITY_DN97978_c0_g1_i1	6608	1462	XP_037073053.1	XP_037073053.1 uncharacterized protein LOC119094078 [Pollicipes pollicipes]	#N/A	1.35e-27	Pollicipes pollicipes	Arthropoda
TRINITY_DN97978_c0_g1_i1	6608	1462	XP_039906311.1	XP_039906311.1 uncharacterized protein LOC120745477 isoform X3 [Simochromis diagramma]	#N/A	2.71e-27	Simochromis diagramma	Chordata
TRINITY_DN97978_c0_g1_i1	6608	1462	XP_039463806.1	XP_039463806.1 uncharacterized protein LOC116330566 [Oreochromis aureus]	#N/A	5.81e-27	Oreochromis aureus	Chordata
TRINITY_DN97978_c0_g1_i1	6608	1462	XP_005952078.1	XP_005952078.1 uncharacterized protein LOC102302645 isoform X1 [Haplochromis burtoni]	#N/A	6.12e-27	Haplochromis burtoni	Chordata
TRINITY_DN97978_c0_g1_i1	6608	1462	XP_037069748.1	XP_037069748.1 uncharacterized protein LOC119091201 [Pollicipes pollicipes]	#N/A	7.16e-27	Pollicipes pollicipes	Arthropoda
TRINITY_DN97978_c0_g1_i1	6608	1462	XP_026042776.1	XP_026042776.1 uncharacterized protein LOC113033311 isoform X2 [Astatotilapia calliptera]	#N/A	7.98e-27	Astatotilapia calliptera	Chordata
TRINITY_DN97978_c0_g1_i1	6608	1462	XP_004566706.1	XP_004566706.1 uncharacterized protein LOC101474547 isoform X3 [Maylandia zebra]	#N/A	1.05e-26	Maylandia zebra	Chordata
TRINITY_DN98076_c1_g3_i2	4848	1188	XP_040185825.1	XP_040185825.1 zinc finger MYM-type protein 1-like [Rana temporaria]	DUF4371 superfamily	1.82e-198	Rana temporaria	Chordata
TRINITY_DN98076_c1_g3_i2	4848	1188	XP_040264864.1	XP_040264864.1 zinc finger MYM-type protein 1-like [Bufo bufo]	DUF4371 superfamily	9.79e-198	Bufo bufo	Chordata
TRINITY_DN98076_c1_g3_i2	4848	1188	XP_040286084.1	XP_040286084.1 zinc finger MYM-type protein 1-like [Bufo bufo]	DUF4371 superfamily	2.69e-197	Bufo bufo	Chordata
TRINITY_DN98076_c1_g3_i2	4848	1188	XP_040275700.1	XP_040275700.1 zinc finger MYM-type protein 1-like [Bufo bufo]	DUF4371 superfamily	2.69e-197	Bufo bufo	Chordata
TRINITY_DN98076_c1_g3_i2	4848	1188	XP_040285838.1	XP_040285838.1 zinc finger MYM-type protein 1-like [Bufo bufo]	DUF4371 superfamily	3.77e-197	Bufo bufo	Chordata
TRINITY_DN98076_c1_g3_i2	4848	1188	XP_041439825.1	XP_041439825.1 zinc finger MYM-type protein 1-like [Xenopus laevis]	DUF4371 superfamily	4.11e-197	Xenopus laevis	Chordata
TRINITY_DN98076_c1_g3_i2	4848	1188	XP_040271600.1	XP_040271600.1 zinc finger MYM-type protein 1-like [Bufo bufo]	DUF4371 superfamily	5.32e-197	Bufo bufo	Chordata
TRINITY_DN98076_c1_g3_i2	4848	1188	XP_041437174.1	XP_041437174.1 zinc finger MYM-type protein 1-like [Xenopus laevis]	DUF4371 superfamily	1.17e-196	Xenopus laevis	Chordata
TRINITY_DN98076_c1_g3_i2	4848	1188	XP_040275816.1	XP_040275816.1 zinc finger MYM-type protein 1-like [Bufo bufo]	DUF4371 superfamily	7.8e-196	Bufo bufo	Chordata
TRINITY_DN98076_c1_g3_i2	4848	1188	XP_041434247.1	XP_041434247.1 zinc finger MYM-type protein 1-like [Xenopus laevis]	DUF4371 superfamily	1.23e-195	Xenopus laevis	Chordata
TRINITY_DN98076_c1_g3_i2	4848	1188	KAG8582256.1	KAG8582256.1 hypothetical protein GDO81_007971 [Engystomops pustulosus]	DUF4371 superfamily	5.05e-195	Engystomops pustulosus	Chordata
TRINITY_DN98076_c1_g3_i2	4848	1188	XP_040289897.1	XP_040289897.1 zinc finger MYM-type protein 1-like [Bufo bufo]	DUF4371 superfamily	1.15e-194	Bufo bufo	Chordata
TRINITY_DN98076_c1_g3_i2	4848	1188	XP_017948164.1	XP_017948164.1 zinc finger MYM-type protein 1 [Xenopus tropicalis]	DUF4371 superfamily	1.14e-193	Xenopus tropicalis	Chordata
TRINITY_DN98076_c1_g3_i2	4848	1188	XP_040271831.1	XP_040271831.1 zinc finger MYM-type protein 1-like [Bufo bufo]	DUF4371 superfamily	1.13e-192	Bufo bufo	Chordata
TRINITY_DN98076_c1_g3_i2	4848	1188	XP_029435922.1	XP_029435922.1 zinc finger MYM-type protein 1-like [Rhinatrema bivittatum]	DUF4371 superfamily	3.1e-192	Rhinatrema bivittatum	Chordata
TRINITY_DN98076_c1_g3_i2	4848	1188	XP_029466585.1	XP_029466585.1 zinc finger MYM-type protein 1-like [Rhinatrema bivittatum]	DUF4371 superfamily	4.7e-191	Rhinatrema bivittatum	Chordata
TRINITY_DN98076_c1_g3_i2	4848	1188	XP_029435762.1	XP_029435762.1 zinc finger MYM-type protein 1-like [Rhinatrema bivittatum]	DUF4371 superfamily	1.35e-189	Rhinatrema bivittatum	Chordata
TRINITY_DN98076_c1_g3_i2	4848	1188	KAG8444242.1	KAG8444242.1 hypothetical protein GDO86_009431 [Hymenochirus boettgeri]	DUF4371 superfamily	6.95e-188	Hymenochirus boettgeri	Chordata
TRINITY_DN98076_c1_g3_i2	4848	1188	XP_029434034.1	XP_029434034.1 zinc finger MYM-type protein 1-like [Rhinatrema bivittatum]	DUF4371 superfamily	3.87e-174	Rhinatrema bivittatum	Chordata
TRINITY_DN98076_c1_g3_i2	4848	1188	XP_025408958.1	XP_025408958.1 zinc finger MYM-type protein 1-like [Sipha flava]	DUF4371 superfamily	1.44e-169	Sipha flava	Arthropoda
TRINITY_DN100297_c0_g2_i1	2390	1068	XP_033729773.1	XP_033729773.1 uncharacterized protein K02A2.6-like [Pecten maximus]	RT_LTR	7.92e-264	Pecten maximus	Mollusca
TRINITY_DN100297_c0_g2_i1	2390	1068	TWW71409.1	TWW71409.1 Retrovirus-related Pol polyprotein from transposon opus [Takifugu flavidus]	RT_LTR	6.44e-263	Takifugu flavidus	Chordata
TRINITY_DN100297_c0_g2_i1	2390	1068	XP_038155306.1	XP_038155306.1 uncharacterized protein K02A2.6-like [Cyprinodon tularosa]	RT_LTR	7.67e-261	Cyprinodon tularosa	Chordata
TRINITY_DN100297_c0_g2_i1	2390	1068	XP_019204182.1	XP_019204182.1 uncharacterized protein LOC106097043 [Oreochromis niloticus]	RT_LTR	2.63e-260	Oreochromis niloticus	Chordata
TRINITY_DN100297_c0_g2_i1	2390	1068	KAG1925385.1	KAG1925385.1 retrotransposable element, partial [Pimephales promelas]	RT_LTR	1.69e-259	Pimephales promelas	Chordata
TRINITY_DN100297_c0_g2_i1	2390	1068	XP_036001498.1	XP_036001498.1 uncharacterized protein K02A2.6-like [Fundulus heteroclitus]	RT_LTR	3.41e-258	Fundulus heteroclitus	Chordata
TRINITY_DN100297_c0_g2_i1	2390	1068	XP_035809138.1	XP_035809138.1 uncharacterized protein K02A2.6-like [Amphiprion ocellaris]	RT_LTR	2.93e-257	Amphiprion ocellaris	Chordata
TRINITY_DN100297_c0_g2_i1	2390	1068	XP_027864509.1	XP_027864509.1 uncharacterized protein K02A2.6-like [Xiphophorus couchianus]	RT_LTR	6.76e-256	Xiphophorus couchianus	Chordata
TRINITY_DN100297_c0_g2_i1	2390	1068	XP_033728773.1	XP_033728773.1 uncharacterized protein K02A2.6-like [Pecten maximus]	RT_LTR	2.37e-253	Pecten maximus	Mollusca
TRINITY_DN100297_c0_g2_i1	2390	1068	XP_033758306.1	XP_033758306.1 uncharacterized protein K02A2.6-like [Pecten maximus]	RT_LTR	4.71e-253	Pecten maximus	Mollusca
TRINITY_DN100297_c0_g2_i1	2390	1068	XP_033744200.1	XP_033744200.1 uncharacterized protein K02A2.6-like [Pecten maximus]	RT_LTR	9.39e-253	Pecten maximus	Mollusca
TRINITY_DN100297_c0_g2_i1	2390	1068	XP_033730104.1	XP_033730104.1 uncharacterized protein K02A2.6-like [Pecten maximus]	RT_LTR	9.39e-253	Pecten maximus	Mollusca
TRINITY_DN100297_c0_g2_i1	2390	1068	XP_033759763.1	XP_033759763.1 uncharacterized protein K02A2.6-like [Pecten maximus]	RT_LTR	1.33e-252	Pecten maximus	Mollusca
TRINITY_DN100297_c0_g2_i1	2390	1068	XP_033763483.1	XP_033763483.1 uncharacterized protein K02A2.6-like [Pecten maximus]	RT_LTR	2.64e-252	Pecten maximus	Mollusca
TRINITY_DN100297_c0_g2_i1	2390	1068	XP_023814023.1	XP_023814023.1 uncharacterized protein K02A2.6-like [Oryzias latipes]	RT_LTR	4.88e-252	Oryzias latipes	Chordata
TRINITY_DN100297_c0_g2_i1	2390	1068	XP_033724494.1	XP_033724494.1 uncharacterized protein K02A2.6-like [Pecten maximus]	RT_LTR	7.43e-252	Pecten maximus	Mollusca
TRINITY_DN100297_c0_g2_i1	2390	1068	XP_033725227.1	XP_033725227.1 uncharacterized protein K02A2.6-like [Pecten maximus]	RT_LTR	2.95e-251	Pecten maximus	Mollusca
TRINITY_DN100297_c0_g2_i1	2390	1068	XP_037830666.1	XP_037830666.1 uncharacterized protein K02A2.6-like [Kryptolebias marmoratus]	RT_LTR	1.47e-250	Kryptolebias marmoratus	Chordata
TRINITY_DN100297_c0_g2_i1	2390	1068	XP_027868535.1	XP_027868535.1 uncharacterized protein K02A2.6-like [Xiphophorus couchianus]	RT_LTR	1.56e-250	Xiphophorus couchianus	Chordata
TRINITY_DN100297_c0_g2_i1	2390	1068	KAE8281698.1	KAE8281698.1 Retrovirus-related Pol polyprotein from transposon 17.6 Protease [Larimichthys crocea]	RT_LTR	1.6e-250	Larimichthys crocea	Chordata
TRINITY_DN99357_c5_g1_i1	4374	886	XP_008120491.1	XP_008120491.1 PREDICTED: zinc finger MYM-type protein 1 [Anolis carolinensis]	DUF4371 superfamily	0	Anolis carolinensis	Chordata
TRINITY_DN99357_c5_g1_i1	4374	886	XP_016850957.1	XP_016850957.1 PREDICTED: zinc finger MYM-type protein 1-like [Anolis carolinensis]	DUF4371 superfamily	0	Anolis carolinensis	Chordata
TRINITY_DN99357_c5_g1_i1	4374	886	XP_016854909.1	XP_016854909.1 PREDICTED: zinc finger MYM-type protein 1-like [Anolis carolinensis]	DUF4371 superfamily	0	Anolis carolinensis	Chordata
TRINITY_DN99357_c5_g1_i1	4374	886	XP_008122104.2	XP_008122104.2 PREDICTED: zinc finger MYM-type protein 1 isoform X1 [Anolis carolinensis]	DUF4371 superfamily	0	Anolis carolinensis	Chordata
TRINITY_DN99357_c5_g1_i1	4374	886	XP_008122105.2	XP_008122105.2 PREDICTED: zinc finger MYM-type protein 1 isoform X2 [Anolis carolinensis]	DUF4371 superfamily	0	Anolis carolinensis	Chordata
TRINITY_DN99357_c5_g1_i1	4374	886	XP_008113471.1	XP_008113471.1 PREDICTED: zinc finger MYM-type protein 1-like [Anolis carolinensis]	DUF4371 superfamily	0	Anolis carolinensis	Chordata
TRINITY_DN99357_c5_g1_i1	4374	886	XP_003216573.1	XP_003216573.1 PREDICTED: zinc finger MYM-type protein 1-like [Anolis carolinensis]	DUF4371 superfamily	0	Anolis carolinensis	Chordata
TRINITY_DN99357_c5_g1_i1	4374	886	XP_008123338.1	XP_008123338.1 PREDICTED: zinc finger MYM-type protein 1-like [Anolis carolinensis]	DUF4371 superfamily	0	Anolis carolinensis	Chordata
TRINITY_DN99357_c5_g1_i1	4374	886	XP_008106930.1	XP_008106930.1 PREDICTED: zinc finger MYM-type protein 1-like [Anolis carolinensis]	DUF4371 superfamily	3.57e-283	Anolis carolinensis	Chordata
TRINITY_DN99357_c5_g1_i1	4374	886	XP_016846904.1	XP_016846904.1 PREDICTED: zinc finger MYM-type protein 1-like [Anolis carolinensis]	DUF4371 superfamily	4.69e-240	Anolis carolinensis	Chordata
TRINITY_DN99357_c5_g1_i1	4374	886	KAG6438818.1	KAG6438818.1 hypothetical protein O3G_MSEX000250 [Manduca sexta]	DUF4371 superfamily	3.26e-238	Manduca sexta	Arthropoda
TRINITY_DN99357_c5_g1_i1	4374	886	XP_025997681.2	XP_025997681.2 zinc finger MYM-type protein 1 [Solenopsis invicta]	DUF4371 superfamily	1.02e-235	Solenopsis invicta	Arthropoda
TRINITY_DN99357_c5_g1_i1	4374	886	XP_016852373.1	XP_016852373.1 PREDICTED: zinc finger MYM-type protein 1-like [Anolis carolinensis]	DUF4371 superfamily	3.25e-234	Anolis carolinensis	Chordata
TRINITY_DN99357_c5_g1_i1	4374	886	XP_008116309.2	XP_008116309.2 PREDICTED: uncharacterized protein LOC103280141 [Anolis carolinensis]	DUF4371 superfamily	3.21e-232	Anolis carolinensis	Chordata
TRINITY_DN99357_c5_g1_i1	4374	886	XP_040271776.1	XP_040271776.1 zinc finger MYM-type protein 1-like [Bufo bufo]	DUF4371 superfamily	2.91e-225	Bufo bufo	Chordata
TRINITY_DN99357_c5_g1_i1	4374	886	XP_040294291.1	XP_040294291.1 zinc finger MYM-type protein 1-like [Bufo bufo]	DUF4371 superfamily	8.11e-225	Bufo bufo	Chordata
TRINITY_DN99357_c5_g1_i1	4374	886	XP_012269674.2	XP_012269674.2 zinc finger MYM-type protein 1-like [Athalia rosae]	DUF4371 superfamily	1.03e-222	Athalia rosae	Arthropoda
TRINITY_DN99357_c5_g1_i1	4374	886	XP_032997453.1	XP_032997453.1 zinc finger MYM-type protein 1-like [Lacerta agilis]	DUF4371 superfamily	2.54e-222	Lacerta agilis	Chordata
TRINITY_DN99357_c5_g1_i1	4374	886	XP_022166116.1	XP_022166116.1 zinc finger MYM-type protein 1-like [Myzus persicae]	DUF4371 superfamily	5.98e-217	Myzus persicae	Arthropoda
TRINITY_DN99357_c5_g1_i1	4374	886	XP_002163005.2	XP_002163005.2 PREDICTED: zinc finger MYM-type protein 1-like [Hydra vulgaris]	DUF4371 superfamily	1.17e-212	Hydra vulgaris	Cnidaria
TRINITY_DN99755_c1_g1_i1	1945	872	XP_008103963.1	XP_008103963.1 PREDICTED: jerky protein homolog-like isoform X2 [Anolis carolinensis]	rve superfamily	8.59e-248	Anolis carolinensis	Chordata
TRINITY_DN99755_c1_g1_i1	1945	872	XP_016847311.1	XP_016847311.1 PREDICTED: jerky protein homolog-like isoform X1 [Anolis carolinensis]	rve superfamily	1.26e-247	Anolis carolinensis	Chordata
TRINITY_DN99755_c1_g1_i1	1945	872	XP_008119844.1	XP_008119844.1 PREDICTED: jerky protein homolog-like [Anolis carolinensis]	rve superfamily	3.64e-241	Anolis carolinensis	Chordata
TRINITY_DN99755_c1_g1_i1	1945	872	XP_016846335.1	XP_016846335.1 PREDICTED: uncharacterized protein LOC103277513 [Anolis carolinensis]	rve superfamily	5.55e-235	Anolis carolinensis	Chordata
TRINITY_DN99755_c1_g1_i1	1945	872	XP_008119843.1	XP_008119843.1 PREDICTED: zinc finger protein with KRAB and SCAN domains 7 [Anolis carolinensis]	rve superfamily	9.52e-232	Anolis carolinensis	Chordata
TRINITY_DN99755_c1_g1_i1	1945	872	XP_028660410.1	XP_028660410.1 jerky protein homolog-like [Erpetoichthys calabaricus]	rve superfamily	6.27e-206	Erpetoichthys calabaricus	Chordata
TRINITY_DN99755_c1_g1_i1	1945	872	XP_028659020.1	XP_028659020.1 jerky protein homolog-like [Erpetoichthys calabaricus]	rve superfamily	4.3e-201	Erpetoichthys calabaricus	Chordata
TRINITY_DN99755_c1_g1_i1	1945	872	XP_042315488.1	XP_042315488.1 jerky protein homolog-like [Sceloporus undulatus]	rve superfamily	9.83e-194	Sceloporus undulatus	Chordata
TRINITY_DN99755_c1_g1_i1	1945	872	XP_023231971.1	XP_023231971.1 jerky protein homolog-like [Centruroides sculpturatus]	rve superfamily	5.16e-182	Centruroides sculpturatus	Arthropoda
TRINITY_DN99755_c1_g1_i1	1945	872	KAF7249719.1	KAF7249719.1 Plexin-D1 [Varanus komodoensis]	rve superfamily	6.54e-172	Varanus komodoensis	Chordata
TRINITY_DN99755_c1_g1_i1	1945	872	GFU88659.1	GFU88659.1 jerky protein homolog-like [Trichonephila clavipes]	rve superfamily	2.27e-166	Trichonephila clavipes	Arthropoda
TRINITY_DN99755_c1_g1_i1	1945	872	GFR09827.1	GFR09827.1 jerky protein homolog-like [Trichonephila clavata]	rve superfamily	8.33e-164	Trichonephila clavata	Arthropoda
TRINITY_DN99755_c1_g1_i1	1945	872	XP_011861520.1	XP_011861520.1 PREDICTED: jerky protein homolog-like isoform X1 [Vollenhovia emeryi]	rve superfamily	3.66e-163	Vollenhovia emeryi	Arthropoda
TRINITY_DN99755_c1_g1_i1	1945	872	XP_042295721.1	XP_042295721.1 jerky protein homolog-like [Sceloporus undulatus]	rve superfamily	1.12e-162	Sceloporus undulatus	Chordata
TRINITY_DN99755_c1_g1_i1	1945	872	XP_029173702.1	XP_029173702.1 jerky protein homolog-like [Nylanderia fulva]	rve superfamily	5.86e-162	Nylanderia fulva	Arthropoda
TRINITY_DN99755_c1_g1_i1	1945	872	XP_015928749.1	XP_015928749.1 jerky protein homolog-like [Parasteatoda tepidariorum]	rve superfamily	1.86e-154	Parasteatoda tepidariorum	Arthropoda
TRINITY_DN99755_c1_g1_i1	1945	872	GFS84640.1	GFS84640.1 jerky protein homolog-like [Trichonephila clavipes]	rve superfamily	1.24e-149	Trichonephila clavipes	Arthropoda
TRINITY_DN99755_c1_g1_i1	1945	872	GFW28295.1	GFW28295.1 jerky protein homolog-like [Trichonephila clavipes]	rve superfamily	1.64e-149	Trichonephila clavipes	Arthropoda
TRINITY_DN99755_c1_g1_i1	1945	872	GFT00658.1	GFT00658.1 jerky protein homolog-like [Trichonephila clavipes]	rve superfamily	9.29e-149	Trichonephila clavipes	Arthropoda
TRINITY_DN99755_c1_g1_i1	1945	872	XP_029176761.1	XP_029176761.1 jerky protein homolog-like [Nylanderia fulva]	rve superfamily	4.75e-148	Nylanderia fulva	Arthropoda
TRINITY_DN98609_c0_g1_i1	933	822	XP_015919270.1	XP_015919270.1 macrophage mannose receptor 1 [Parasteatoda tepidariorum]	CLECT	9.76e-14	Parasteatoda tepidariorum	Arthropoda
TRINITY_DN98609_c0_g1_i1	933	822	AXL95266.1	AXL95266.1 C-type lectin 2, partial [Spilotes sulphureus]	CLECT	9.96e-12	Spilotes sulphureus	Chordata
TRINITY_DN98609_c0_g1_i1	933	822	XP_027143947.1	XP_027143947.1 galactose-specific lectin nattectin-like isoform X22 [Larimichthys crocea]	CLECT	1.06e-11	Larimichthys crocea	Chordata
TRINITY_DN98609_c0_g1_i1	933	822	XP_027143937.1	XP_027143937.1 galactose-specific lectin nattectin-like isoform X12 [Larimichthys crocea]	CLECT	1.4e-11	Larimichthys crocea	Chordata
TRINITY_DN98609_c0_g1_i1	933	822	XP_027143934.1	XP_027143934.1 type-2 ice-structuring protein-like isoform X9 [Larimichthys crocea]	CLECT	1.59e-11	Larimichthys crocea	Chordata
TRINITY_DN98609_c0_g1_i1	933	822	XP_022054011.1	XP_022054011.1 lactose-binding lectin l-2-like [Acanthochromis polyacanthus]	CLECT	2.5e-11	Acanthochromis polyacanthus	Chordata
TRINITY_DN98609_c0_g1_i1	933	822	XP_027143949.1	XP_027143949.1 galactose-specific lectin nattectin-like isoform X24 [Larimichthys crocea]	CLECT	3.22e-11	Larimichthys crocea	Chordata
TRINITY_DN98609_c0_g1_i1	933	822	XP_027143943.1	XP_027143943.1 galactose-specific lectin nattectin-like isoform X18 [Larimichthys crocea]	CLECT	4.3e-11	Larimichthys crocea	Chordata
TRINITY_DN98609_c0_g1_i1	933	822	XP_027143938.1	XP_027143938.1 galactose-specific lectin nattectin-like isoform X13 [Larimichthys crocea]	CLECT	4.88e-11	Larimichthys crocea	Chordata
TRINITY_DN98609_c0_g1_i1	933	822	XP_027143939.1	XP_027143939.1 galactose-specific lectin nattectin-like isoform X14 [Larimichthys crocea]	CLECT	4.88e-11	Larimichthys crocea	Chordata
TRINITY_DN98609_c0_g1_i1	933	822	XP_027143941.1	XP_027143941.1 galactose-specific lectin nattectin-like isoform X16 [Larimichthys crocea]	CLECT	4.88e-11	Larimichthys crocea	Chordata
TRINITY_DN98609_c0_g1_i1	933	822	XP_027143936.1	XP_027143936.1 type-2 ice-structuring protein-like isoform X11 [Larimichthys crocea]	CLECT	5.5e-11	Larimichthys crocea	Chordata
TRINITY_DN98609_c0_g1_i1	933	822	XP_027143931.1	XP_027143931.1 type-2 ice-structuring protein-like isoform X6 [Larimichthys crocea]	CLECT	6.17e-11	Larimichthys crocea	Chordata
TRINITY_DN98609_c0_g1_i1	933	822	XP_027143930.1	XP_027143930.1 type-2 ice-structuring protein-like isoform X5 [Larimichthys crocea]	CLECT	6.17e-11	Larimichthys crocea	Chordata
TRINITY_DN98609_c0_g1_i1	933	822	XP_027143928.1	XP_027143928.1 type-2 ice-structuring protein-like isoform X3 [Larimichthys crocea]	CLECT	6.26e-11	Larimichthys crocea	Chordata
TRINITY_DN98609_c0_g1_i1	933	822	XP_027143926.1	XP_027143926.1 type-2 ice-structuring protein-like isoform X1 [Larimichthys crocea]	CLECT	6.88e-11	Larimichthys crocea	Chordata
TRINITY_DN98609_c0_g1_i1	933	822	KAF5892351.1	KAF5892351.1 putative C-type lectin domain family 20 member A isoform X1, partial [Clarias magur]	CLECT	9.67e-11	Clarias magur	Chordata
TRINITY_DN98609_c0_g1_i1	933	822	EAT41960.1	EAT41960.1 AAEL006456-PA [Aedes aegypti]	CLECT	1.04e-10	Aedes aegypti	Arthropoda
TRINITY_DN98609_c0_g1_i1	933	822	ACS37721.1	ACS37721.1 C-type lectin-1 [Heligmosomoides polygyrus]	CLECT	1.09e-10	Heligmosomoides polygyrus	Nematoda
TRINITY_DN98609_c0_g1_i1	933	822	XP_027893478.1	XP_027893478.1 type-2 ice-structuring protein-like [Xiphophorus couchianus]	CLECT	1.14e-10	Xiphophorus couchianus	Chordata
TRINITY_DN99610_c0_g1_i4	2535	770	XP_008103963.1	XP_008103963.1 PREDICTED: jerky protein homolog-like isoform X2 [Anolis carolinensis]	rve superfamily	1.04e-173	Anolis carolinensis	Chordata
TRINITY_DN99610_c0_g1_i4	2535	770	XP_016847311.1	XP_016847311.1 PREDICTED: jerky protein homolog-like isoform X1 [Anolis carolinensis]	rve superfamily	1.47e-173	Anolis carolinensis	Chordata
TRINITY_DN99610_c0_g1_i4	2535	770	XP_008119844.1	XP_008119844.1 PREDICTED: jerky protein homolog-like [Anolis carolinensis]	rve superfamily	8.65e-167	Anolis carolinensis	Chordata
TRINITY_DN99610_c0_g1_i4	2535	770	XP_011861520.1	XP_011861520.1 PREDICTED: jerky protein homolog-like isoform X1 [Vollenhovia emeryi]	rve superfamily	8.58e-164	Vollenhovia emeryi	Arthropoda
TRINITY_DN99610_c0_g1_i4	2535	770	KAF7249719.1	KAF7249719.1 Plexin-D1 [Varanus komodoensis]	rve superfamily	2.36e-162	Varanus komodoensis	Chordata
TRINITY_DN99610_c0_g1_i4	2535	770	XP_016846335.1	XP_016846335.1 PREDICTED: uncharacterized protein LOC103277513 [Anolis carolinensis]	rve superfamily	5.22e-162	Anolis carolinensis	Chordata
TRINITY_DN99610_c0_g1_i4	2535	770	XP_029173702.1	XP_029173702.1 jerky protein homolog-like [Nylanderia fulva]	rve superfamily	7.63e-162	Nylanderia fulva	Arthropoda
TRINITY_DN99610_c0_g1_i4	2535	770	XP_008119843.1	XP_008119843.1 PREDICTED: zinc finger protein with KRAB and SCAN domains 7 [Anolis carolinensis]	rve superfamily	1.49e-157	Anolis carolinensis	Chordata
TRINITY_DN99610_c0_g1_i4	2535	770	XP_015928749.1	XP_015928749.1 jerky protein homolog-like [Parasteatoda tepidariorum]	rve superfamily	1.09e-154	Parasteatoda tepidariorum	Arthropoda
TRINITY_DN99610_c0_g1_i4	2535	770	XP_029176761.1	XP_029176761.1 jerky protein homolog-like [Nylanderia fulva]	rve superfamily	5.09e-151	Nylanderia fulva	Arthropoda
TRINITY_DN99610_c0_g1_i4	2535	770	XP_023231971.1	XP_023231971.1 jerky protein homolog-like [Centruroides sculpturatus]	rve superfamily	5.79e-149	Centruroides sculpturatus	Arthropoda
TRINITY_DN99610_c0_g1_i4	2535	770	VEN49859.1	VEN49859.1 unnamed protein product [Callosobruchus maculatus]	rve superfamily	4.91e-147	Callosobruchus maculatus	Arthropoda
TRINITY_DN99610_c0_g1_i4	2535	770	VEN42838.1	VEN42838.1 unnamed protein product [Callosobruchus maculatus]	rve superfamily	9.76e-147	Callosobruchus maculatus	Arthropoda
TRINITY_DN99610_c0_g1_i4	2535	770	VEN43486.1	VEN43486.1 unnamed protein product [Callosobruchus maculatus]	rve superfamily	2.74e-146	Callosobruchus maculatus	Arthropoda
TRINITY_DN99610_c0_g1_i4	2535	770	XP_018574376.1	XP_018574376.1 jerky protein homolog-like [Anoplophora glabripennis]	rve superfamily	7.44e-146	Anoplophora glabripennis	Arthropoda
TRINITY_DN99610_c0_g1_i4	2535	770	XP_028664086.1	XP_028664086.1 jerky protein homolog-like [Erpetoichthys calabaricus]	rve superfamily	7.82e-143	Erpetoichthys calabaricus	Chordata
TRINITY_DN99610_c0_g1_i4	2535	770	XP_001944491.1	XP_001944491.1 jerky protein homolog-like [Acyrthosiphon pisum]	rve superfamily	5.83e-142	Acyrthosiphon pisum	Arthropoda
TRINITY_DN99610_c0_g1_i4	2535	770	XP_028648386.1	XP_028648386.1 jerky protein homolog-like [Erpetoichthys calabaricus]	rve superfamily	3.31e-141	Erpetoichthys calabaricus	Chordata
TRINITY_DN99610_c0_g1_i4	2535	770	XP_028681081.1	XP_028681081.1 jerky protein homolog-like [Erpetoichthys calabaricus]	rve superfamily	4.82e-141	Erpetoichthys calabaricus	Chordata
TRINITY_DN99610_c0_g1_i4	2535	770	XP_028674359.1	XP_028674359.1 jerky protein homolog-like [Erpetoichthys calabaricus]	rve superfamily	7.02e-141	Erpetoichthys calabaricus	Chordata
TRINITY_DN99884_c1_g2_i1	3725	712	XP_014639618.1	XP_014639618.1 PREDICTED: zinc finger MYM-type protein 1 isoform X4 [Ceratotherium simum simum]	DUF4371 superfamily	1.56e-217	Ceratotherium simum simum	Chordata
TRINITY_DN99884_c1_g2_i1	3725	712	XP_014639617.1	XP_014639617.1 PREDICTED: zinc finger MYM-type protein 1 isoform X3 [Ceratotherium simum simum]	DUF4371 superfamily	1.17e-214	Ceratotherium simum simum	Chordata
TRINITY_DN99884_c1_g2_i1	3725	712	XP_034504874.1	XP_034504874.1 zinc finger MYM-type protein 1 isoform X5 [Ailuropoda melanoleuca]	DUF4371 superfamily	2.19e-214	Ailuropoda melanoleuca	Chordata
TRINITY_DN99884_c1_g2_i1	3725	712	XP_030883166.1	XP_030883166.1 zinc finger MYM-type protein 1 isoform X5 [Leptonychotes weddellii]	DUF4371 superfamily	3.08e-214	Leptonychotes weddellii	Chordata
TRINITY_DN99884_c1_g2_i1	3725	712	XP_041594714.1	XP_041594714.1 zinc finger MYM-type protein 1 isoform X4 [Vulpes lagopus]	DUF4371 superfamily	5.93e-214	Vulpes lagopus	Chordata
TRINITY_DN99884_c1_g2_i1	3725	712	XP_025847567.1	XP_025847567.1 zinc finger MYM-type protein 1 isoform X4 [Vulpes vulpes]	DUF4371 superfamily	1.03e-213	Vulpes vulpes	Chordata
TRINITY_DN99884_c1_g2_i1	3725	712	XP_014639616.1	XP_014639616.1 PREDICTED: zinc finger MYM-type protein 1 isoform X2 [Ceratotherium simum simum]	DUF4371 superfamily	1.11e-213	Ceratotherium simum simum	Chordata
TRINITY_DN99884_c1_g2_i1	3725	712	XP_035921199.1	XP_035921199.1 zinc finger MYM-type protein 1 isoform X5 [Halichoerus grypus]	DUF4371 superfamily	1.21e-213	Halichoerus grypus	Chordata
TRINITY_DN99884_c1_g2_i1	3725	712	XP_012497696.1	XP_012497696.1 PREDICTED: zinc finger MYM-type protein 1 isoform X2 [Propithecus coquereli]	DUF4371 superfamily	1.3e-213	Propithecus coquereli	Chordata
TRINITY_DN99884_c1_g2_i1	3725	712	XP_034504884.1	XP_034504884.1 zinc finger MYM-type protein 1 isoform X6 [Ailuropoda melanoleuca]	DUF4371 superfamily	1.52e-213	Ailuropoda melanoleuca	Chordata
TRINITY_DN99884_c1_g2_i1	3725	712	XP_025847566.1	XP_025847566.1 zinc finger MYM-type protein 1 isoform X3 [Vulpes vulpes]	DUF4371 superfamily	1.66e-213	Vulpes vulpes	Chordata
TRINITY_DN99884_c1_g2_i1	3725	712	KAF5910354.1	KAF5910354.1 hypothetical protein HPG69_014586 [Diceros bicornis minor]	DUF4371 superfamily	1.69e-213	Diceros bicornis minor	Chordata
TRINITY_DN99884_c1_g2_i1	3725	712	XP_004425988.2	XP_004425988.2 PREDICTED: zinc finger MYM-type protein 1 isoform X1 [Ceratotherium simum simum]	DUF4371 superfamily	1.69e-213	Ceratotherium simum simum	Chordata
TRINITY_DN99884_c1_g2_i1	3725	712	XP_034875035.1	XP_034875035.1 zinc finger MYM-type protein 1 isoform X4 [Mirounga leonina]	DUF4371 superfamily	3.39e-213	Mirounga leonina	Chordata
TRINITY_DN99884_c1_g2_i1	3725	712	XP_030883165.1	XP_030883165.1 zinc finger MYM-type protein 1 isoform X4 [Leptonychotes weddellii]	DUF4371 superfamily	3.83e-213	Leptonychotes weddellii	Chordata
TRINITY_DN99884_c1_g2_i1	3725	712	XP_037355956.1	XP_037355956.1 zinc finger MYM-type protein 1 isoform X4 [Talpa occidentalis]	DUF4371 superfamily	5.17e-213	Talpa occidentalis	Chordata
TRINITY_DN99884_c1_g2_i1	3725	712	XP_025712529.1	XP_025712529.1 zinc finger MYM-type protein 1 isoform X7 [Callorhinus ursinus]	DUF4371 superfamily	5.92e-213	Zalophus californianus;Callorhinus ursinus;Eumetopias jubatus	Chordata
TRINITY_DN99884_c1_g2_i1	3725	712	XP_040475173.1	XP_040475173.1 zinc finger MYM-type protein 1 isoform X5 [Ursus maritimus]	DUF4371 superfamily	6.53e-213	Ursus maritimus	Chordata
TRINITY_DN99884_c1_g2_i1	3725	712	XP_032244119.1	XP_032244119.1 zinc finger MYM-type protein 1 isoform X5 [Phoca vitulina]	DUF4371 superfamily	6.74e-213	Phoca vitulina	Chordata
TRINITY_DN99884_c1_g2_i1	3725	712	XP_023583022.1	XP_023583022.1 zinc finger MYM-type protein 1 isoform X2 [Trichechus manatus latirostris]	DUF4371 superfamily	9.37e-213	Trichechus manatus latirostris	Chordata
TRINITY_DN98952_c0_g11_i3	2129	590	XP_008103963.1	XP_008103963.1 PREDICTED: jerky protein homolog-like isoform X2 [Anolis carolinensis]	rve superfamily	3.08e-218	Anolis carolinensis	Chordata
TRINITY_DN98952_c0_g11_i3	2129	590	XP_016847311.1	XP_016847311.1 PREDICTED: jerky protein homolog-like isoform X1 [Anolis carolinensis]	rve superfamily	4.46e-218	Anolis carolinensis	Chordata
TRINITY_DN98952_c0_g11_i3	2129	590	XP_008119844.1	XP_008119844.1 PREDICTED: jerky protein homolog-like [Anolis carolinensis]	rve superfamily	7.22e-217	Anolis carolinensis	Chordata
TRINITY_DN98952_c0_g11_i3	2129	590	XP_008119843.1	XP_008119843.1 PREDICTED: zinc finger protein with KRAB and SCAN domains 7 [Anolis carolinensis]	rve superfamily	4.09e-206	Anolis carolinensis	Chordata
TRINITY_DN98952_c0_g11_i3	2129	590	XP_016846335.1	XP_016846335.1 PREDICTED: uncharacterized protein LOC103277513 [Anolis carolinensis]	rve superfamily	6.92e-206	Anolis carolinensis	Chordata
TRINITY_DN98952_c0_g11_i3	2129	590	KAF7249719.1	KAF7249719.1 Plexin-D1 [Varanus komodoensis]	rve superfamily	3.27e-179	Varanus komodoensis	Chordata
TRINITY_DN98952_c0_g11_i3	2129	590	XP_023231971.1	XP_023231971.1 jerky protein homolog-like [Centruroides sculpturatus]	rve superfamily	2.08e-178	Centruroides sculpturatus	Arthropoda
TRINITY_DN98952_c0_g11_i3	2129	590	XP_028659020.1	XP_028659020.1 jerky protein homolog-like [Erpetoichthys calabaricus]	rve superfamily	2.15e-178	Erpetoichthys calabaricus	Chordata
TRINITY_DN98952_c0_g11_i3	2129	590	XP_028660410.1	XP_028660410.1 jerky protein homolog-like [Erpetoichthys calabaricus]	rve superfamily	2.16e-178	Erpetoichthys calabaricus	Chordata
TRINITY_DN98952_c0_g11_i3	2129	590	XP_042315488.1	XP_042315488.1 jerky protein homolog-like [Sceloporus undulatus]	rve superfamily	9.64e-173	Sceloporus undulatus	Chordata
TRINITY_DN98952_c0_g11_i3	2129	590	XP_011861520.1	XP_011861520.1 PREDICTED: jerky protein homolog-like isoform X1 [Vollenhovia emeryi]	rve superfamily	5.91e-164	Vollenhovia emeryi	Arthropoda
TRINITY_DN98952_c0_g11_i3	2129	590	XP_029173702.1	XP_029173702.1 jerky protein homolog-like [Nylanderia fulva]	rve superfamily	9.45e-163	Nylanderia fulva	Arthropoda
TRINITY_DN98952_c0_g11_i3	2129	590	XP_015928749.1	XP_015928749.1 jerky protein homolog-like [Parasteatoda tepidariorum]	rve superfamily	1.24e-162	Parasteatoda tepidariorum	Arthropoda
TRINITY_DN98952_c0_g11_i3	2129	590	GFR09827.1	GFR09827.1 jerky protein homolog-like [Trichonephila clavata]	rve superfamily	1.56e-160	Trichonephila clavata	Arthropoda
TRINITY_DN98952_c0_g11_i3	2129	590	GFU88659.1	GFU88659.1 jerky protein homolog-like [Trichonephila clavipes]	rve superfamily	3.52e-159	Trichonephila clavipes	Arthropoda
TRINITY_DN98952_c0_g11_i3	2129	590	XP_042295721.1	XP_042295721.1 jerky protein homolog-like [Sceloporus undulatus]	rve superfamily	5.58e-154	Sceloporus undulatus	Chordata
TRINITY_DN98952_c0_g11_i3	2129	590	XP_028664086.1	XP_028664086.1 jerky protein homolog-like [Erpetoichthys calabaricus]	rve superfamily	6.61e-152	Erpetoichthys calabaricus	Chordata
TRINITY_DN98952_c0_g11_i3	2129	590	XP_029176761.1	XP_029176761.1 jerky protein homolog-like [Nylanderia fulva]	rve superfamily	1.6e-150	Nylanderia fulva	Arthropoda
TRINITY_DN98952_c0_g11_i3	2129	590	XP_028660442.1	XP_028660442.1 jerky protein homolog-like [Erpetoichthys calabaricus]	rve superfamily	2.97e-150	Erpetoichthys calabaricus	Chordata
TRINITY_DN98952_c0_g11_i3	2129	590	GFS84640.1	GFS84640.1 jerky protein homolog-like [Trichonephila clavipes]	rve superfamily	3.8e-150	Trichonephila clavipes	Arthropoda
TRINITY_DN99452_c1_g3_i2	2186	518	PIK41585.1	PIK41585.1 putative tubulin alpha-3 chain-like [Apostichopus japonicus]	PLN00221 superfamily	8.75e-11	Apostichopus japonicus	Echinodermata
TRINITY_DN99452_c1_g3_i2	2186	518	KPP57071.1	KPP57071.1 hypothetical protein Z043_125240, partial [Scleropages formosus]	PLN00221 superfamily	7.36e-10	Scleropages formosus	Chordata
TRINITY_DN99452_c1_g3_i2	2186	518	OBS79474.1	OBS79474.1 hypothetical protein A6R68_18079, partial [Neotoma lepida]	PLN00221 superfamily	2.03e-09	Neotoma lepida	Chordata
[truncated: 2,760 more rows]
